# Supplementary material
Source: PubMed Central journal article supplement (PMC4406487)
Supplement: NIHMS673498-supplement-Supplementary_Information.pdf [file NIHMS673498-supplement-Supplementary_Information.pdf]

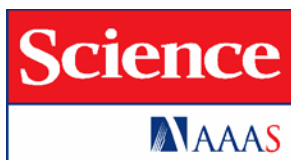

Supplementary Materials for  
**Single-electron transmetalation in organoboron cross-coupling by  
photoredox/nickel dual catalysis**

John C. Tellis, David N. Primer, Gary A. Molander\*

\*Corresponding author. E-mail: gmolandr@sas.upenn.edu

Published 5 June 2014 on *Science Express*  
DOI: 10.1126/science.1253647

**This PDF file includes:**

Materials and Methods

Supplementary Text

Figs. S1 to S9

NMR spectra

References and Notes

**Single-Electron Transmetalation in Organoboron Cross-Coupling  
by Photoredox/Nickel Dual Catalysis**

John C. Tellis, David N. Primer, and Gary A. Molander\*

*Roy and Diana Vagelos Laboratories, Department of Chemistry,  
University of Pennsylvania, Philadelphia,  
Pennsylvania 19104-6323*

\*To whom correspondence should be addressed. E-mail: gmolandr@sas.upenn.edu

**Supplementary Material**

|                                                               |                  |
|---------------------------------------------------------------|------------------|
| General considerations                                        | <b>S2</b>        |
| General procedures for synthesis of benzylic trifluoroborates | <b>S2-S3</b>     |
| Synthesis of photocatalyst <b>4</b>                           | <b>S3-S5</b>     |
| Selected reaction optimization studies                        | <b>S5-S8</b>     |
| General procedure for photoredox cross-coupling reactions     | <b>S8-S9</b>     |
| Benzyl-aryl competition experiment details                    | <b>S10</b>       |
| Procedure for stereoconvergent cross-coupling                 | <b>S11</b>       |
| Compound characterization data                                | <b>S12-S23</b>   |
| Spectral data                                                 | <b>S24-S126</b>  |
| References                                                    | <b>S127-S130</b> |

## General considerations

All reactions were carried out under an inert atmosphere of nitrogen or argon unless otherwise noted. Acetone (99.9%, extra dry), methanol (99.8% extra dry), and DMF (99.8%, anhydrous) were used as received. 2,6-Lutidine (>99%, purified by redistillation) was used without further purification (high purity lutidine was found to be important for reproducibly obtaining high yields. Commercially redistilled lutidine or lutidine distilled from  $\text{AlCl}_3$  and stored under  $\text{N}_2$  gave similar results).  $\text{CuI}$ ,  $\text{IrCl}_3 \cdot x\text{H}_2\text{O}$ , and  $\text{Ni}(\text{COD})_2$  were from commercial sources. Potassium benzyltrifluoroborate was purchased or prepared using a published procedure (30). Potassium (1-(benzyloxy)-3-phenylpropyl)trifluoroborate and potassium trifluoro(1-phenylethyl)borate were prepared according to published procedures (31, 38). All other reagents were purchased commercially and used as received. Photoredox reactions were irradiated with a standard 26W compact fluorescent light bulb. Stereoconvergent cross-couplings were irradiated with blue LED light strips (~425 nm). Melting points ( $^\circ\text{C}$ ) are uncorrected. NMR spectra were recorded on a 500 or 400 MHz spectrometer.  $^{19}\text{F}$  NMR chemical shifts were referenced to external  $\text{CFCl}_3$  (0.0 ppm).  $^{11}\text{B}$  NMR spectra were obtained on a spectrometer equipped with the appropriate decoupling accessories. All  $^{11}\text{B}$  NMR chemical shifts were referenced to an external  $\text{BF}_3 \cdot \text{OEt}_2$  (0.0 ppm) with a negative sign indicating an upfield shift. Data are presented as follows: chemical shift (ppm), multiplicity (s = singlet, d = doublet, t = triplet, dd = doublet of doublets, m = multiplet, br = broad), coupling constant  $J$  (Hz) and integration. The  $^{13}\text{C}$  signal of the carbon bonded to boron was not observed in some cases due to quadrupolar relaxation.

## General procedure A for synthesis of benzylic trifluoroborates

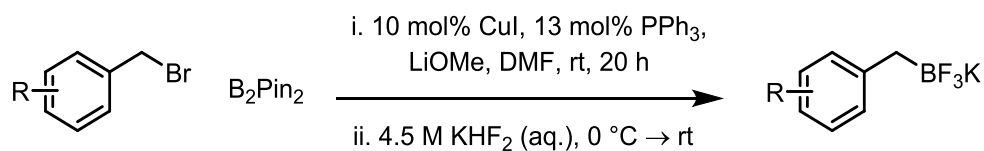

According to an unoptimized procedure derived from that reported by Liu and coworkers (39), to a flame-dried 20 mL vial was added benzylic bromide (5 mmol) and triphenylphosphine (173 mg, 0.66 mmol). The vial was taken into a glovebox and  $\text{CuI}$  (95 mg, 0.5 mmol),  $\text{LiOMe}$  (380 mg, 10 mmol, 2 equiv), and bis(pinacolato)diboron (1.93 g, 7.6 mmol, 1.52 equiv) were added. The vial was sealed with a Teflon lined silicone septum,  $\text{DMF}$  was added, and the mixture was stirred vigorously under inert atmosphere at room temperature for 20 h. The resultant brown, viscous mixture was filtered through a pad of silica gel, washing with  $\text{EtOAc}$  (60–100 mL). The filtrate was diluted with  $\text{MeOH}$  (HPLC grade, ~50 mL), cooled to  $0\text{ }^\circ\text{C}$ . Then sat. aq.  $\text{KHF}_2$  (9 mL, 40.5 mmol, 8.1 equiv) was added dropwise over 15 to 30 min, and the soln was allowed to warm to  $\text{rt}$ . The resultant suspension was concentrated under reduced pressure. Pinacol and  $\text{H}_2\text{O}$  were azeotropically removed by suspension in toluene (100–150 mL) followed by rotary evaporation. The remaining solid was dried under high vacuum and then suspended in hot acetone (3 x 100 mL) and filtered. The filtrate was concentrated to a minimal volume (5–20 mL) and hexane (~200 mL) was added to yield a white precipitate. The precipitate was isolated by filtration, washing with hexane (~30 mL) and  $\text{CH}_2\text{Cl}_2$  (~30 mL) to afford the desired benzylic trifluoroborate.

## General procedure B for synthesis of benzylic trifluoroborates

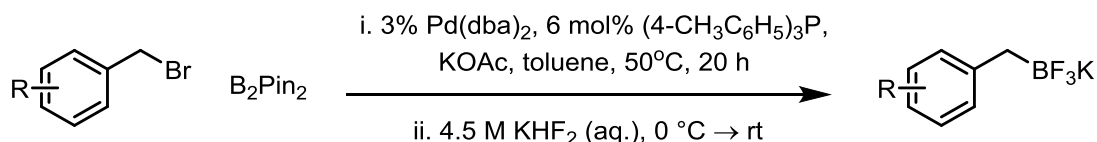

According to an unoptimized procedure derived from that reported by Miyaura and coworkers (40), to a flame dried 100 mL round bottom flask equipped with a stir bar was added benzylic bromide (5 mmol), KOAc (736 mg, 7.5 mmol), and (4-MeC<sub>6</sub>H<sub>4</sub>)<sub>3</sub>P (91 mg, 0.30 mmol). The flask was taken into the glovebox and Pd(dba)<sub>2</sub> (86 mg, 0.15 mmol) and bis(pinacolato)diboron (1.40 g, 5.5 mmol) were added. The flask was sealed with a rubber septum, toluene was added (30 mL), and the mixture was stirred vigorously under inert atmosphere for 20 h. The resultant yellow-brown mixture was concentrated to near dryness and then diluted with MeOH (HPLC grade, 20 mL), cooled to 0 °C, and sat. KHF<sub>2</sub> (9 mL, 40.5 mmol, 8.1 equiv.) was added dropwise by an addition funnel under inert atmosphere during 30 min. The resulting suspension was concentrated under reduced pressure. Pinacol and H<sub>2</sub>O were azeotropically removed by suspension in toluene (100-150 mL) followed by rotary evaporation. The remaining solid was dried under high vacuum and then suspended in hot acetone (3 x 100 mL) and filtered. The filtrate was concentrated to a minimal volume (5 – 20 mL) and hexane (~200 mL) was added to yield a white precipitate. The precipitate was isolated by filtration, washing with hexanes (~30 mL) and CH<sub>2</sub>Cl<sub>2</sub> (~30 mL), to afford the desired benzylic trifluoroborate.

## Synthesis of photocatalyst 4

The synthesis of photocatalyst **4** has been documented in literature reports, though never compiled in one location. In an effort to aid the practicing chemist, the procedures found to be most effective in our hands are compiled below. Alternatively, the 4,4'-di-*tert*-butyl bipyridine derivative of **4** is commercially available.

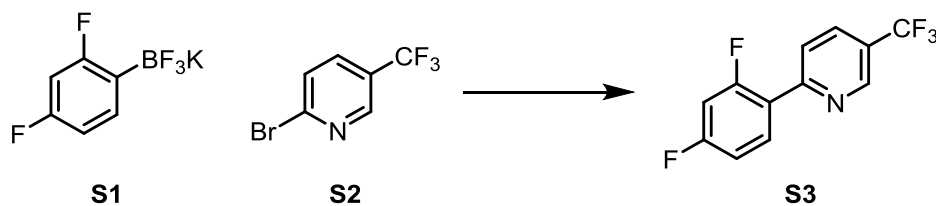

To a large vial equipped with a magnetic stir bar was added **S1** (3.3 g, 15 mmol), **S2** (2.26 g, 10 mmol), anhyd. K<sub>2</sub>CO<sub>3</sub> (6.9 g, 50 mmol), and Pd(PPh<sub>3</sub>)<sub>4</sub> (1.16 g, 1 mmol). The vial was sealed tightly with a Teflon-coated septum cap and evacuated and purged with N<sub>2</sub> three times. The contents were dissolved in THF (32 mL) and degassed H<sub>2</sub>O (16 mL), then stirred at 80 °C for 24 h. After cooling to rt, the reaction mixture was diluted with H<sub>2</sub>O and extracted three times with CH<sub>2</sub>Cl<sub>2</sub> (3 x 60 mL). The combined organic layers were dried (MgSO<sub>4</sub>), filtered, concentrated

under reduced pressure, and purified by silica gel column chromatography, eluting with 5% EtOAc in hexanes to afford ligand **S3** as white solid (2.54 g, 98%). Mp = 55-58 °C.

A small amount of triphenylphosphine was usually observed after column chromatography (<5 mol %) which did not interfere with subsequent reactions.

<sup>1</sup>H NMR (500 MHz, CDCl<sub>3</sub>): δ = 8.96 (s, 1H), 8.12-8.07 (m, 1H), 7.98 (dd, *J* = 8.5, 2.0 Hz, 1H), 7.90 (d, *J* = 8.5 Hz, 1H), 7.06-7.02 (m, 1H), 6.97-6.92 (m, 1H)

<sup>13</sup>C NMR (125.8 MHz, CDCl<sub>3</sub>): δ = 163.8 (dd, *J* = 253.1, 12.5 Hz), 161.1 (dd, *J* = 253.5, 12.0 Hz), 155.8, 133.8 (d, *J* = 3.1 Hz), 132.6 (dd, *J* = 9.7, 4.0 Hz), 128.6 (d, *J* = 6.9 Hz), 125.2 (q, *J* = 33.1 Hz), 123.70 (q, *J* = 272.2 Hz), 123.68 (d, *J* = 10.9 Hz), 122.5 (dd, *J* = 11.2, 3.8 Hz), 112.3 (dd, *J* = 21.1, 3.5 Hz), 104.7 (dd, *J* = 26.0, 26.0 Hz)

<sup>19</sup>F NMR (CDCl<sub>3</sub>, 470.8 MHz): δ = -62.3, -107.1 (d, *J* = 8.5 Hz), 112.0 (d, *J* = 8.5 Hz)

IR: ν = 2925, 2337, 1601, 1321, 1119, 1058 cm<sup>-1</sup>

HRMS: (ESI) *m/z* calc. for C<sub>12</sub>H<sub>7</sub>NF<sub>5</sub> (M+H) 259.0499, found 259.0421

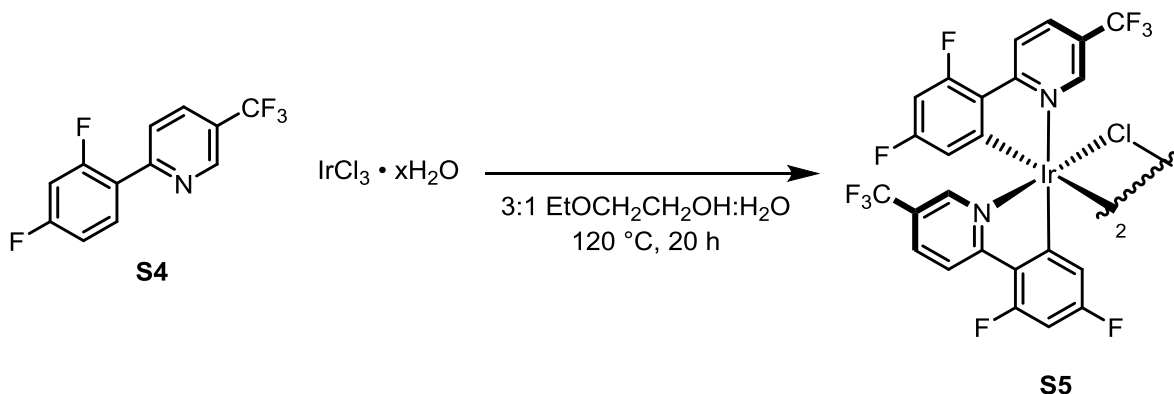

To a 20 mL round-bottom flask equipped with a magnetic stir bar was added ligand **S4** (428 mg, 1.65 mmol) and IrCl<sub>3</sub> hydrate (224 mg, 0.75 mmol). The flask was equipped with a cold water condenser and evacuated and purged with N<sub>2</sub> five times. The contents were suspended in rigorously degassed ethoxyethanol (9 mL) and water (3 mL) and then heated with stirring to 120 °C for 20 h, during which time a yellow precipitate was observed to form. After cooling to rt, the precipitate was collected by vacuum filtration. The filter cake was washed copiously with H<sub>2</sub>O (~75 mL) and hexanes (~30 mL) to afford iridium μ-Cl-dimer **S5** as a fine yellow powder (84%). Mp = >250 °C. Characterization data for this compound matched that reported in the literature (23).

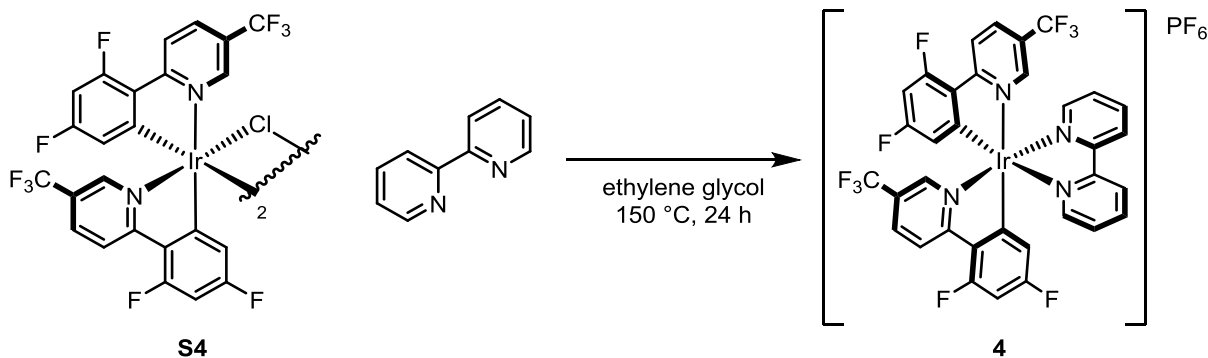

To a 15 mL round-bottom flask equipped with a magnetic stir bar was added iridium dimer **S4** (130 mg, 0.087 mmol) and 2,2'-bipyridine (32 mg, 0.21 mmol). The flask was attached to a reflux condenser and the contents were placed under an inert atmosphere by three evacuation/purge cycles. The reaction components were dissolved in degassed ethylene glycol (6 mL) and heated with stirring at 150 °C for 24 h. Upon cooling to rt, the reaction mixture was diluted with deionized H<sub>2</sub>O and transferred to a separatory funnel. The aqueous phase was washed three times with hexanes, then drained into an Erlenmeyer flask and heated to ~85 °C for 5-15 min. to remove residual hexanes. Upon cooling to rt, an aq soln of NH<sub>4</sub>PF<sub>6</sub> (10 mL, 0.1 g/mL) was added, resulting in the formation of a fine yellow precipitate that was isolated by vacuum filtration, washing with H<sub>2</sub>O (20 mL) and hexanes (15 mL). The solid was dried under high vacuum to remove residual H<sub>2</sub>O and then dissolved in acetone and recrystallized by vapor diffusion with pentane to yield **4** as large yellow crystals (172 mg, 88%). Mp = 199-202 °C. Characterization data for this compound matched that reported in the literature (41).

### Selected reaction optimization studies

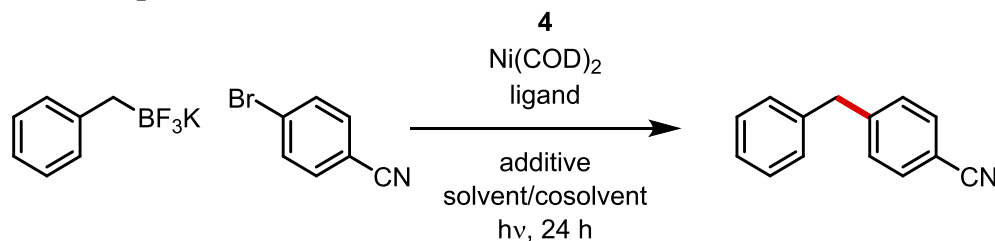

*Procedure for reaction screening at 0.01 or 0.05 mmol scale:* To a reaction vial equipped with a Teflon coated magnetic stir bar in a glovebox was added a soln of Ni(COD)<sub>2</sub> and ligand [1:1 Ni(COD)<sub>2</sub>:ligand] dissolved in THF. The solvent was removed *in vacuo* under an inert atmosphere, then a soln of potassium benzyltrifluoroborate (1 equiv), 4-bromobenzonitrile (1 equiv), and 4,4'-di-*tert*-butylbiphenyl (0.1 equiv) in solvent was added, followed by a soln of photocatalyst **4**. If desired, an alcoholic cosolvent or amine base was added before the vial was sealed and stirred over blue LED lights. After 24 h the reactions were opened to air, diluted with acetonitrile, and analyzed by reversed phase analytical HPLC using product:internal standard (4,4'-di-*tert*-butylbiphenyl) ratios as a qualitative assessment of reaction yield.

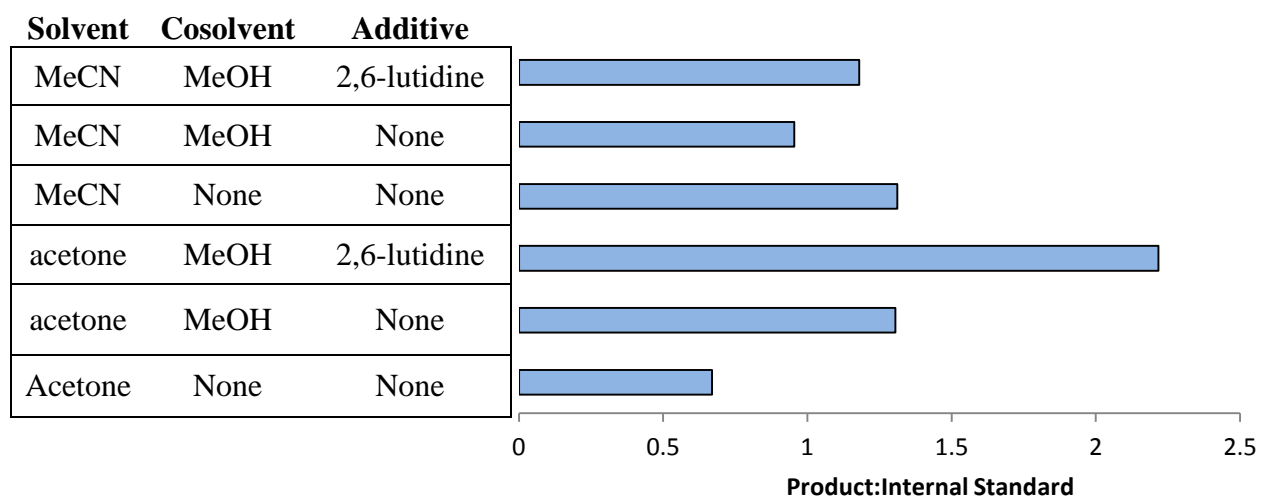

**Fig S1:** Conditions: 2 mol % **4**, 10 mol % Ni(COD)<sub>2</sub>, 10 mol % 2,2'-bipyridine, 0.1 M, 24 h, 0.01 mmol

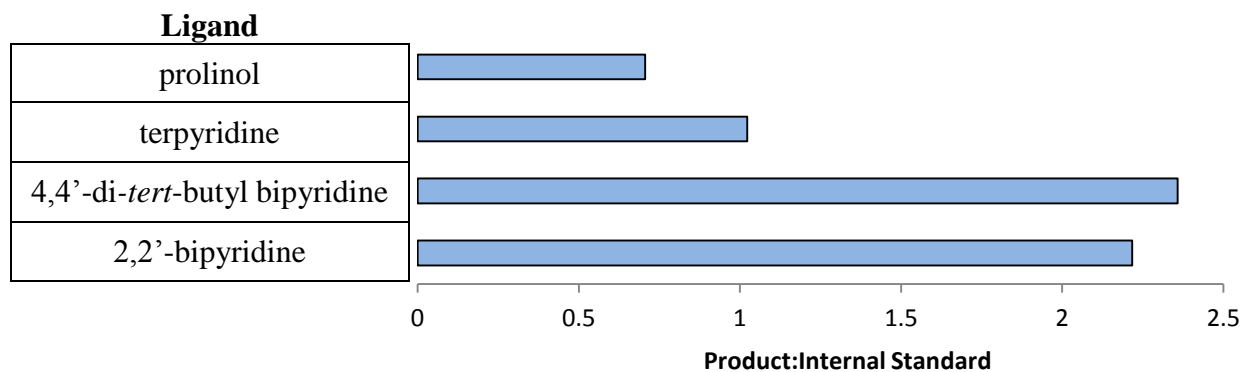

**Fig S2:** Conditions: 2 mol % **4**, 10 mol % Ni(COD)<sub>2</sub>, 10 mol % ligand, 10:1 acetone/MeOH, 2 equiv 2,6-lutidine, 0.1 M, 24 h, 0.01 mmol

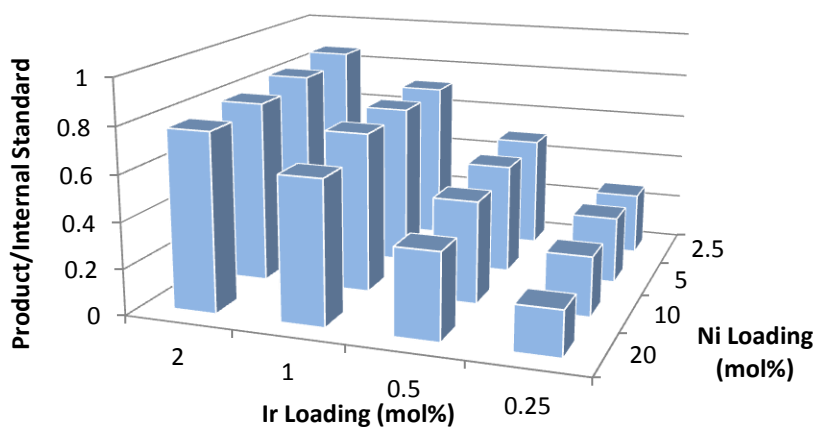

**Fig S3:** Conditions: 1:1 Ni(COD)<sub>2</sub>/dtbbpy, 10:1 acetone/MeOH, 2 equiv 2,6-lutidine, 0.1 M, 24h, 0.05 mmol

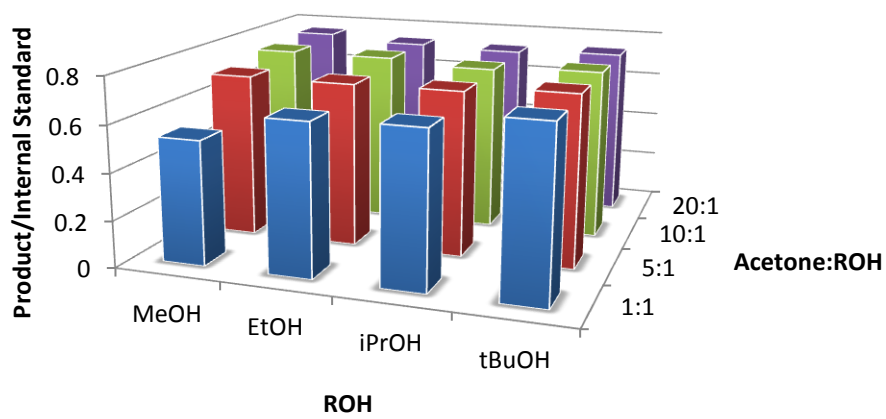

**Fig S4:** Conditions: 1 mol % **4**, 5 mol % Ni(COD)<sub>2</sub>, 5 mol % dtbbpy, 10:1 acetone/alcohol, 2 equiv 2,6-lutidine, 0.1 M, 24 h, 0.05 mmol



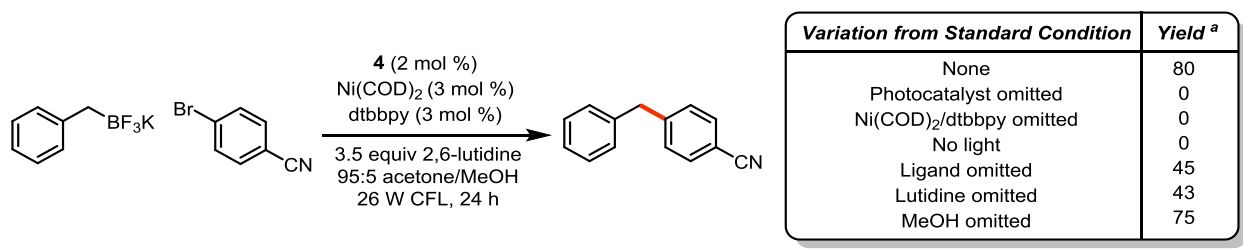

Reactions performed on 0.05 mmol scale; <sup>a</sup> Yield determined by calibrated HPLC analysis

**Fig S5:** Conditions: 2 mol% **4**, 3 mol % Ni(COD)<sub>2</sub>, 3 mol % dtbbpy, 95:5 acetone/methanol, 3.5 equiv 2,6-lutidine, 0.1 M, 24 h, 0.05 mmol

### General procedure for photoredox cross-coupling reactions

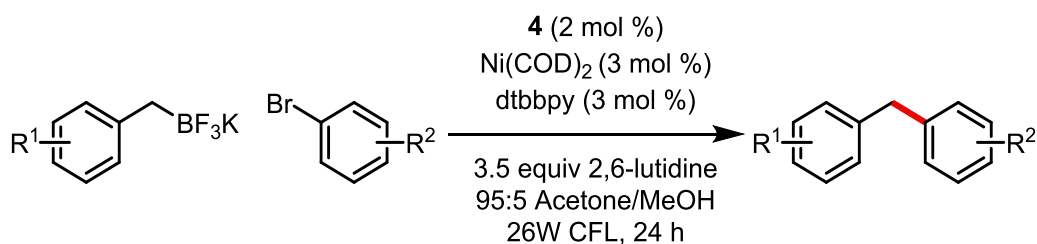

To a two dram (8 mL) borosilicate glass vial equipped with a Teflon-coated magnetic stir bar was added aryl bromide (0.5 mmol, 1 equiv) (liquid aryl bromides were added with solvent), benzylic trifluoroborate (0.6 mmol, 1.2 equiv), Ir[dFCF<sub>3</sub>ppy]<sub>2</sub>(bpy)PF<sub>6</sub> **4** (10 mg, 0.01 mmol), and 4,4'-di-*tert*-butyl-2,2'-bipyridine (4.0 mg, 0.015 mmol). The vial was taken into a glovebox and Ni(COD)<sub>2</sub> (4.1 mg, 0.015 mmol) was added. The vial was sealed with a plastic screw cap containing a Teflon-lined silicone septum, removed from the glovebox, and evacuated and purged with inert gas three times. Under inert atmosphere was introduced successively acetone (4.75 mL), methanol (0.25 mL), and 2,6-lutidine (202 μL, 1.75 mmol, 3.5 equiv). The vial was sealed with Teflon ribbon, electrical tape, and parafilm and stirred for 24 hours approximately 3 cm from a 26 W fluorescent light bulb. The crude reaction mixture was filtered through an approximately 2 cm x 2 cm cylindrical plug of Celite, washing with EtOAc (30–50 mL). The residue was purified by column chromatography on silica gel, eluting with EtOAc and hexanes, to obtain products in pure form.

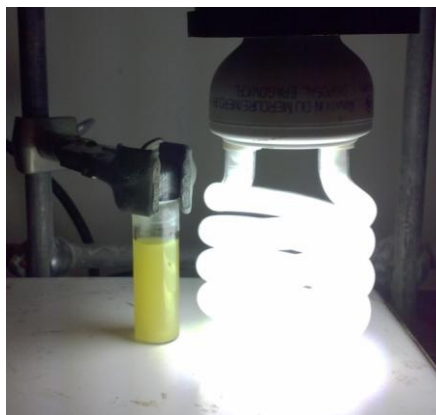

**Fig S6:** Photoredox cross-coupling reaction set-up (0.5 mmol scale)

**Gram scale reaction:** To a ~75 mL Schlenk flask equipped with a Teflon-coated magnetic stir bar was added 4-bromobenzonitrile (1.000 g, 5.49 mmol, 1 equiv), benzyl trifluoroborate (1.306 g, 6.59 mmol, 1.2 equiv), Ir[dFCF<sub>3</sub>ppy]<sub>2</sub>(bpy)PF<sub>6</sub> **4** (55.0 mg, 0.055 mmol, 0.01 equiv), and 4,4'-di-*tert*-butyl-2,2'-bipyridine (22.0 mg, 0.082 mmol, 0.015 equiv). The flask was taken into the glovebox and Ni(COD)<sub>2</sub> (22.5 mg, 0.082 mmol, 0.015 equiv) was added. The flask was sealed and under an inert atmosphere, acetone (47.5 mL), methanol (2.5 mL), and 2,6-lutidine (2.24 mL, 19.2 mmol, 3.5 equiv) were added successively. The reaction was stirred ~5 cm from two 26 watt compact fluorescent light bulbs for 24 h. After filtration through Celite, the residue was purified by column chromatography on silica gel, eluting with EtOAc and hexanes, to obtain the product in pure form.

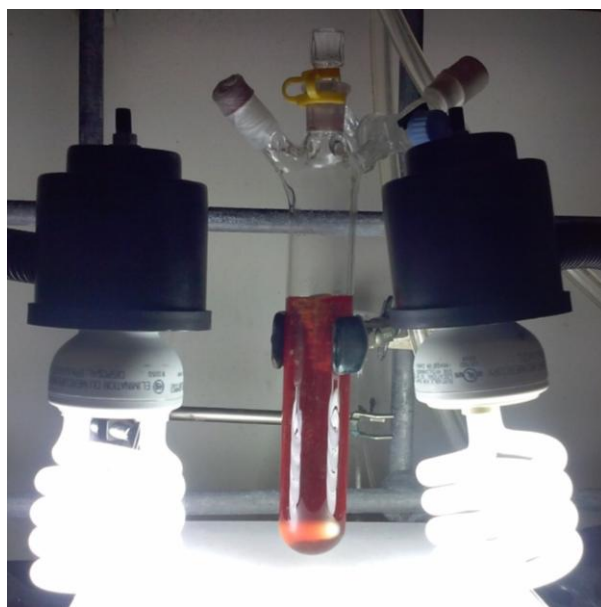

**Fig S7:** Gram scale photoredox cross-coupling reaction set-up (5.5 mmol)

## Benzyl-aryl competition experiment details

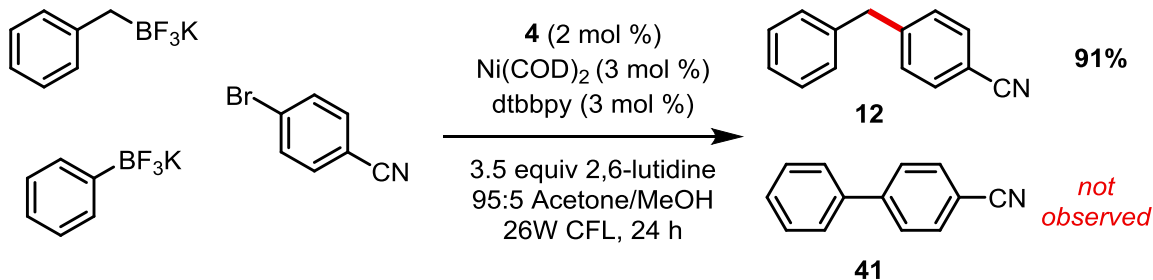

The reaction was performed according to the general procedure for photoredox cross-coupling at 0.5 mmol scale using 1.2 equiv BnBF<sub>3</sub>K and 1.2 equiv PhBF<sub>3</sub>K. The crude reaction was analyzed by reversed phase analytical HPLC. A product standard for biaryl **41** was synthesized according to a literature procedure (42). After workup and purification according to the general procedure, diarylmethane product **12** was isolated in 91% yield (88 mg).

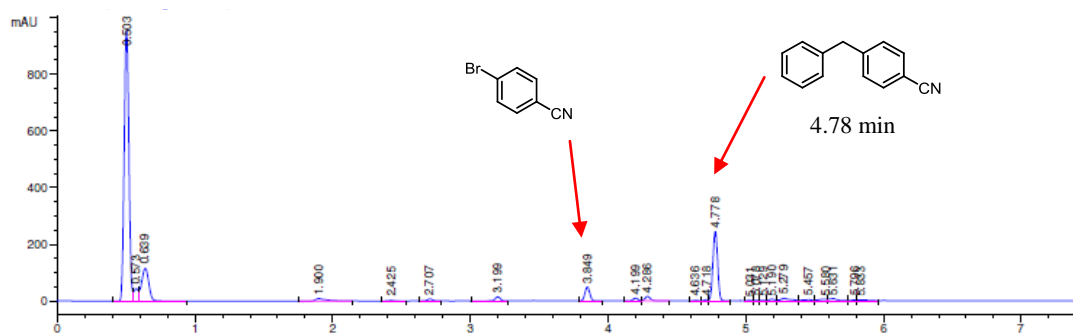

**Fig S8:** Crude HPLC chromatogram for benzyl-aryl competition experiment under photoredox cross-coupling conditions.

A traditional Suzuki-Miyaura cross-coupling was performed for comparison of the product distribution in the photoredox cross-coupling to that of a cross-coupling employing a traditional transmetalation. The reaction was performed on 0.2 mmol scale using 1.2 equiv BnBF<sub>3</sub>K, 1.2 equiv PhBF<sub>3</sub>K, and 1 mol % Pd(OAc)<sub>2</sub>. The crude reaction mixture was analyzed by reversed phase analytical HPLC.

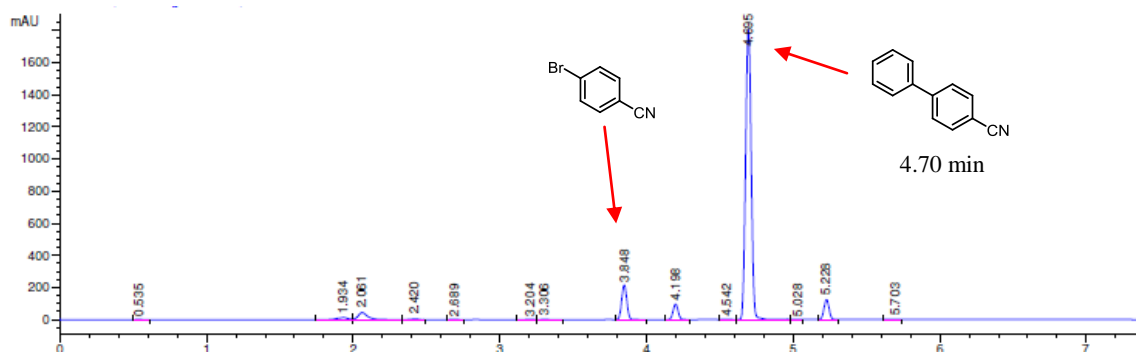

**Fig S9:** Crude HPLC chromatogram for benzyl-aryl competition experiment under conventional Suzuki-Miyaura cross-coupling conditions

## Procedure for stereoconvergent cross-coupling

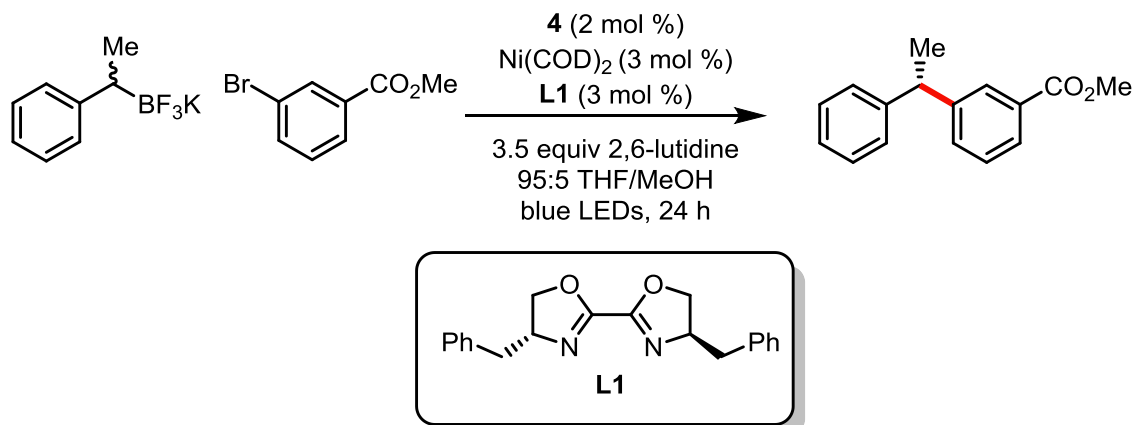

To a two dram (8 mL) borosilicate glass vial equipped with a Teflon-coated magnetic stir bar was added methyl 3-bromobenzoate (108 mg, 0.5 mmol, 1 equiv), potassium trifluoro(1-phenylethyl)borate (127 mg, 0.6 mmol, 1.2 equiv), Ir[dFCF<sub>3</sub>ppy]<sub>2</sub>(bpy)PF<sub>6</sub> **4** (10 mg, 0.01 mmol), and **L1** (4.8 mg, 0.015 mmol). The vial was taken into a glovebox and Ni(COD)<sub>2</sub> (4.1 mg, 0.015 mmol) was added. The vial was sealed with a plastic screw cap containing a Teflon-lined silicone septum, removed from the glovebox, and evacuated and purged with inert gas three times. Under inert atmosphere THF (4.75 mL), MeOH (0.25 mL), and 2,6-lutidine (202 μL, 1.75 mmol, 3.5 equiv) were introduced successively. The vial was sealed with Teflon ribbon, electrical tape, and parafilm and stirred for 24 h in a crystallization dish surrounded by blue LED lights. The crude reaction mixture was filtered through an approximately 2 cm x 2 cm cylindrical plug of Celite, washing with EtOAc (30–50 mL). The residue was purified by column chromatography on silica gel, eluting with EtOAc and hexanes, to obtain product in pure form.

## Compound Characterization Data

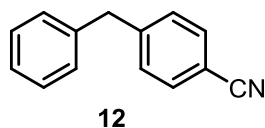

**4-Benzylbenzonitrile (12)**: obtained as a white crystalline solid (86 mg, 89%); gram scale (1029 mg, 97%), Mp = 47–50 °C

<sup>1</sup>H NMR (CDCl<sub>3</sub>, 500 MHz): δ = 7.57 (d, *J* = 8.5 Hz, 2H), 7.25–7.32 (m, 5H), 7.17 (d, *J* = 7.5 Hz, 2H), 4.04 (s, 2H)

<sup>13</sup>C NMR (CDCl<sub>3</sub>, 125.8 MHz): δ = 146.9, 139.5, 132.4, 129.8, 129.1, 128.9, 126.8, 119.1, 110.2, 42.1

Characterization data matched that reported in the literature (43).

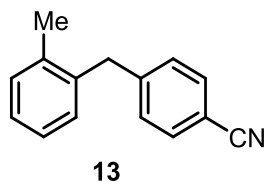

**4-(2-Methylbenzyl)benzonitrile (13):** obtained as a white solid (85 mg, 82%), Mp = 50-52 °C  
<sup>1</sup>H NMR (CDCl<sub>3</sub>, 500 MHz): δ = 7.57 (d, *J* = 8.5 Hz, 2H), 7.26-7.21 (m, 5H), 7.13-7.12 (m, 1H), 4.07 (s, 2H), 2.24 (s, 3H)  
<sup>13</sup>C NMR (CDCl<sub>3</sub>, 125.8 MHz): δ = 146.2, 137.2, 136.5, 132.2, 130.5, 130.0, 129.3, 127.0, 126.2, 118.9, 109.9, 39.5, 19.6  
 Characterization data matched that reported in the literature (44).

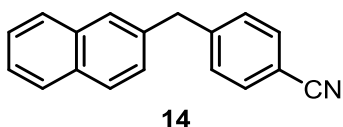

**4-(Naphthalen-2-ylmethyl)benzonitrile (14):** obtained as a white solid (121 mg, 99%), Mp = 105-110 °C  
<sup>1</sup>H NMR (CDCl<sub>3</sub>, 500 MHz): δ = 7.83-7.77 (m, 3H), 7.62 (s, 1H), 7.58 (m, 2H), 7.48 (m, 2H), 7.33 (d, *J* = 8.0 Hz, 2H), 7.27-7.25 (m, 1H), 4.20 (s, 2H)  
<sup>13</sup>C NMR (CDCl<sub>3</sub>, 125.8 MHz): δ = 146.5, 136.8, 133.6, 132.3, 129.7, 128.5, 127.7, 127.5, 127.4, 126.3, 125.8, 119.0, 110.1, 42.1  
 Characterization data matched that reported in the literature (45).

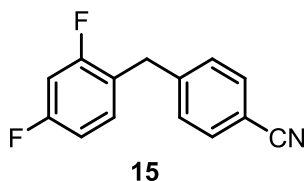

**4-(2,4-Difluorobenzyl)benzonitrile (15):** obtained as a white crystalline solid (80 mg, 70%), Mp = 63-65 °C  
<sup>1</sup>H NMR (CDCl<sub>3</sub>, 500 MHz): δ = 7.59 (d, *J* = 8.0 Hz, 2H), 7.30 (d, *J* = 8.0 Hz, 2H), 7.13-7.11 (m, 1H), 6.86-6.82 (m, 2H), 4.02 (s, 2H)  
<sup>13</sup>C NMR (CDCl<sub>3</sub>, 125.8 MHz): δ = 162.3 (dd, *J* = 148.6, 11.8 Hz), 160.3 (dd, *J* = 148.9, 11.8 Hz), 145.1, 132.3, 131.5 (dd, *J* = 9.7, 6.2 Hz), 129.3, 122.2 (dd, *J* = 12.5, 3.6 Hz), 118.7, 111.4 (dd, *J* = 21.1, 3.8 Hz), 110.3, 104.0 (dd, *J* = 25.5, 25.5 Hz)  
<sup>19</sup>F NMR (CDCl<sub>3</sub>, 470.8 MHz): δ = -111.7, -113.0  
 IR: ν = 2225, 1604, 1500, 1269, 1136, 968, 852 cm<sup>-1</sup>  
 HRMS: (ESI) *m/z* calc. for C<sub>14</sub>H<sub>10</sub>NF<sub>2</sub> (M+H) 230.0781, found 230.0772

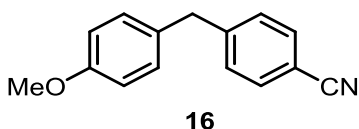

**4-(4-Methoxybenzyl)benzonitrile (16):** obtained as a white solid (105 mg, 94%), Mp = 48-50 °C

<sup>1</sup>H NMR (CDCl<sub>3</sub>, 500 MHz): δ = 7.56 (d, *J* = 8.0 Hz, 2H), 7.27 (d, *J* = 7.5 Hz, 2H), 7.07 (d, *J* = 8.5 Hz, 2H), 6.85 (d, *J* = 9.0 Hz, 2H), 3.97 (s, 2H), 3.79 (s, 3H)

<sup>13</sup>C NMR (CDCl<sub>3</sub>, 125.8 MHz): δ = 158.5, 147.4, 132.4, 131.6, 130.1, 129.7, 119.2, 114.3, 110.0, 55.4, 41.2

Characterization data matched that reported in the literature (46).

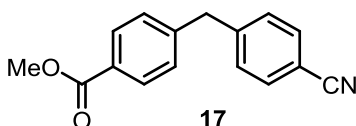

**Methyl 4-(4-Cyanobenzyl)benzoate (17):** obtained as a colorless oil (94 mg, 75%)

<sup>1</sup>H NMR (CDCl<sub>3</sub>, 500 MHz): δ = 7.97 (d, *J* = 8.0 Hz, 2H), 7.57 (d, *J* = 8.0 Hz, 2H), 7.27 (d, *J* = 8.0 Hz, 2H), 7.22 (d, *J* = 8.0 Hz, 2H), 4.08 (s, 2H), 3.89 (s, 3H)

<sup>13</sup>C NMR (CDCl<sub>3</sub>, 125.8 MHz): δ = 167.0, 145.8, 144.7, 132.6, 130.2, 129.8, 129.1, 128.8, 119.0, 110.5, 52.3, 42.0

Characterization data matched that reported in the literature (44).

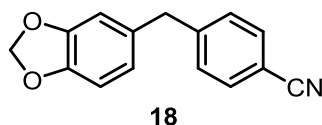

**4-(Benzo[d][1,3]dioxol-5-ylmethyl)benzonitrile (18):** obtained as a white crystalline solid (115 mg, 97%), Mp = 106-108 °C

<sup>1</sup>H NMR (CDCl<sub>3</sub>, 500 MHz): δ = 7.56 (d, *J* = 8.0 Hz, 2H), 7.27 (d, *J* = 8.0 Hz, 2H), 6.75 (d, *J* = 8.0 Hz, 1H), 6.64-6.61 (m, 2H), 5.92 (s, 2H), 3.93 (s, 2H)

<sup>13</sup>C NMR (CDCl<sub>3</sub>, 125.8 MHz): δ = 148.1, 147.0, 146.5, 133.2, 132.4, 129.6, 122.1, 119.1, 110.2, 109.5, 108.6, 101.2, 41.8

IR: ν = 2920, 2362, 2226, 1604, 1491, 1254, 1038, 927, 816 cm<sup>-1</sup>

HRMS: (ESI) *m/z* calc. for C<sub>15</sub>H<sub>12</sub>NO<sub>2</sub> (M+H) 238.0868, found 238.0860

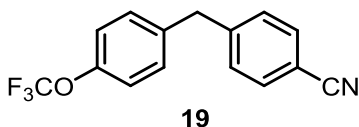

**4-(4-(Trifluoromethoxy)benzyl)benzonitrile (19):** obtained as a colorless oil (106 mg, 76%)

<sup>1</sup>H NMR (CDCl<sub>3</sub>, 500 MHz): δ = 7.58 (d, *J* = 8.0 Hz, 2H), 7.28 (d, *J* = 8.0 Hz, 2H), 7.19-7.15 (m, 4H), 4.04 (s, 2H)

$^{13}\text{C}$  NMR ( $\text{CDCl}_3$ , 125.8 MHz):  $\delta = 147.9, 145.9, 138.0, 132.3, 130.1, 129.5, 121.2, 120.4$  (q,  $J = 257.3$  Hz), 118.7, 110.3, 41.1

$^{19}\text{F}$  NMR ( $\text{CDCl}_3$ , 470.8 MHz):  $\delta = -57.9$

IR:  $\nu = 2920, 2228, 1608, 1508, 1257, 1222, 1161, 1020, 921, 811$   $\text{cm}^{-1}$

HRMS (ESI)  $m/z$  calc. for  $\text{C}_{15}\text{H}_{11}\text{NOF}_3$  (M+H) 178.0793, found 178.0795

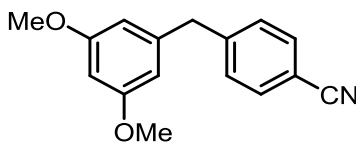

**20**

**4-(3,5-Dimethoxybenzyl)benzonitrile (20)**: obtained as a colorless oil (108 mg, 86%)

$^1\text{H}$  NMR ( $\text{CDCl}_3$ , 500 MHz):  $\delta = 7.57$  (d,  $J = 8.5$  Hz, 2H), 7.29 (d,  $J = 8.0$  Hz, 2H), 6.34 (s, 1H), 6.30 (s, 2H), 3.95 (s, 2H), 3.76 (s, 6H)

$^{13}\text{C}$  NMR ( $\text{CDCl}_3$ , 125.8 MHz):  $\delta = 161.2, 146.5, 141.7, 132.4, 129.7, 119.1, 110.2, 107.4, 98.4, 55.4, 42.3$

IR:  $\nu = 2937, 2838, 2358, 2227, 1594, 1461, 1430, 1205, 1156, 1065, 822$   $\text{cm}^{-1}$

HRMS (ESI)  $m/z$  calc. for  $\text{C}_{16}\text{H}_{16}\text{NO}_2$  (M+H) 254.1181, found 254.1182

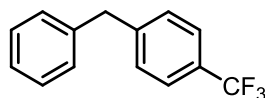

**21**

**1-Benzyl-4-(trifluoromethyl)benzene (21)**: obtained as a colorless oil (93 mg, 79%)

$^1\text{H}$  NMR ( $\text{CDCl}_3$ , 500 MHz):  $\delta = 7.52$  (d,  $J = 8.0$  Hz, 2H), 7.30-7.26 (m, 4H), 7.22-7.19 (m, 1H), 7.16 (d,  $J = 7.5$  Hz, 2H), 4.01 (s, 2H)

$^{13}\text{C}$  NMR ( $\text{CDCl}_3$ , 125.8 MHz):  $\delta = 145.4, 140.2, 129.4, 129.1, 128.9, 128.7$  (q,  $J = 32.2$  Hz), 126.7, 125.6 (q,  $J = 3.9$  Hz), 123.4, 41.9

$^{19}\text{F}$  NMR ( $\text{CDCl}_3$ , 470.8 MHz):  $\delta = -62.3$

Characterization data matched that reported in the literature (48).

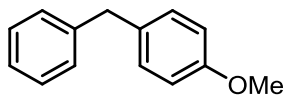

**22**

**1-Benzyl-4-methoxybenzene (22)**: obtained as a colorless oil (74 mg, 75%)

$^1\text{H}$  NMR ( $\text{CDCl}_3$ , 500 MHz):  $\delta = 7.31$ -7.28 (m, 2H), 7.22-7.19 (m, 3H), 7.12 (d,  $J = 8.5$  Hz, 2H), 6.85 (d,  $J = 8.5$  Hz, 2H), 3.95 (s, 2H), 3.80 (s, 3H)

$^{13}\text{C}$  NMR ( $\text{CDCl}_3$ , 125.8 MHz):  $\delta = 158.1, 141.7, 133.4, 130.0, 129.0, 128.5, 126.1, 114.0, 55.4, 41.2$

Characterization data matched that reported in the literature (49).

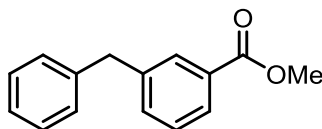

**23**

**Methyl 3-Benzylbenzoate (23):** obtained as a pale yellow oil (102 mg, 90%)

$^1\text{H NMR}$  ( $\text{CDCl}_3$ , 500 MHz):  $\delta = 7.93\text{-}7.89$  (m, 2H), 7.40-7.35 (m, 2H), 7.32-7.30 (m, 2H), 7.24-7.20 (m, 3H), 4.04 (s, 2H), 3.91 (s, 3H)

$^{13}\text{C NMR}$  ( $\text{CDCl}_3$ , 125.8 MHz):  $\delta = 167.3$ , 141.6, 140.7, 133.7, 130.5, 130.2, 129.0, 128.8, 128.7, 127.6, 126.5, 52.3, 41.9

Characterization data matched that reported in the literature (50).

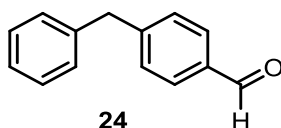

**24**

**4-Benzylbenzaldehyde (24):** obtained as a colorless oil (79 mg, 81%)

$^1\text{H NMR}$  ( $\text{CDCl}_3$ , 500 MHz):  $\delta = 9.98$  (s, 1H), 7.81 (d,  $J = 8.0$  Hz, 2H), 7.36 (d,  $J = 8.0$  Hz, 2H), 7.31 (dd,  $J = 7.5$ , 7.0 Hz, 2H), 7.24 (t,  $J = 7.0$  Hz, 1H), 7.19 (d,  $J = 7.5$  Hz, 2H), 4.06 (s, 2H)

$^{13}\text{C NMR}$  ( $\text{CDCl}_3$ , 125.8 MHz):  $\delta = 192.1$ , 148.6, 139.9, 134.8, 130.2, 129.7, 129.1, 128.8, 126.7, 42.2.

Characterization data matched that reported in the literature (29).

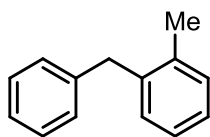

**25**

**1-Benzyl-2-methylbenzene (25):** obtained as a colorless oil (51 mg, 56%)

$^1\text{H NMR}$  ( $\text{CDCl}_3$ , 500 MHz):  $\delta = 7.30\text{-}7.27$  (m, 2H), 7.21-7.11 (m, 7H), 4.01 (s, 2H) 2.26 (s, 3H)

$^{13}\text{C NMR}$  ( $\text{CDCl}_3$ , 125.8 MHz):  $\delta = 140.6$ , 139.1, 136.8, 130.5, 130.2, 129.0, 128.6, 126.7, 126.2, 126.1, 39.7, 19.9

Characterization data matched that reported in the literature (51).

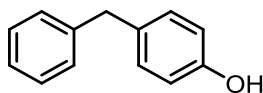

**26**

**4-Benzylphenol (26):** obtained as a white solid (58 mg, 63%), Mp = 80-82 °C

$^1\text{H NMR}$  ( $\text{CDCl}_3$ , 500 MHz):  $\delta = 7.32\text{-}7.29$  (m, 2H), 7.23-7.18 (m, 3H), 7.07 (d,  $J = 8.0$  Hz, 2H), 6.76 (d,  $J = 8.0$  Hz, 2H) 4.84 (s, 1H), 3.93 (s, 2H)

$^{13}\text{C NMR}$  ( $\text{CDCl}_3$ , 125.8 MHz):  $\delta = 153.9$ , 141.7, 133.6, 130.3, 129.0, 128.6, 126.2, 115.5, 41.2

Characterization data matched that reported in the literature (53).



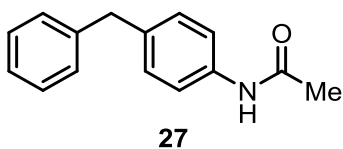

**N-(4-Benzylphenyl)acetamide (27):** obtained as a white solid (107 mg, 96%), Mp = 117-119 °C  
<sup>1</sup>H NMR (CDCl<sub>3</sub>, 500 MHz): δ = 7.40 (d, *J* = 8.5 Hz, 2H), 7.28 (t, *J* = 7.5 Hz, 1H), 7.21-7.13 (m, 5H), 3.94 (s, 2H), 2.16 (s, 3H)  
<sup>13</sup>C NMR (CDCl<sub>3</sub>, 125.8 MHz): (\* denotes minor rotamer) δ = 168.8, 141.0, 137.1, 136.0, 131.7\*, 129.3, 129.0, 128.4, 126.0, 121.5\*, 120.3, 41.3, 24.3  
 IR: ν = 3249, 3186, 3120, 2898, 2362, 1659, 1604, 1552, 1511, 1410, 1322, 1271, 850, 731 cm<sup>-1</sup>  
 HRMS (ESI) *m/z* calc. for C<sub>15</sub>H<sub>16</sub>NO (M+H) 226.1232, found 226.1235

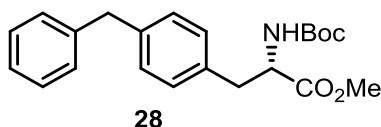

**Methyl (S)-3-(4-Benzylphenyl)-2-((tert-butoxycarbonyl)amino)propanoate (28)** obtained as a yellow oil after purification by preparatory reverse phase high pressure liquid chromatography (19 x 100 mm Waters XBridge Prep BHE130 C18 column, 10% → 90% MeCN/H<sub>2</sub>O, 20 mL/min flow rate) (116 mg, 63%)  
<sup>1</sup>H NMR (CDCl<sub>3</sub>, 500 MHz): δ = 7.30-7.27 (m, 2H), 7.22-7.17 (m, 3H), 7.11 (d, *J* = 8.0 Hz, 2H), 7.04 (d, *J* = 8.0 Hz, 2H), 4.96 (d, *J* = 7.5 Hz, 1H), 4.57 (dd, *J* = 14.0, 6.0 Hz, 1H), 3.95 (s, 2H), 3.71 (s, 3H), 3.10-2.99 (m, 2H), 1.41 (s, 9H)  
<sup>13</sup>C NMR (CDCl<sub>3</sub>, 125.8 MHz): δ = 172.4, 155.2, 141.0, 139.0, 133.8, 129.5, 129.2, 129.0, 128.5, 126.2, 100.0, 79.9, 54.5, 52.2, 41.6, 38.0, 28.4  
 IR: ν = 3363, 2978, 2362, 1745, 1715, 1494, 1366, 1166 cm<sup>-1</sup>  
 HRMS (ESI) *m/z* calc. for C<sub>22</sub>H<sub>27</sub>NO<sub>4</sub>Na (M+Na) 392.1838, found 392.1822  
 Chiral SFC (ChiralPak AD-H column: 10% MeOH in CO<sub>2</sub>, 5.0 mL/min) *t*<sub>r</sub> = 2.017 (major peak)

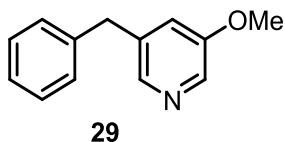

**3-Benzyl-5-methoxypyridine (29):** obtained as a dark yellow oil (74 mg, 75%)  
<sup>1</sup>H NMR (CDCl<sub>3</sub>, 500 MHz): δ = 8.17 (s, 1H), 8.13 (s, 1H), 7.31-7.28 (m, 2H), 7.23-7.17 (m, 3H), 6.97 (s, 1H), 3.96 (s, 2H), 3.80 (s, 3H)  
<sup>13</sup>C NMR (CDCl<sub>3</sub>, 125.8 MHz): δ = 147.9, 145.9, 138.0, 132.3, 130.1, 129.5, 121.2, 120.4 (q, *J* = 257.3 Hz), 118.7, 110.3, 41.1  
 IR: ν = 3027, 2940, 2838, 1586, 1426, 1281, 1184, 1156, 1051, 843, 718, 669 cm<sup>-1</sup>  
 HRMS (ESI) *m/z* calc. for C<sub>13</sub>H<sub>14</sub>NO (M+H) 200.1075, found 200.1066

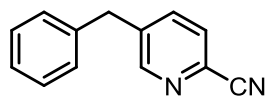

30

**5-Benzylpicolinonitrile (30):** obtained as a colorless oil (87 mg, 90%)

$^1\text{H NMR}$  ( $\text{CDCl}_3$ , 500 MHz):  $\delta$  = 8.60 (s, 1H), 7.60 (m, 2H), 7.33 (dd,  $J$  = 7.0, 7.0 Hz, 2H), 7.27 (m, 1H), 7.16 (d,  $J$  = 7.0 Hz, 2H), 4.06 (s, 2H)

$^{13}\text{C NMR}$  ( $\text{CDCl}_3$ , 125.8 MHz):  $\delta$  = 151.7, 141.1, 138.3, 137.2, 131.8, 129.2, 129.1, 128.4, 127.2, 117.5, 39.2

IR:  $\nu$  = 3027, 2920, 2851, 2362, 2234, 1586, 1566, 1496, 1470, 1454, 1392, 1027, 741, 706  $\text{cm}^{-1}$

HRMS (ESI)  $m/z$  calc. for  $\text{C}_{13}\text{H}_{11}\text{N}_2$  (M+H) 195.0922, found 195.0924

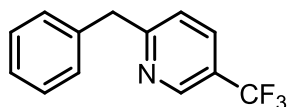

31

**2-Benzyl-5-(trifluoromethyl)pyridine (31):** obtained as a colorless oil (77 mg, 65%)

$^1\text{H NMR}$  ( $\text{CDCl}_3$ , 500 MHz):  $\delta$  = 8.84 (s, 1H), 7.82 (d,  $J$  = 7.0 Hz, 1H), 7.34-7.32 (m, 2H), 7.28-7.24 (m, 4H), 4.25 (s, 2H)

$^{13}\text{C NMR}$  ( $\text{CDCl}_3$ , 125.8 MHz):  $\delta$  = 165.2, 146.5 (d,  $J$  = 3.5 Hz), 138.6, 133.8, 129.3, 129.0, 127.0, 124.6 (q,  $J$  = 33.2), 123.9 (q,  $J$  = 271.9), 122.9, 44.8

$^{19}\text{F NMR}$  ( $\text{CDCl}_3$ , 470.8 MHz):  $\delta$  = -62.3

IR:  $\nu$  = 3030, 2360, 1605, 1495, 1322, 1327, 1124, 1017, 735  $\text{cm}^{-1}$

HRMS (ESI)  $m/z$  calc. for  $\text{C}_{13}\text{H}_{11}\text{F}_3\text{N}$  (M+H) 208.0844, found 208.0842

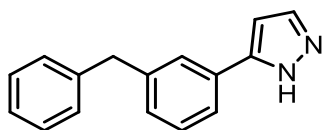

32

**5-(3-Benzylphenyl)-1H-pyrazole (32):** obtained as a white solid (76 mg, 65%), Mp = 78-79  $^{\circ}\text{C}$

$^1\text{H NMR}$  ( $\text{CDCl}_3$ , 500 MHz):  $\delta$  = 11.46 (br s, 1H), 7.63 (s, 1H), 7.60 (d,  $J$  = 8.0 Hz, 1H), 7.54 (d,  $J$  = 2 Hz, 1H), 7.33 (d,  $J$  = 8.0 Hz, 1H), 7.31-7.27 (m, 2H), 7.22-7.19 (m, 3H), 7.16 (d,  $J$  = 7.5 Hz, 2H), 6.58 (d,  $J$  = 1.5 Hz, 1H), 4.01 (s, 2H)

$^{13}\text{C NMR}$  ( $\text{CDCl}_3$ , 125.8 MHz):  $\delta$  = 141.8, 141.0, 133.3, 132.4, 129.10, 129.09, 128.9, 128.7, 126.5, 126.3, 125.9, 123.8, 102.9, 42.1

IR:  $\nu$  = 3166, 3068, 2919, 2850, 1559, 1494, 1472, 1452, 1357, 1052, 822, 771, 706  $\text{cm}^{-1}$

HRMS (ESI)  $m/z$  calc. for  $\text{C}_{16}\text{H}_{15}\text{N}_2$  (M+H) 235.1235, found 235.1235

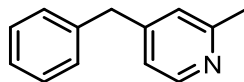

33

**4-Benzyl-2-methylpyridine (33):** obtained as a light yellow oil (52 mg, 57%)

$^1\text{H}$  NMR ( $\text{CDCl}_3$ , 500 MHz):  $\delta$  = 8.38 (d,  $J$  = 5.0 Hz, 1H), 7.32 (m, 2H), 7.25 (m, 1 H), 7.17 (d,  $J$  = 7.0 Hz, 2H), 6.97 (s, 1H), 6.91 (d,  $J$  = 5.0 Hz, 1H), 3.92 (s, 2H), 2.51 (s, 3H)

$^{13}\text{C}$  NMR ( $\text{CDCl}_3$ , 125.8 MHz):  $\delta$  = 158.6, 150.4, 149.3, 139.3, 129.2, 128.8, 126.7, 123.8, 121.5, 41.4, 24.5

IR:  $\nu$  = 3027, 2923, 2358, 1600, 1558, 1495, 1453, 734, 699  $\text{cm}^{-1}$

HRMS (ESI)  $m/z$  calc. for  $\text{C}_{13}\text{H}_{14}\text{N}$  (M+H) 184.1126, found 184.1117

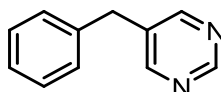

34

**5-Benzylpyrimidine (34):** obtained as yellow crystals (82 mg, 96%), Mp = 45-47 °C

$^1\text{H}$  NMR ( $\text{CDCl}_3$ , 500 MHz):  $\delta$  = 9.07 (s, 1H), 8.57 (s, 2H), 7.33-7.30 (m, 2H) 7.25-7.22 (m, 2H) 7.17-7.15 (m, 2H), 3.95 (s, 2H)

$^{13}\text{C}$  NMR ( $\text{CDCl}_3$ , 125.8 MHz):  $\delta$  = 157.15, 157.08, 138.4, 134.4, 129.1, 128.9, 127.1, 36.7

IR:  $\nu$  = 3032, 2916, 2850, 1560, 1408, 1230, 1100, 987, 924, 749, 729  $\text{cm}^{-1}$

HRMS (ESI)  $m/z$  calc. for  $\text{C}_{11}\text{H}_{11}\text{N}_2$  (M+H) 171.0922, found 171.0919

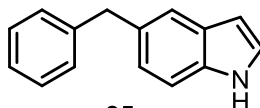

35

**5-Benzyl-1H-indole (35):** obtained in pure form as a white solid (57 mg, 55%), Mp = 40-42 °C, and as a mixture with aryl bromide starting material [30 mg (mass of mixture), 18% (based on  $^1\text{H}$  NMR purity analysis)]

$^1\text{H}$  NMR ( $\text{CDCl}_3$ , 500 MHz):  $\delta$  = 7.99 (br s, 1H), 7.50 (s, 1H), 7.33-7.21 (m, 6H), 7.16 (d,  $J$  = 2.5 Hz, 1H), 7.08 (d,  $J$  = 8.0 Hz, 1H), 6.52 (s, 1H), 4.13 (s, 2H)

$^{13}\text{C}$  NMR ( $\text{CDCl}_3$ , 125.8 MHz):  $\delta$  = 142.3, 134.4, 132.5, 128.9, 128.3, 128.1, 125.8, 124.3, 123.5, 120.6, 110.9, 102.4, 42.0

IR:  $\nu$  = 3401, 2923, 2853, 2358, 1453, 1338, 1090, 1028, 762, 730, 699  $\text{cm}^{-1}$

HRMS (ESI)  $m/z$  calc. for  $\text{C}_{15}\text{H}_{14}\text{N}$  (M+H) 208.1126, found 208.1135

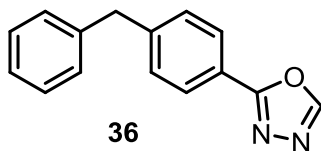

36

**2-(4-Benzylphenyl)-1,3,4-oxadiazole (36):** obtained as a yellow solid (85 mg, 72%), Mp = 71-73 °C

$^1\text{H}$  NMR ( $\text{CDCl}_3$ , 500 MHz):  $\delta$  = 8.43 (s, 1H), 8.00 (d,  $J$  = 8.0 Hz, 2H), 7.34 (d,  $J$  = 8.0 Hz, 2H), 7.32 (d,  $J$  = 7.5 Hz, 2H), 7.25-7.19 (m, 3H), 4.06 (s, 2H)

$^{13}\text{C}$  NMR ( $\text{CDCl}_3$ , 125.8 MHz):  $\delta$  = 164.9, 152.6, 145.8, 140.1, 129.8, 129.1, 128.8, 127.4, 126.6, 121.5, 42.0

IR:  $\nu$  = 2924, 2854, 1614, 1493, 1094, 1065, 865, 712  $\text{cm}^{-1}$

HRMS (ESI)  $m/z$  calc. for  $\text{C}_{15}\text{H}_{13}\text{N}_2\text{O}$  (M+H) 237.1028, found 237.1034

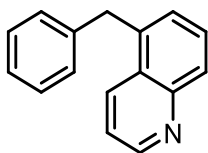

37

**5-Benzylquinoline (37):** obtained as a white solid (64 mg, 58%), Mp = 80-81 °C

$^1\text{H}$  NMR ( $\text{CDCl}_3$ , 500 MHz):  $\delta$  = 8.90 (dd,  $J$  = 4, 1.5 Hz, 1H), 8.30 (d,  $J$  = 8.5 Hz, 1H), 8.04 (d,  $J$  = 8.5 Hz, 1H), 7.67 (dd,  $J$  = 8.4, 7.2 Hz, 1H), 7.61-7.24 (m, 4H), 7.13 (m, 3H), 4.45 (s, 2H)

$^{13}\text{C}$  NMR ( $\text{CDCl}_3$ , 125.8 MHz):  $\delta$  = 149.9, 148.8, 140.0, 137.0, 132.5, 129.1, 128.5, 127.7, 127.1, 126.2, 120.8, 38.4

Characterization data matched that reported in the literature (52).

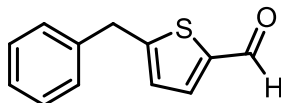

38

**5-Benzylthiophene-2-carbaldehyde (38):** obtained as a colorless oil (55 mg, 54%)

$^1\text{H}$  NMR ( $\text{CDCl}_3$ , 500 MHz):  $\delta$  = 9.81 (s, 1H), 7.60 (d,  $J$  = 3.5 Hz, 1H), 7.35-7.32 (m, 2H), 7.28-7.24 (m, 3H), 6.90 (d,  $J$  = 3.5 Hz, 1H), 4.19 (s, 2H)

$^{13}\text{C}$  NMR ( $\text{CDCl}_3$ , 125.8 MHz):  $\delta$  = 182.8, 155.9, 142.6, 138.9, 137.0, 129.0, 128.8, 127.2, 126.8, 37.0

Characterization data matched that reported in the literature (53).

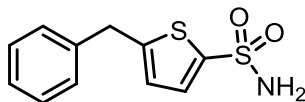

39

**5-Benzylthiophene-2-sulfonamide (39):** obtained as a white solid (71 mg, 56%), Mp = 89-90 °C

$^1\text{H}$  NMR ( $\text{CDCl}_3$ , 500 MHz):  $\delta$  = 7.78 (d,  $J$  = 3.5 Hz, 1H), 7.34 (m, 2H), 7.29-7.23 (m, 3H), 6.76 (d,  $J$  = 3.5 Hz, 1H), 4.93 (s, 2H), 4.15 (s, 2H)

$^{13}\text{C}$  NMR ( $\text{CDCl}_3$ , 125.8 MHz):  $\delta$  = 152.1, 140.8, 138.9, 132.1, 129.0, 128.8, 127.3, 125.5, 36.5

IR:  $\nu$  = 3382, 3276, 3109, 2918, 1566, 1443, 1330, 1163, 1142, 1020, 908, 704  $\text{cm}^{-1}$

HRMS (ESI)  $m/z$  calc. for  $\text{C}_{11}\text{H}_{10}\text{NO}_2\text{S}_2$  (M-H) 252.0153, found 252.0164

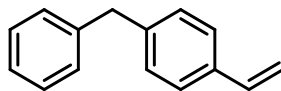

40

**1-Benzyl-4-vinylbenzene (40):** obtained as a colorless oil (59 mg, 61%)

$^1\text{H NMR}$  ( $\text{CDCl}_3$ , 500 MHz):  $\delta = 7.38\text{--}7.27$  (m, 4H), 7.23–7.18 (m, 5H), 6.73 (dd,  $J = 17.5$ , 11.0 Hz, 1H), 5.74 (d,  $J = 17.5$ , 1H), 5.23 (d,  $J = 11.0$ , 1H), 4.01 (s, 2H)

$^{13}\text{C NMR}$  ( $\text{CDCl}_3$ , 125.8 MHz):  $\delta = 140.9$ , 140.7, 136.5, 135.5, 129.0, 128.8, 128.4, 126.3, 126.0, 113.1, 41.6

Characterization data matched that reported in the literature (51).

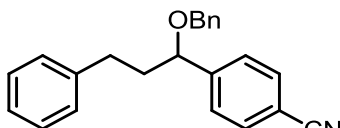

42

**4-(1-(benzyloxy)-3-phenylpropyl)benzonitrile (42):** prepared using the general procedure for primary benzyl cross-couplings, obtained as a colorless oil (106 mg, 65%)

$^1\text{H NMR}$  ( $\text{CDCl}_3$ , 500 MHz):  $\delta = 7.67$  (d,  $J = 8.0$  Hz, 2H), 7.46 (d,  $J = 8.0$  Hz, 2H), 7.40–7.37 (m, 2H), 7.34–7.32 (m, 3H), 7.30–7.26 (m, 2H), 7.22–7.18 (m, 1H), 7.14 (d,  $J = 7.5$  Hz, 2H), 4.46 (d,  $J = 11.5$  Hz, 1H), 4.38 (dd,  $J = 8.5$ , 4.5 Hz, 1H), 4.29 (d,  $J = 11.5$  Hz, 1H), 2.83–2.77 (m, 1H), 2.72–2.67 (m, 1H), 2.19–2.14 (m, 1H), 1.97–1.92 (m, 1H)

$^{13}\text{C NMR}$  ( $\text{CDCl}_3$ , 125.8 MHz):  $\delta = 148.2$ , 141.3, 137.9, 132.4, 128.5, 128.40, 128.38, 127.78, 127.76, 127.3, 125.9, 118.8, 111.4, 79.8, 71.0, 39.8, 31.8

IR:  $\nu = 3028$ , 2924, 2228, 1607, 1496, 1094, 853, 698, 737  $\text{cm}^{-1}$

HRMS (ESI)  $m/z$  calc. 328.1701 for (M+H), found 328.1709

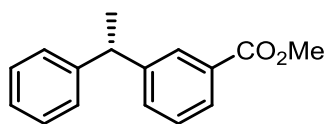

45

**Methyl 3-(1-Phenylethyl)benzoate (45):** obtained as a colorless oil (62 mg, 52%)

$^1\text{H NMR}$  ( $\text{CDCl}_3$ , 500 MHz):  $\delta = 7.96$  (m, 1H), 7.87 (m, 1H), 7.41–7.28 (m, 4H), 7.22–7.18 (m, 3H), 4.21 (q,  $J = 7.5$  Hz, 1H), 3.90 (s, 3H), 1.67 (d,  $J = 7.5$  Hz, 3H)

$^{13}\text{C NMR}$  ( $\text{CDCl}_3$ , 125.8 MHz):  $\delta = 167.4$ , 146.9, 145.9, 132.5, 130.4, 128.8, 128.64, 128.61, 127.7, 127.6, 126.4, 52.2, 44.8, 21.9

$[\alpha_D]^{25} = -4.4$  ( $\text{CDCl}_3$ ,  $c = 1.0$  mg/mL)

Chiral SFC (ChiralPak OJ-H column: 5% iPrOH in  $\text{CO}_2$ , 2.0 mL/min)  $t_r = 8.37$  (minor peak)  $t_r = 9.17$  (major peak) Absolute configuration of the major enantiomer was assigned as (*S*) based on literature data (54).

Characterization data matched that reported in the literature (54).

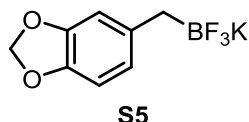

**Potassium (Benzo[d][1,3]dioxol-5-ylmethyl)trifluoroborate (S5):** prepared following general procedure A, obtained as a white solid (498 mg, 41%), Mp = 258 °C (dec.)

<sup>1</sup>H NMR (acetone-d<sub>6</sub>, 500 MHz): δ = 6.65 (s, 1H), 6.54-6.50 (m, 2H), 5.79 (s, 2H), 1.55 (br s, 2H)

<sup>13</sup>C NMR (DMSO-d<sub>6</sub>, 125.8 MHz): δ = 146.8, 143.1, 141.2, 121.2, 109.8, 107.7, 100.3

<sup>19</sup>F NMR (acetone-d<sub>6</sub>, 282.4 MHz): δ = -136.3 (q, *J* = 70.6 Hz)

<sup>11</sup>B NMR (acetone-d<sub>6</sub>, 128.4 MHz): δ = 4.12 (q, *J* = 50.2 Hz)

IR: ν = 3067, 1482, 1436, 1230, 1040, 960, 775, 630 cm<sup>-1</sup>

HRMS (ESI) m/z calc. for C<sub>8</sub>H<sub>7</sub>O<sub>2</sub>BF<sub>3</sub> (M<sup>-</sup>) 203.0491, found 203.0486

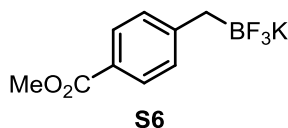

**Potassium Trifluoro(4-(methoxycarbonyl)benzyl)borate (S6):** prepared following general procedure B, obtained as a white solid (706 mg, 55%), Mp = 205 °C (dec.)

<sup>1</sup>H NMR (acetone-d<sub>6</sub>, 500 MHz): δ = 7.73 (d, *J* = 8.0 Hz, 2H), 7.18 (d, *J* = 8.0 Hz, 2H), 3.81 (s, 3H), 1.75 (br s, 2H)

<sup>13</sup>C NMR (acetone-d<sub>6</sub>, 125.8 MHz): δ = 166.9, 153.7, 128.5, 128.3, 124.3, 50.7

<sup>19</sup>F NMR (acetone-d<sub>6</sub>, 470.8 MHz): δ = -140.7 (q, *J* = 55.6 Hz)

<sup>11</sup>B NMR (acetone-d<sub>6</sub>, 128.4 MHz): δ = 4.70 (q, *J* = 57.9 Hz)

IR: ν = 3038, 1690, 1607, 1444, 1293, 1233, 1056, 993, 959, 782, 720, 642

HRMS: (ESI) m/z calc. for C<sub>9</sub>H<sub>9</sub>O<sub>2</sub>BF<sub>3</sub> (M<sup>-</sup>) 217.0648, found 217.0647

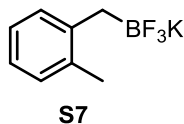

**Potassium Trifluoro(2-methylbenzyl)borate (S7):** prepared following general procedure A, obtained as a white solid (850 mg, 80%), Mp = 230 °C (dec.)

<sup>1</sup>H NMR (acetone-d<sub>6</sub>, 500 MHz): δ = 7.05 (d, *J* = 8.0 Hz, 1H), 6.93 (d, *J* = 7.5 Hz, 1H), 6.90-6.87 (m, 1H), 6.81-6.78 (m, 1H), 2.24 (s, 3H), 1.66 (br s, 2H)

<sup>13</sup>C NMR (acetone-d<sub>6</sub>, 125.8 MHz): δ = 145.0, 135.3, 129.4, 129.0, 124.8, 122.5, 19.9

<sup>19</sup>F NMR (acetone-d<sub>6</sub>, 470.8 MHz): δ = -138.3

<sup>11</sup>B NMR (acetone-d<sub>6</sub>, 128.4 MHz): δ = 5.27 (q, *J* = 51.0 Hz)

IR: ν = 2941, 1488, 1228, 1049, 975, 781, 734, 636 cm<sup>-1</sup>

HRMS (ESI) m/z calc. for C<sub>8</sub>H<sub>9</sub>BF<sub>3</sub> (M<sup>-</sup>) 173.0749, found 173.0753

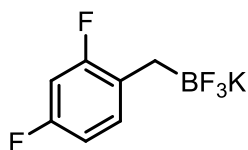

**S8**

**Potassium (2,4-Difluorobenzyl)trifluoroborate (S8):** prepared following general procedure A, obtained as a white solid (422 mg, 36%), Mp = 225-227 °C

<sup>1</sup>H NMR (acetone-d<sub>6</sub>, 500 MHz): δ = 7.23 (q, *J* = 7.5 Hz, 1H), 6.70-6.66 (m, 2H), 1.59 (br s, 2H)

<sup>13</sup>C NMR (acetone-d<sub>6</sub>, 125.8 MHz): δ = 160.7 (dd, *J* = 131, 11 Hz), 158.8 (dd, *J* = 129, 11 Hz), 131.7 (t, *J* = 8 Hz), 128.0 (d, *J* = 17 Hz), 109.7 (dd, *J* = 20, 3 Hz), 102.0 (dd, *J* = 28, 25 Hz), 18.5

<sup>19</sup>F NMR (acetone-d<sub>6</sub>, 470.8 MHz): δ = -114.9, -119.4, -139.9

<sup>11</sup>B NMR (acetone-d<sub>6</sub>, 128.4 MHz): δ = 4.98

IR: ν = 2928, 1622, 1601, 1504, 1253, 1087, 1071, 986, 949, 846 cm<sup>-1</sup>

HRMS (ESI) *m/z* calc. for C<sub>7</sub>H<sub>5</sub>BF<sub>5</sub> (M<sup>-</sup>) 195.0404, found 195.0402

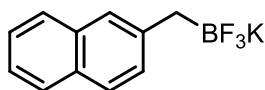

**S9**

**Potassium Trifluoro(naphthalen-2-ylmethyl)borate (S9):** prepared following general procedure A, obtained as a white solid (323 mg, 26%), Mp: 199-202 °C

<sup>1</sup>H NMR (acetone-d<sub>6</sub>, 500 MHz): δ = 7.70 (d, *J* = 8.1 Hz, 1H), 7.65 (d, *J* = 8.2 Hz, 1H), 7.57 (d, *J* = 8.4 Hz, 1H), 7.49 (s, 1H), 7.38 (d, *J* = 8.5 Hz, 1H), 7.35-7.28 (m, 1H), 7.27-7.21 (m, 1H), 1.81 (br s, 2H)

<sup>13</sup>C NMR (acetone-d<sub>6</sub>, 125.8 MHz): δ = 144.0, 134.0, 130.9, 129.4, 127.3, 126.8, 126.3, 125.4, 124.9, 123.3

<sup>19</sup>F NMR (acetone-d<sub>6</sub>, 470.8 MHz): δ = -139.1

<sup>11</sup>B NMR (acetone-d<sub>6</sub>, 128.4 MHz): δ = 5.34

IR: ν = 3054, 2891, 1631, 1597, 1505, 1239, 1074, 953, 746

HRMS (ESI) *m/z* calc. for C<sub>11</sub>H<sub>9</sub>BF<sub>3</sub> (M<sup>-</sup>) 209.0749, found 209.0749

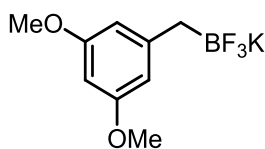

**S10**

**Potassium (3,5-Dimethoxybenzyl)trifluoroborate (S10):** prepared following general procedure A, obtained as a white solid (809 mg, 63%), Mp: 220-222 °C

<sup>1</sup>H NMR (DMSO-d<sub>6</sub>, 500 MHz): δ = 6.16 (s, 2H), 6.02 (s, 1H), 3.64 (s, 6H), 1.40 (br s, 2H)

<sup>13</sup>C NMR (DMSO-d<sub>6</sub>, 125.8 MHz): δ = 159.4, 149.3, 106.7, 94.5, 54.6

<sup>19</sup>F NMR (DMSO-d<sub>6</sub>, 470.8 MHz): δ = -136.3

$^{11}\text{B}$  NMR (DMSO- $d_6$ , 128.4 MHz):  $\delta = 4.20$

IR:  $\nu = 2837, 1614, 1588, 1315, 1240, 1156, 1147, 1068, 978, 934\text{ cm}^{-1}$

HRMS (ESI)  $m/z$  calc. for  $\text{C}_9\text{H}_{11}\text{BF}_3\text{O}_2$  (M $^-$ ) 219.0804, found 219.0812

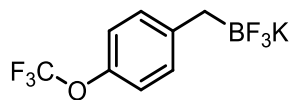

**S11**

**Potassium (3,5-Dimethoxybenzyl)trifluoroborate (S11):** reaction performed on 3 mmol scale according to general procedure A, obtained as a white solid (466 mg, 55%), Mp = 165-168 °C

$^1\text{H}$  NMR (acetone- $d_6$ , 500 MHz):  $\delta = 7.16$  (d,  $J = 8.5$  Hz, 2H), 6.97 (d,  $J = 8.0$  Hz, 2H), 1.66 (br s, 2H)

$^{13}\text{C}$  NMR (acetone- $d_6$ , 125.8 MHz):  $\delta = 146.7, 145.0, 130.0, 120.9$  (q,  $J = 253$  Hz), 119.8

$^{19}\text{F}$  NMR (acetone- $d_6$ , 470.8 MHz):  $\delta = -59.0, -141.0$  (q,  $J = 62$  Hz)

$^{11}\text{B}$  NMR (acetone- $d_6$ , 128.4 MHz):  $\delta = 4.88$

Characterization data matched that reported in the literature (38).

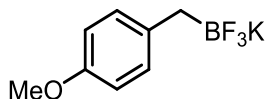

**S12**

**Potassium Trifluoro(4-methoxybenzyl)borate (S12):** prepared following general procedure A, obtained as a white solid (403 mg, 35%), Mp = 162-165 °C

$^1\text{H}$  NMR (acetone- $d_6$ , 500 MHz):  $\delta = 7.01$  (d,  $J = 8.0$  Hz, 2H), 6.64 (d,  $J = 8.0$  Hz, 2H), 3.68 (s, 3H), 1.56 (br s, 2H)

$^{13}\text{C}$  NMR (acetone- $d_6$ , 125.8 MHz):  $\delta = 156.4, 138.0, 129.8, 113.3, 54.9$

$^{19}\text{F}$  NMR (acetone- $d_6$ , 470.8 MHz):  $\delta = -140.7$  (q,  $J = 58.9$  Hz)

$^{11}\text{B}$  NMR (acetone- $d_6$ , 128.4 MHz):  $\delta = 5.14$

Characterization data matched that reported in the literature (28).



$^1\text{H}$  NMR ( $\text{CDCl}_3$ , 500 MHz) spectrum of 4-benzylbenzonitrile (**12**)

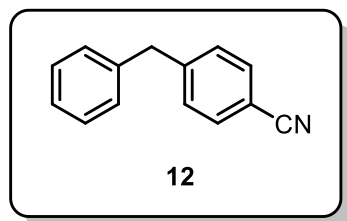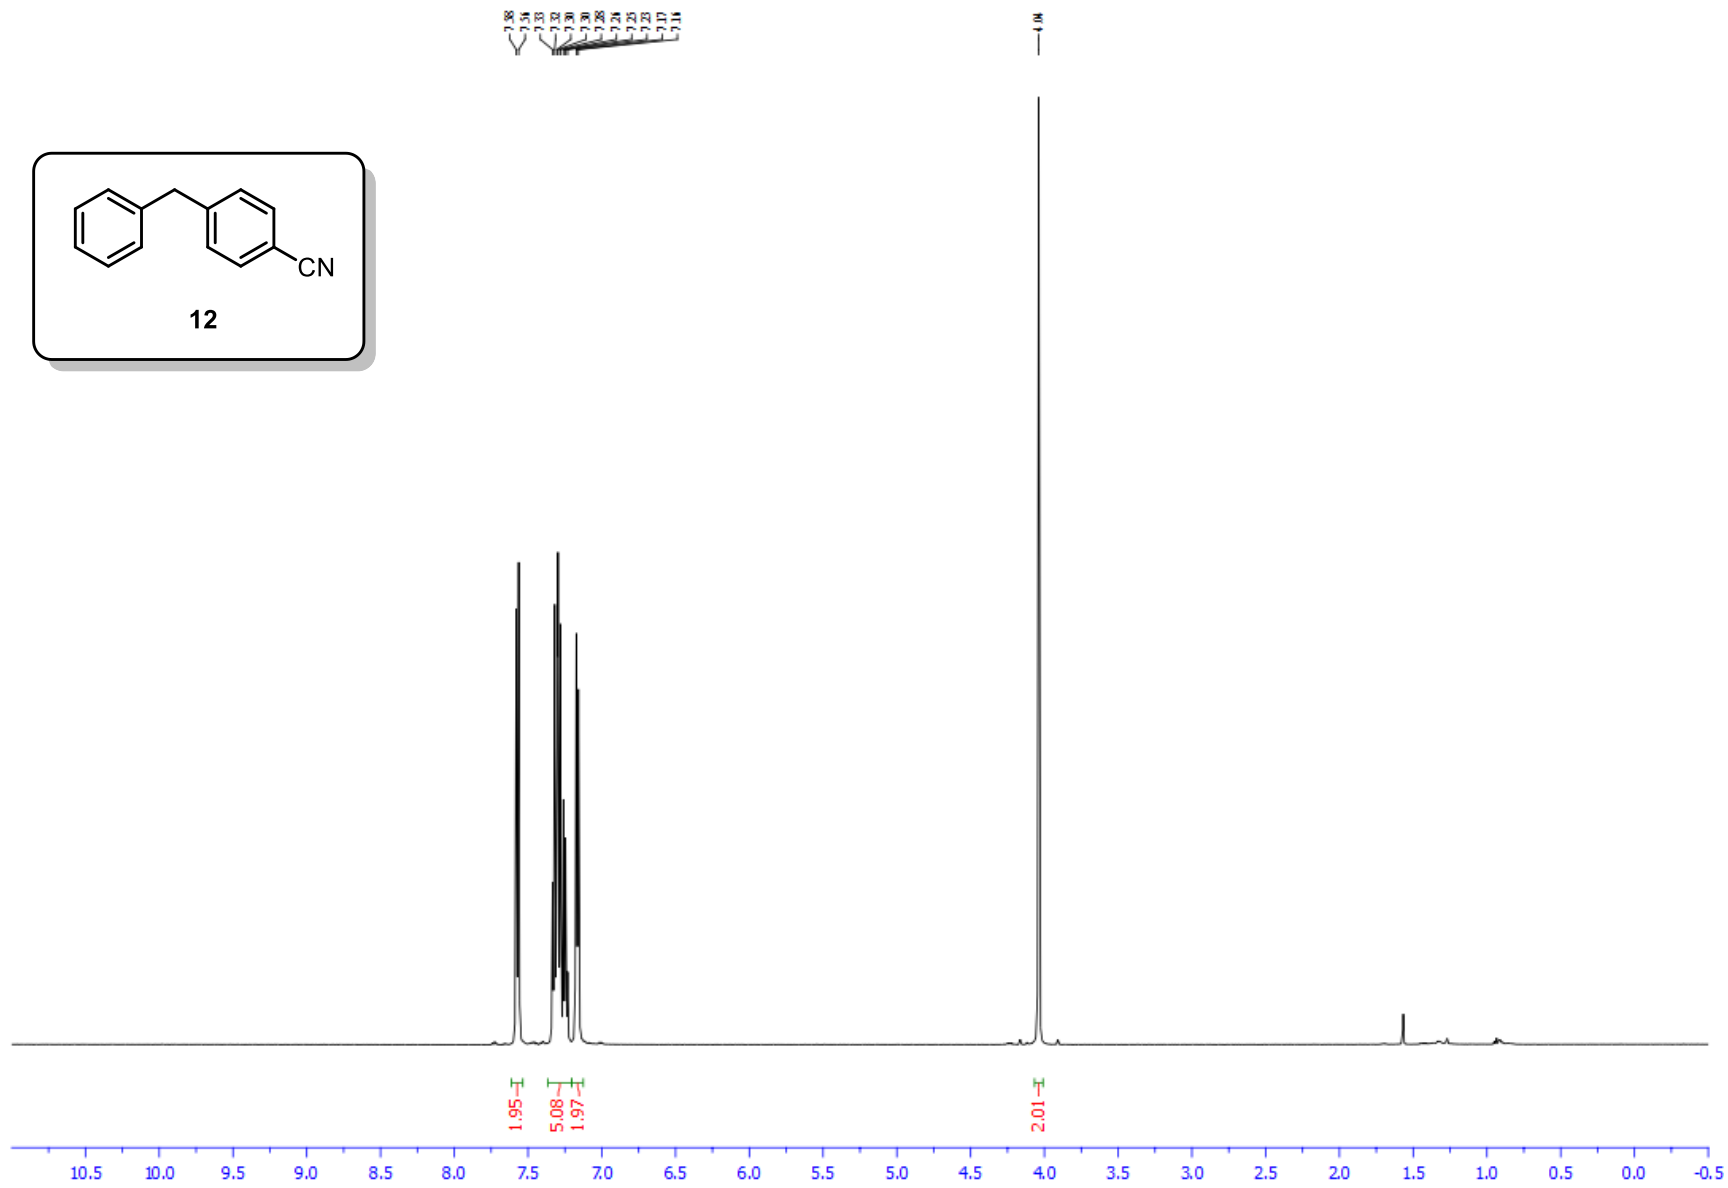

$^{13}\text{C}$  NMR ( $\text{CDCl}_3$ , 125.8 MHz) spectrum of 4-benzylbenzonitrile (**12**)

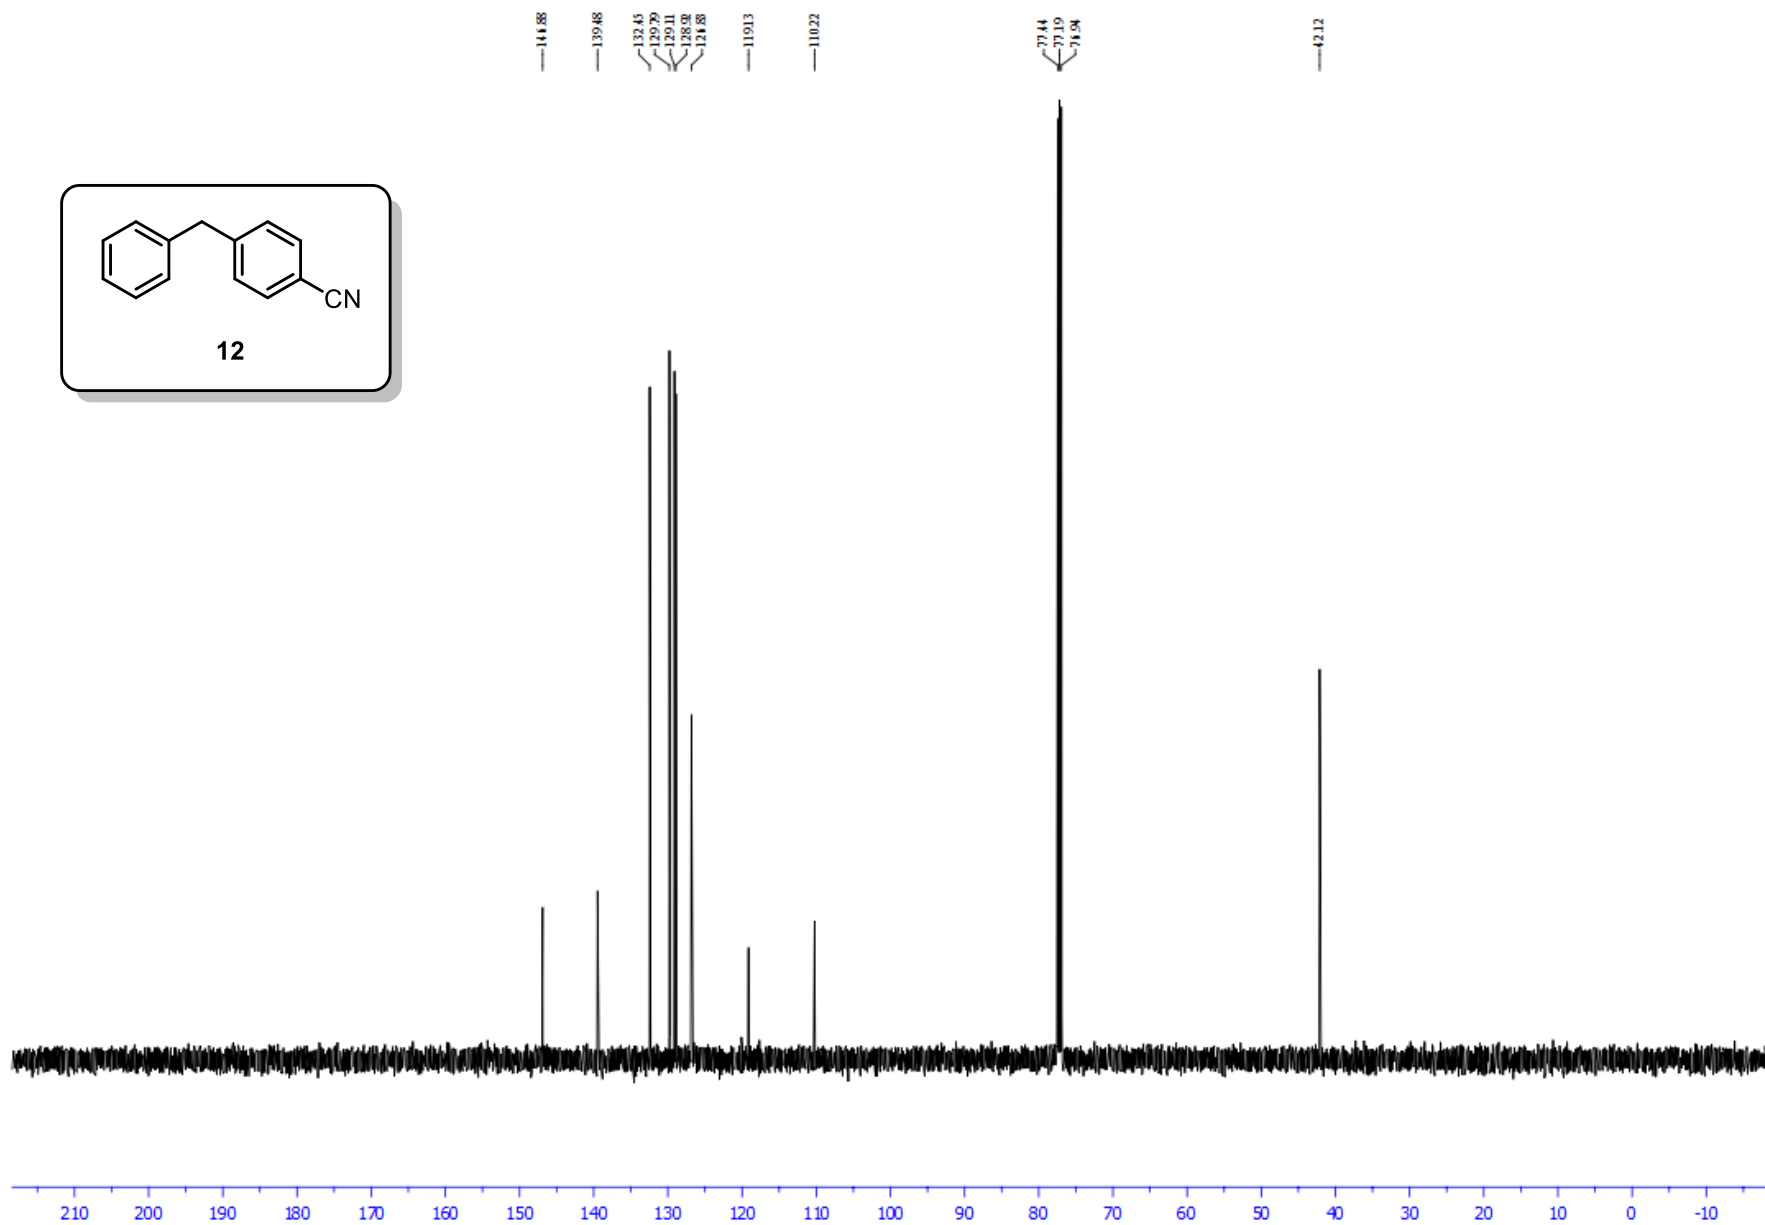

$^1\text{H}$  NMR ( $\text{CDCl}_3$ , 500 MHz) spectrum of 4-(2-methylbenzyl)benzonitrile (**13**)

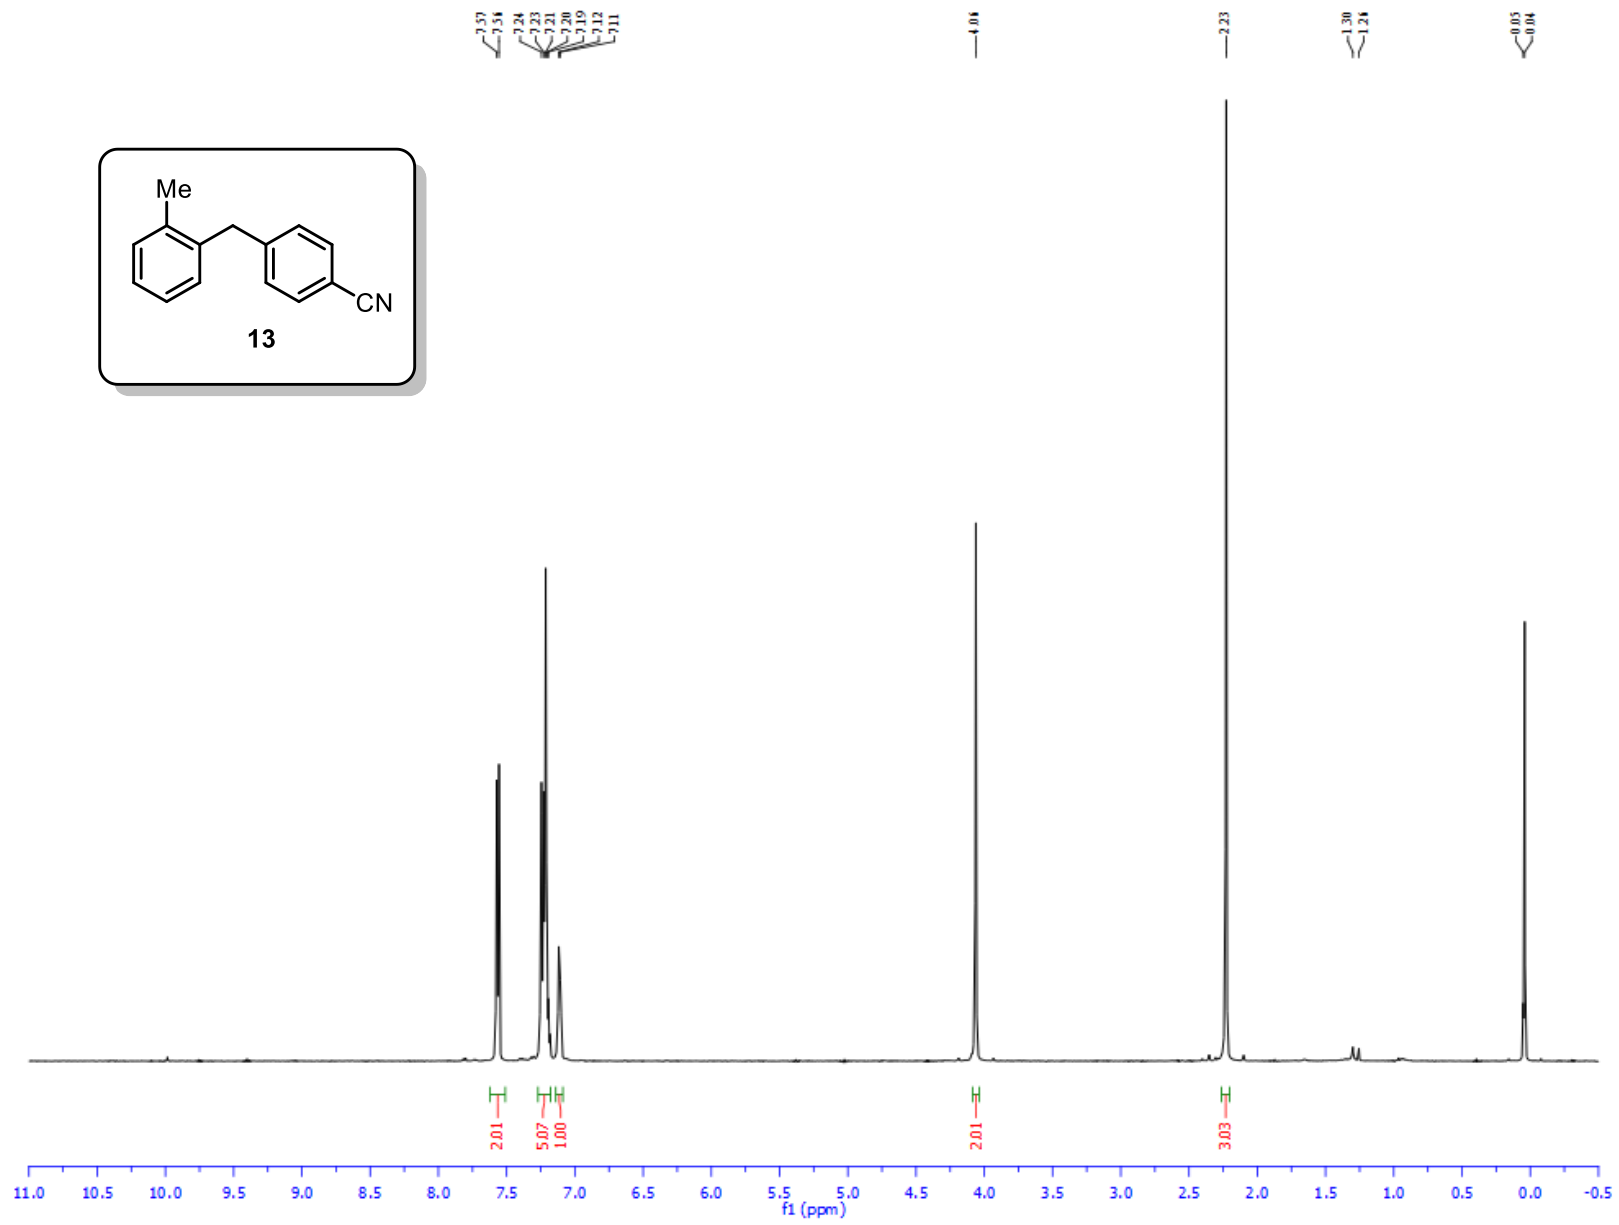

$^{13}\text{C}$  NMR ( $\text{CDCl}_3$ , 125.8 MHz) spectrum of 4-(2-methylbenzyl)benzonitrile (**13**)

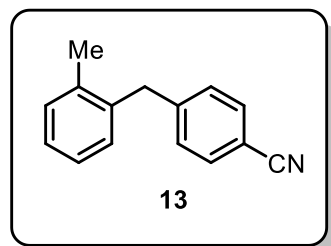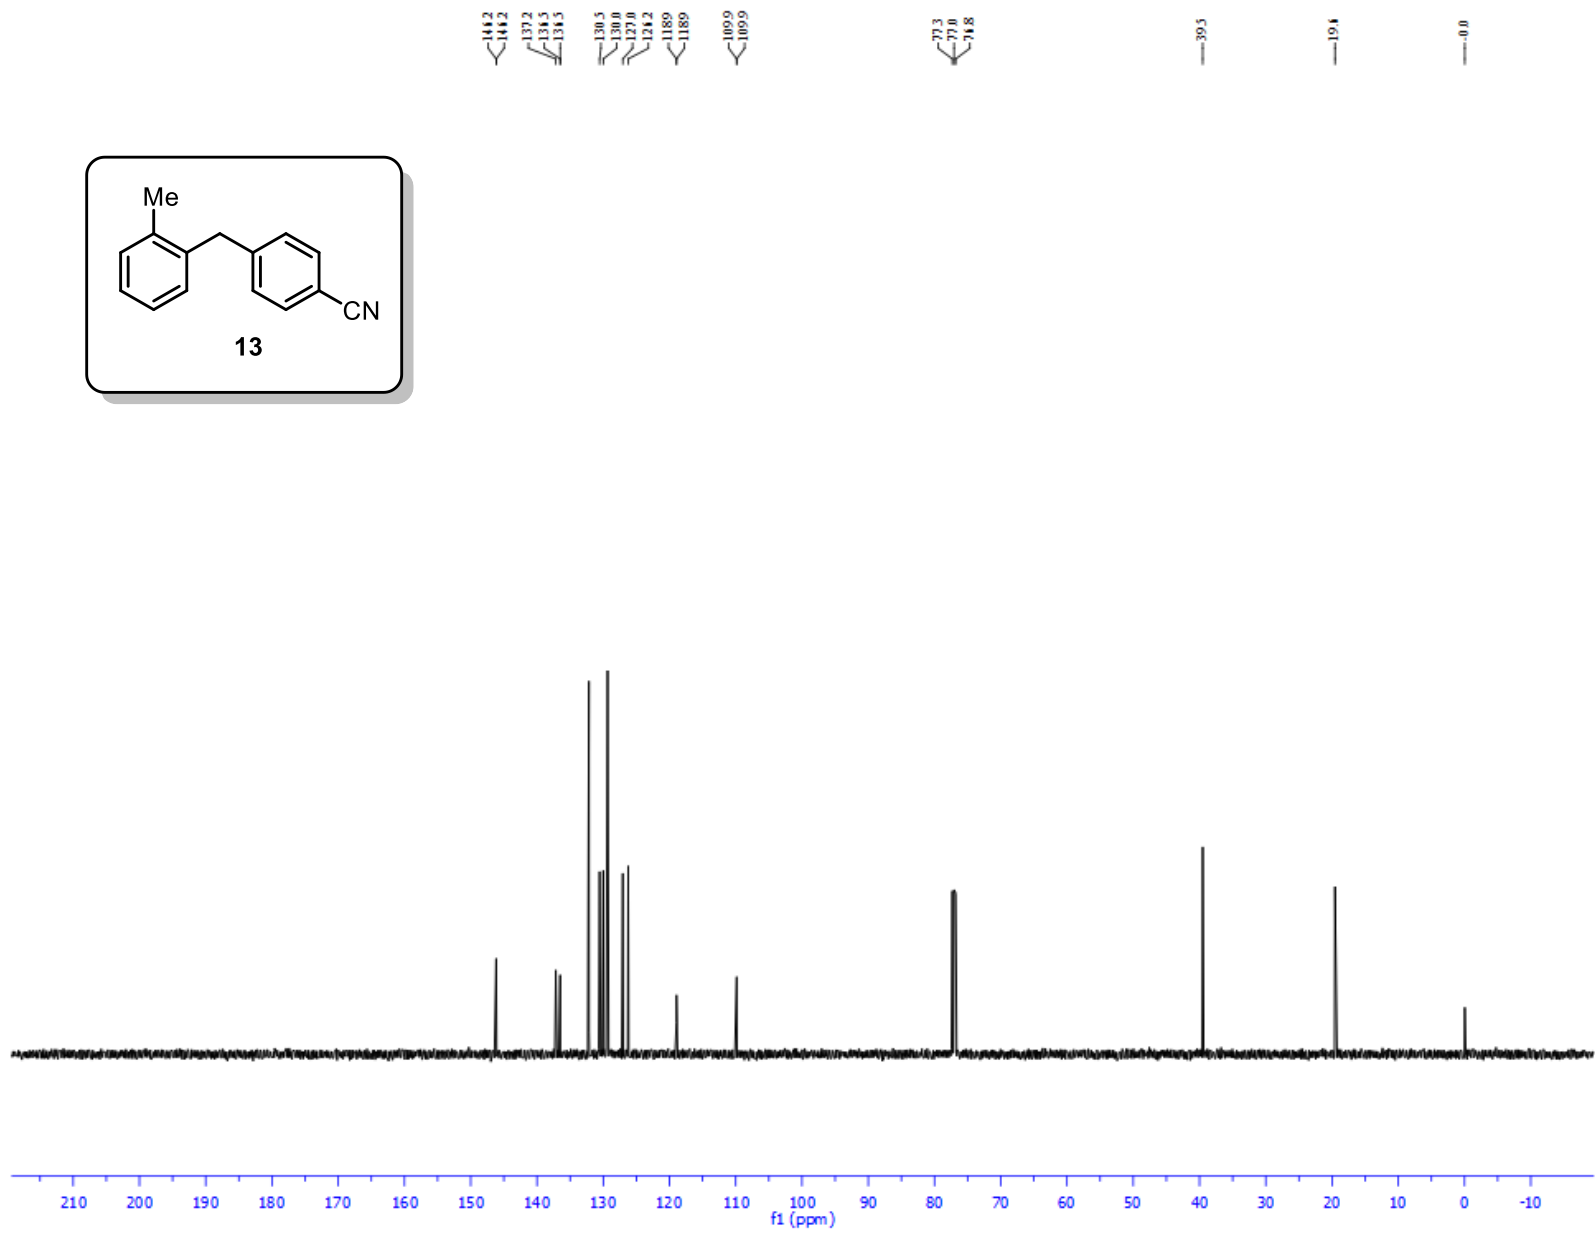

$^1\text{H}$  NMR ( $\text{CDCl}_3$ , 500 MHz) spectrum of 4-(naphthalen-2-ylmethyl)benzonitrile (**14**)

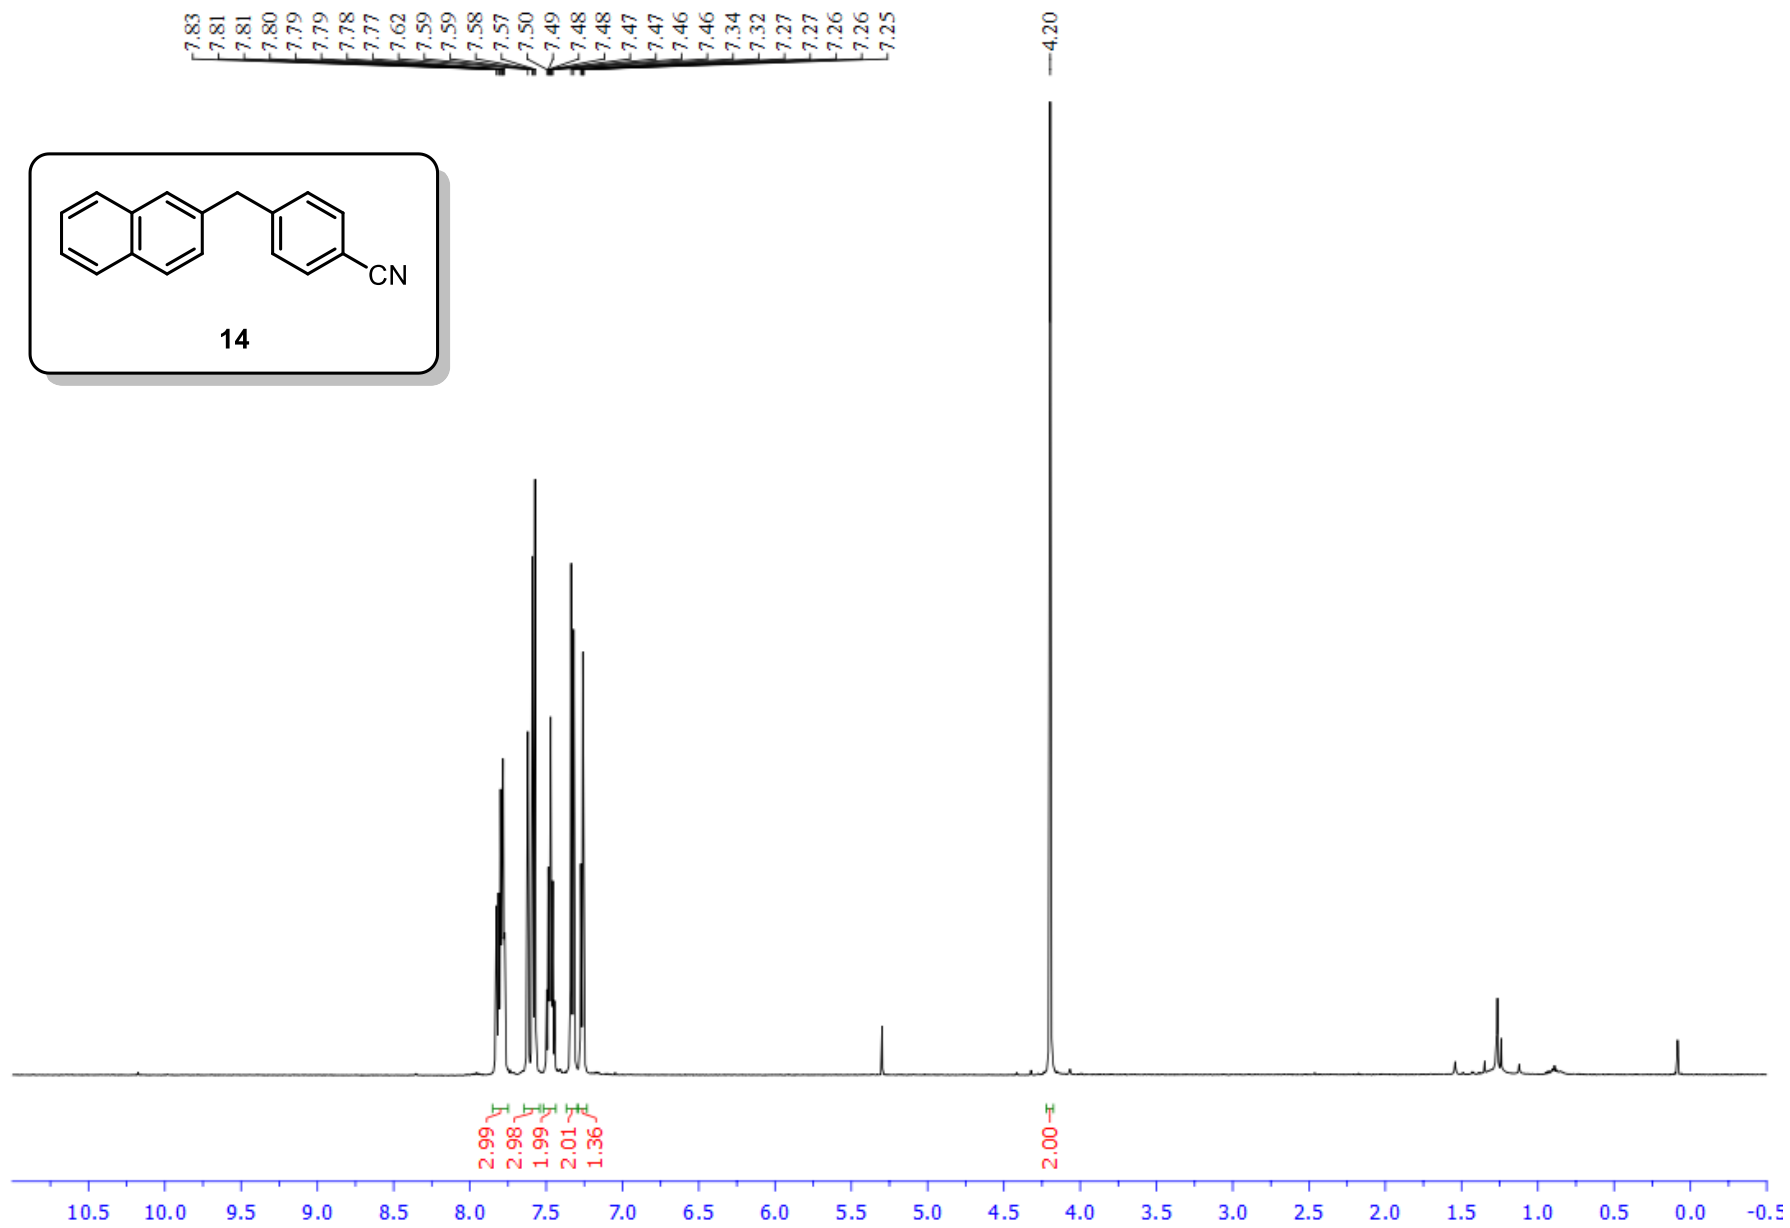

$^{13}\text{C}$  NMR ( $\text{CDCl}_3$ , 125.8 MHz) spectrum of 4-(naphthalen-2-ylmethyl)benzonitrile (**14**)

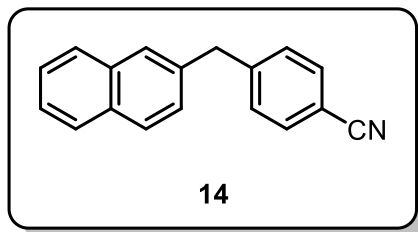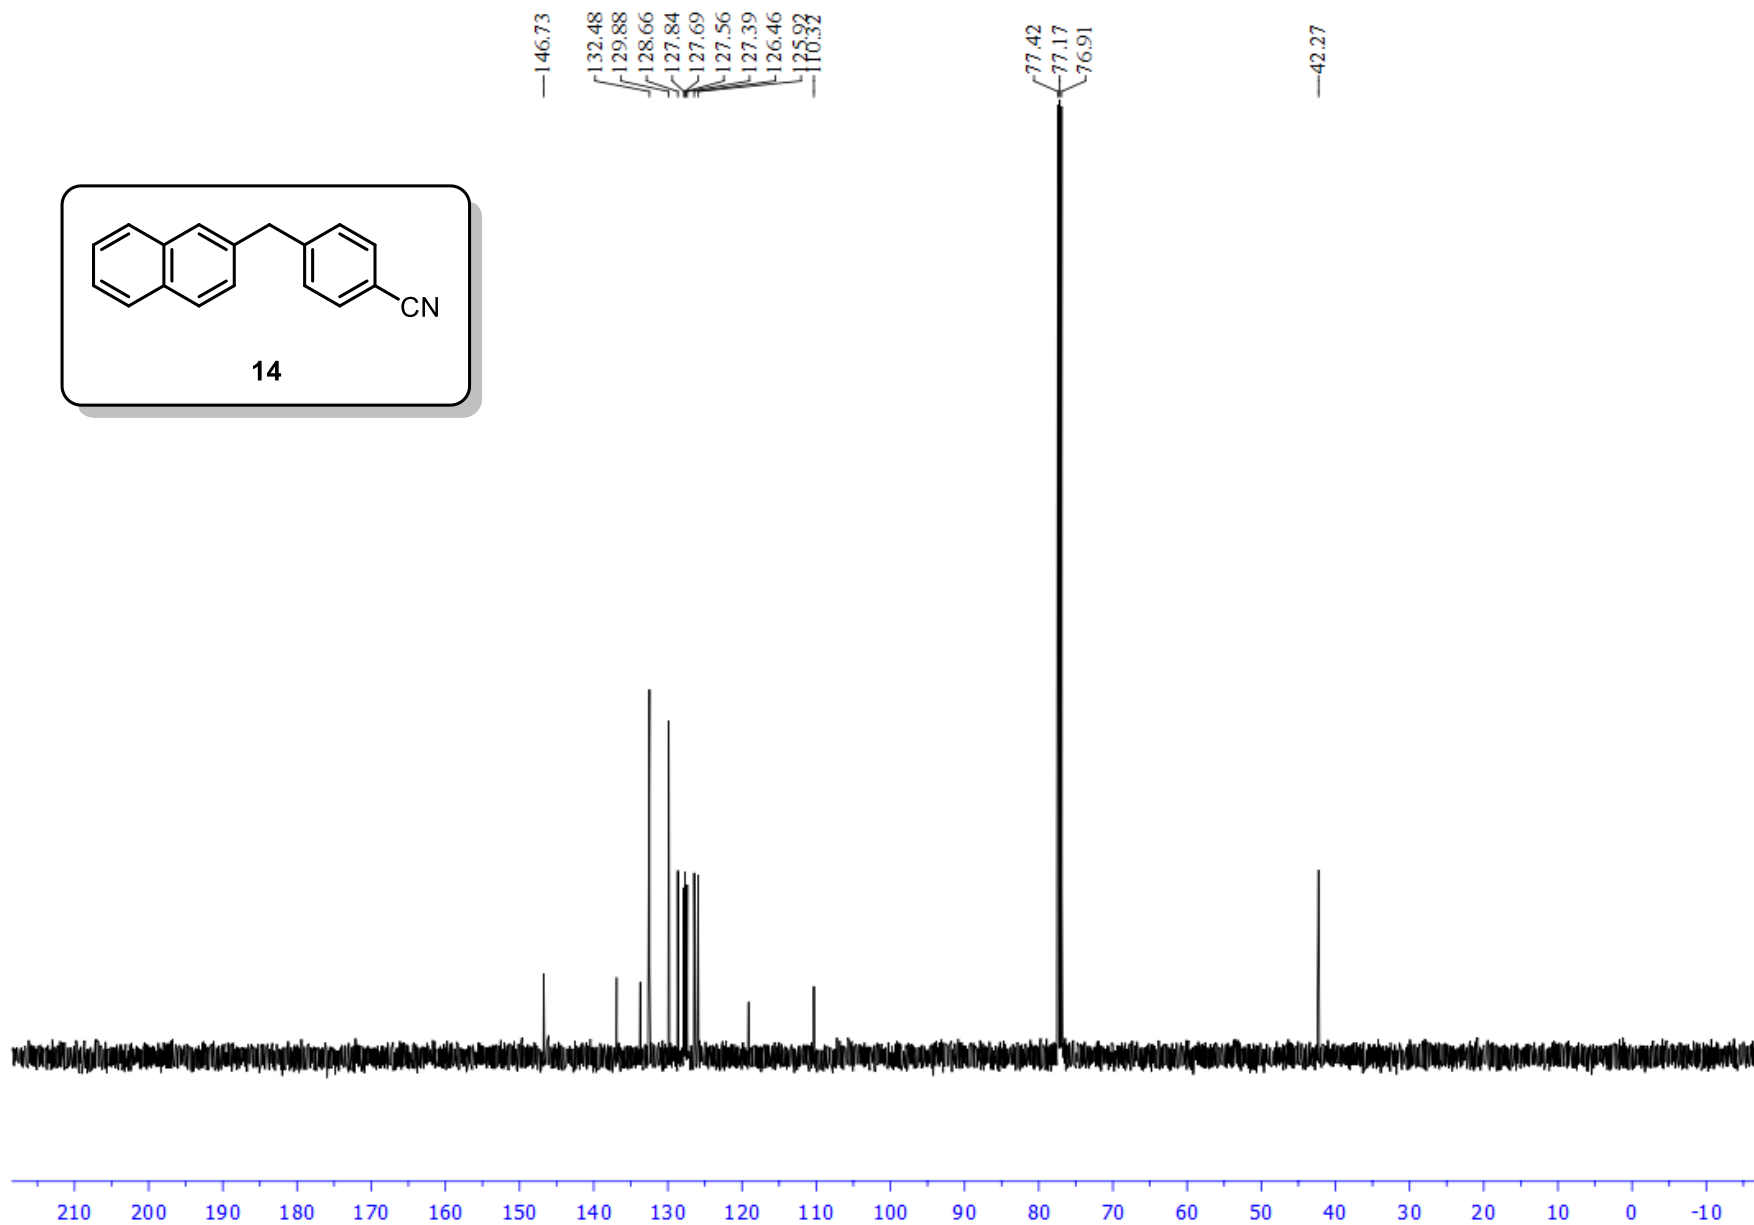

$^1\text{H}$  NMR ( $\text{CDCl}_3$ , 500 MHz) spectrum of 4-(2,4-difluorobenzyl)benzonitrile (**15**)

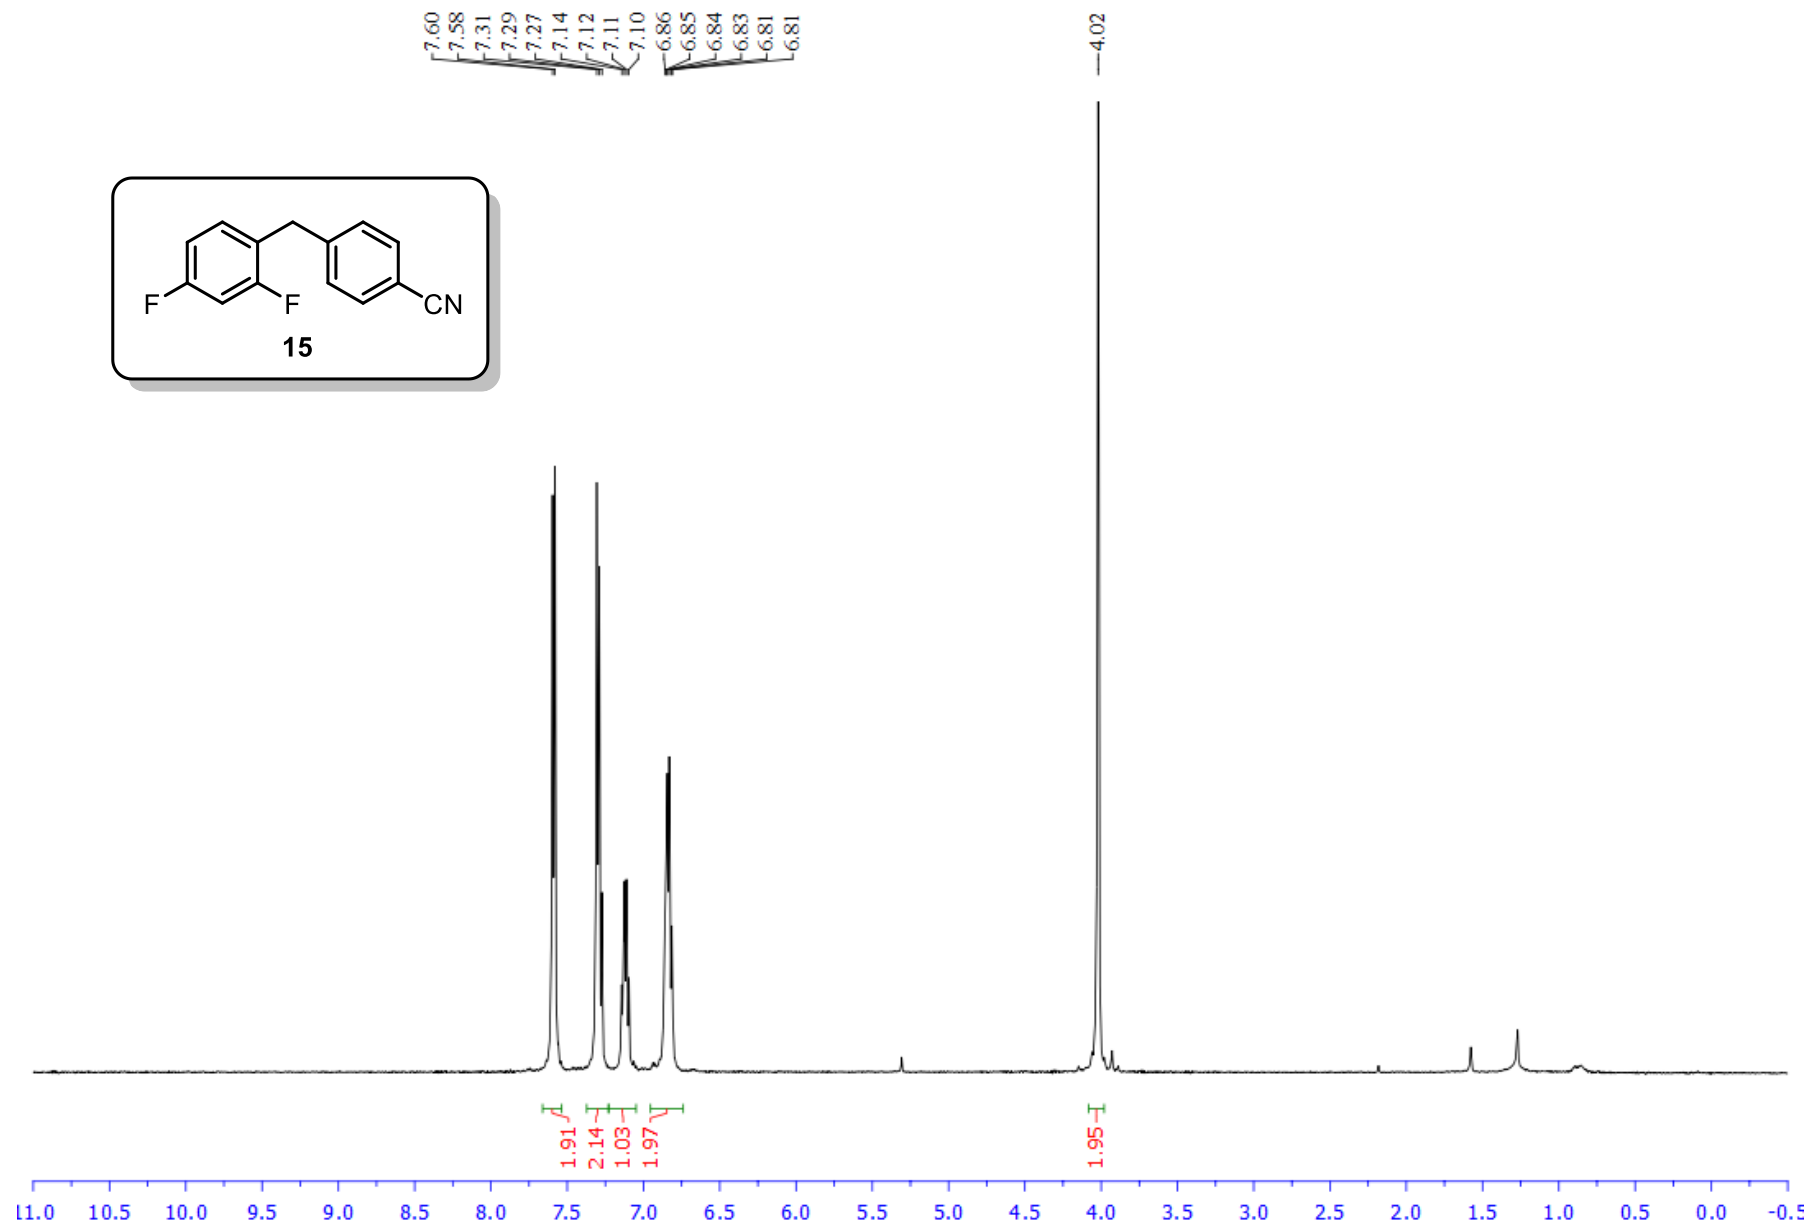

$^{13}\text{C}$  NMR ( $\text{CDCl}_3$ , 125.8 MHz) spectrum of 4-(2,4-difluorobenzyl)benzonitrile (**15**)

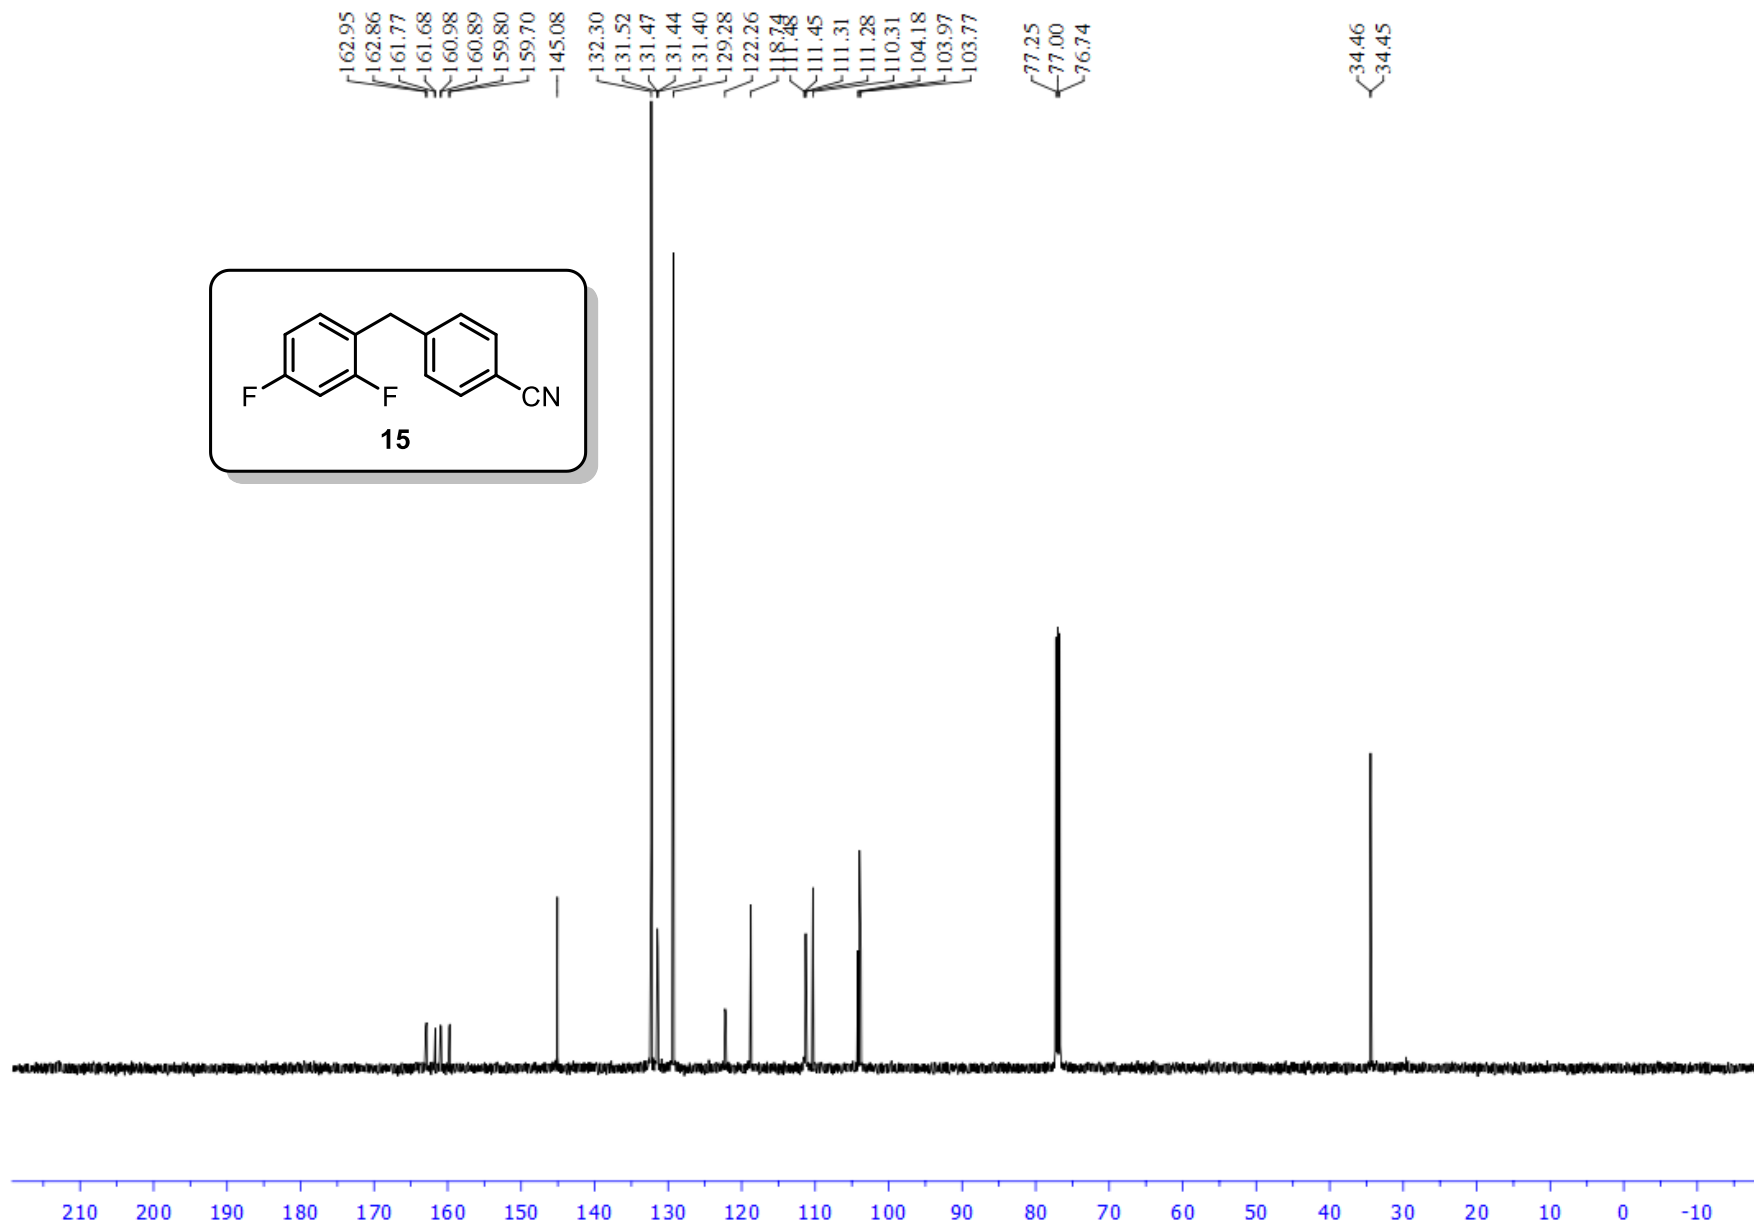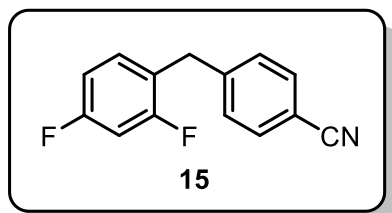



$^{19}\text{F}$  NMR ( $\text{CDCl}_3$ , 470.8 MHz) spectrum of 4-(2,4-difluorobenzyl)benzonitrile (**15**)

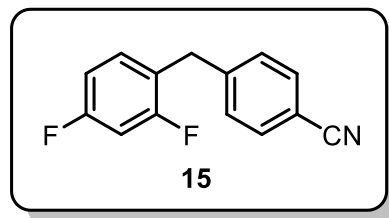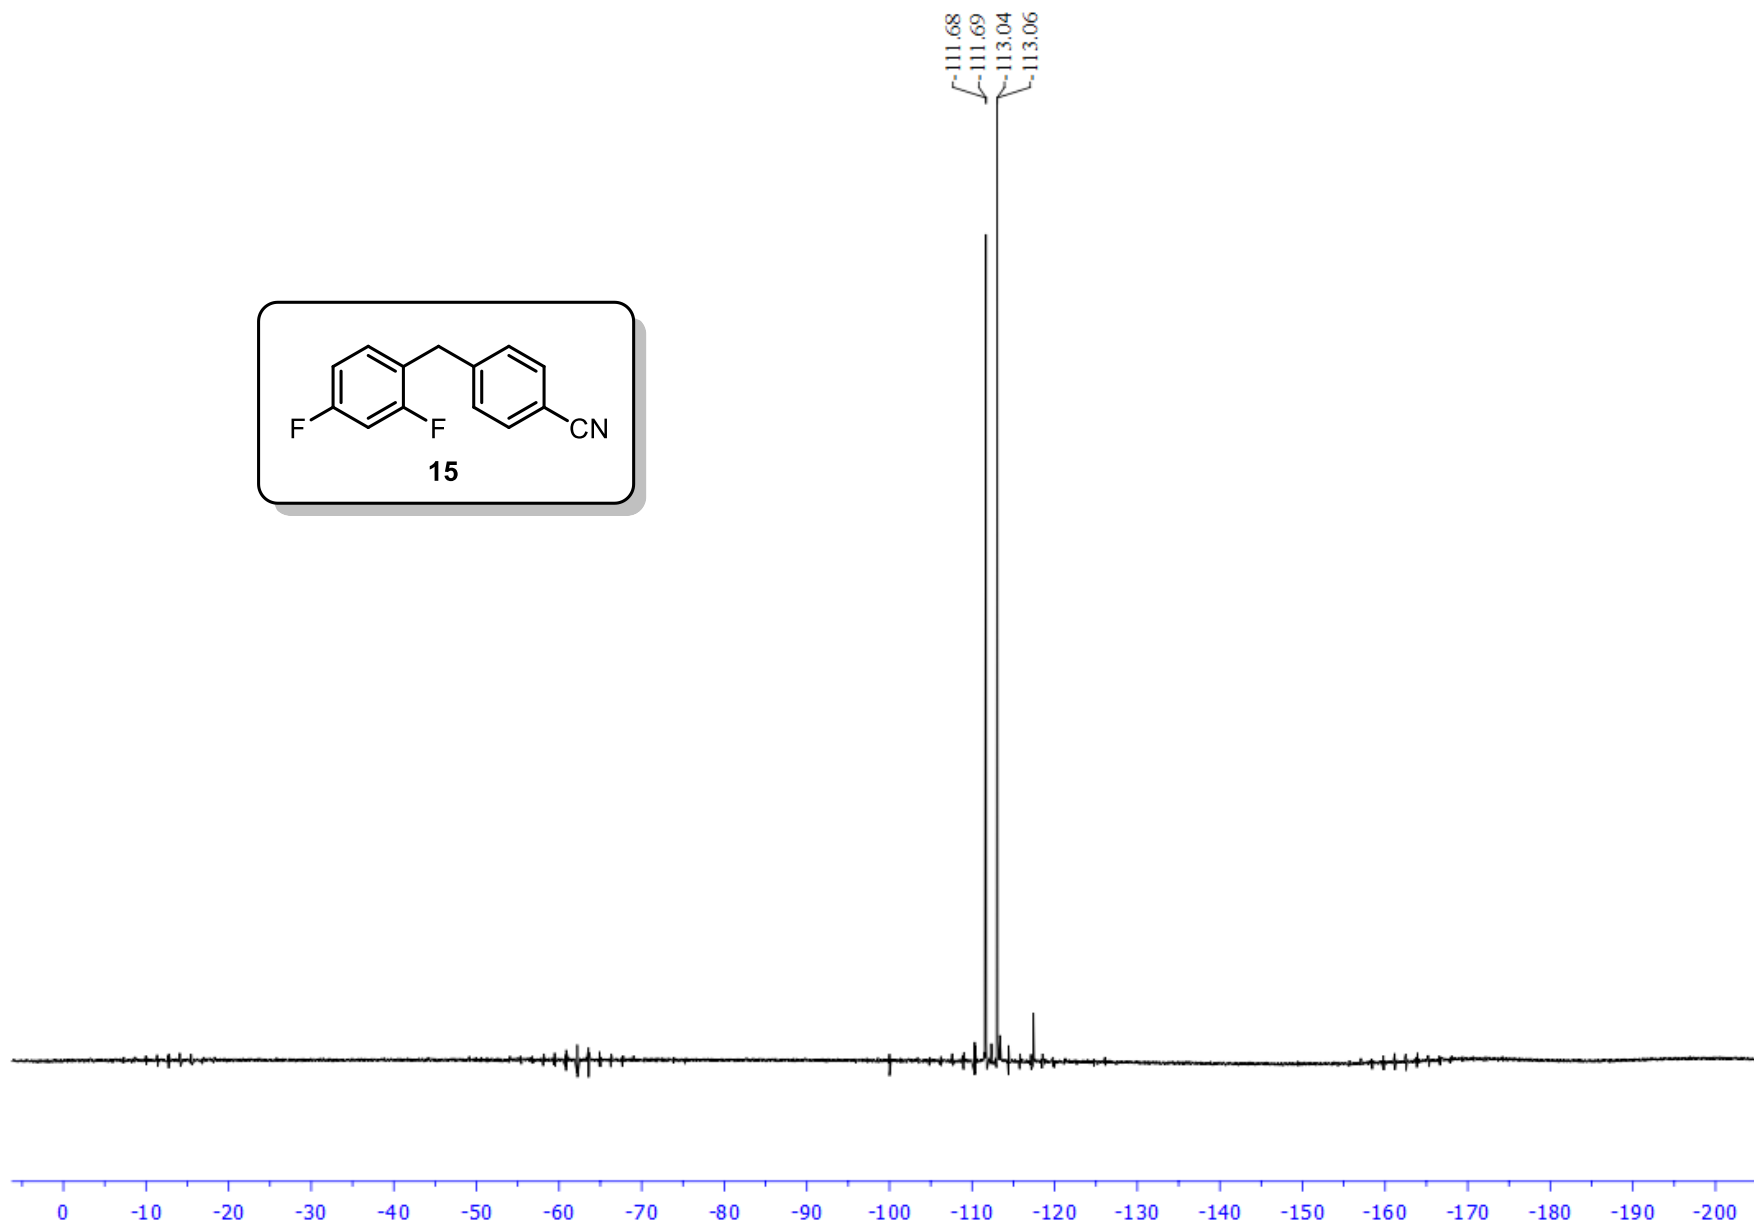

$^1\text{H}$  NMR ( $\text{CDCl}_3$ , 500 MHz) spectrum of 4-(4-methoxybenzyl)benzonitrile (**16**)

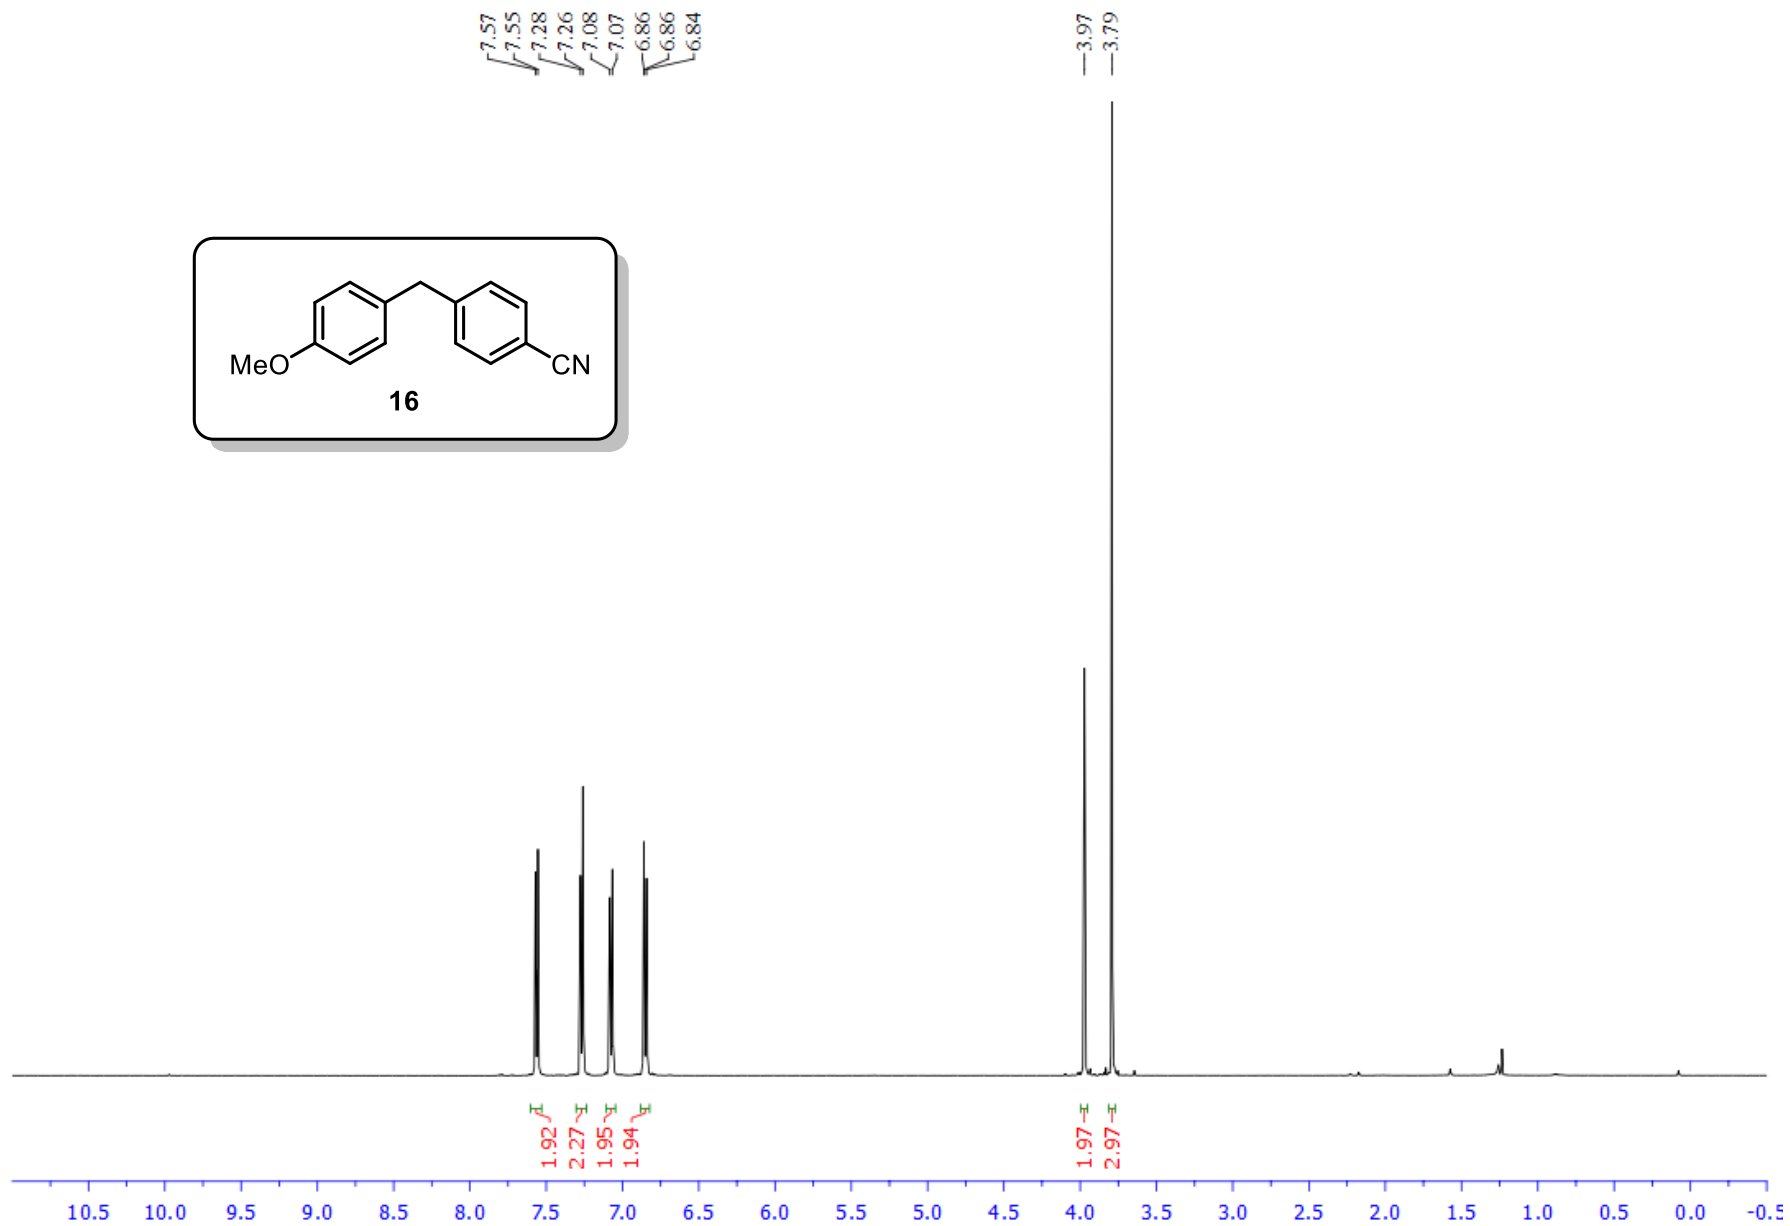

$^{13}\text{C}$  NMR ( $\text{CDCl}_3$ , 125.8 MHz) spectrum of 4-(4-methoxybenzyl)benzonitrile (**16**)

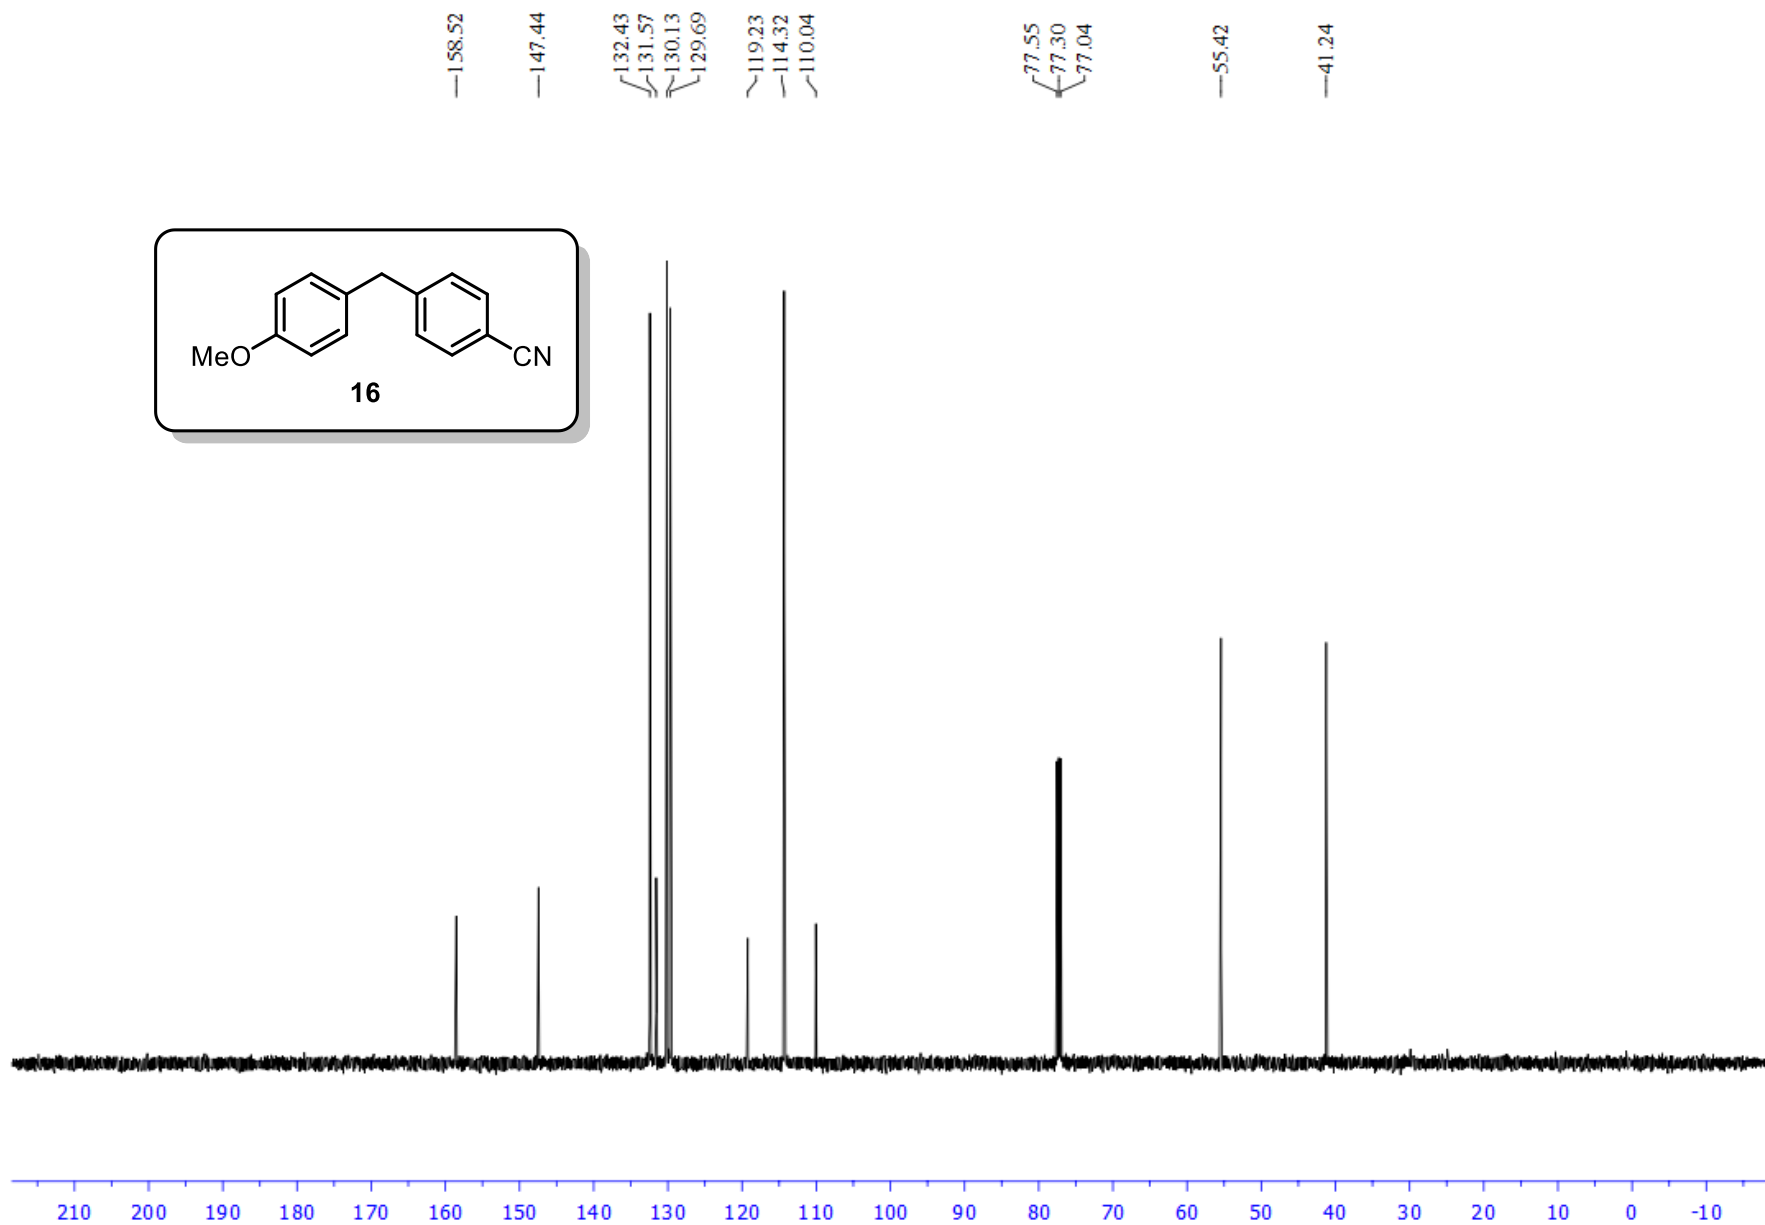

$^1\text{H}$  NMR ( $\text{CDCl}_3$ , 500 MHz) spectrum of methyl 4-(4-cyanobenzyl)benzoate (**17**)

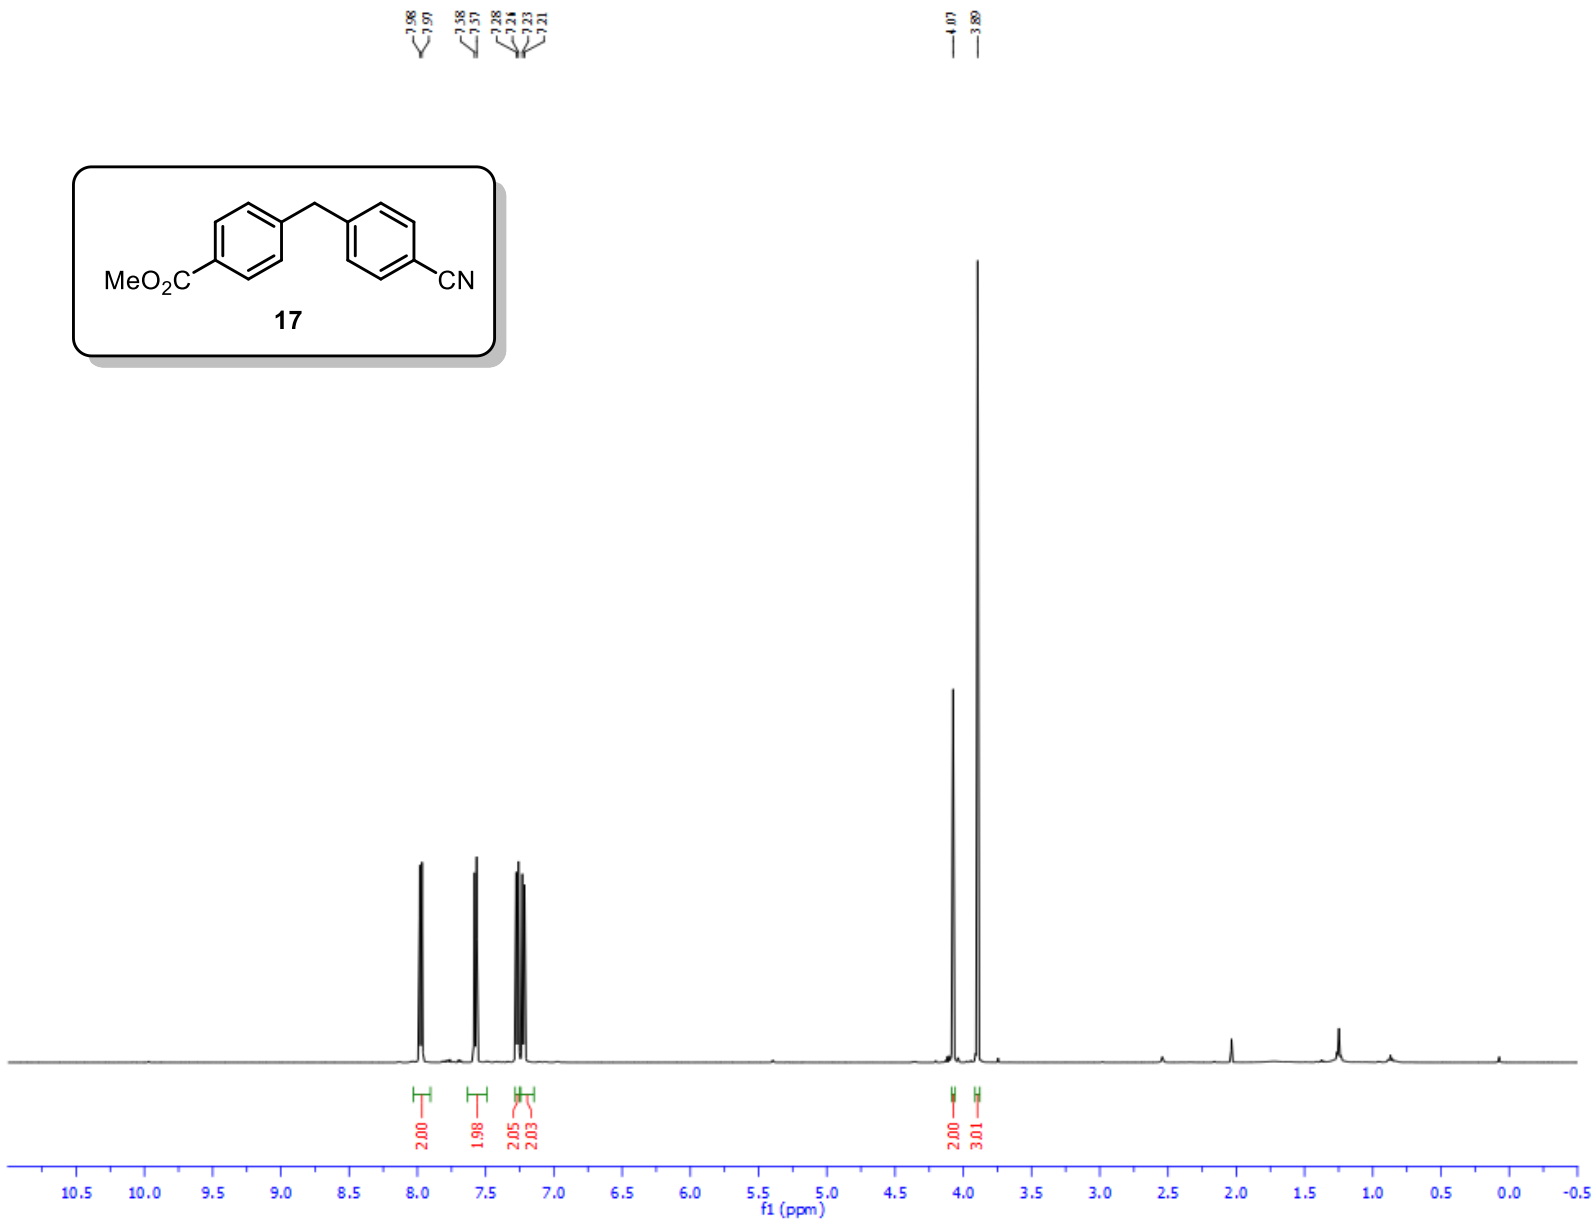

$^{13}\text{C}$  NMR ( $\text{CDCl}_3$ , 125.8 MHz) spectrum of methyl 4-(4-cyanobenzyl)benzoate (**17**)

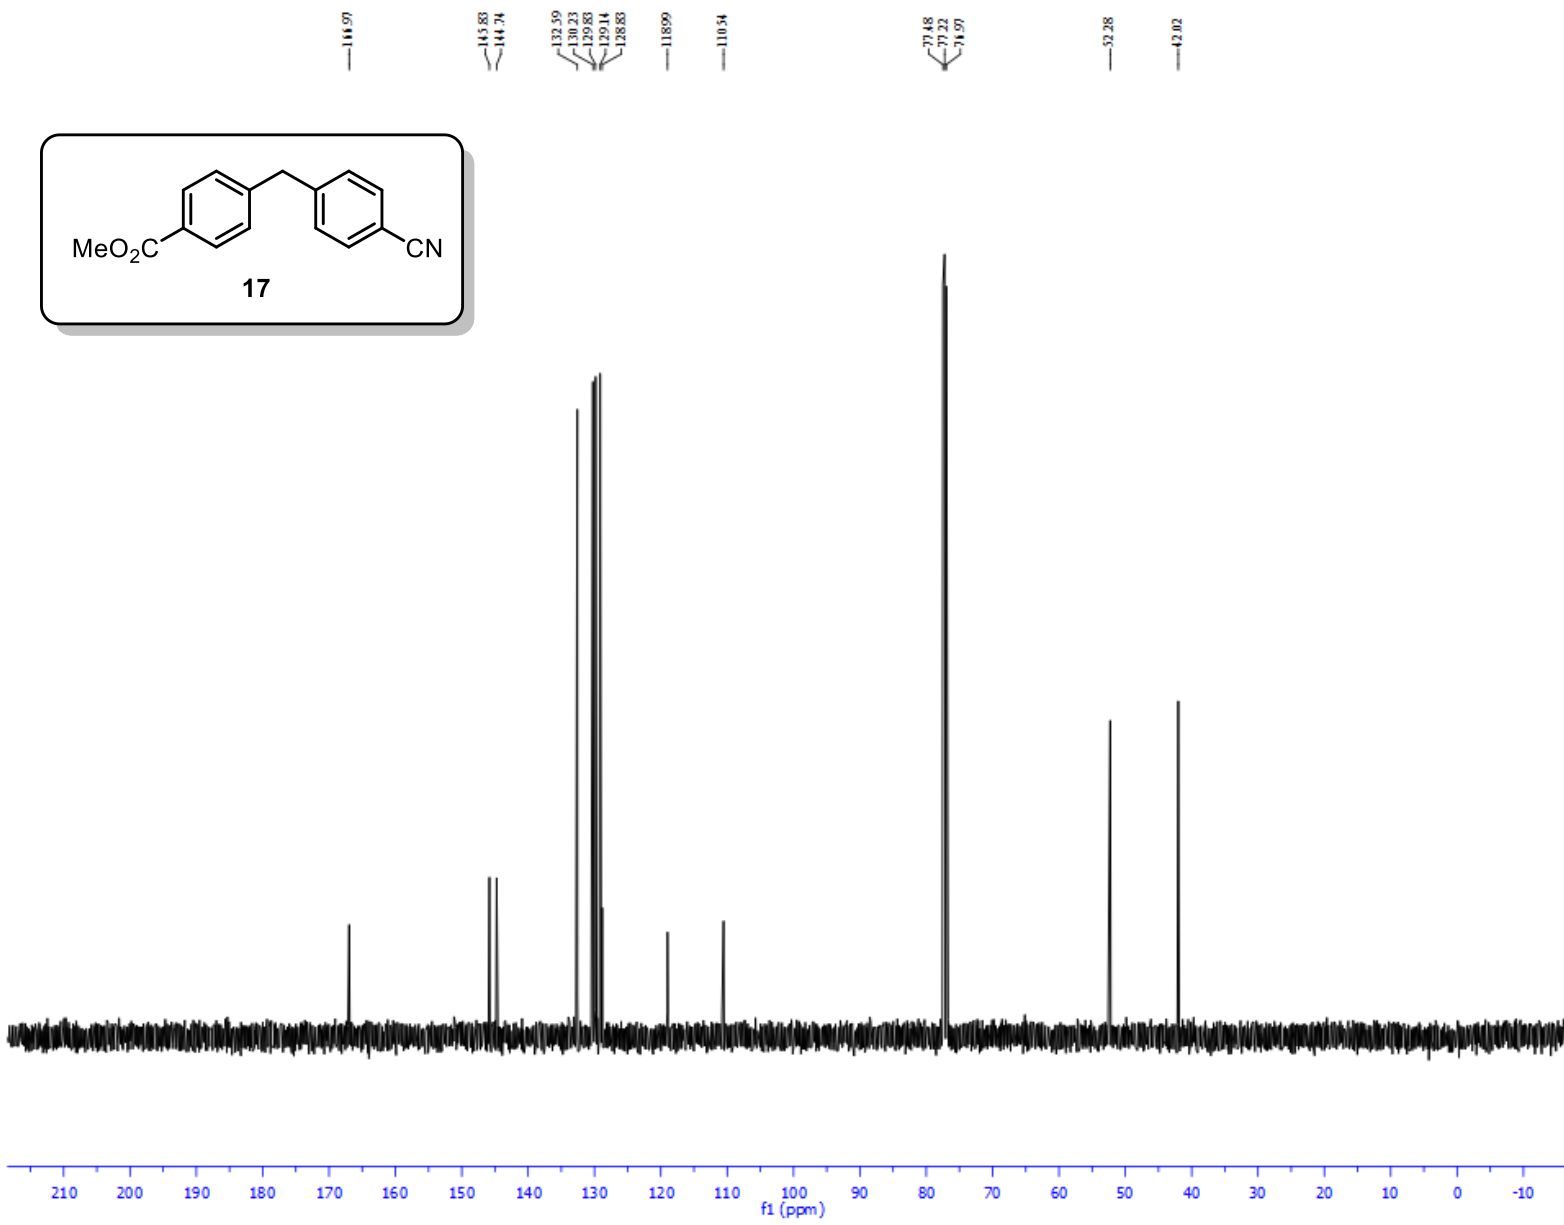

$^1\text{H}$  NMR ( $\text{CDCl}_3$ , 500 MHz) spectrum of 4-(benzo[d][1,3]dioxol-5-ylmethyl)benzonitrile (**18**)

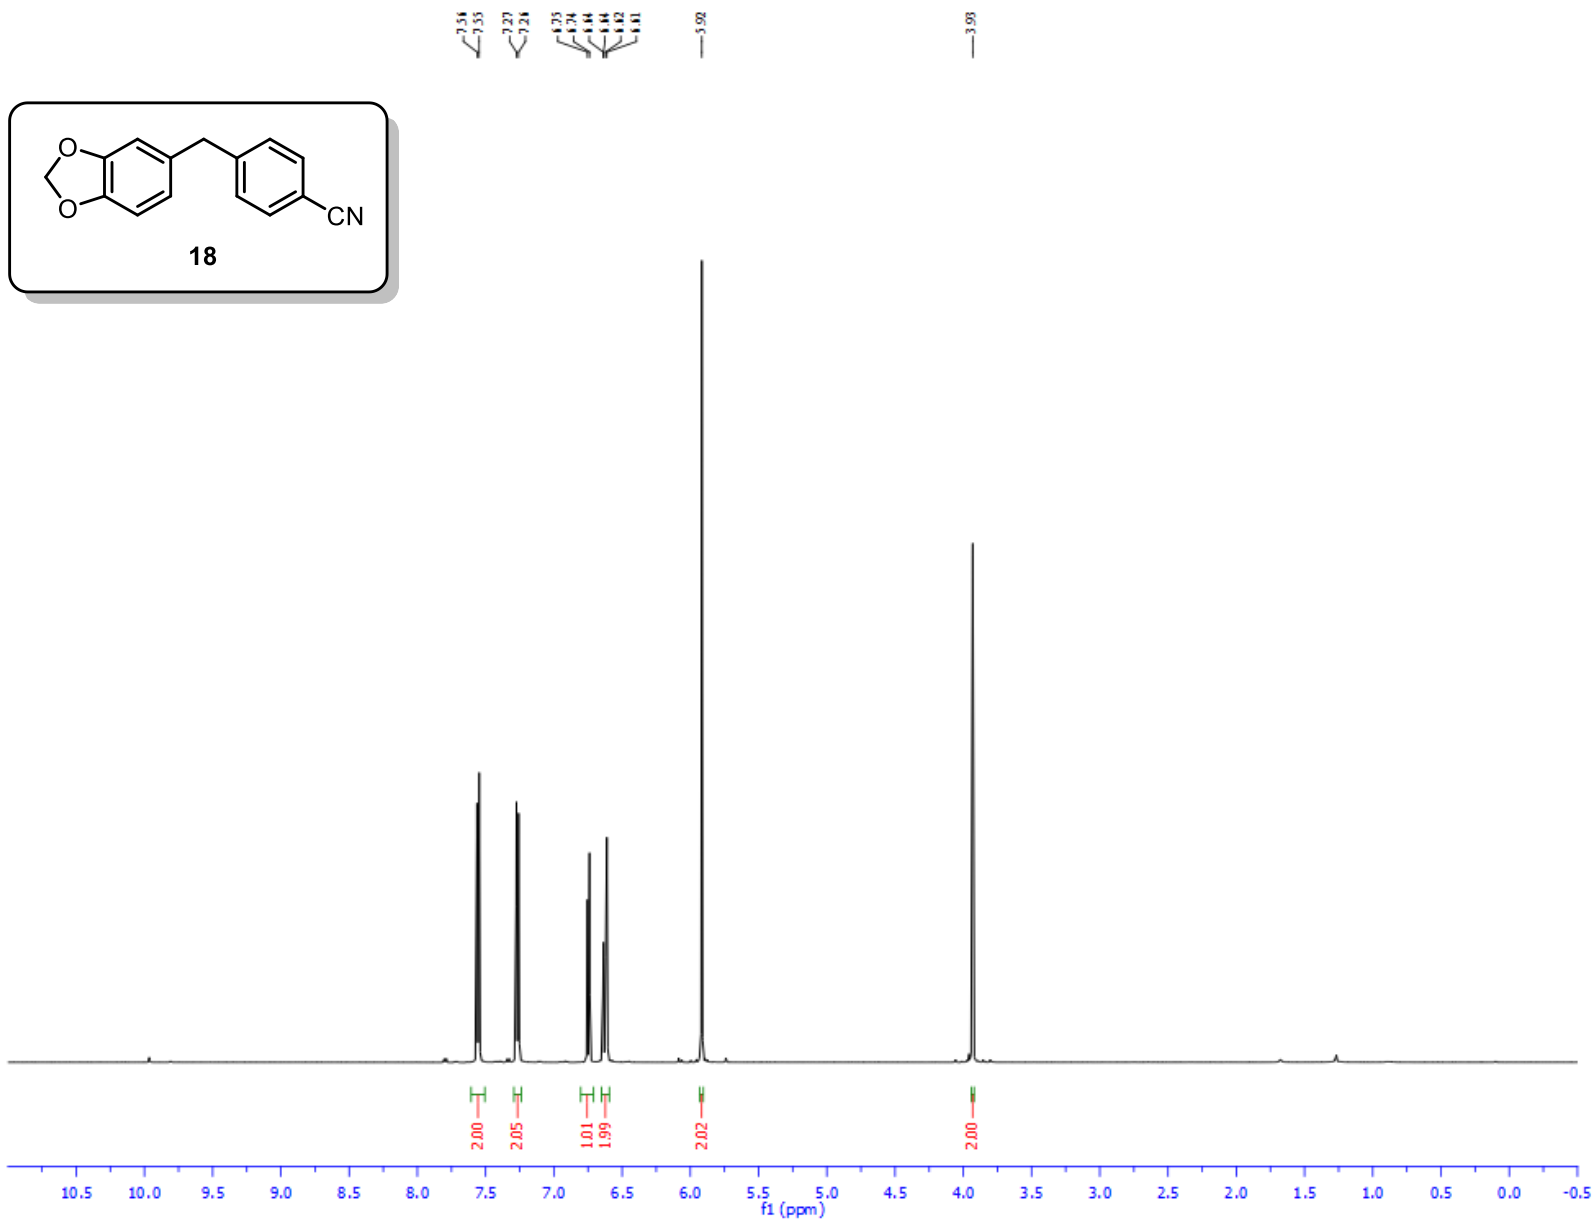

$^{13}\text{C}$  NMR ( $\text{CDCl}_3$ , 125.8 MHz) spectrum of 4-(benzo[d][1,3]dioxol-5-ylmethyl)benzonitrile (**18**)

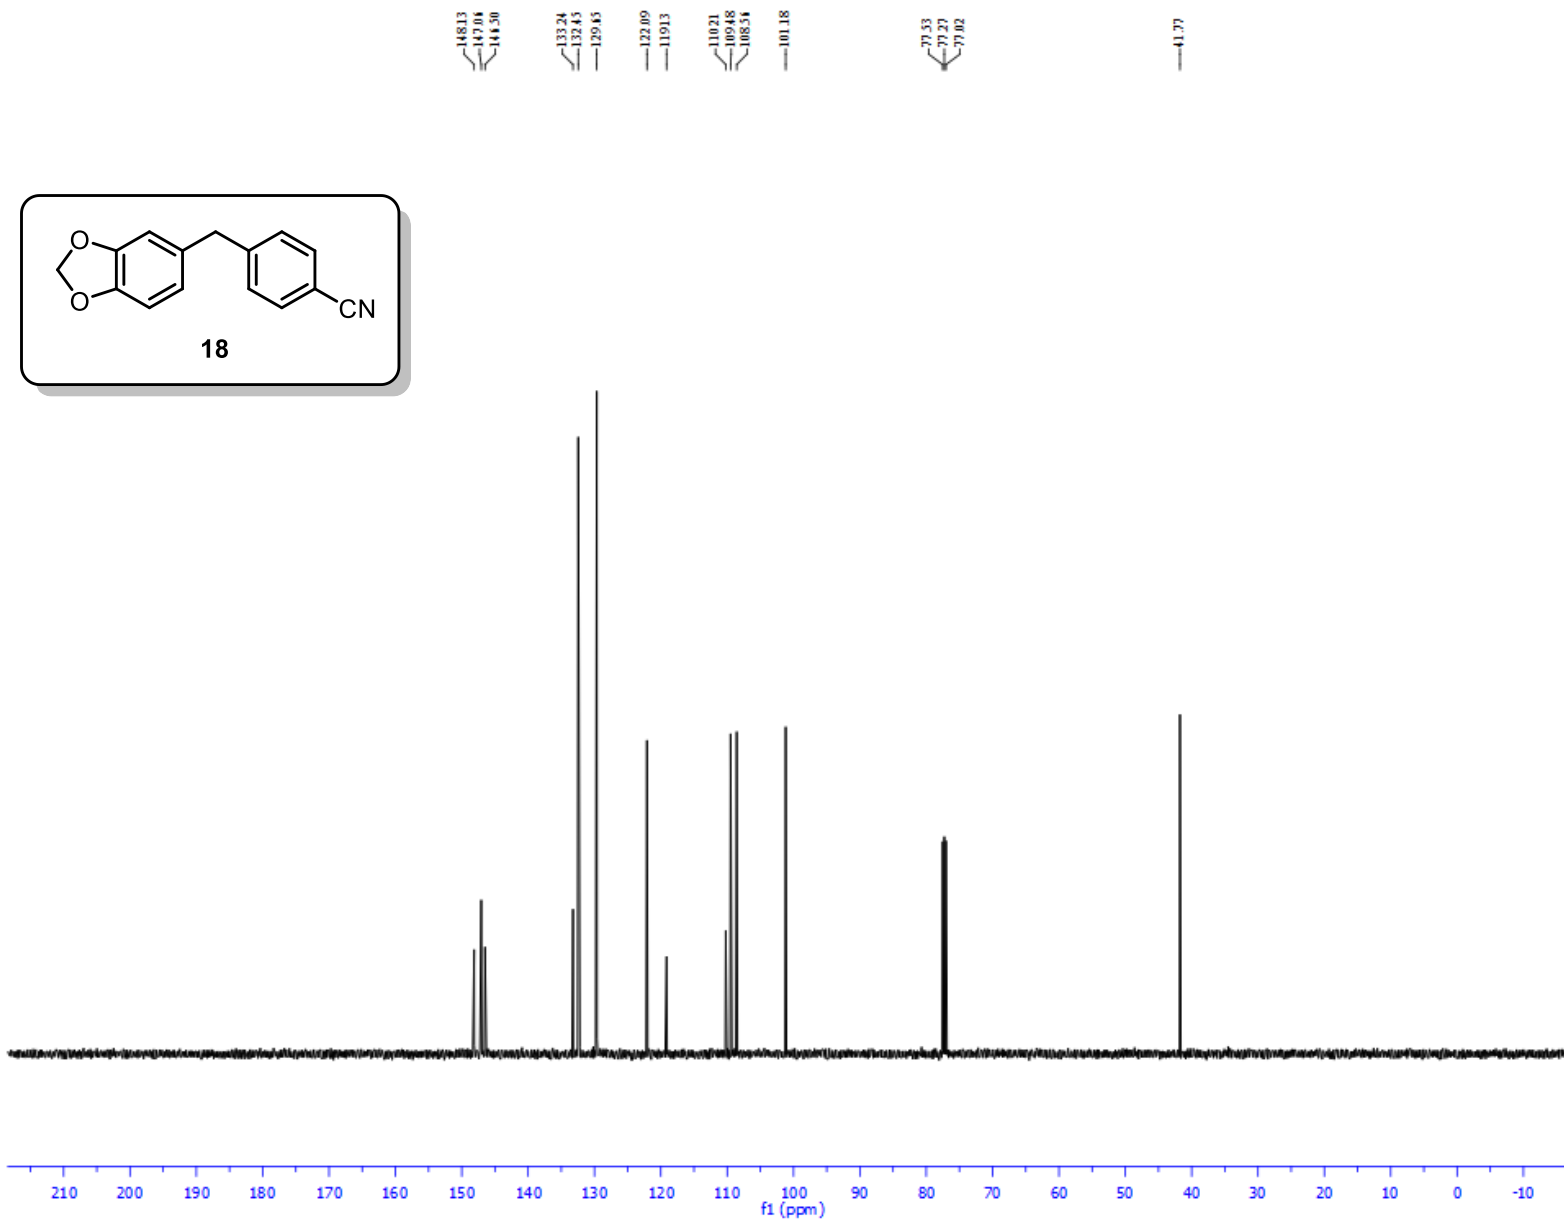

$^1\text{H}$  NMR ( $\text{CDCl}_3$ , 500 MHz) spectrum of 4-(4-(trifluoromethoxy)benzyl)benzonitrile (**19**)

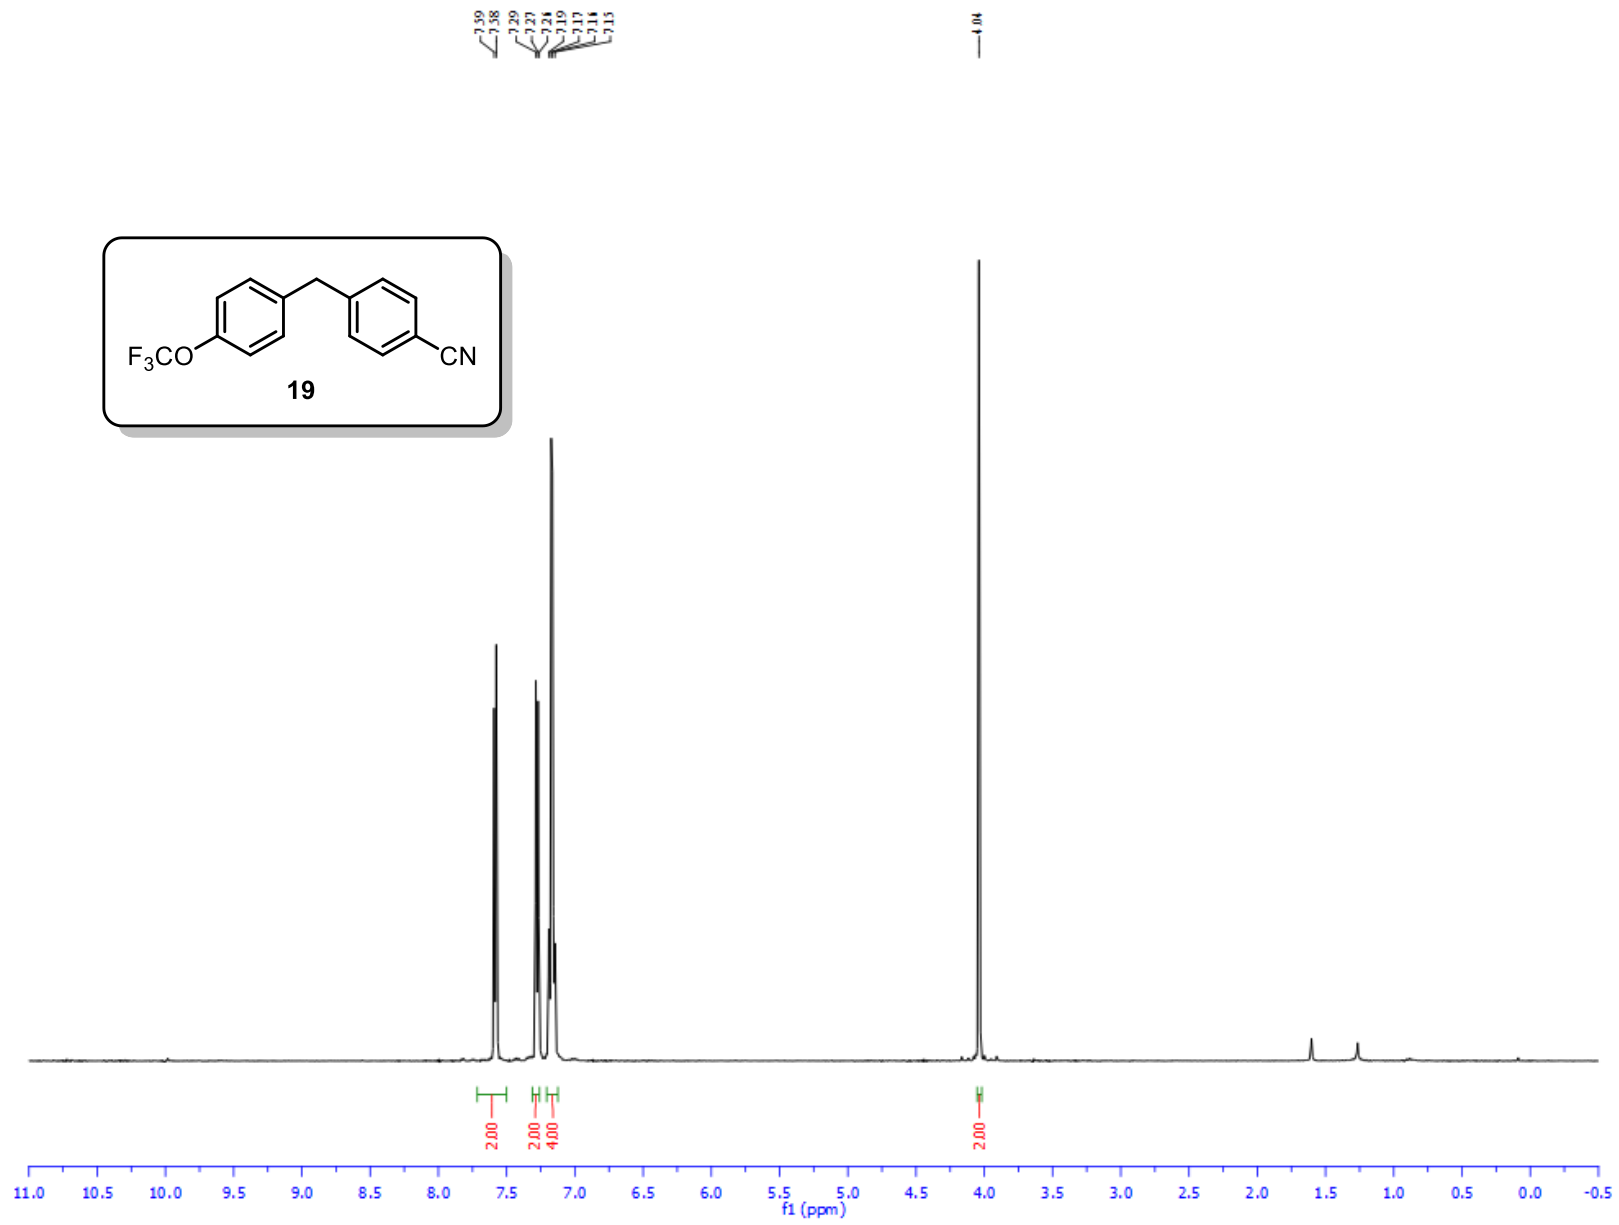



$^{13}\text{C}$  NMR ( $\text{CDCl}_3$ , 125.8 MHz) spectrum of 4-(4-(trifluoromethoxy)benzyl)benzonitrile (**19**)

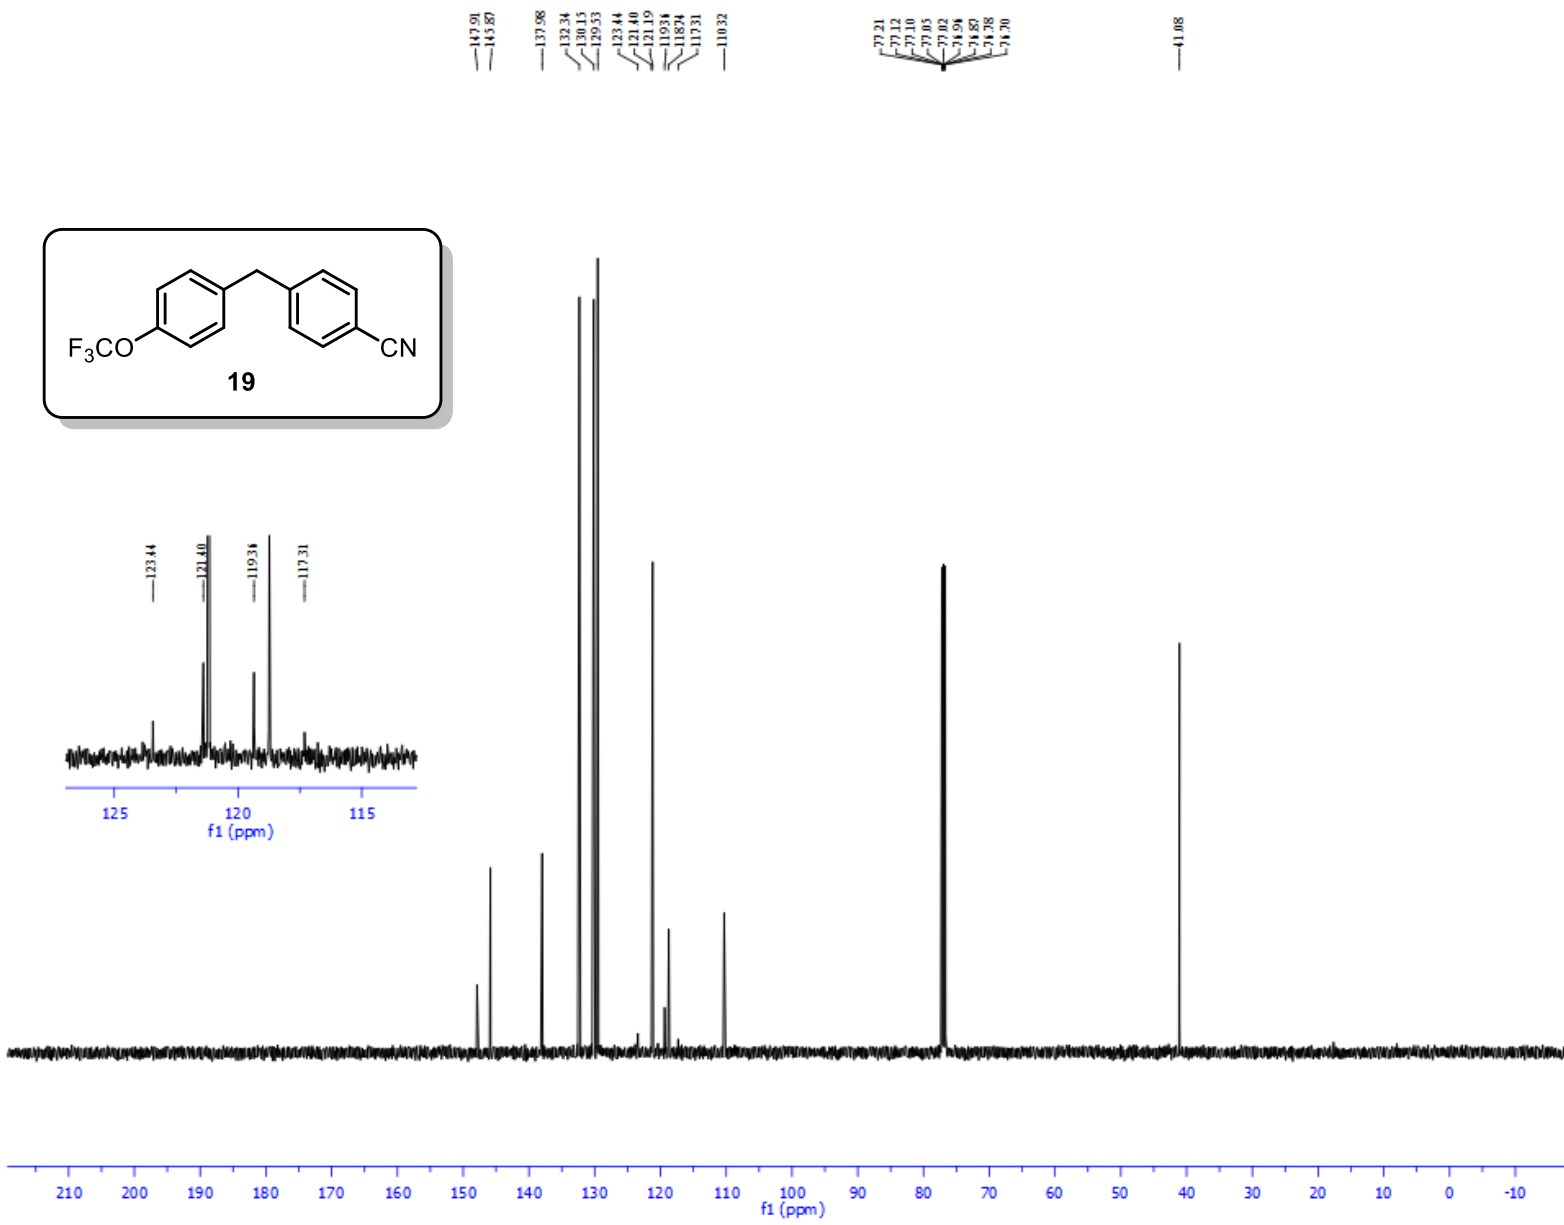

$^{19}\text{F}$  NMR ( $\text{CDCl}_3$ , 470.8 MHz) spectrum of 4-(4-(trifluoromethoxy)benzyl)benzonitrile (**19**)

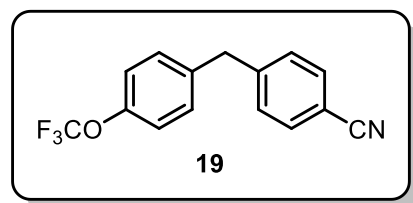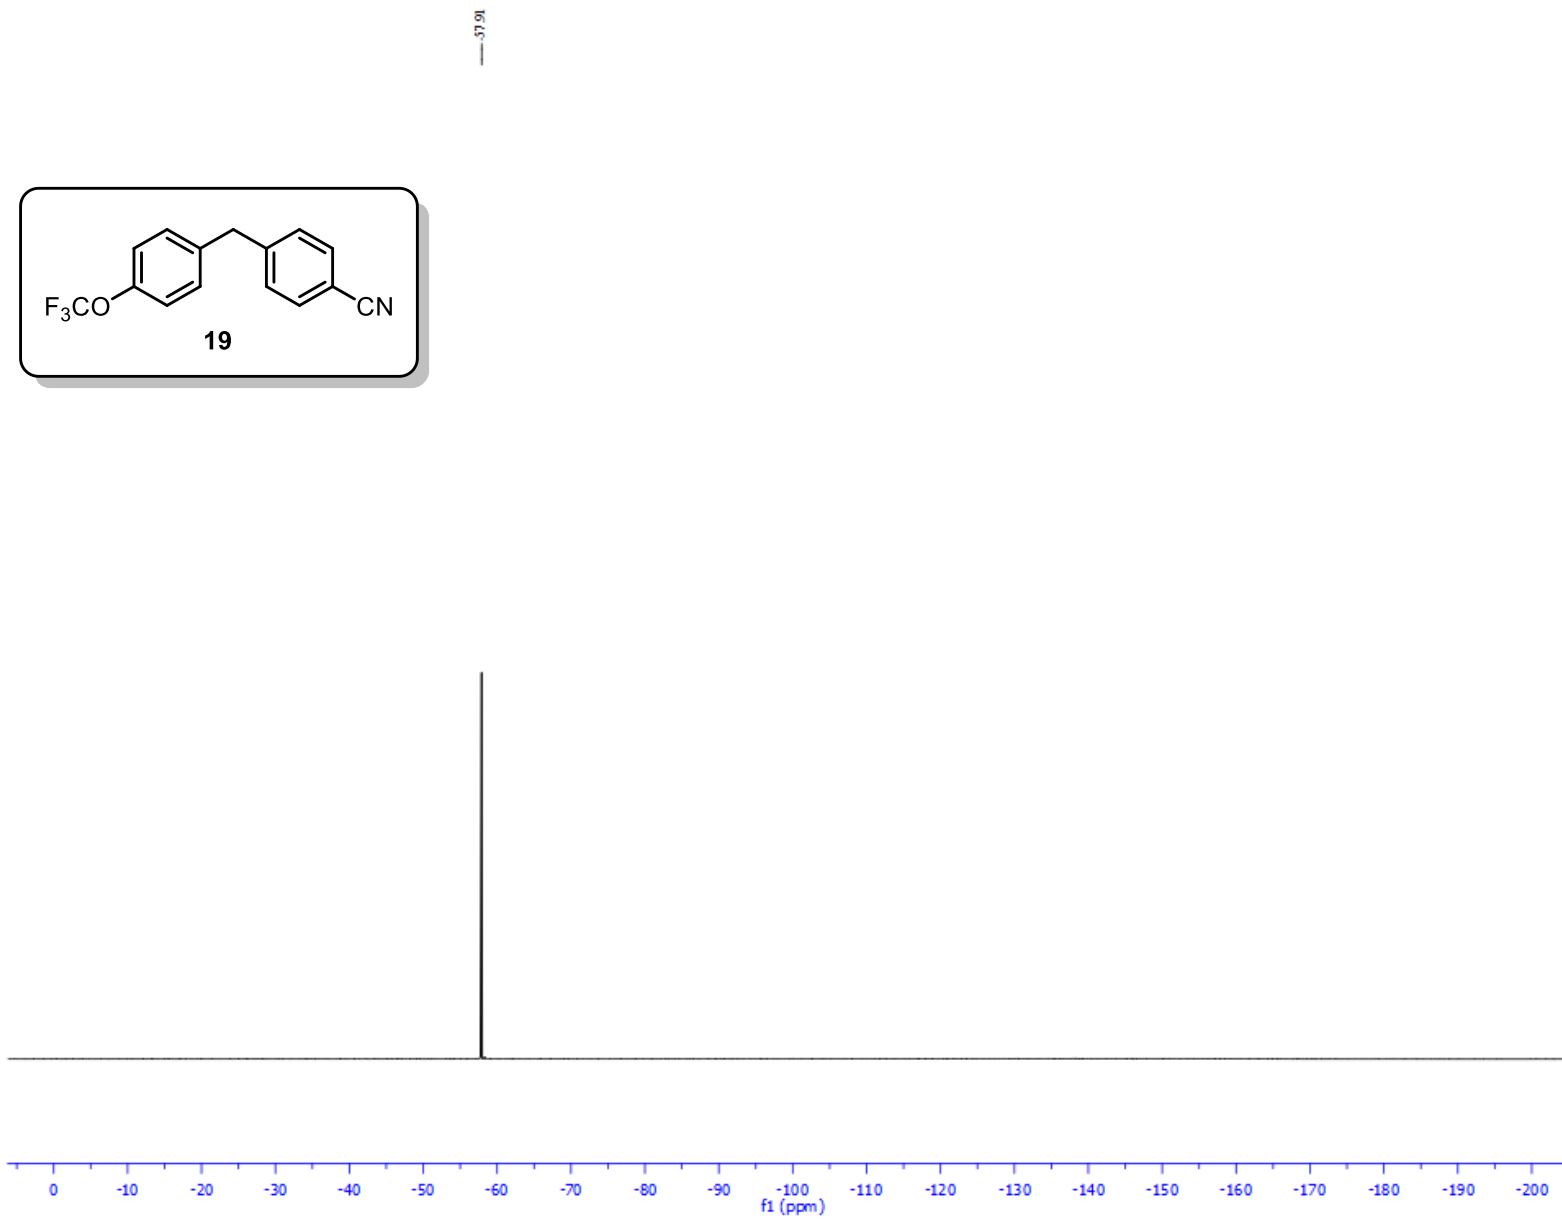

$^1\text{H}$  NMR ( $\text{CDCl}_3$ , 500 MHz) spectrum of 4-(3,5-dimethoxybenzyl)benzonitrile (**20**)

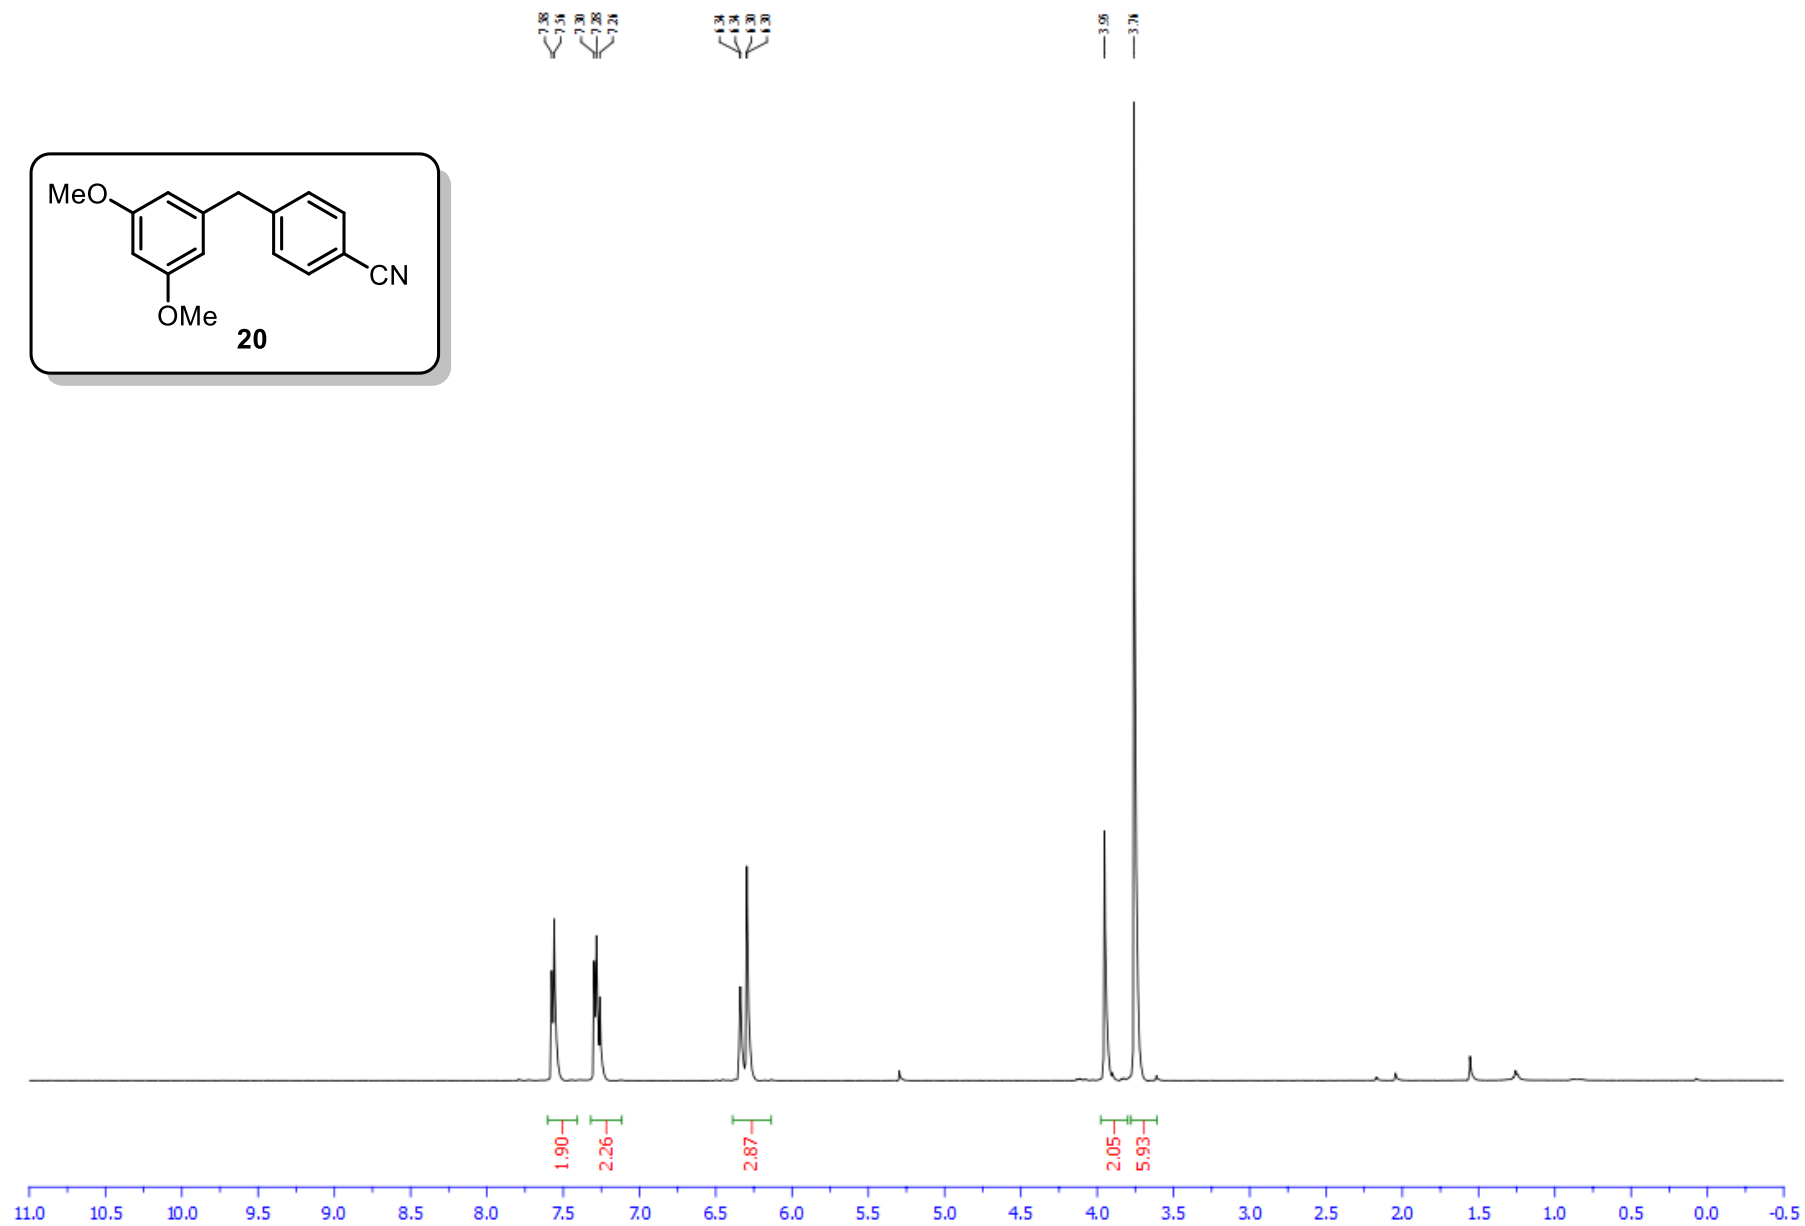

$^{13}\text{C}$  NMR ( $\text{CDCl}_3$ , 125.8 MHz) spectrum of 4-(3,5-dimethoxybenzyl)benzonitrile (**20**)

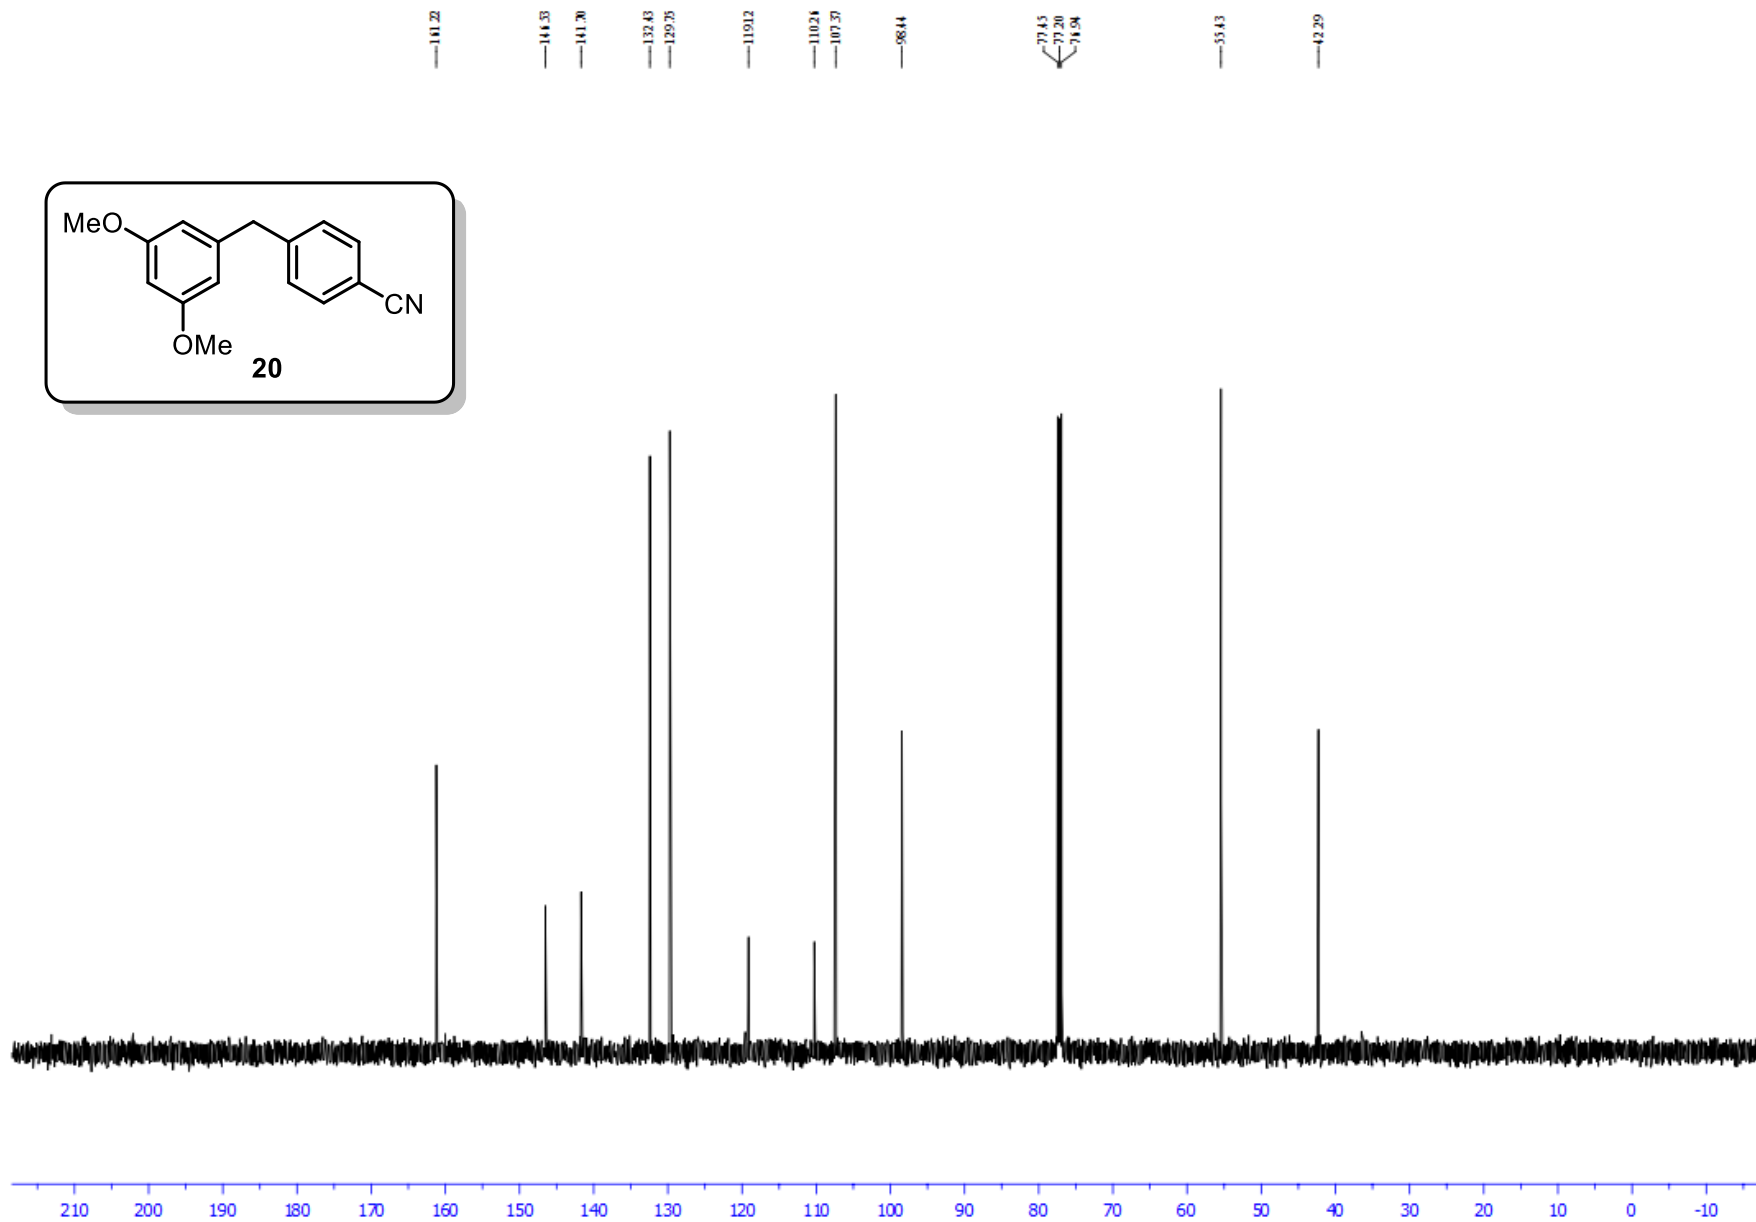

$^1\text{H}$  NMR ( $\text{CDCl}_3$ , 500 MHz) spectrum of 1-benzyl-4-(trifluoromethyl)benzene (**21**)

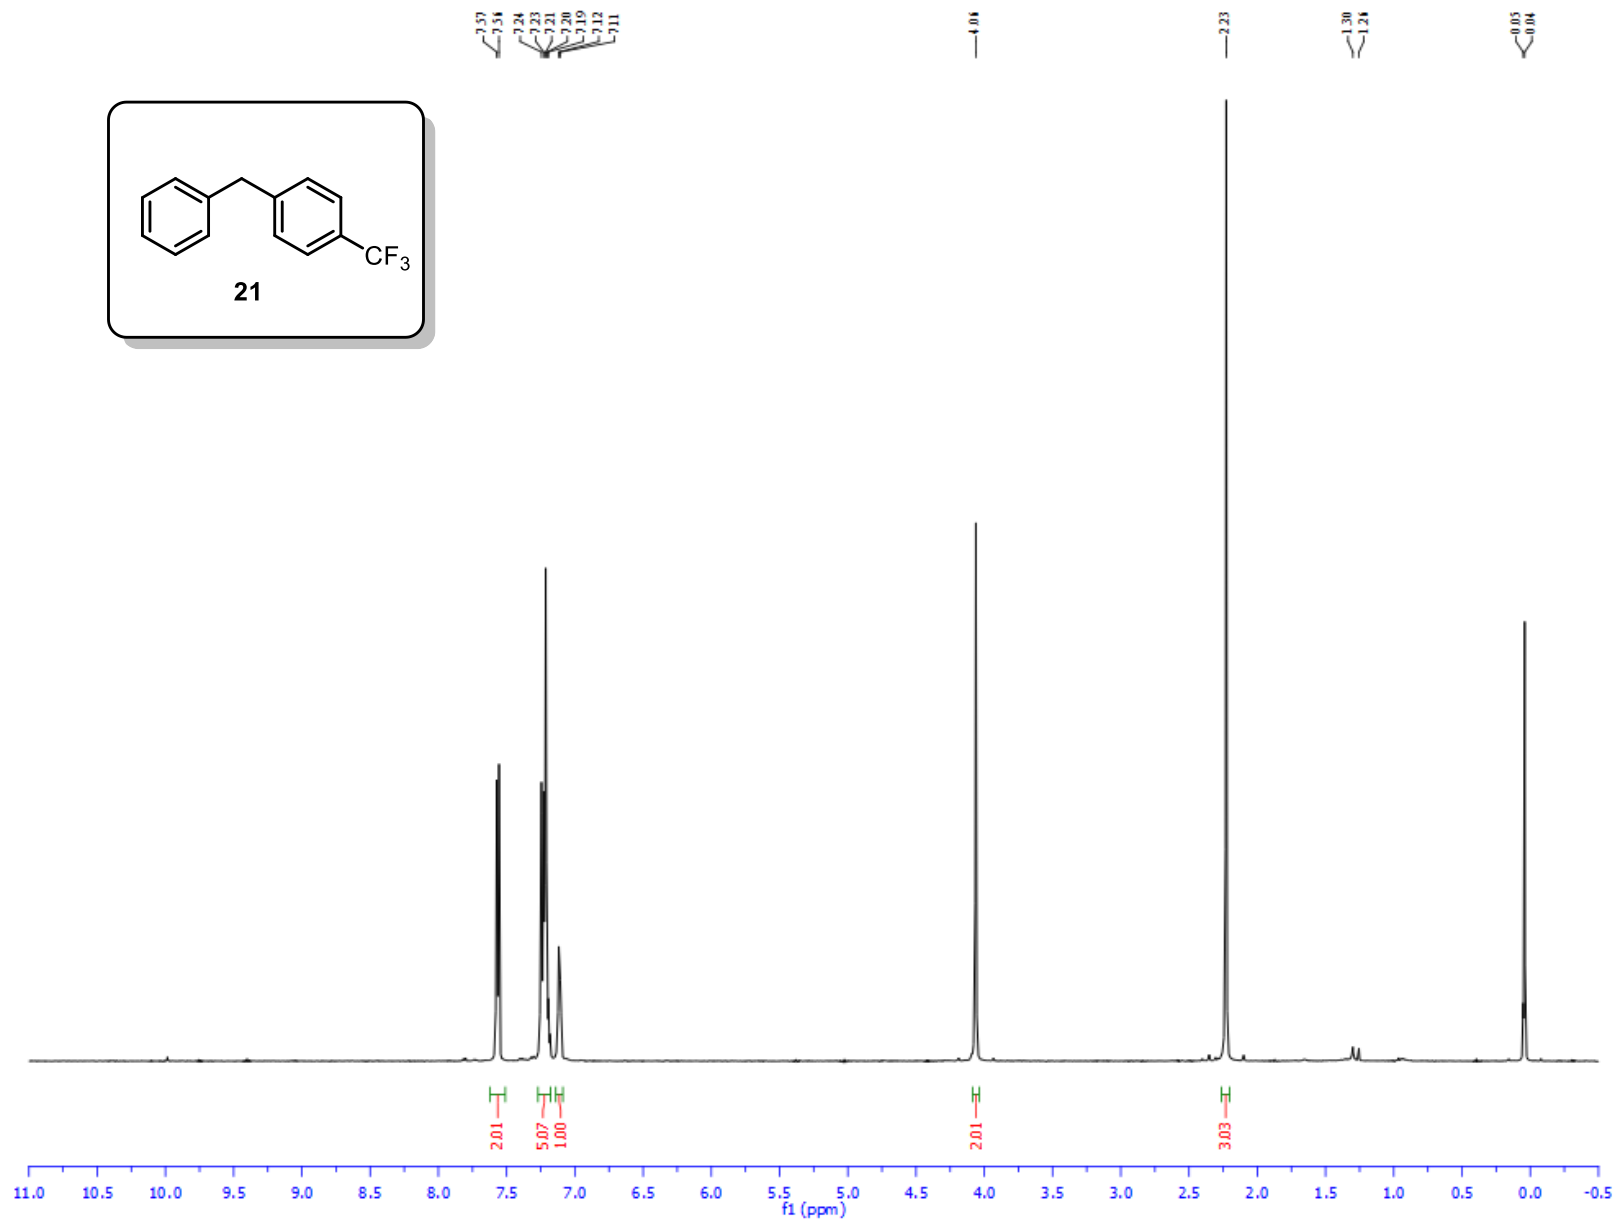

$^{13}\text{C}$  NMR ( $\text{CDCl}_3$ , 125.8 MHz) spectrum of 1-benzyl-4-(trifluoromethyl)benzene (**21**)

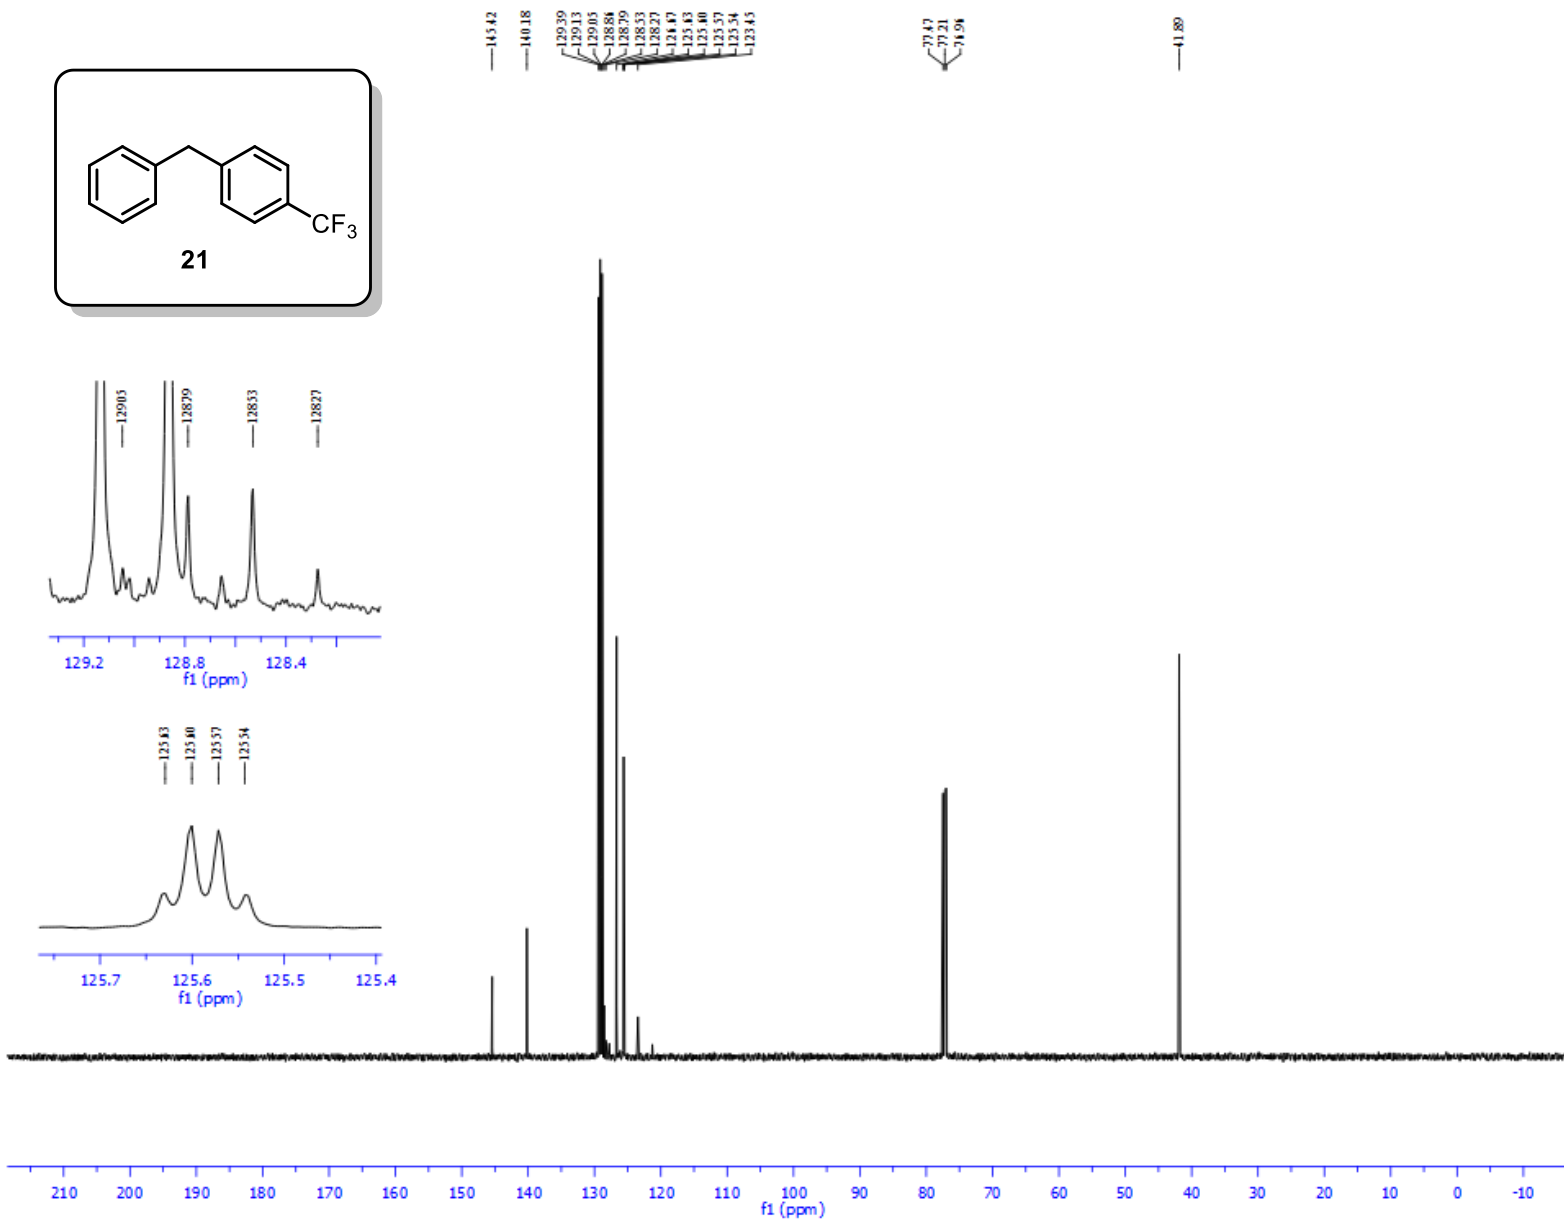

$^{19}\text{F}$  NMR ( $\text{CDCl}_3$ , 470.8 MHz) spectrum of 1-benzyl-4-(trifluoromethyl)benzene (**21**)

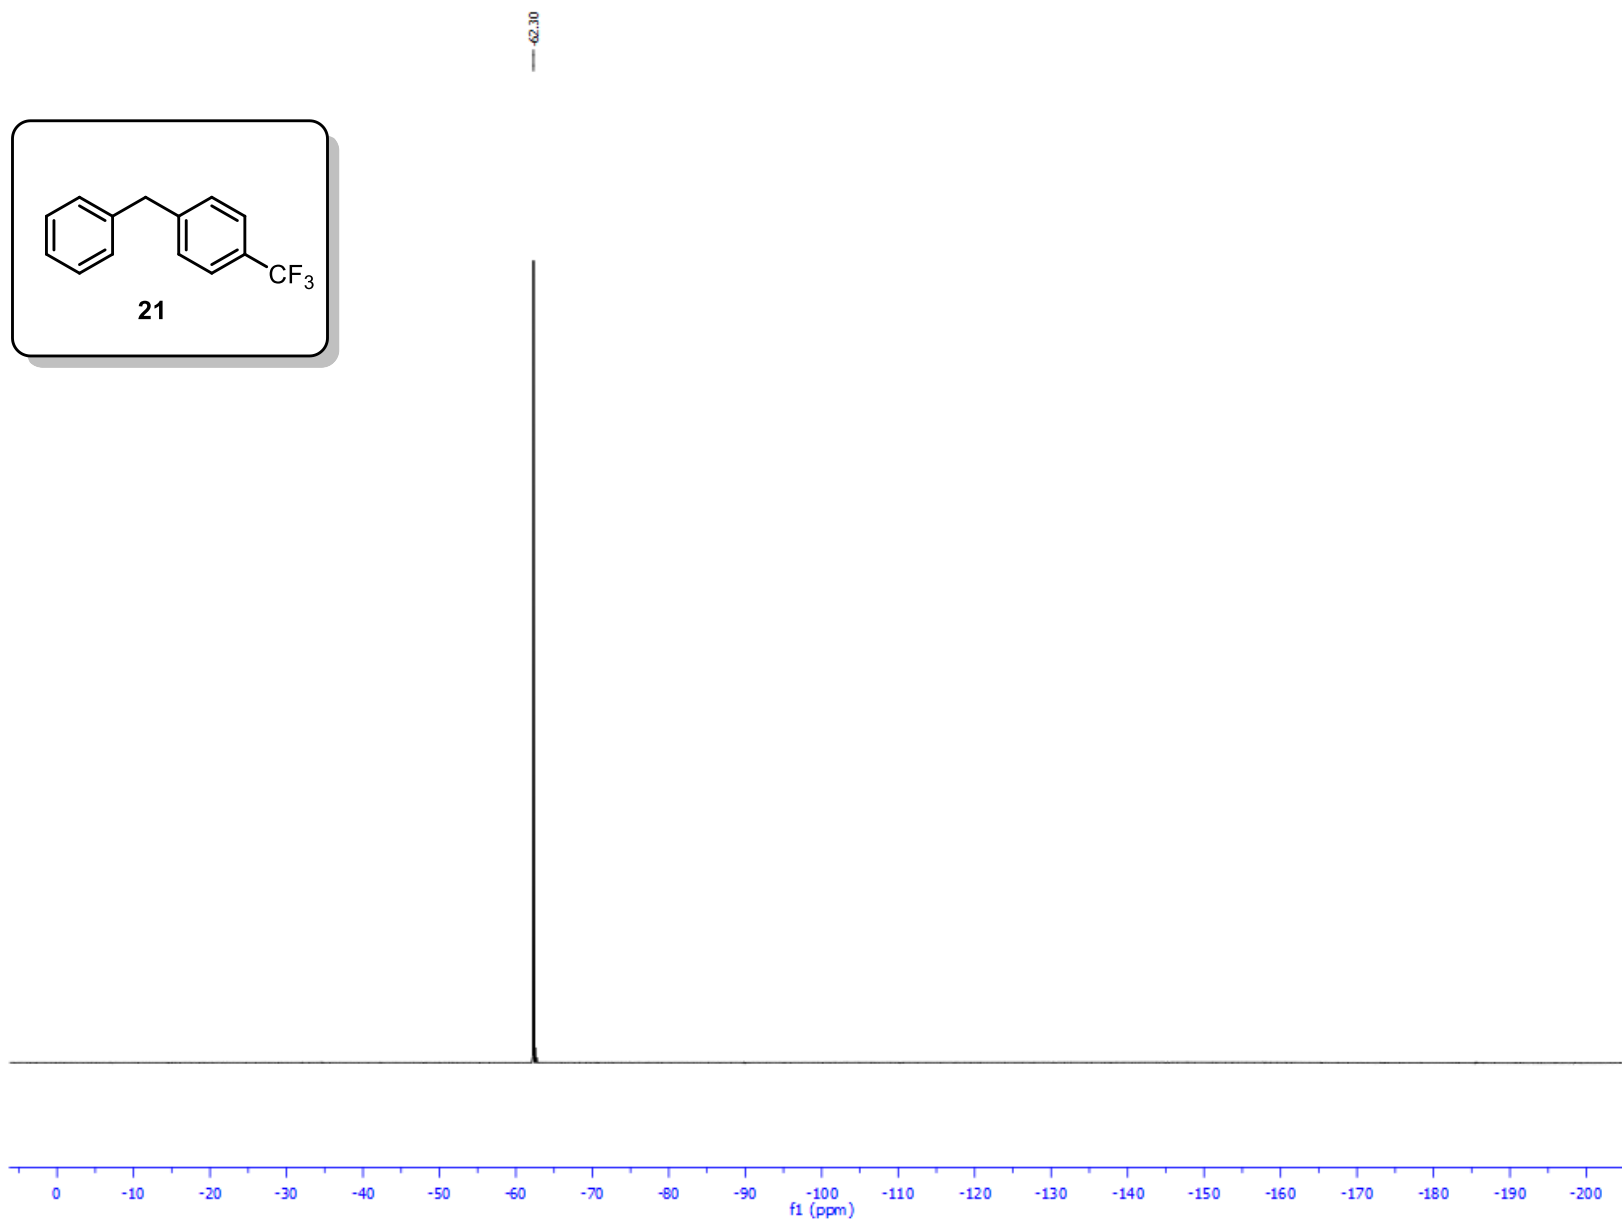

$^1\text{H}$  NMR ( $\text{CDCl}_3$ , 500 MHz) spectrum of 1-benzyl-4-methoxybenzene (**22**)

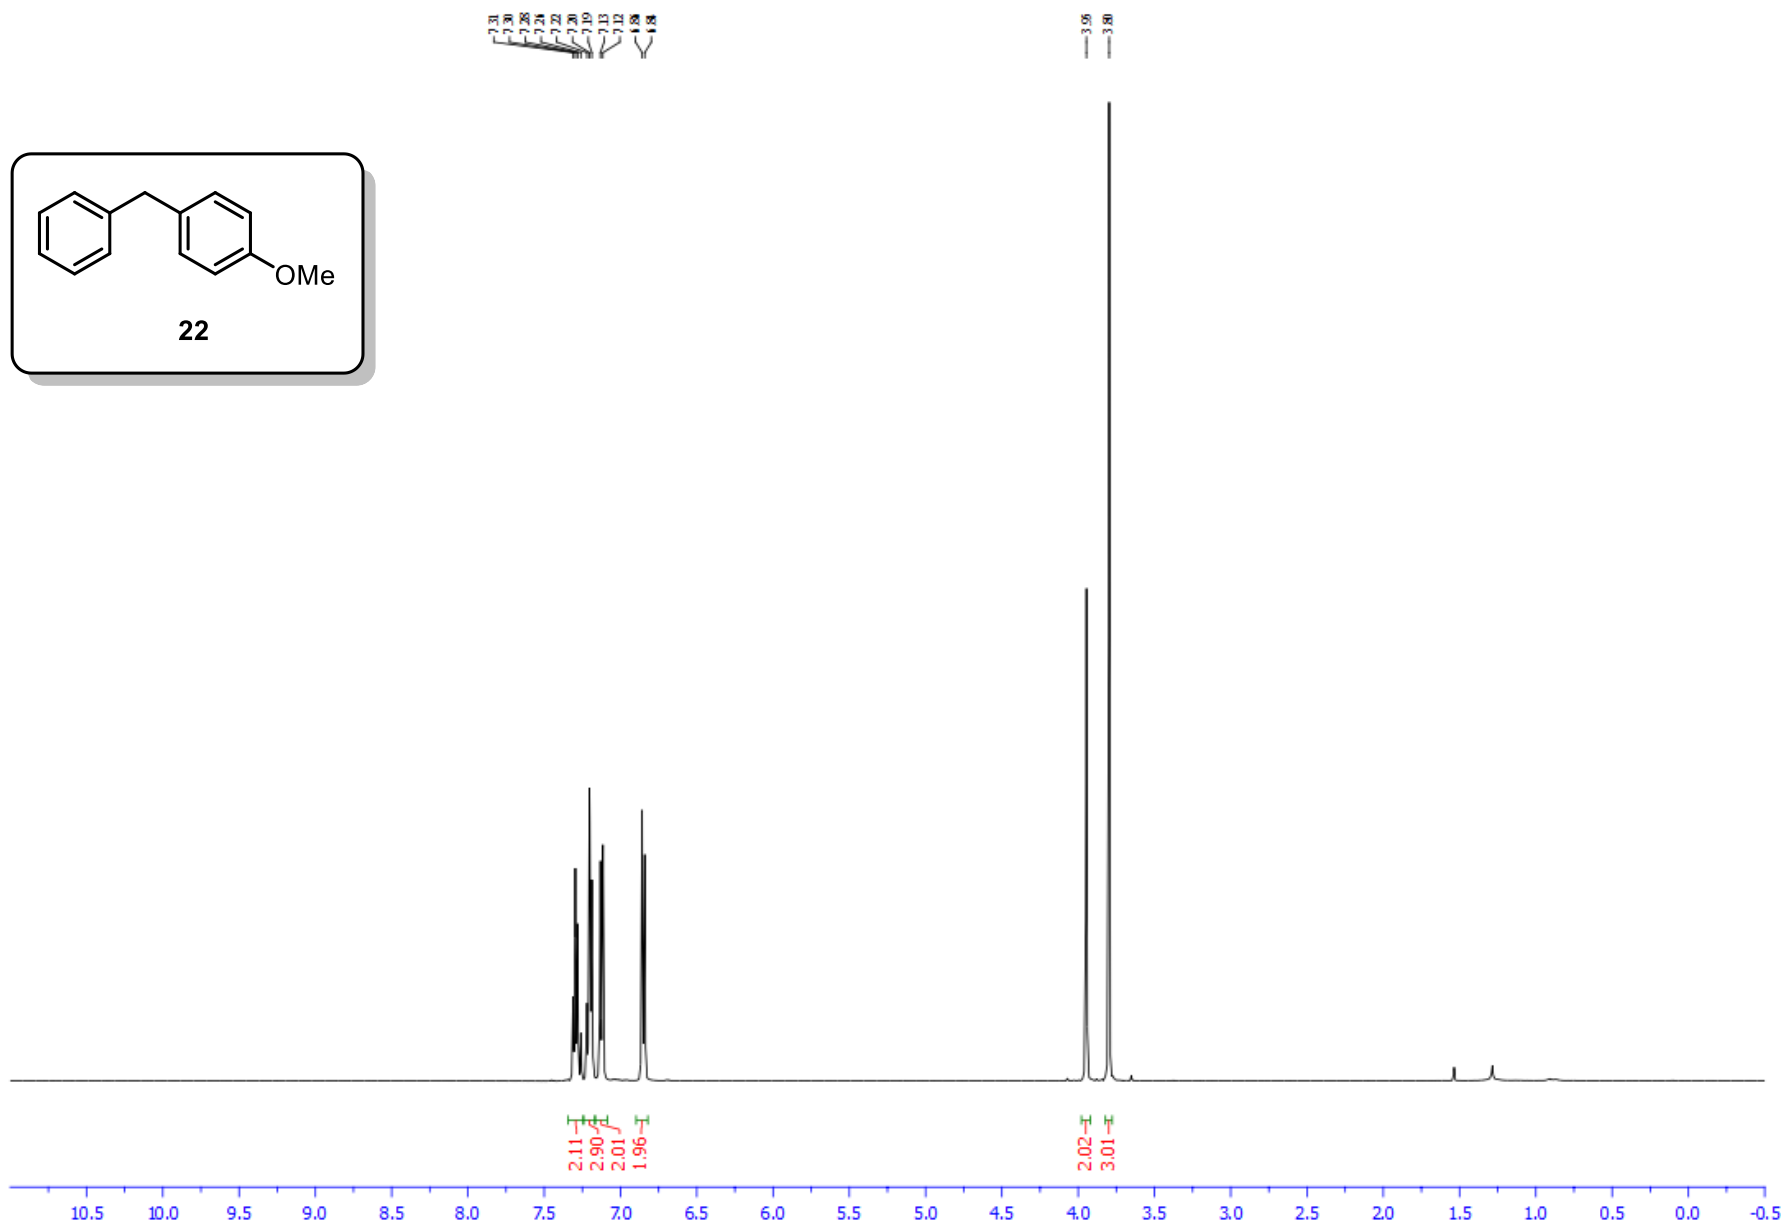



$^{13}\text{C}$  NMR ( $\text{CDCl}_3$ , 125.8 MHz) spectrum of 1-benzyl-4-methoxybenzene (**22**)

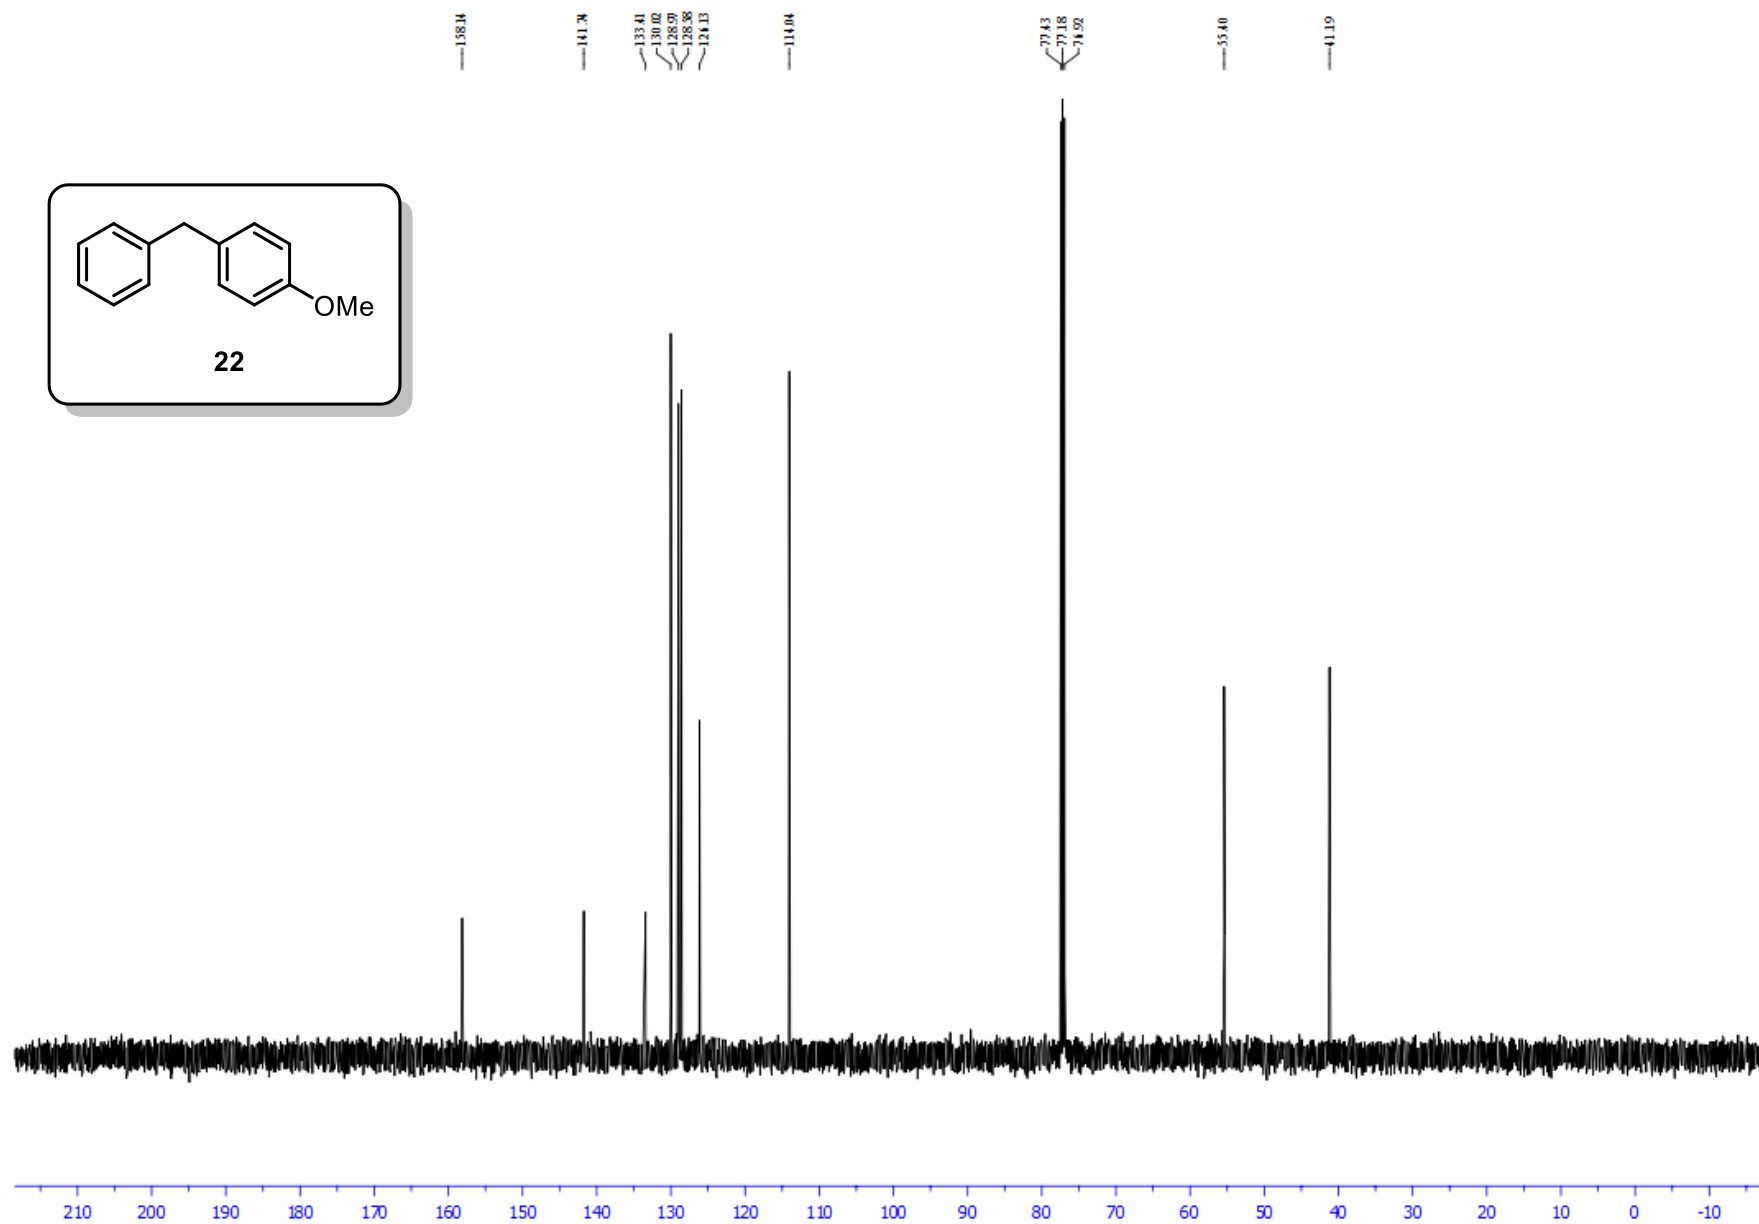

$^1\text{H}$  NMR ( $\text{CDCl}_3$ , 500 MHz) spectrum of methyl 3-benzylbenzoate (23)

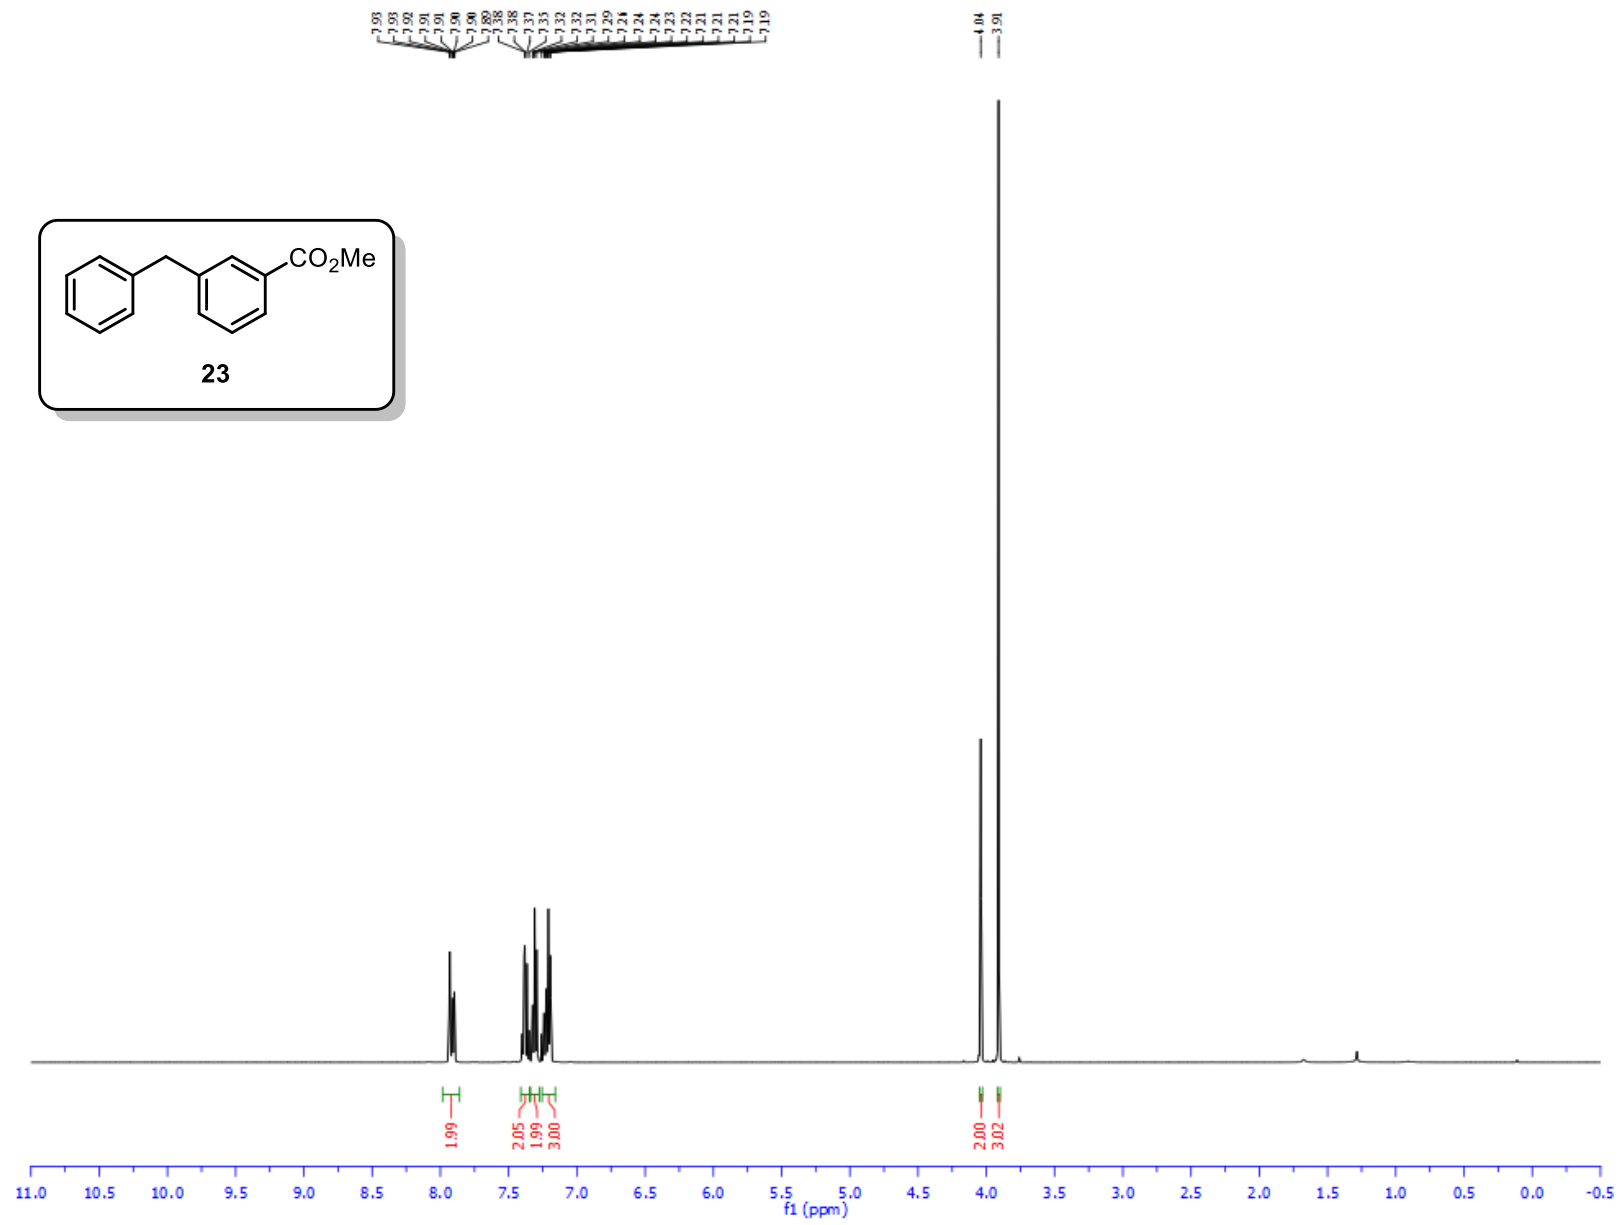

$^{13}\text{C}$  NMR ( $\text{CDCl}_3$ , 125.8 MHz) spectrum of methyl 3-benzylbenzoate (**23**)

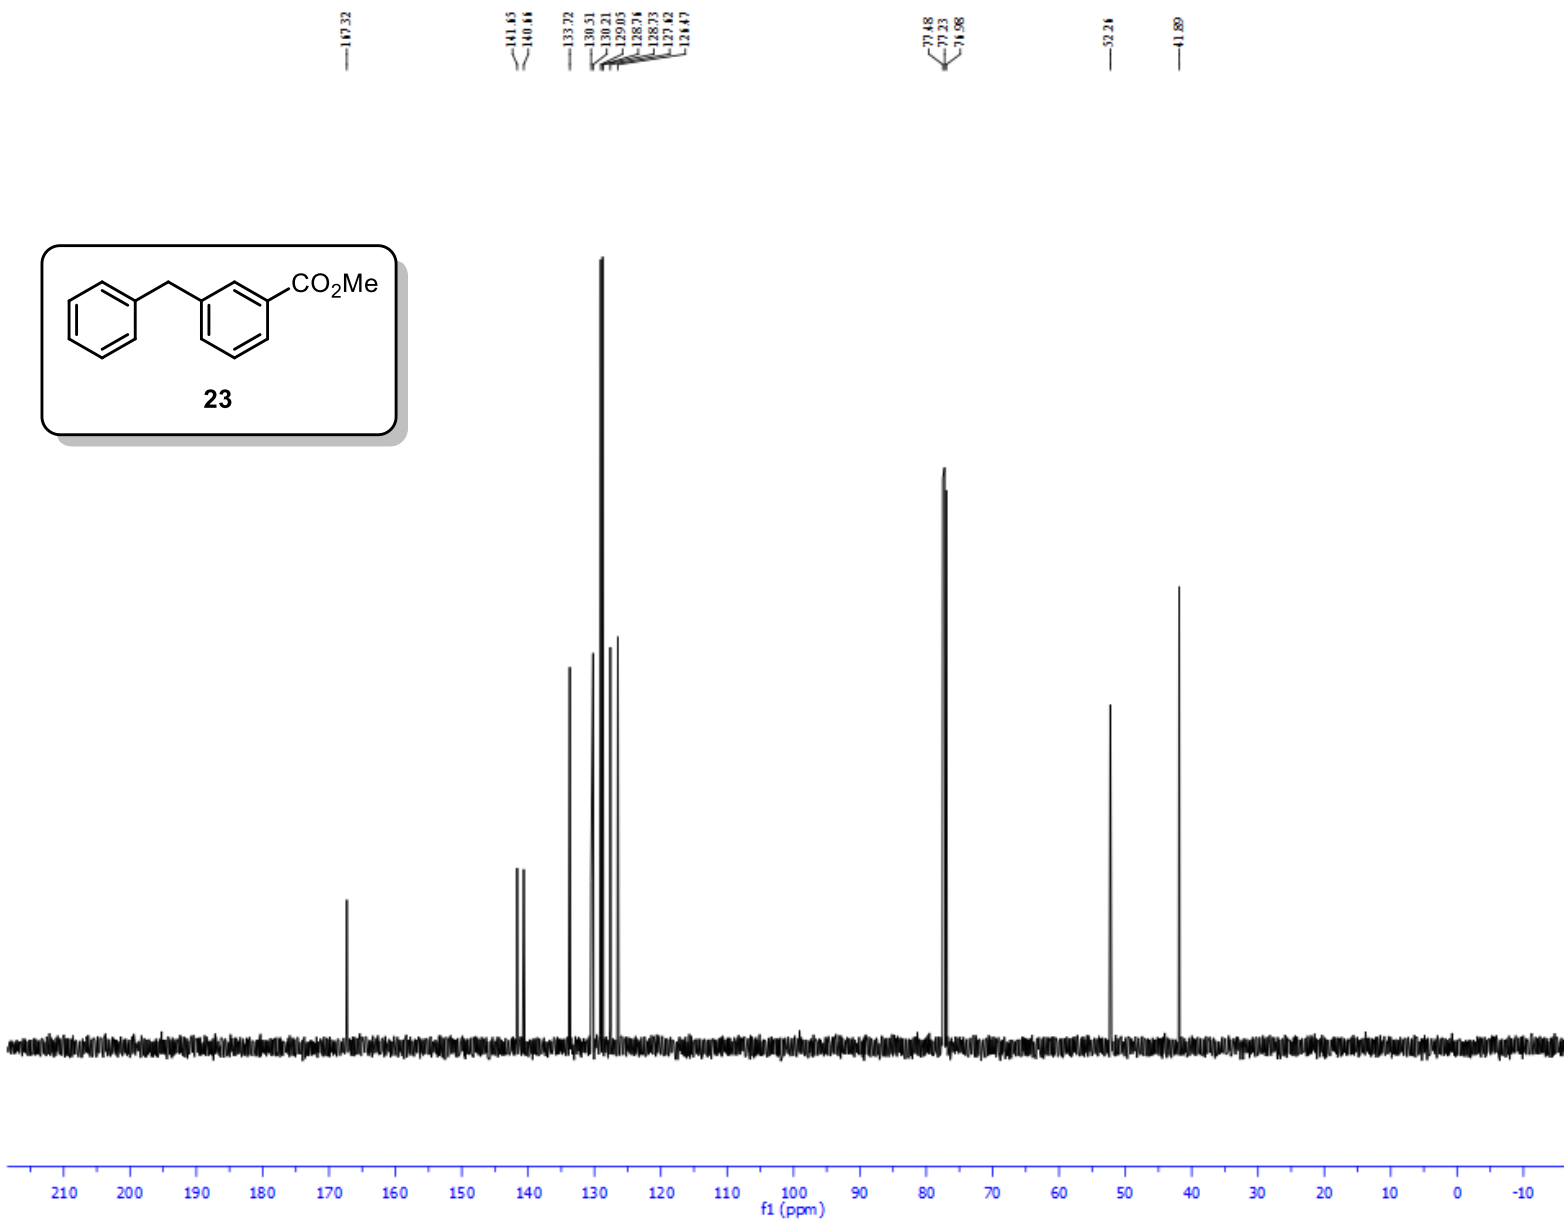

$^1\text{H}$  NMR ( $\text{CDCl}_3$ , 500 MHz) spectrum of 4-benzylbenzaldehyde (**24**)

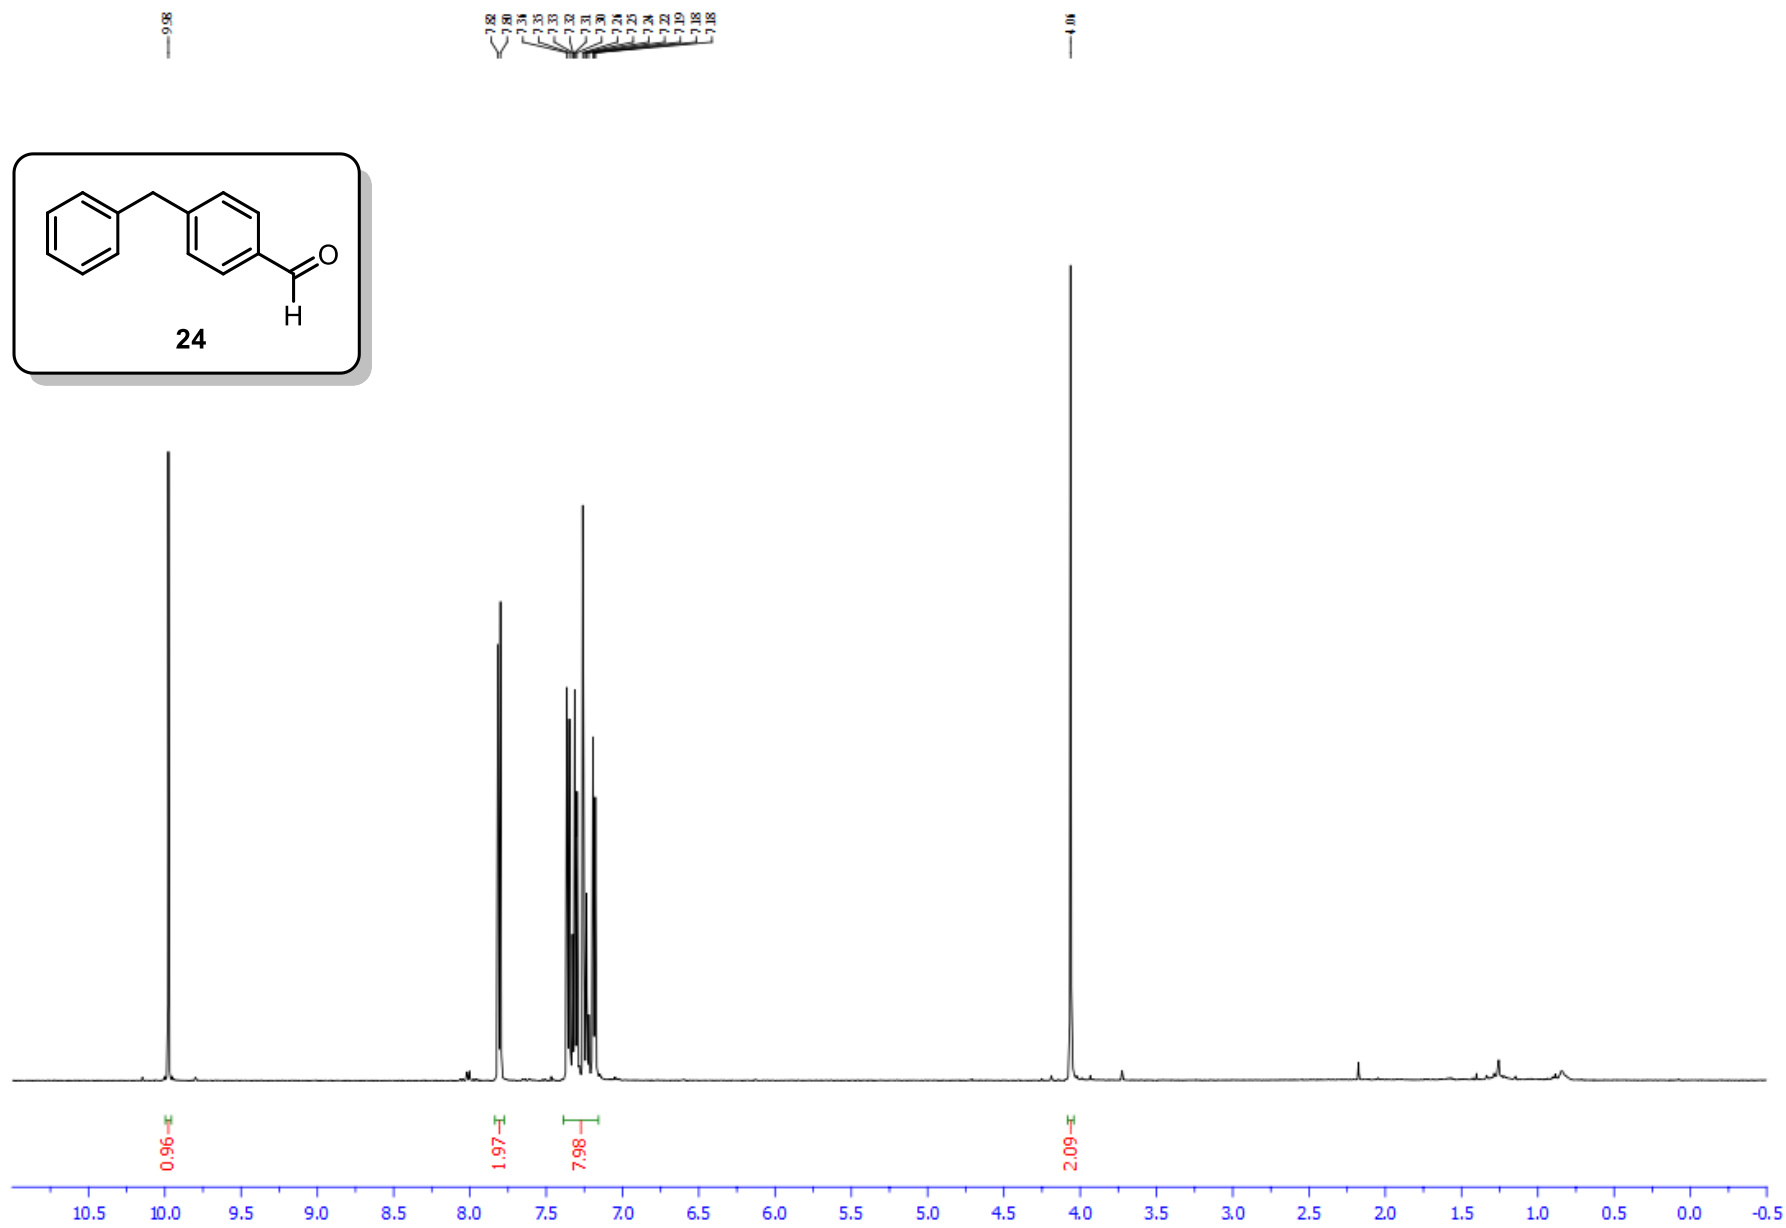

$^{13}\text{C}$  NMR ( $\text{CDCl}_3$ , 125.8 MHz) spectrum of 4-benzylbenzaldehyde (**24**)

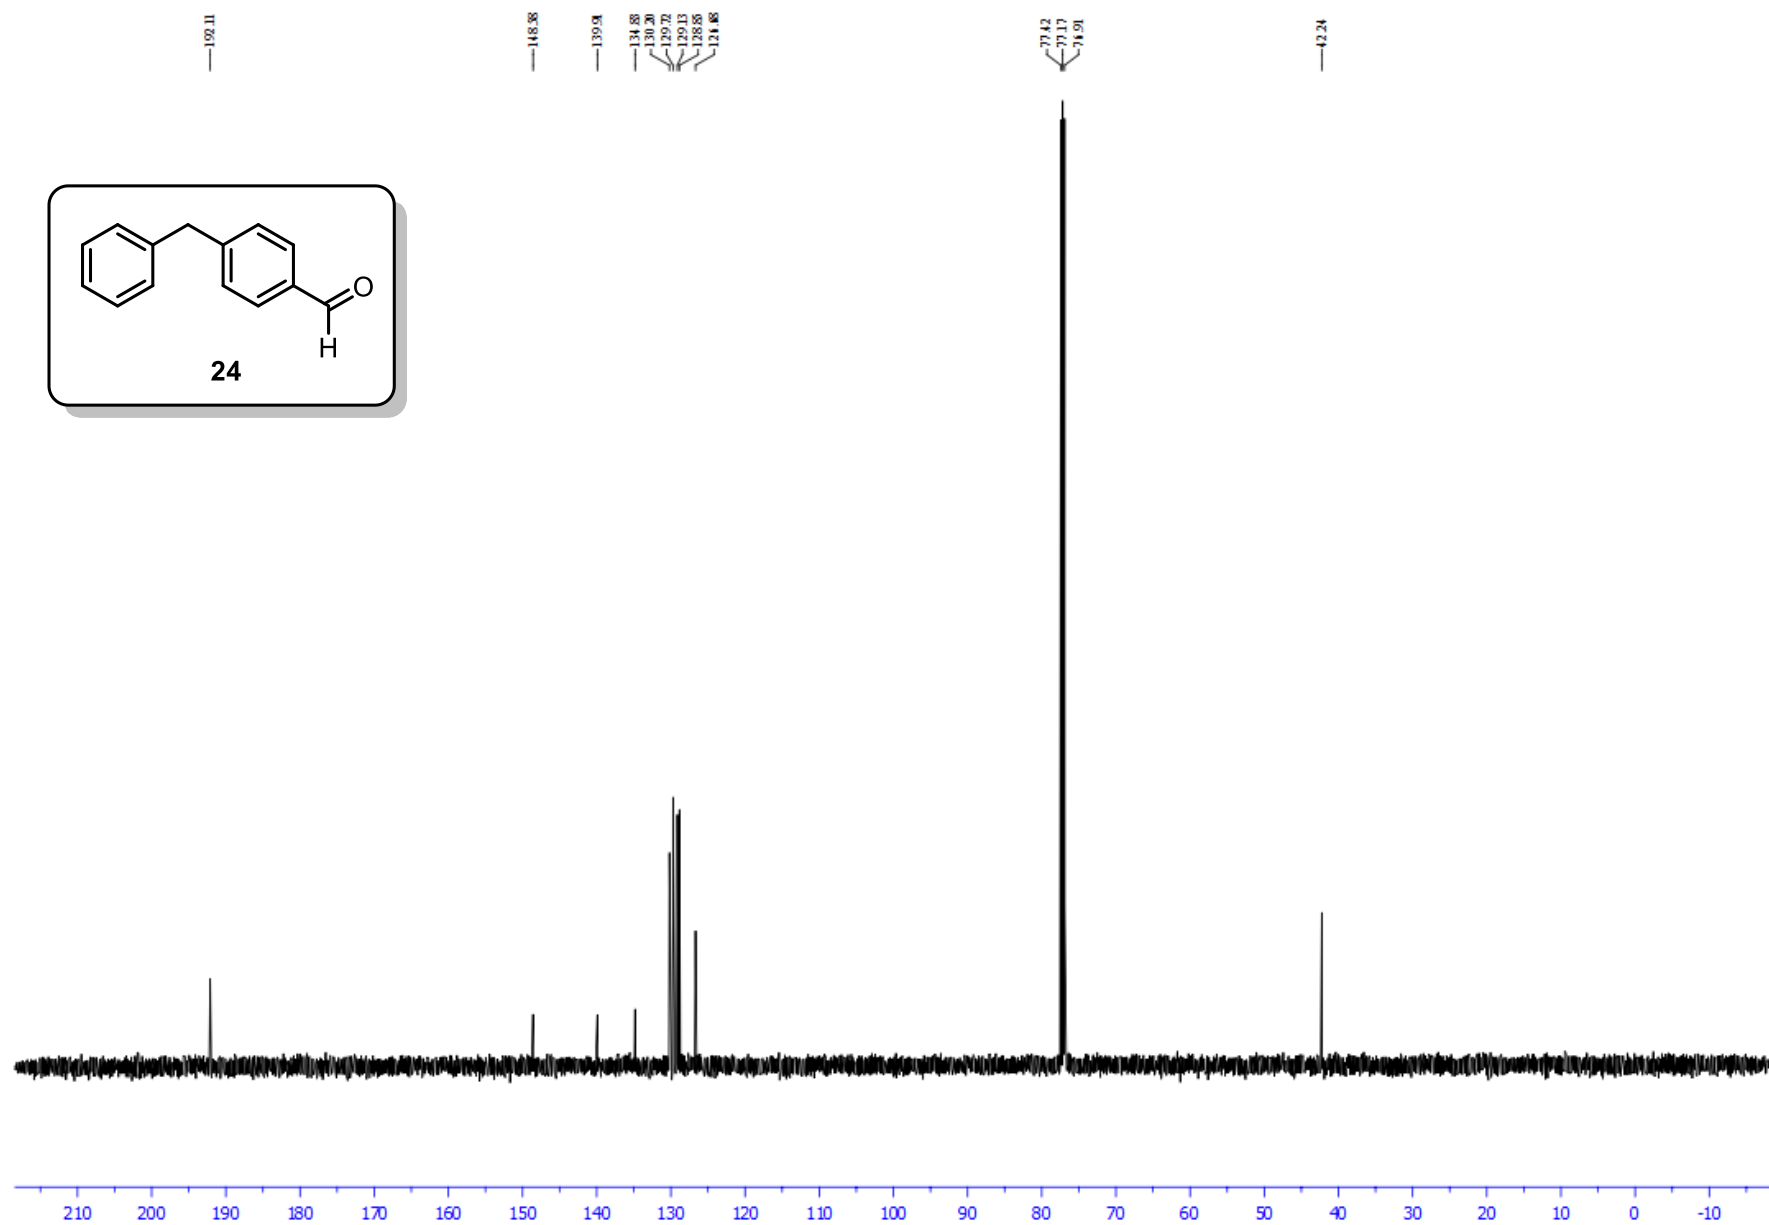

$^1\text{H}$  NMR ( $\text{CDCl}_3$ , 500 MHz) spectrum of 1-benzyl-2-methylbenzene (**25**)

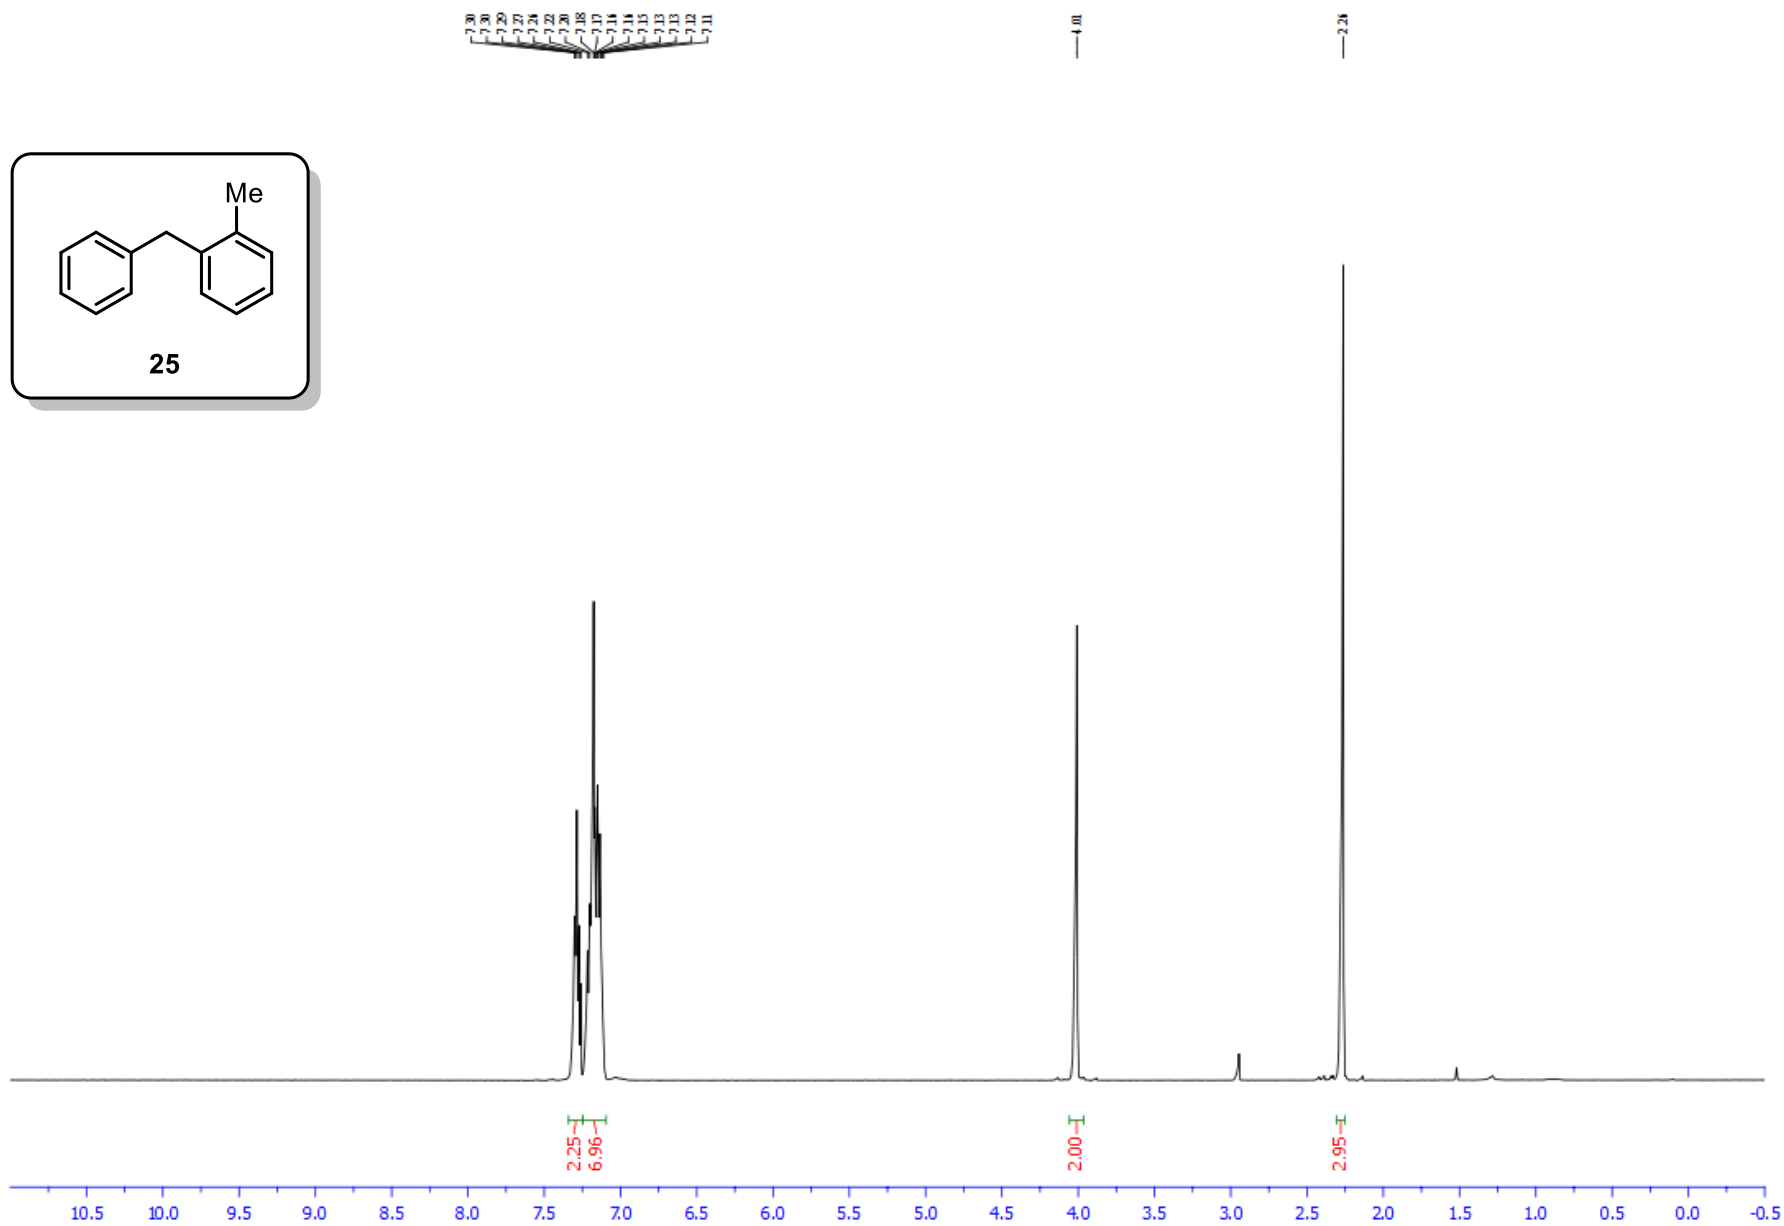

$^{13}\text{C}$  NMR ( $\text{CDCl}_3$ , 125.8 MHz) spectrum of 1-benzyl-2-methylbenzene (**25**)

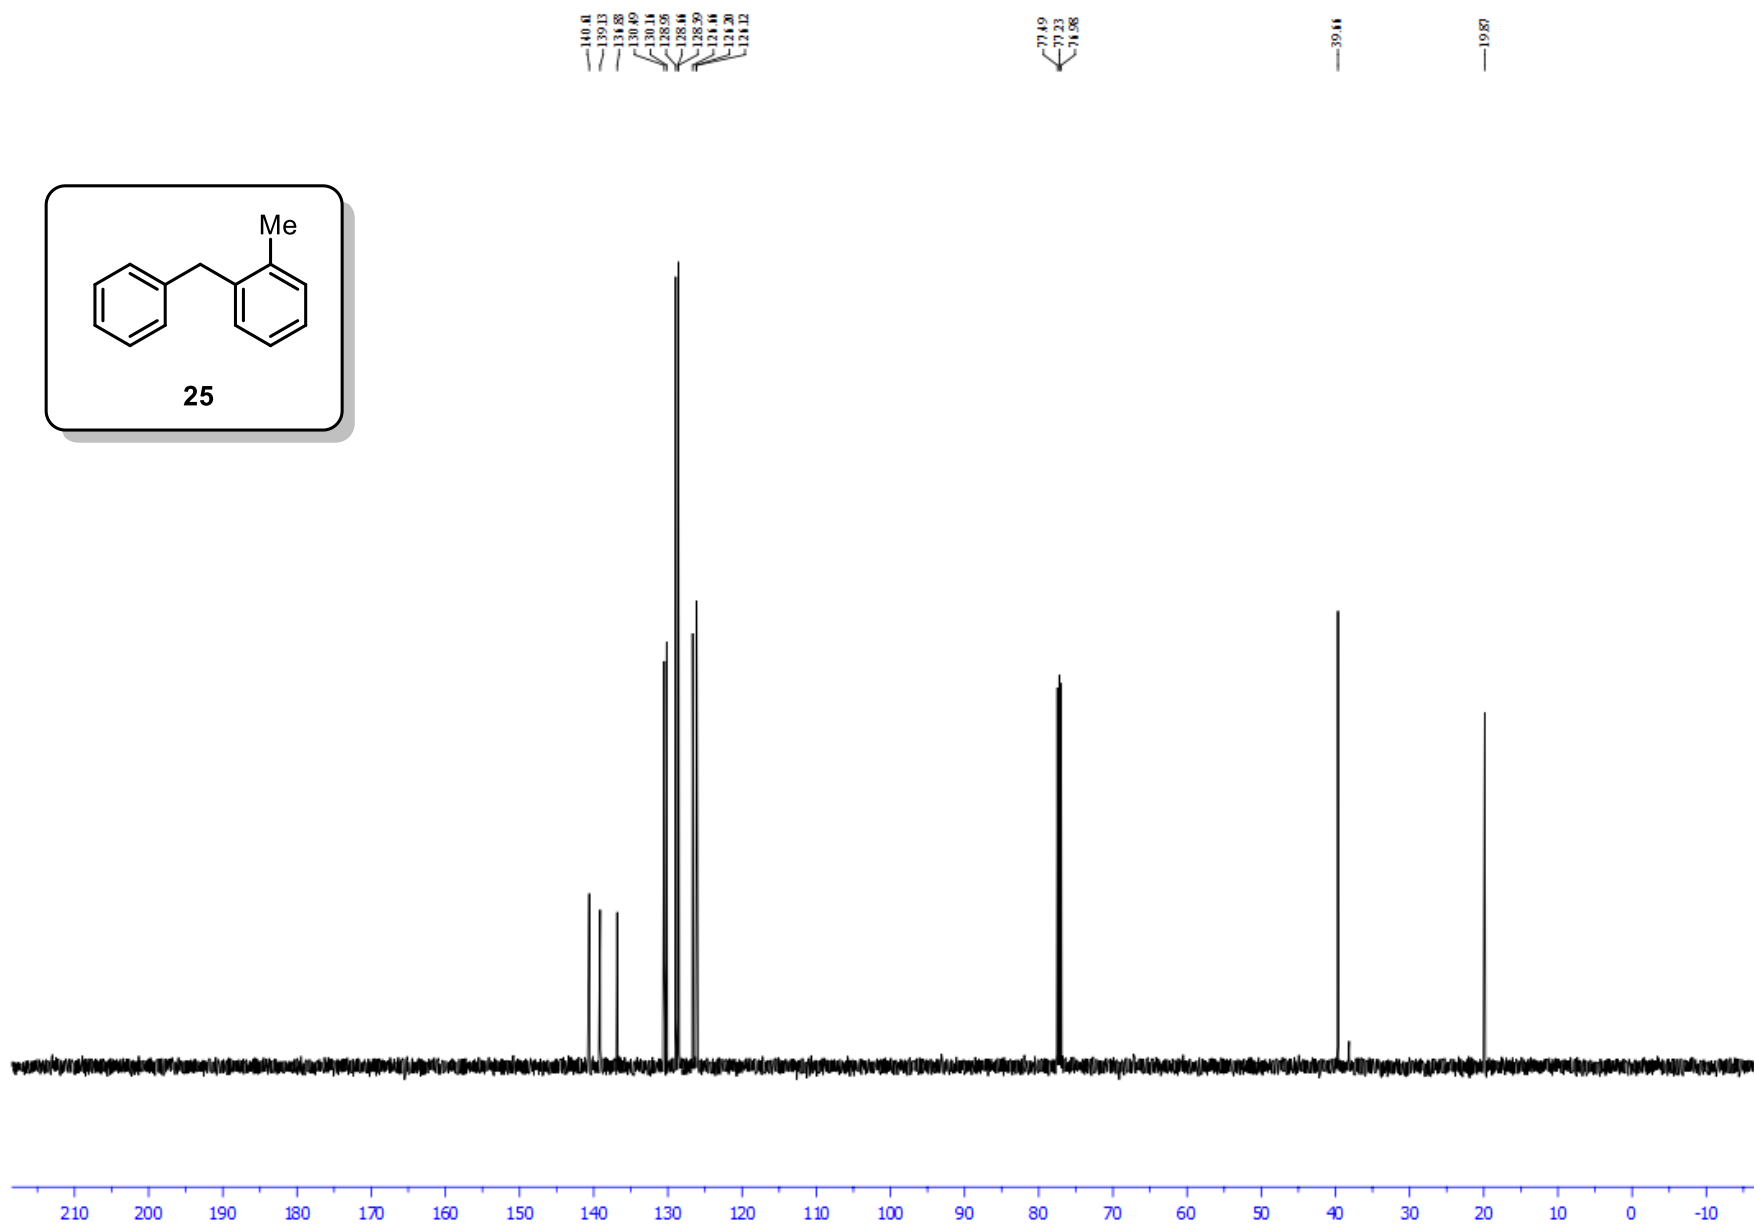

$^1\text{H}$  NMR ( $\text{CDCl}_3$ , 500 MHz) spectrum of 4-benzylphenol (**26**)

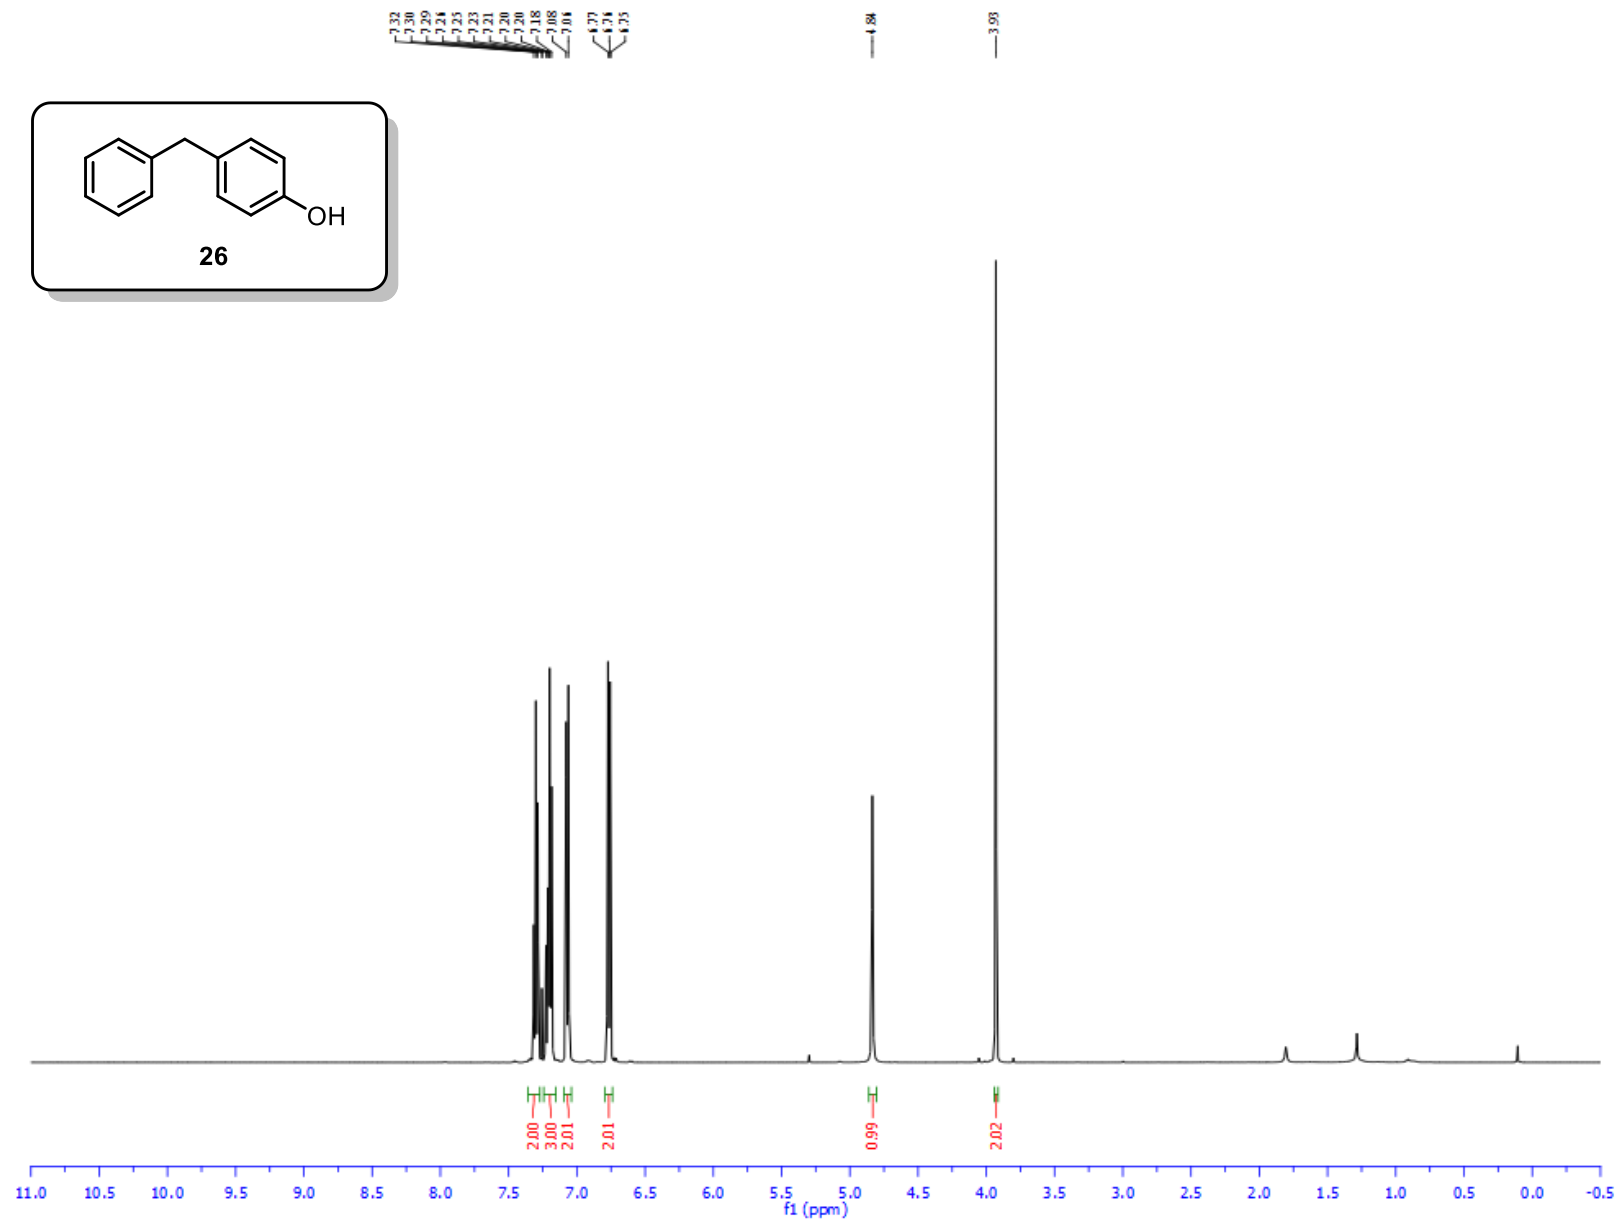



$^{13}\text{C}$  NMR ( $\text{CDCl}_3$ , 125.8 MHz) spectrum of 4-benzylphenol (**26**)

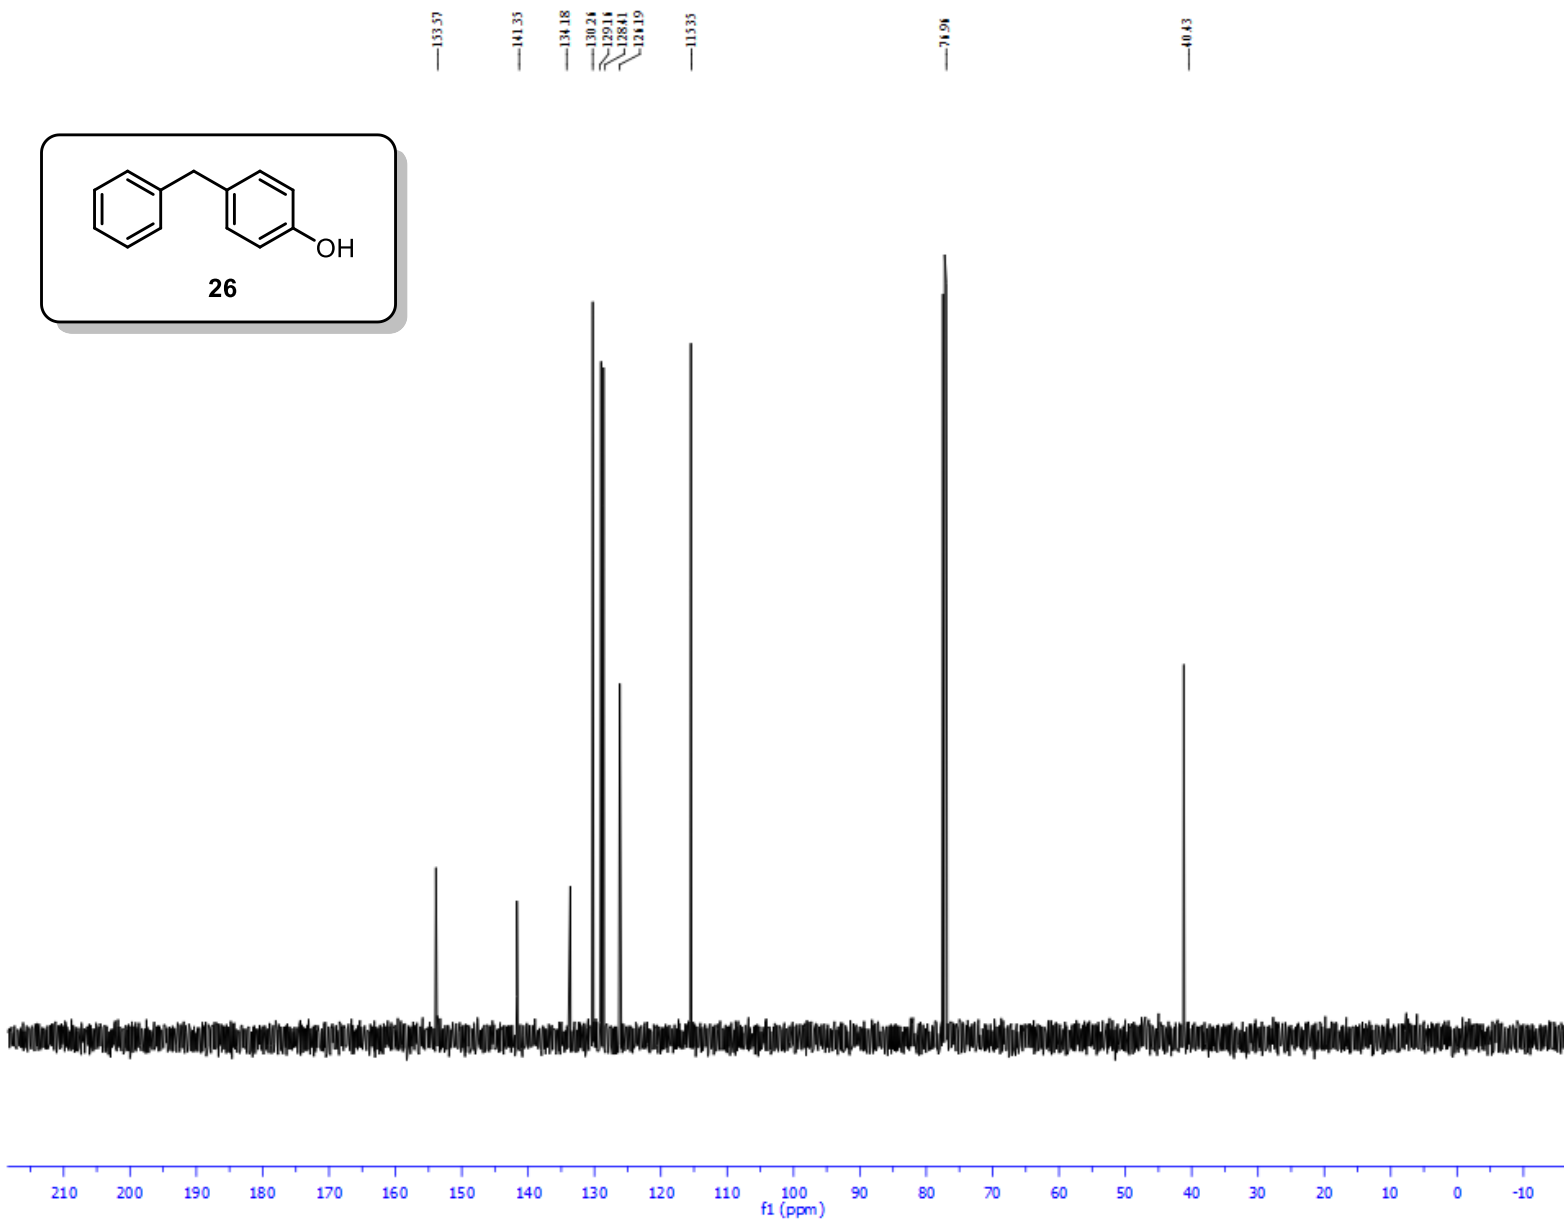

$^1\text{H}$  NMR ( $\text{CDCl}_3$ , 500 MHz) spectrum of N-(4-benzylphenyl)acetamide (**27**)

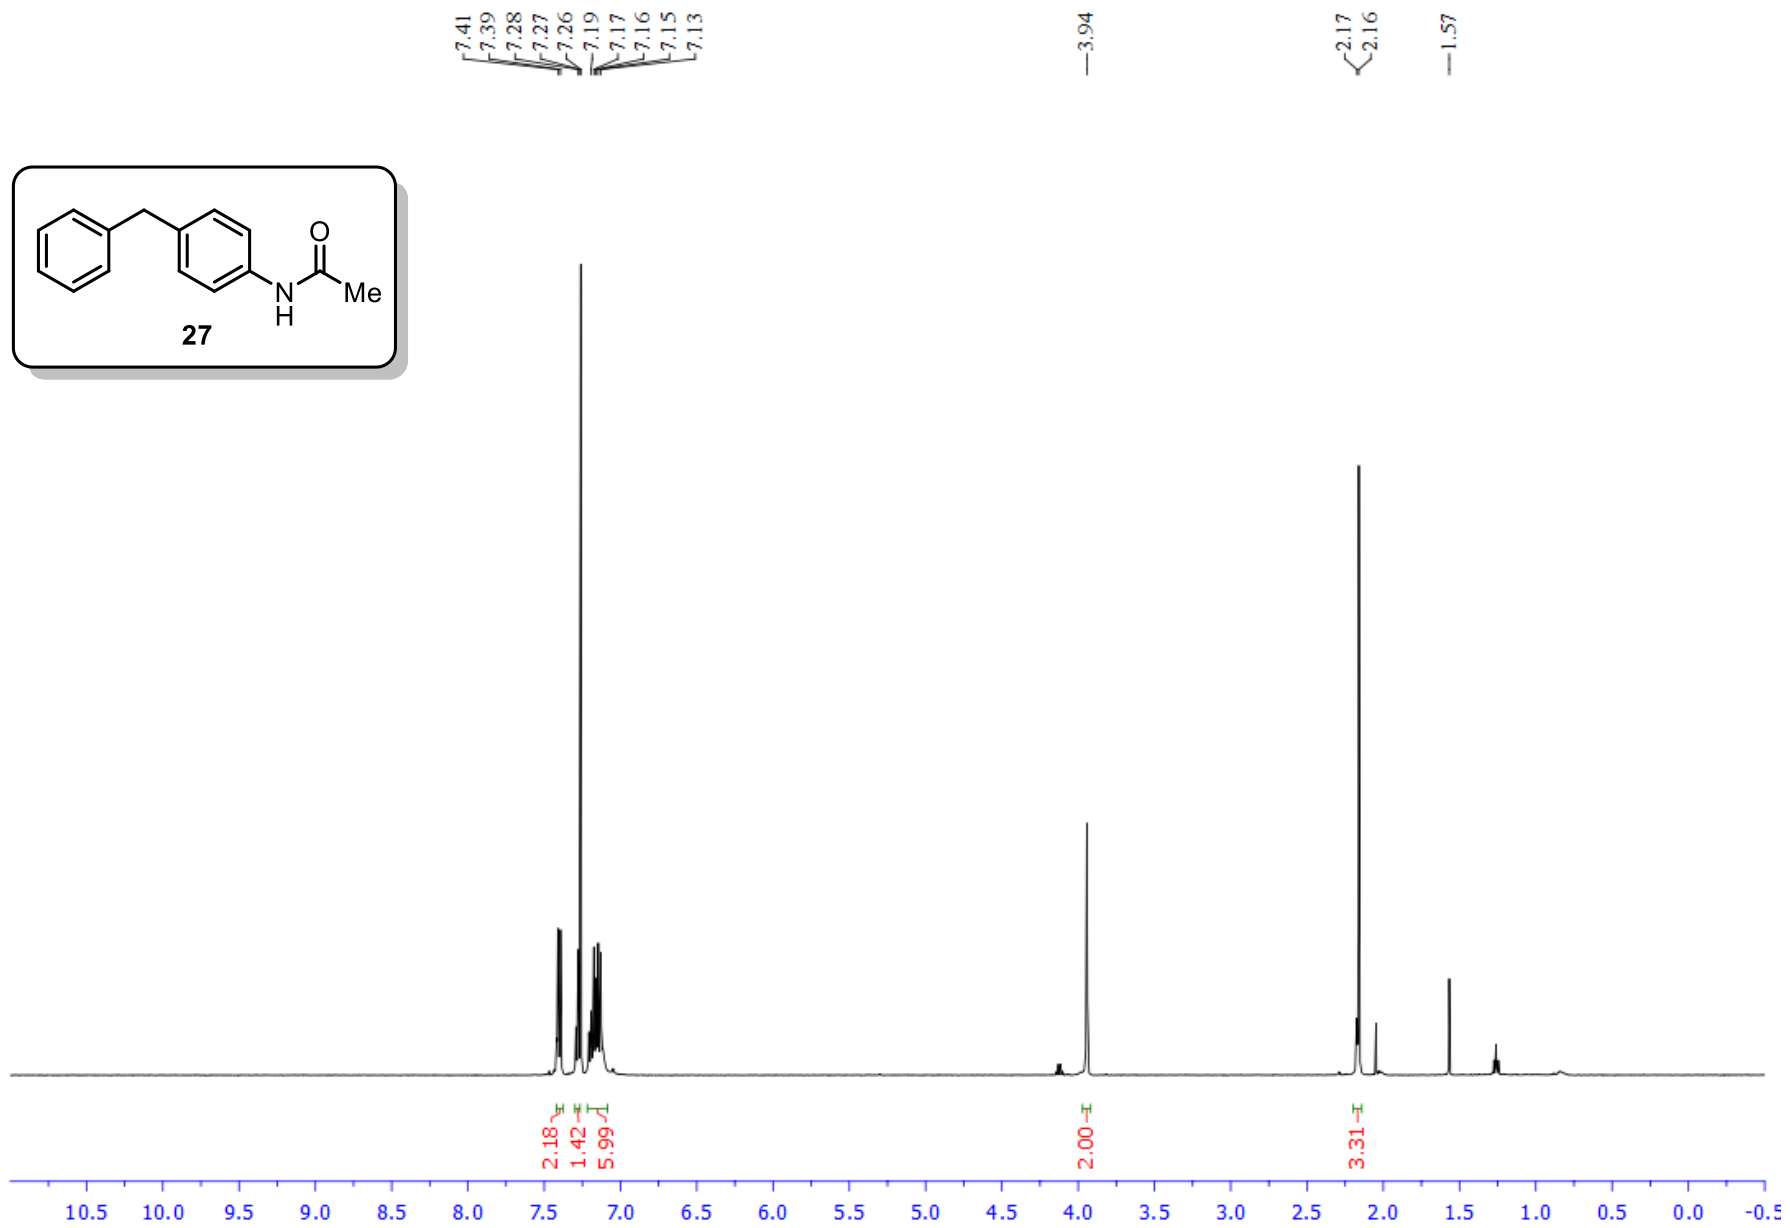

$^{13}\text{C}$  NMR ( $\text{CDCl}_3$ , 125.8 MHz) spectrum of N-(4-benzylphenyl)acetamide (**27**)

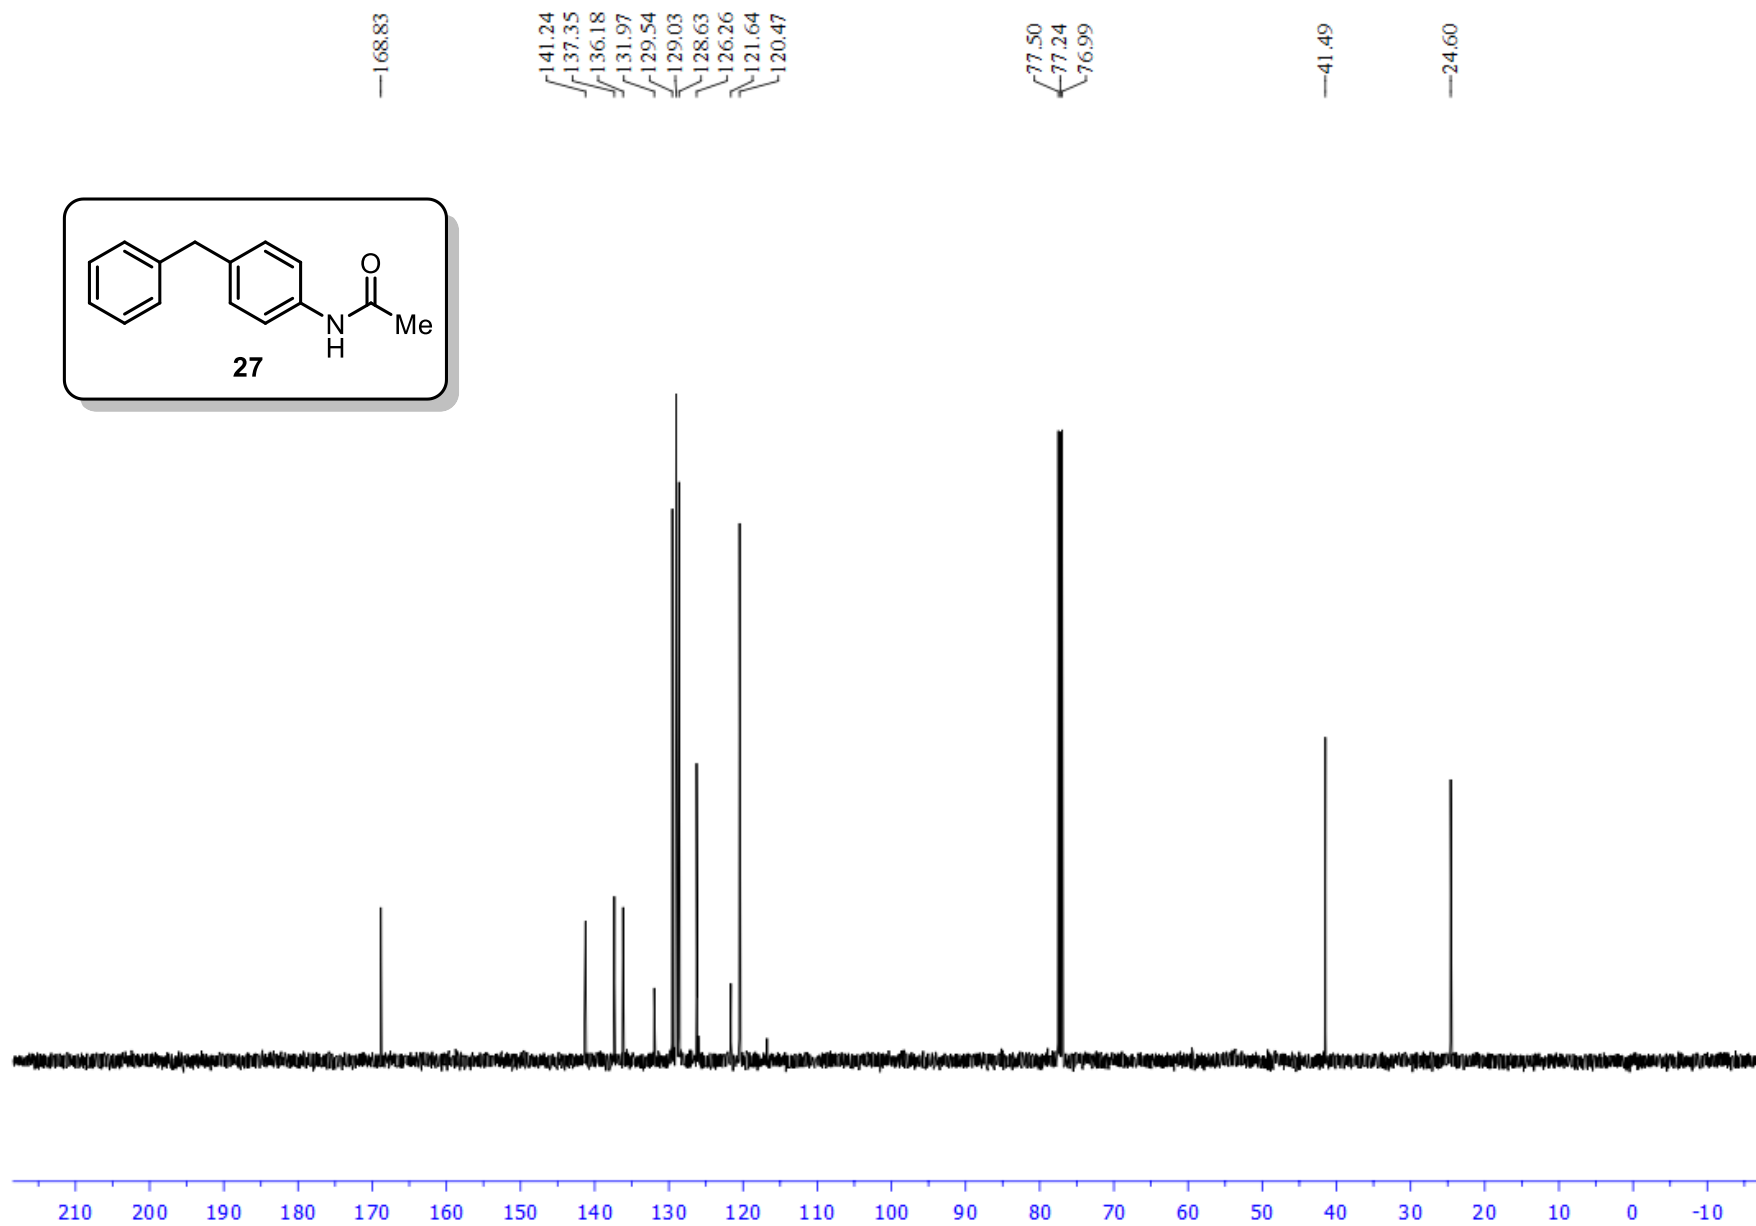

$^1\text{H}$  NMR ( $\text{CDCl}_3$ , 500 MHz) spectrum of methyl (*S*)-3-(4-benzylphenyl)-2-((*tert*-butoxycarbonyl)amino)propanoate (**28**)

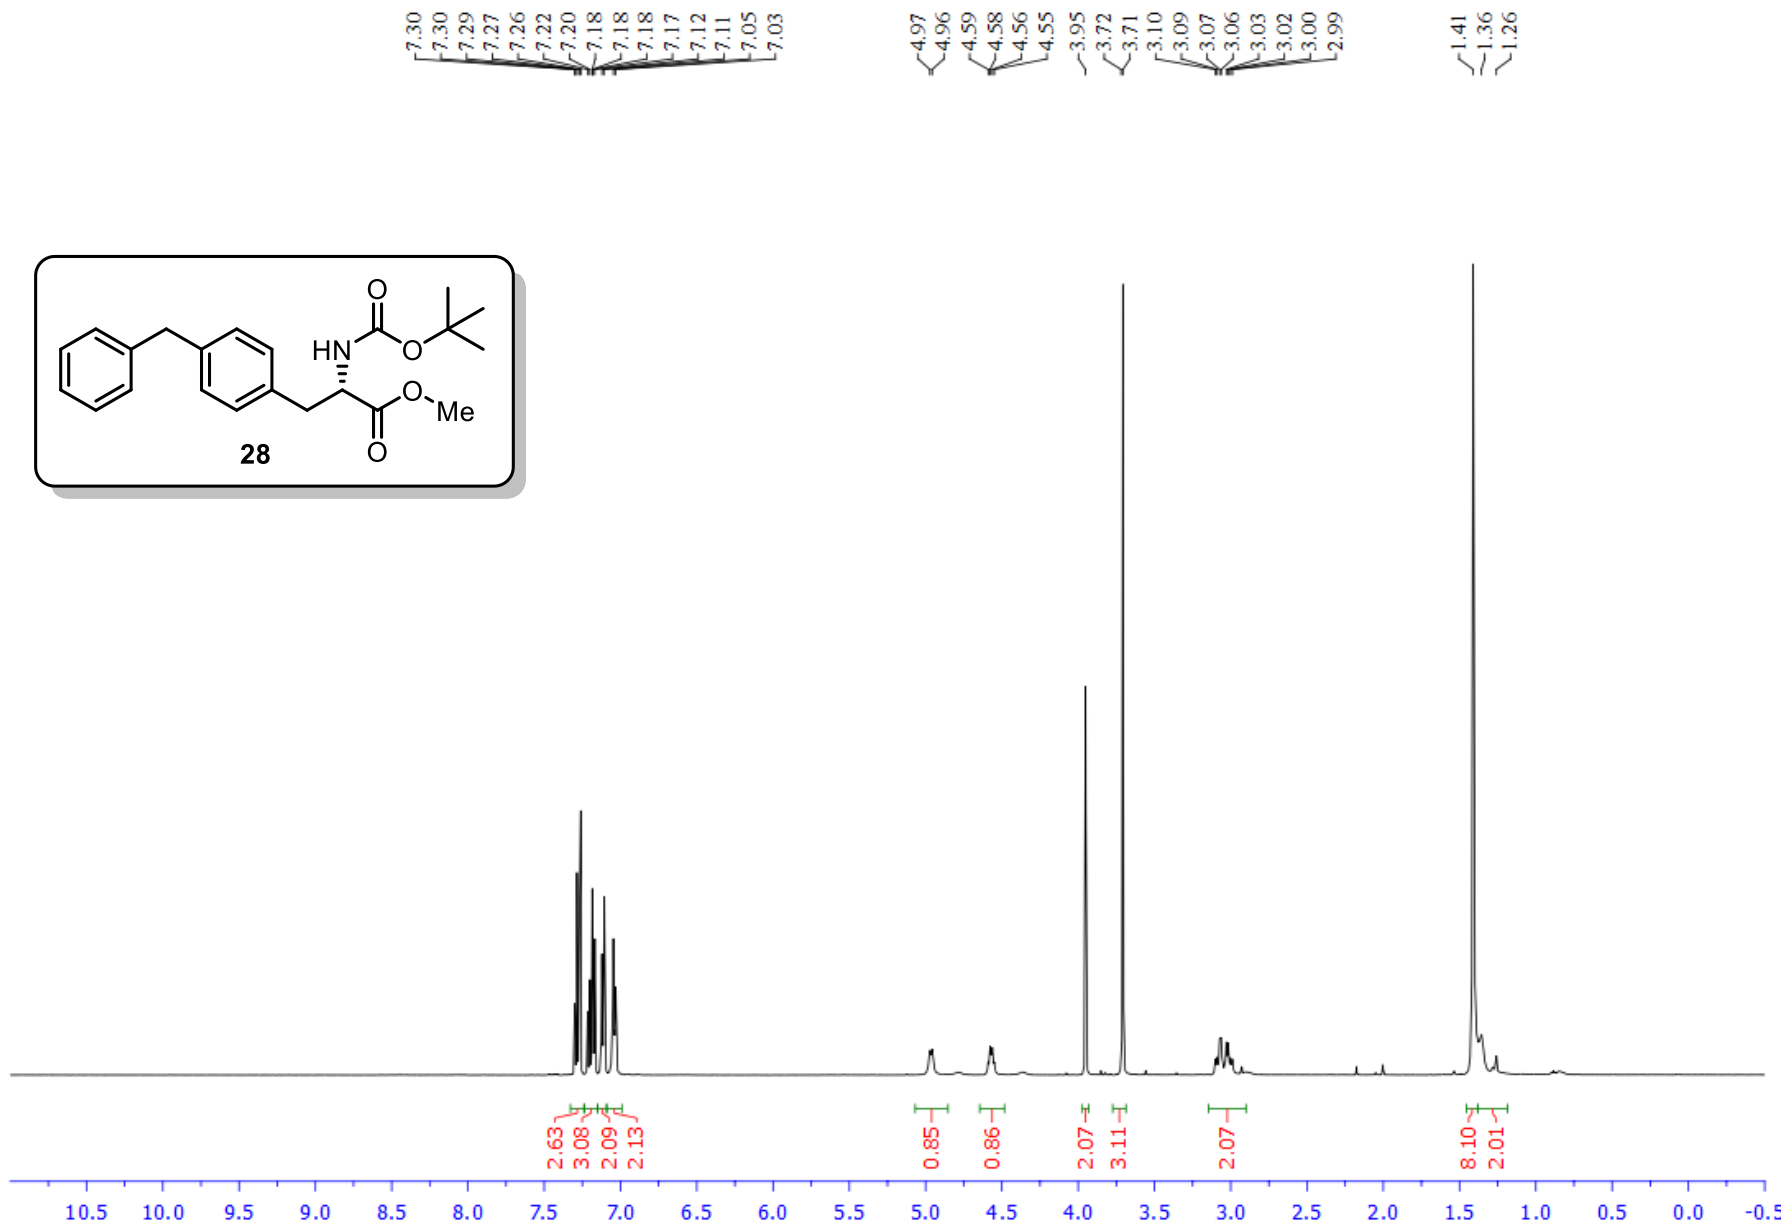

$^{13}\text{C}$  NMR ( $\text{CDCl}_3$ , 125.8 MHz) spectrum of methyl (S)-3-(4-benzylphenyl)-2-((tert-butoxycarbonyl)amino)propanoate (**28**)

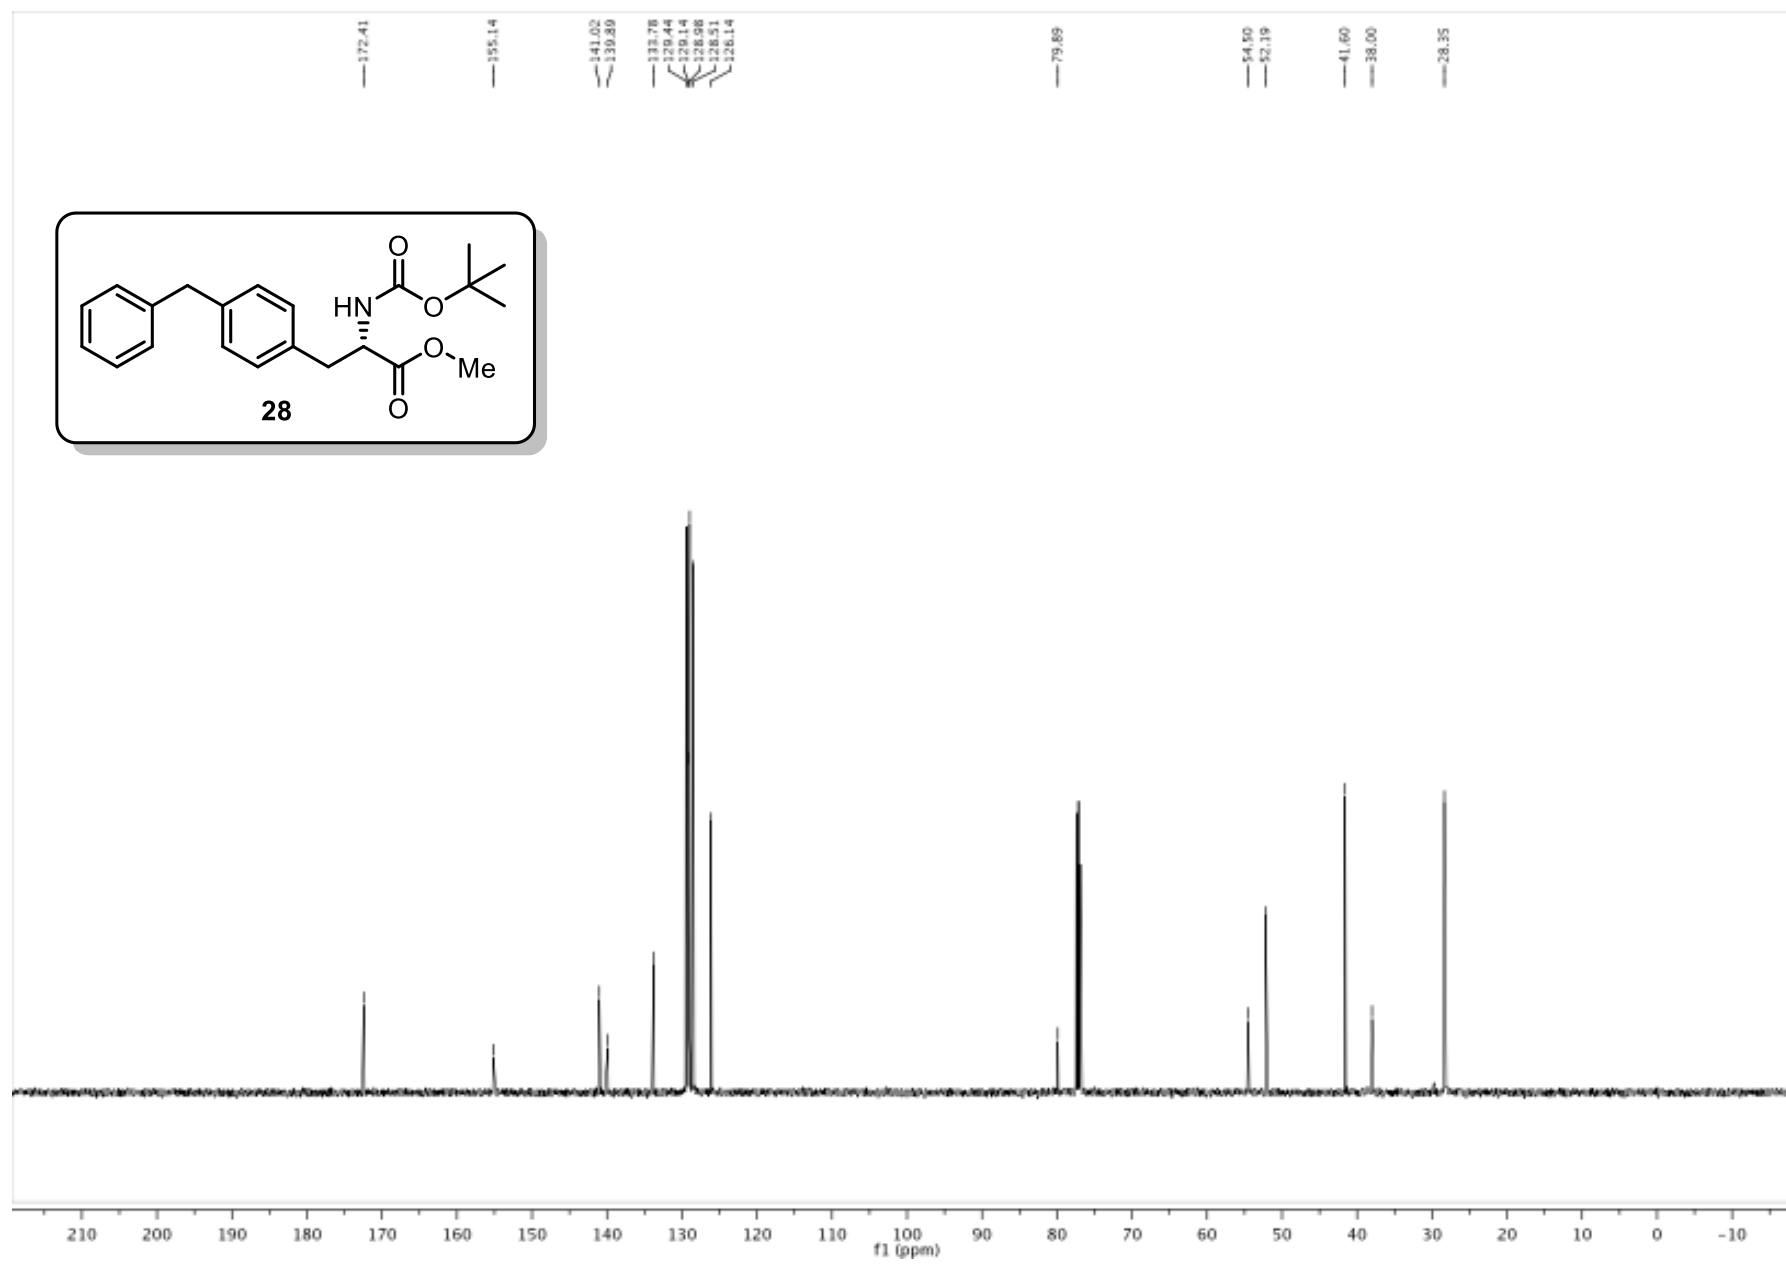

Chiral SFC (AD-H column: 10% MeOH in CO<sub>2</sub>, 5.0 mL/min) spectrum of methyl (S)-3-(4-benzylphenyl)-2-((tert-butoxycarbonyl)amino)propanoate (**28**)

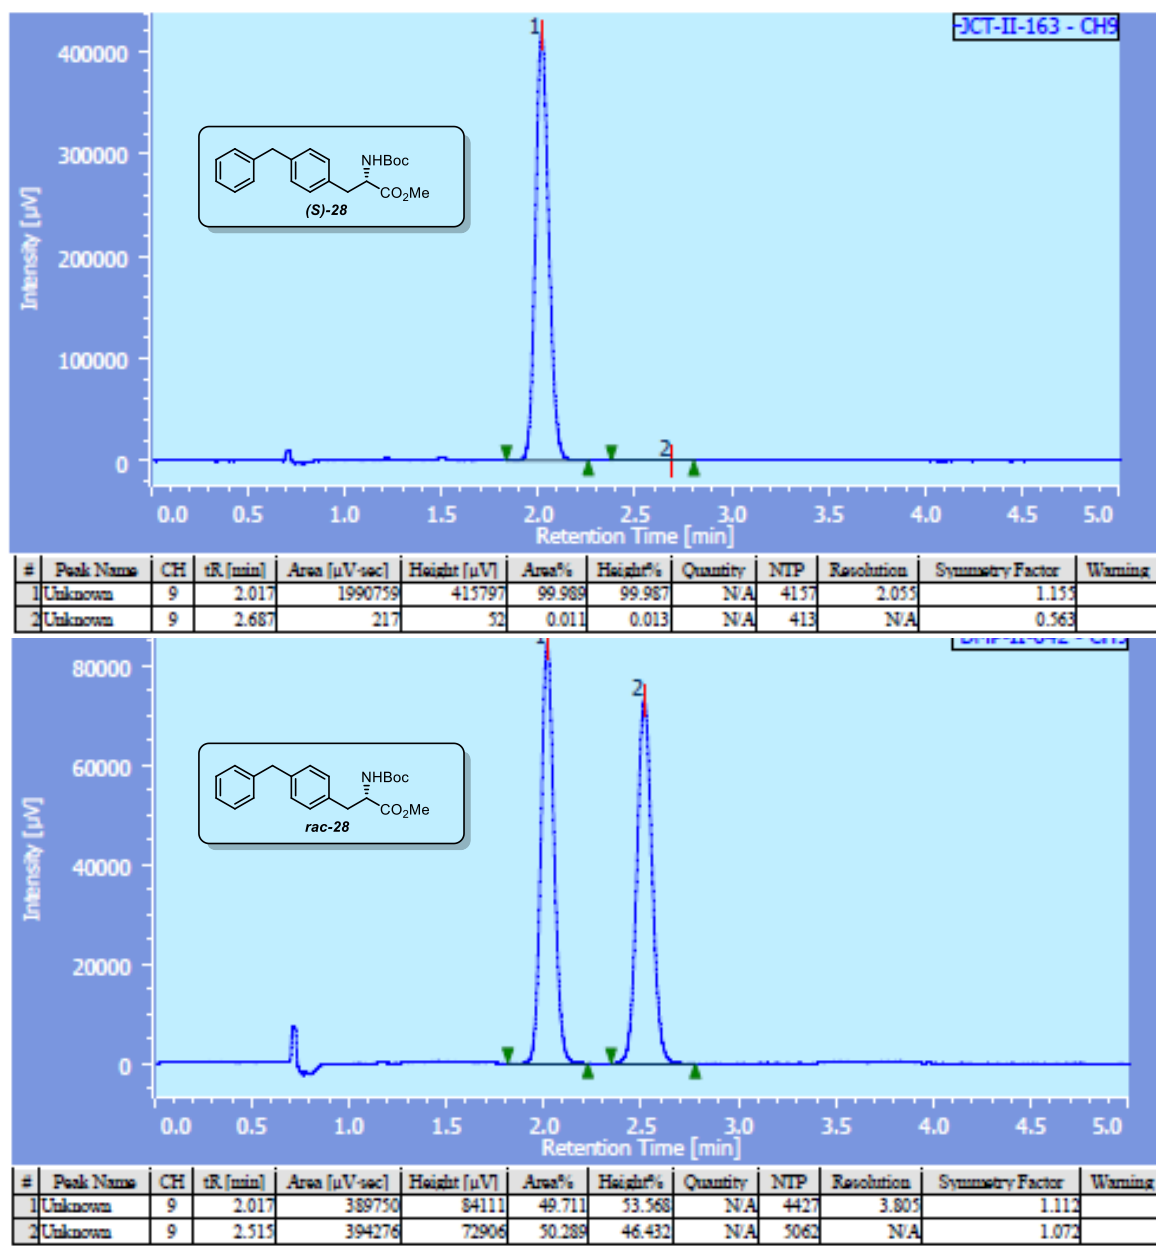

$^1\text{H}$  NMR ( $\text{CDCl}_3$ , 500 MHz) spectrum of 3-benzyl-5-methoxypyridine (**29**)

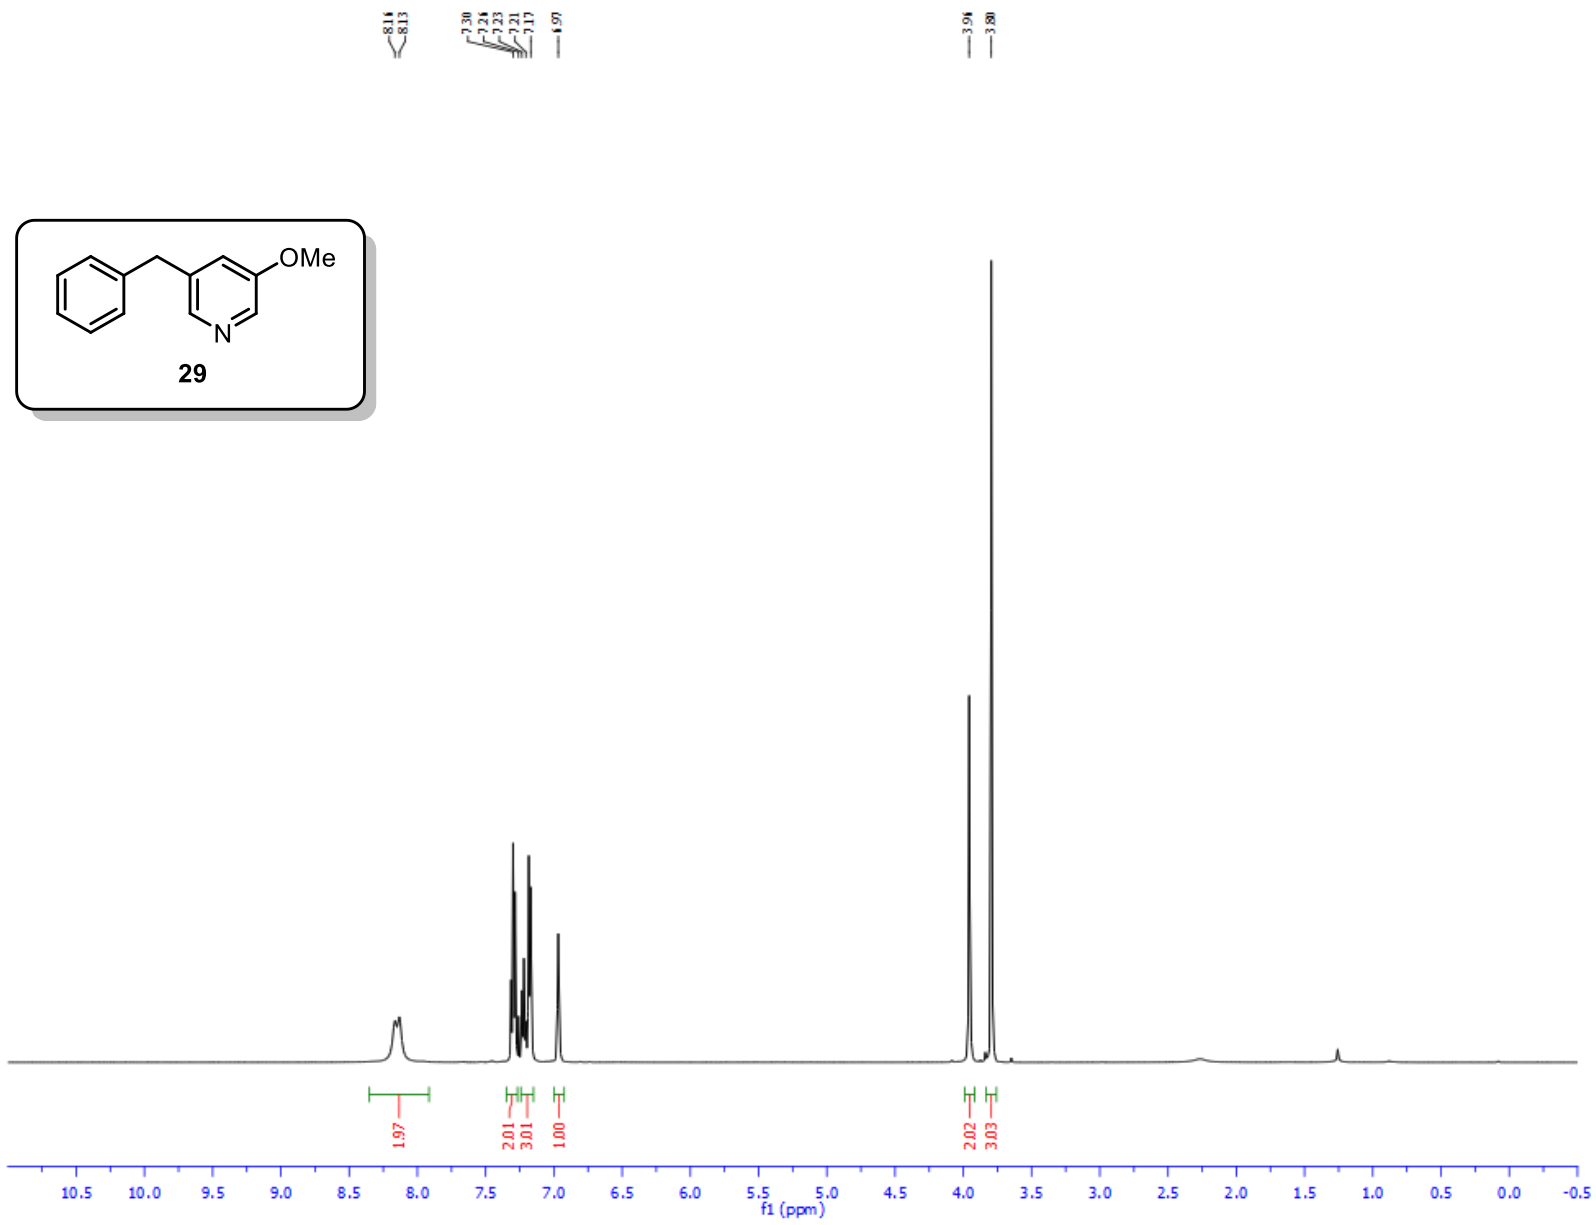

$^{13}\text{C}$  NMR ( $\text{CDCl}_3$ , 125.8 MHz) spectrum of 3-benzyl-5-methoxypyridine (**29**)

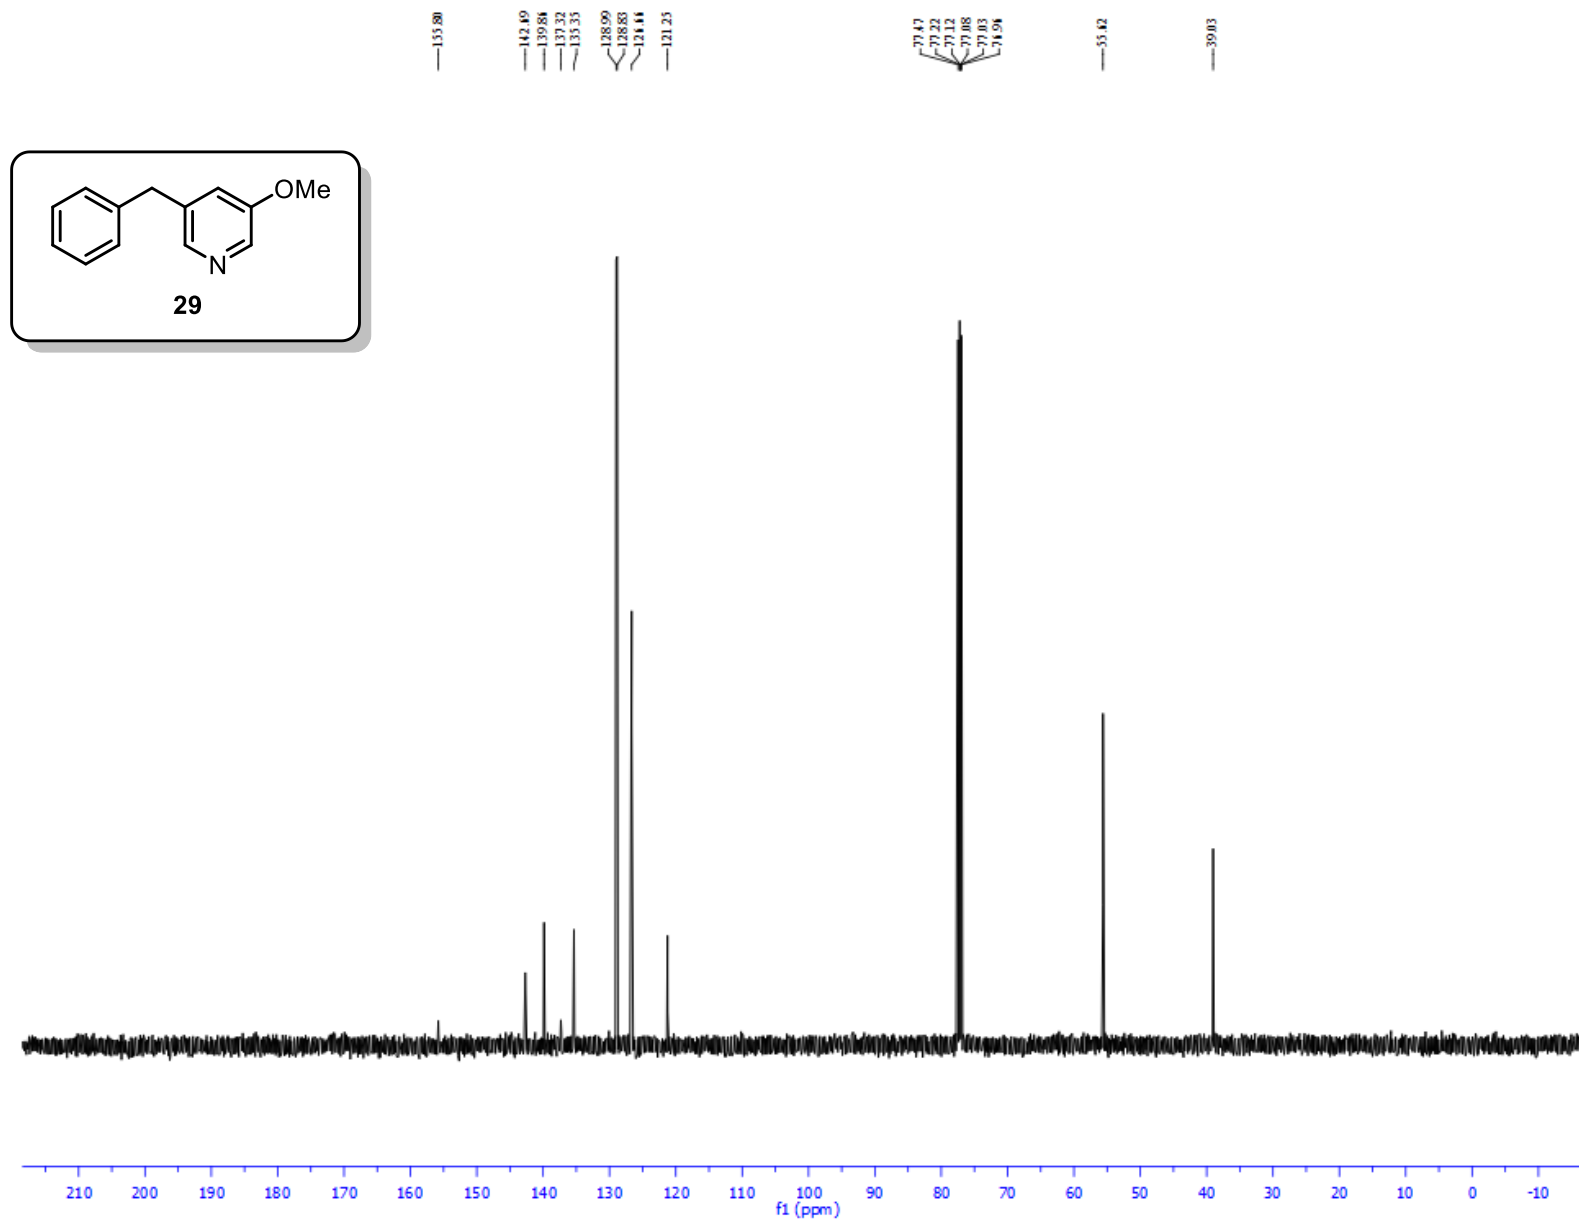



$^1\text{H}$  NMR ( $\text{CDCl}_3$ , 500 MHz) spectrum of 5-benzylpicolinonitrile (**30**)

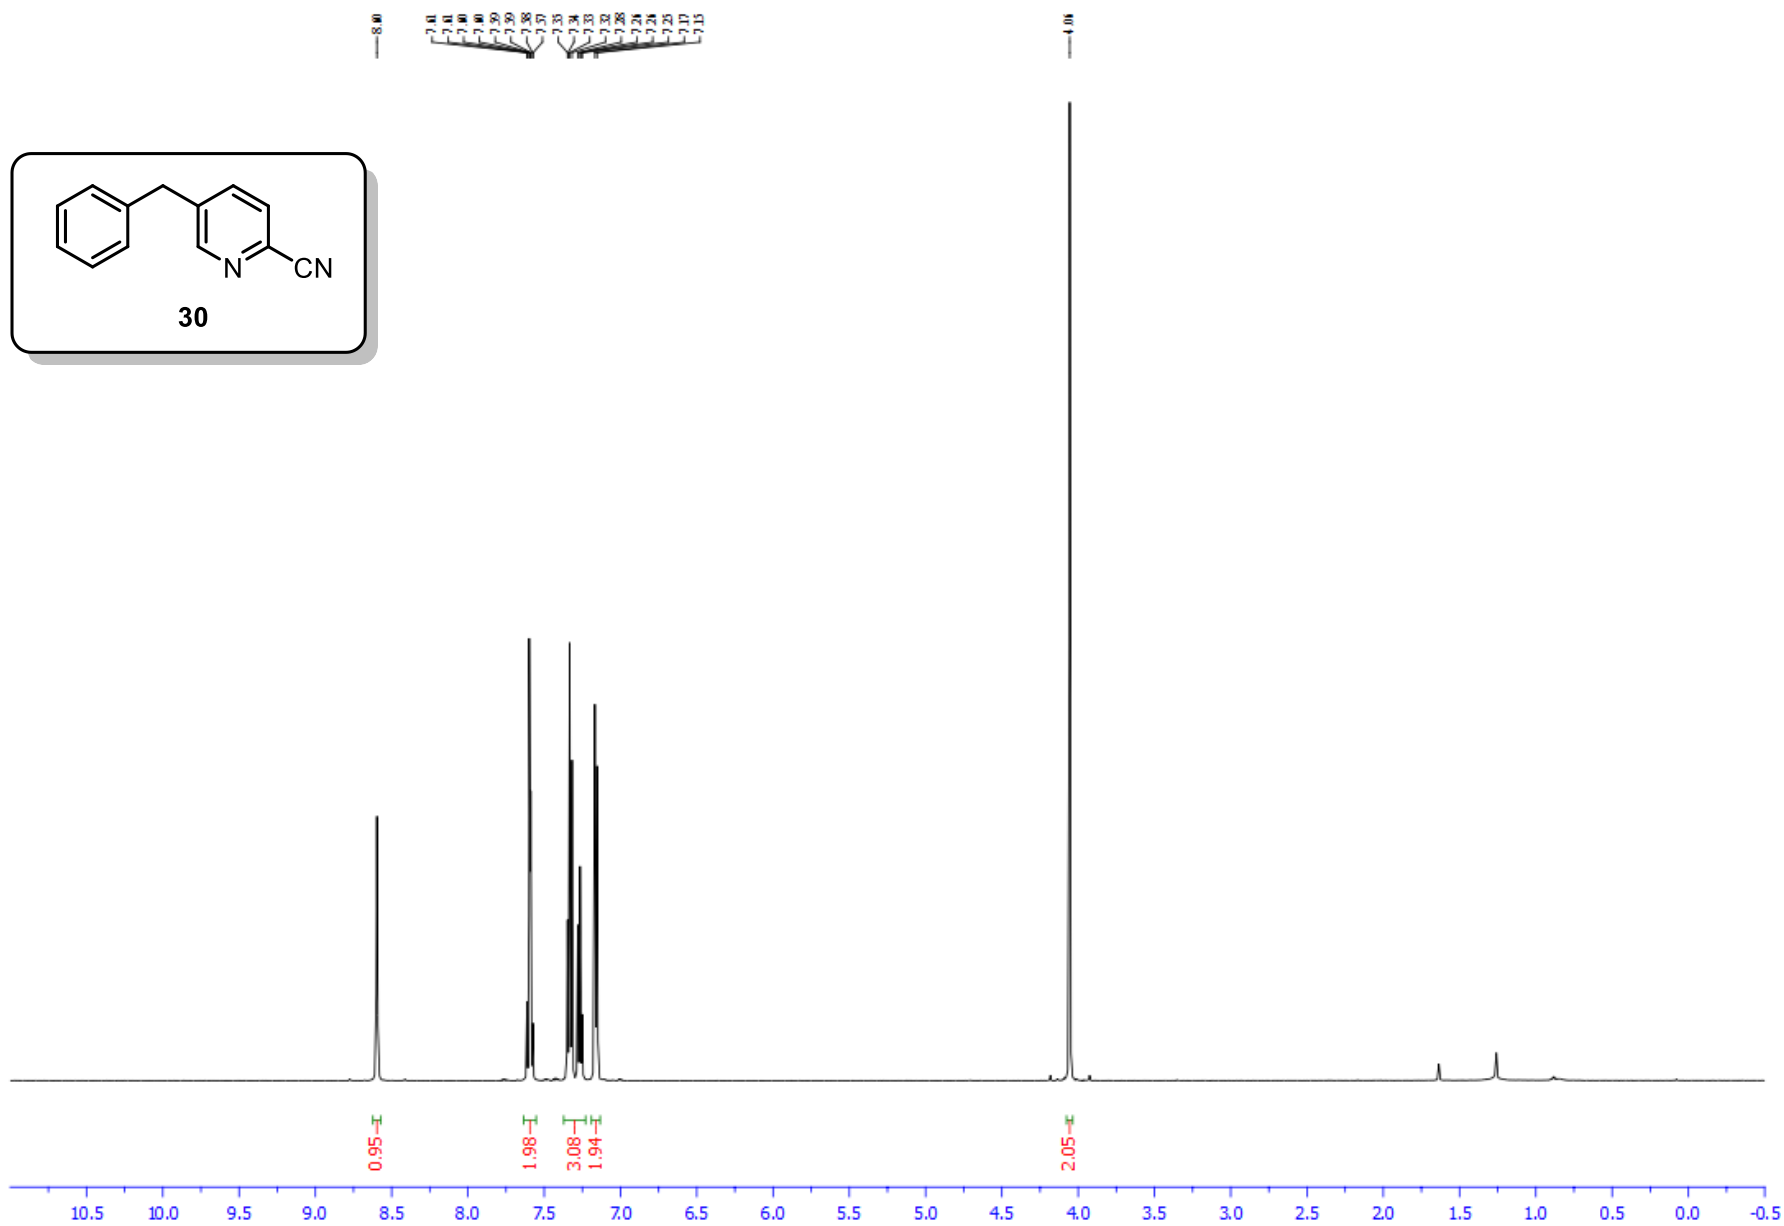

$^{13}\text{C}$  NMR ( $\text{CDCl}_3$ , 125.8 MHz) spectrum of 5-benzylpicolinonitrile (**30**)

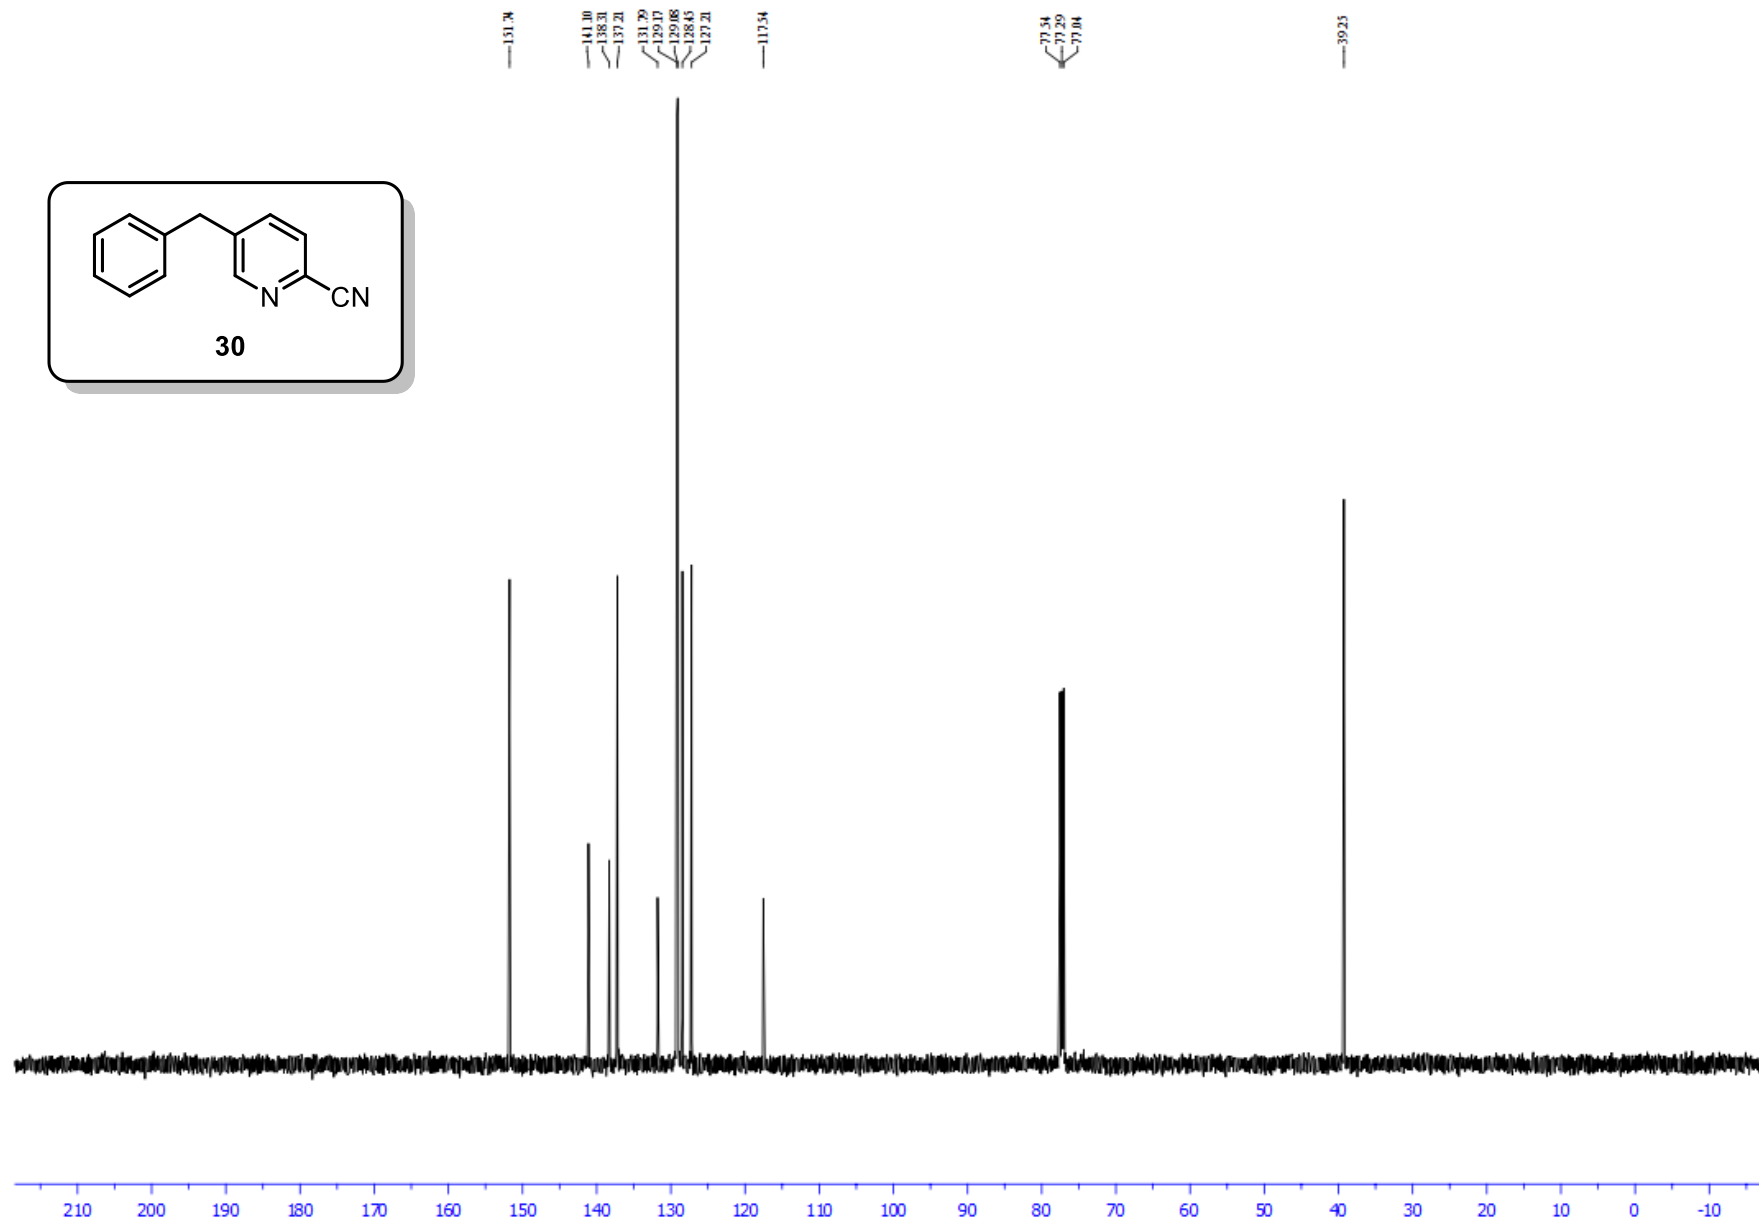

<sup>1</sup>H NMR (CDCl<sub>3</sub>, 500 MHz) spectrum of 2-benzyl-5-(trifluoromethyl)pyridine (**31**)

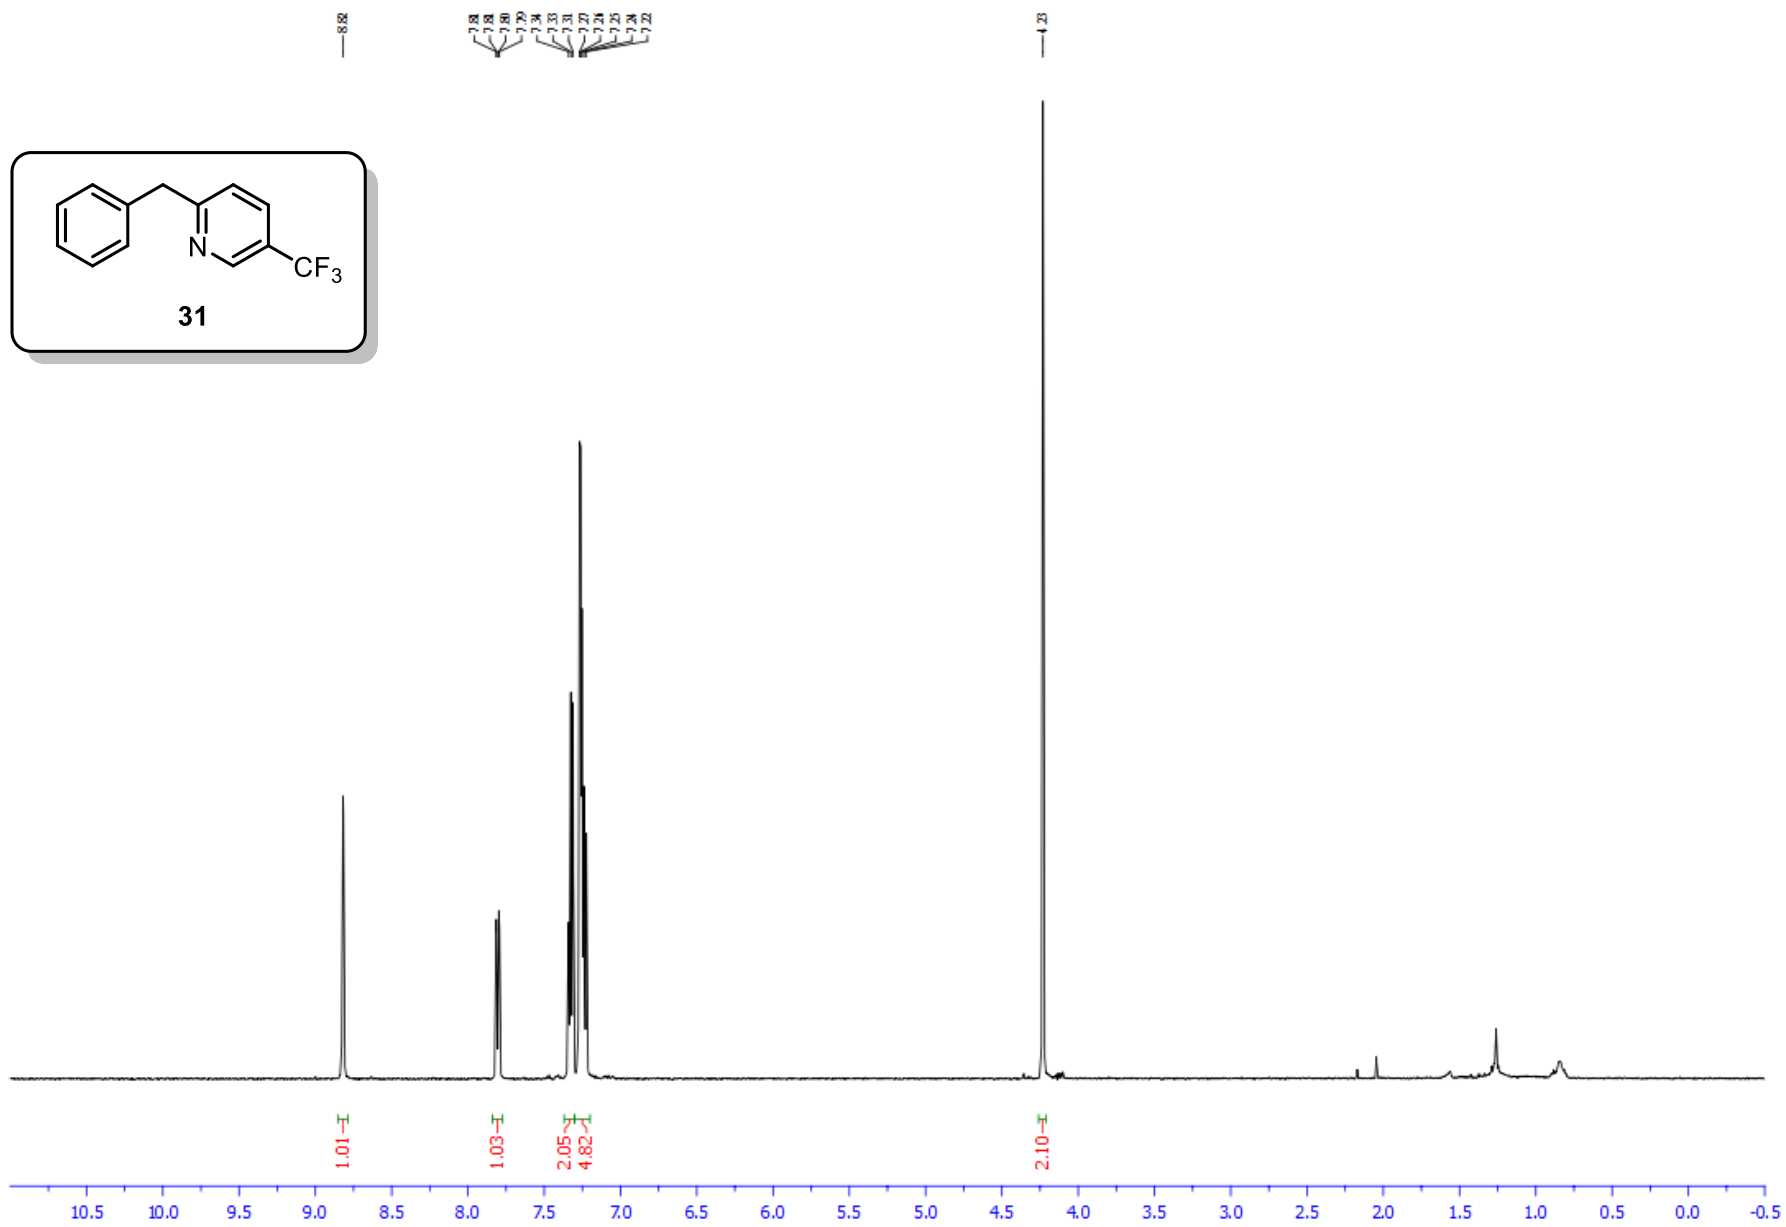

$^{13}\text{C}$  NMR ( $\text{CDCl}_3$ , 125.8 MHz) spectrum of 2-benzyl-5-(trifluoromethyl)pyridine (**31**)

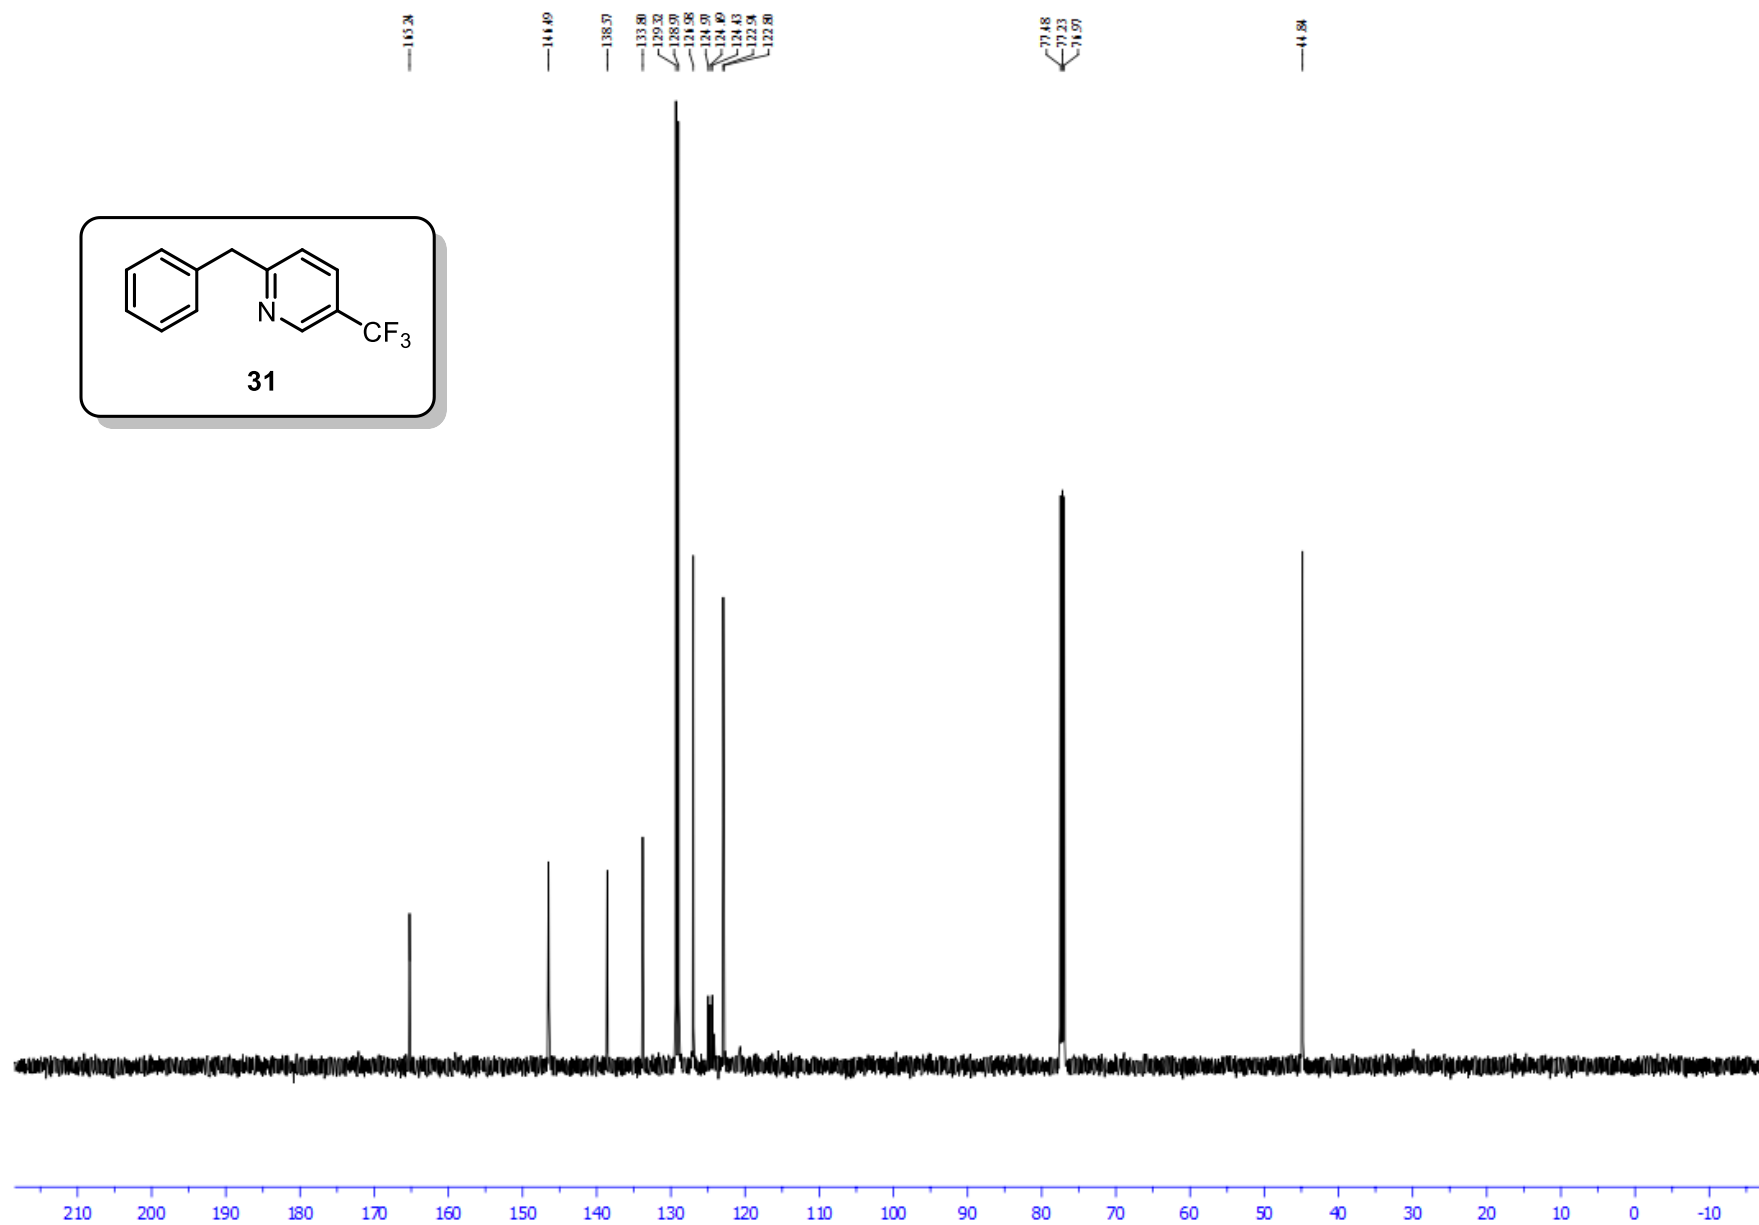

$^{19}\text{F}$  NMR ( $\text{CDCl}_3$ , 470.8 MHz) spectrum of 2-benzyl-5-(trifluoromethyl)pyridine (**31**)

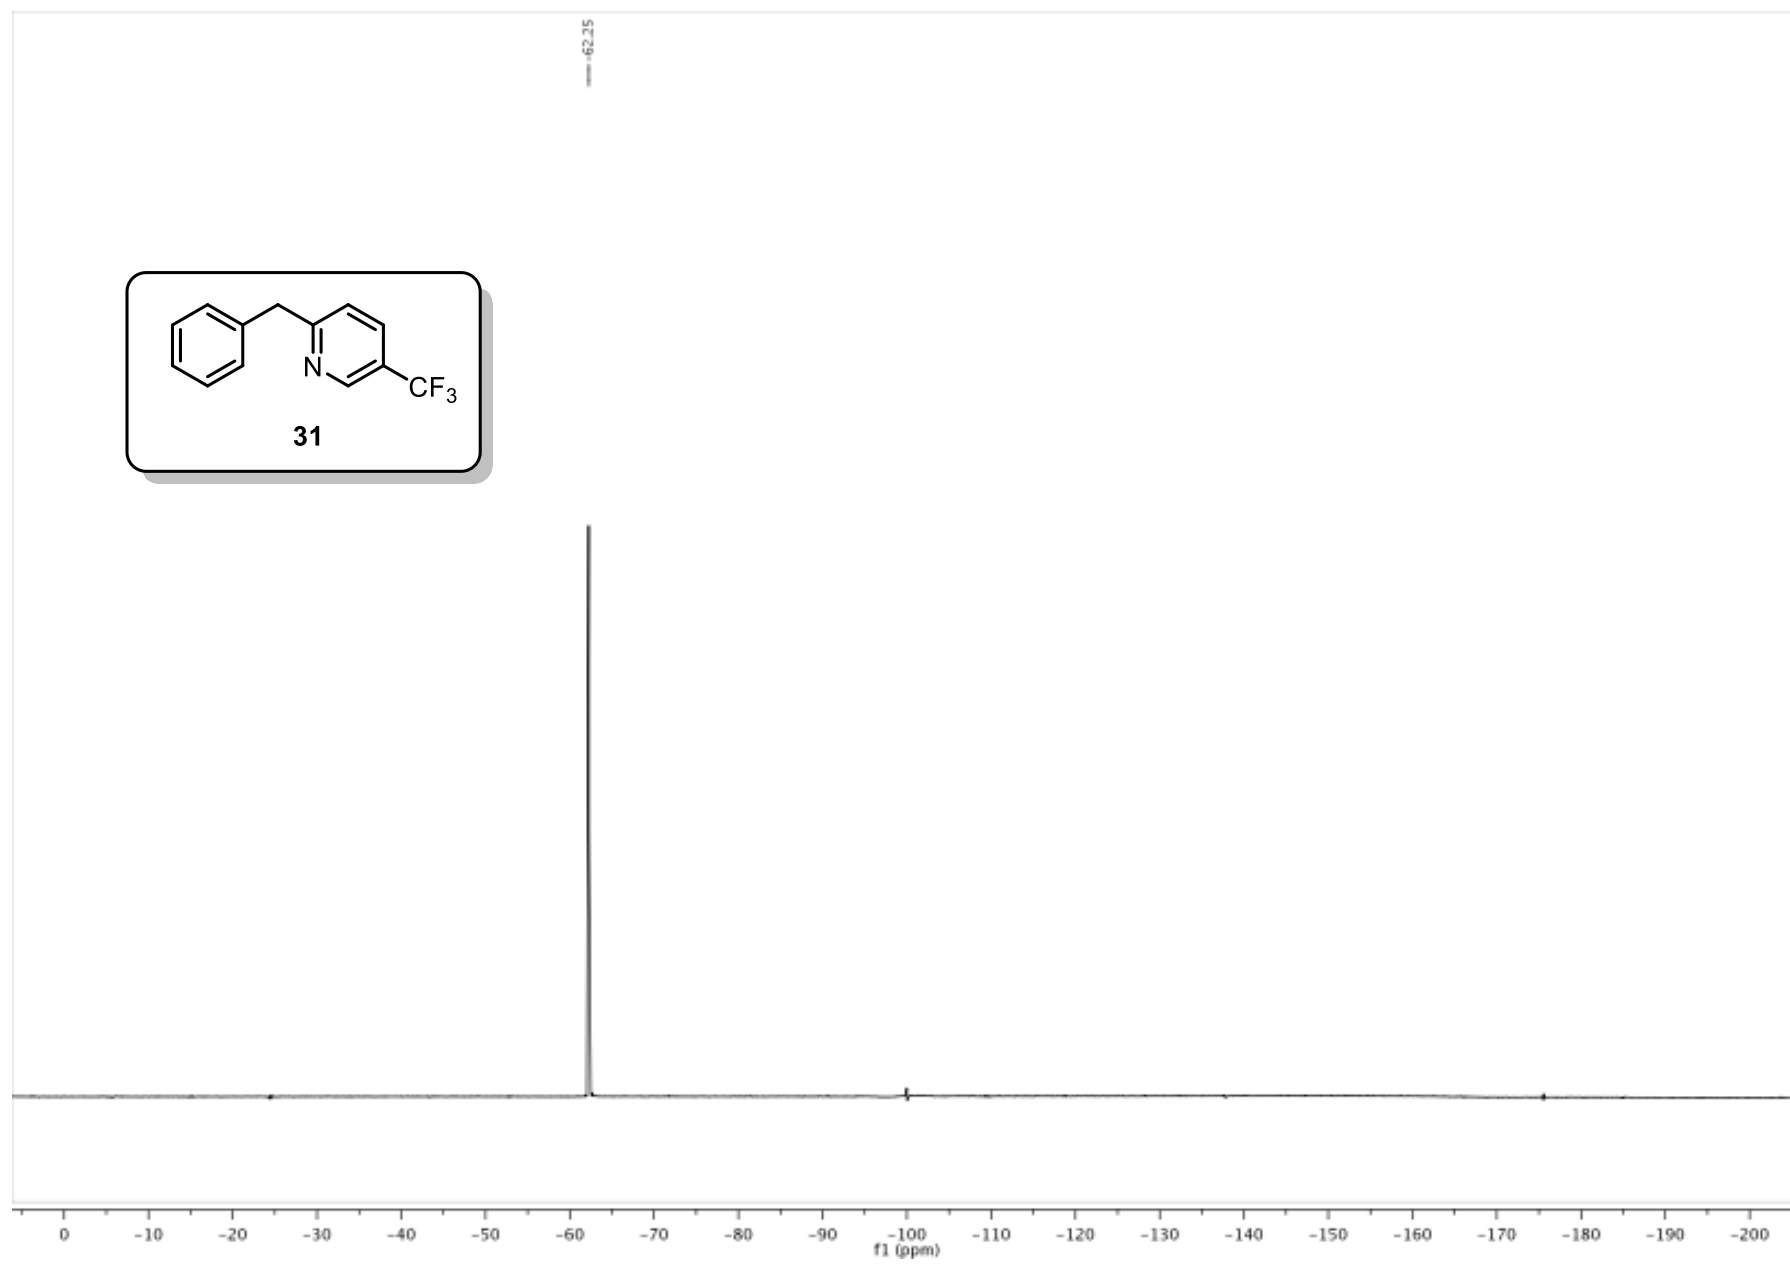

S68

$^1\text{H}$  NMR ( $\text{CDCl}_3$ , 500 MHz) spectrum of 5-(3-benzylphenyl)-1H-pyrazole (**32**)

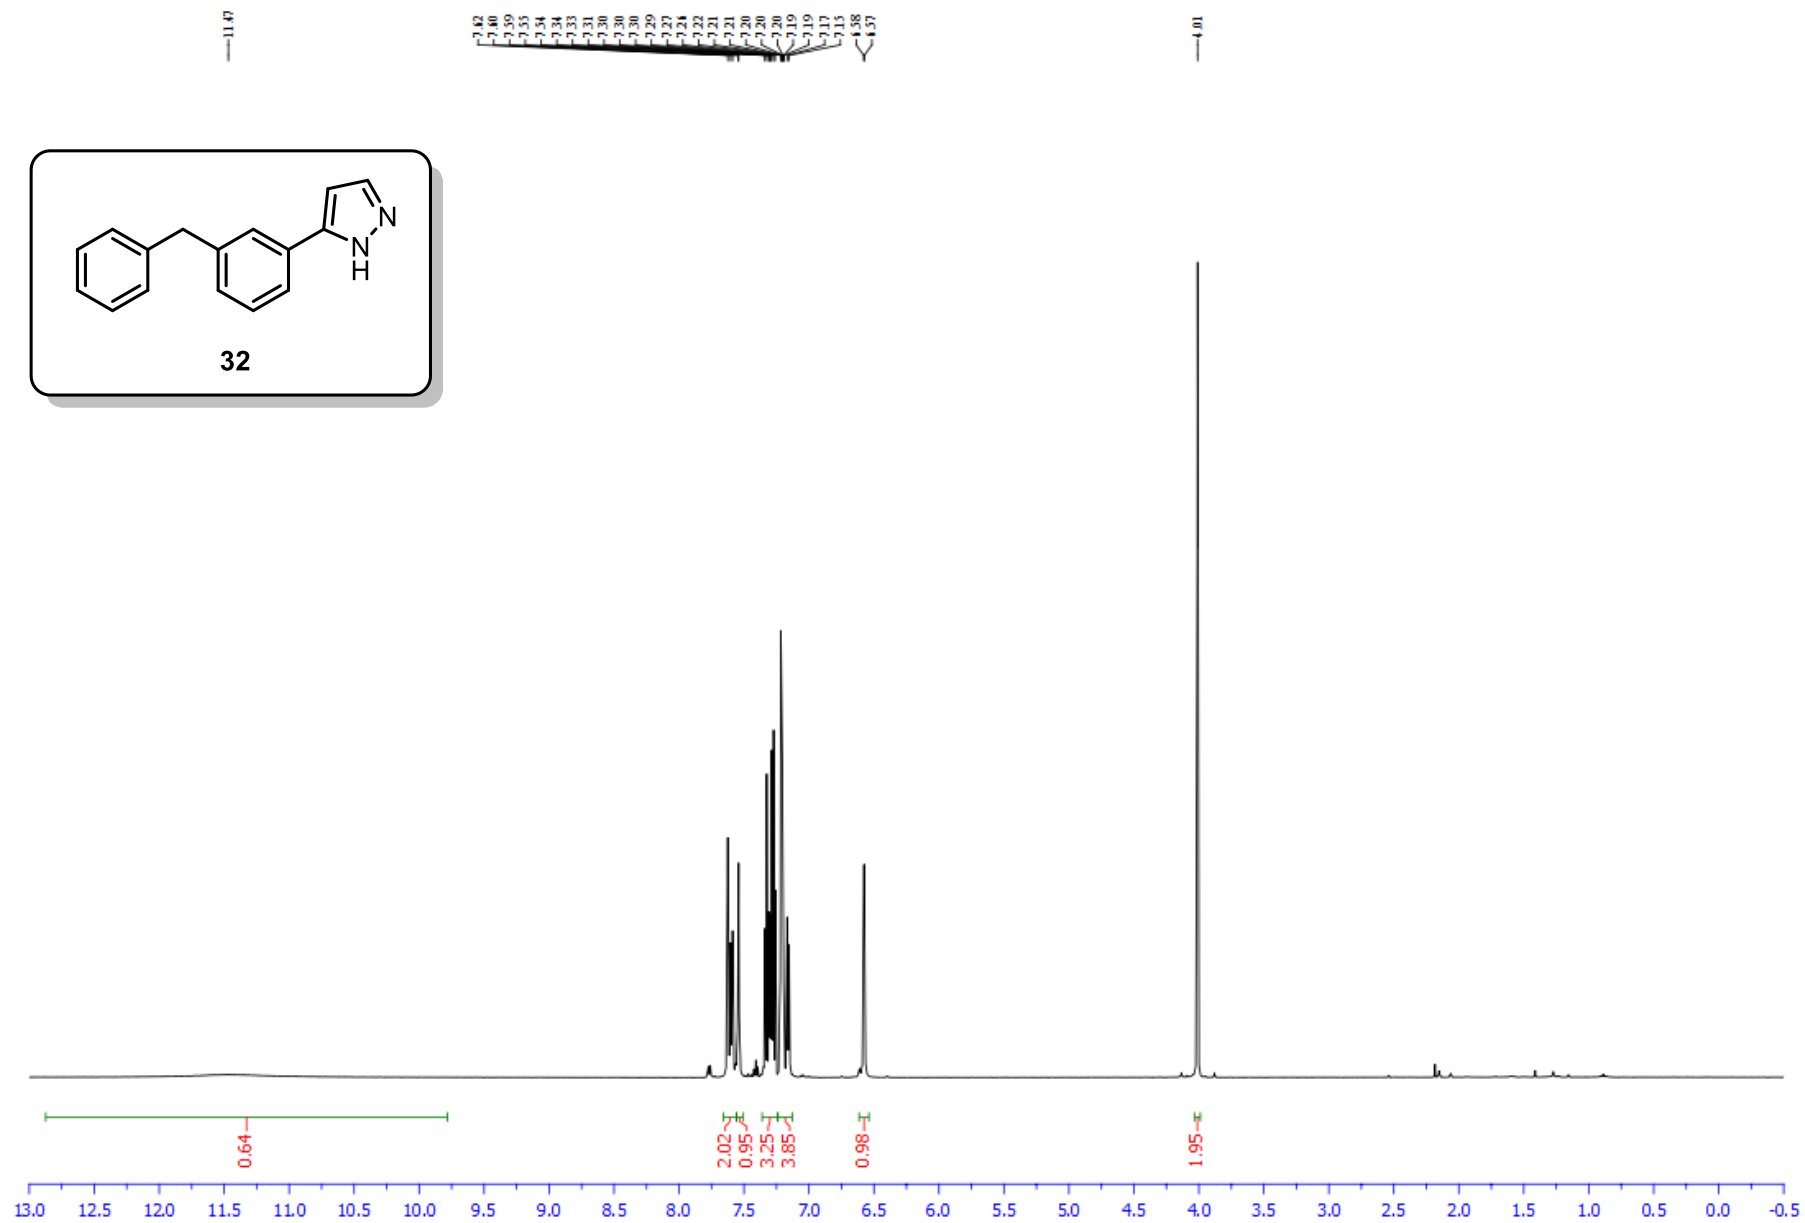

$^{13}\text{C}$  NMR ( $\text{CDCl}_3$ , 125.8 MHz) spectrum of 5-(3-benzylphenyl)-1H-pyrazole (**32**)

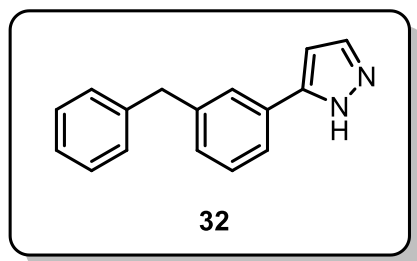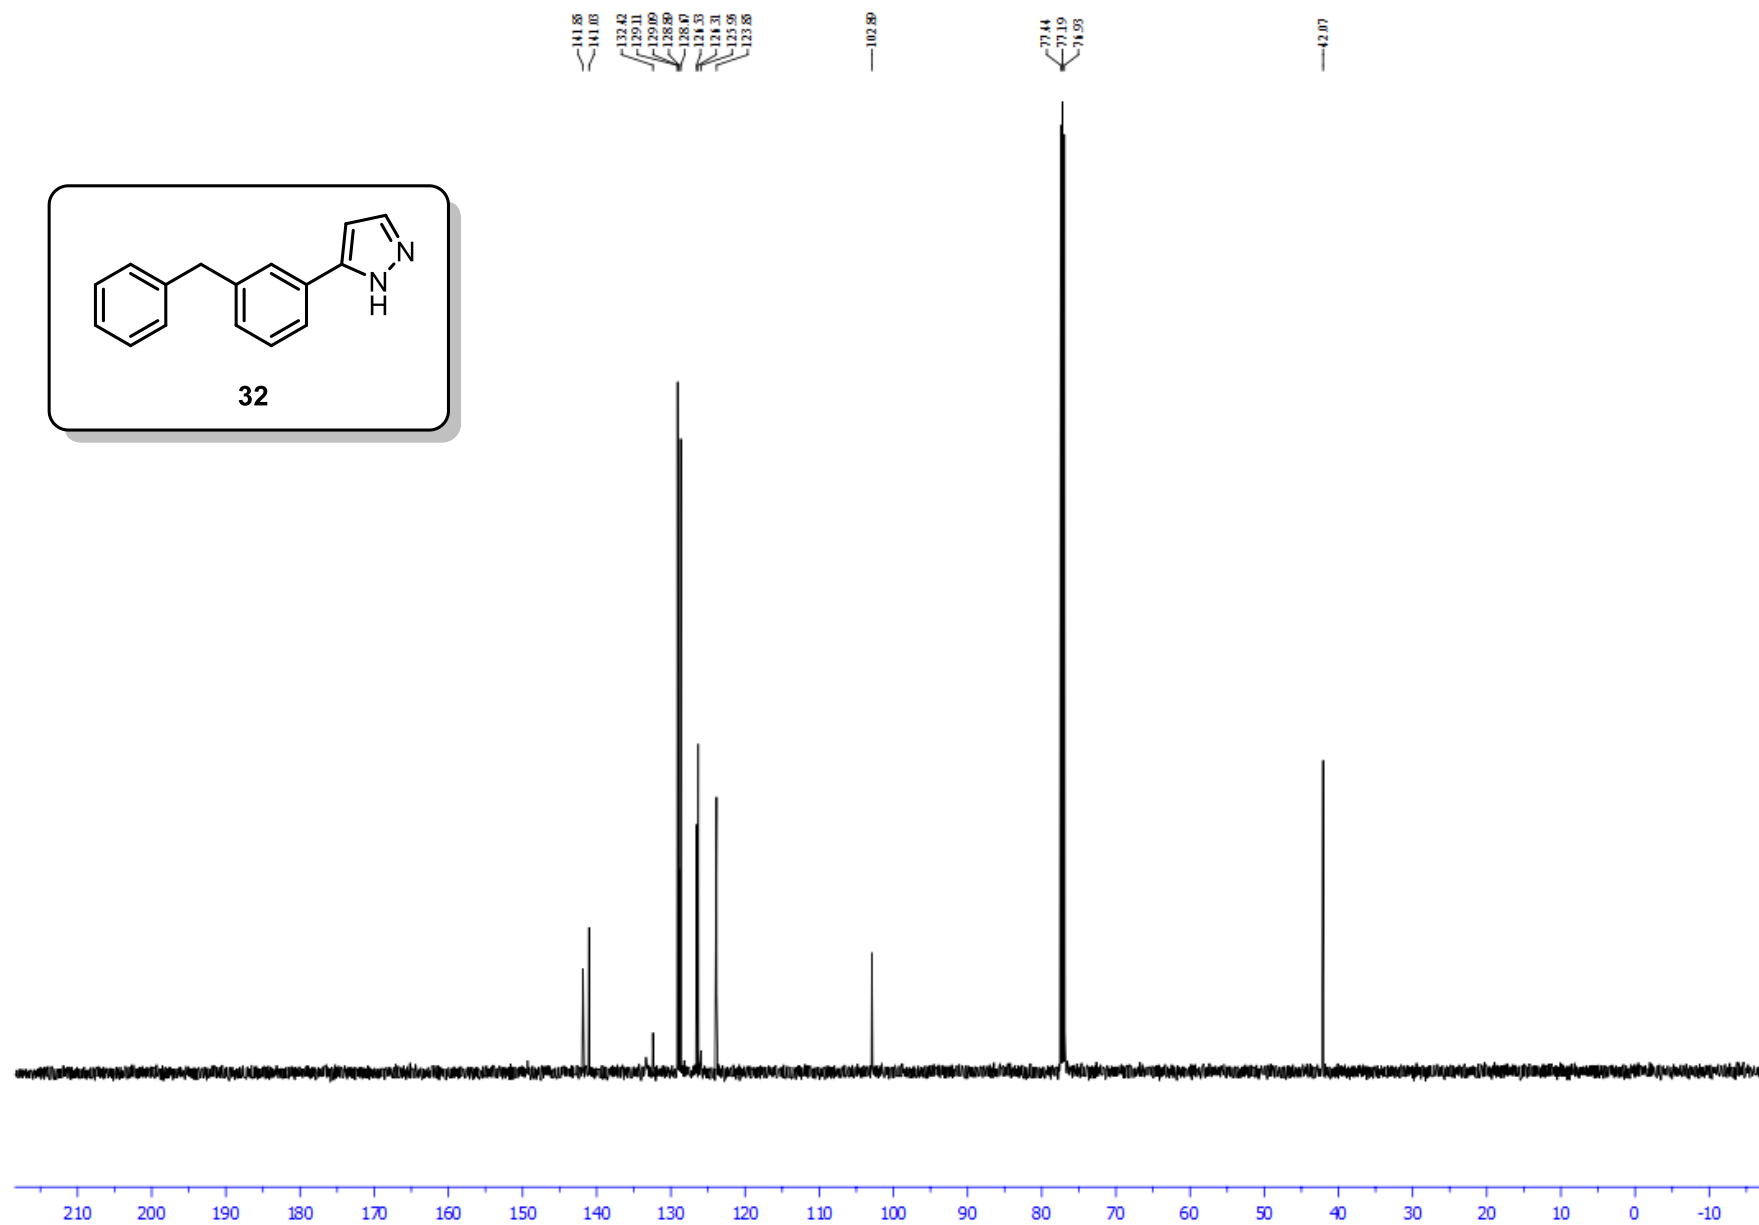

$^1\text{H}$  NMR ( $\text{CDCl}_3$ , 500 MHz) spectrum of 4-benzyl-2-methylpyridine (**33**)

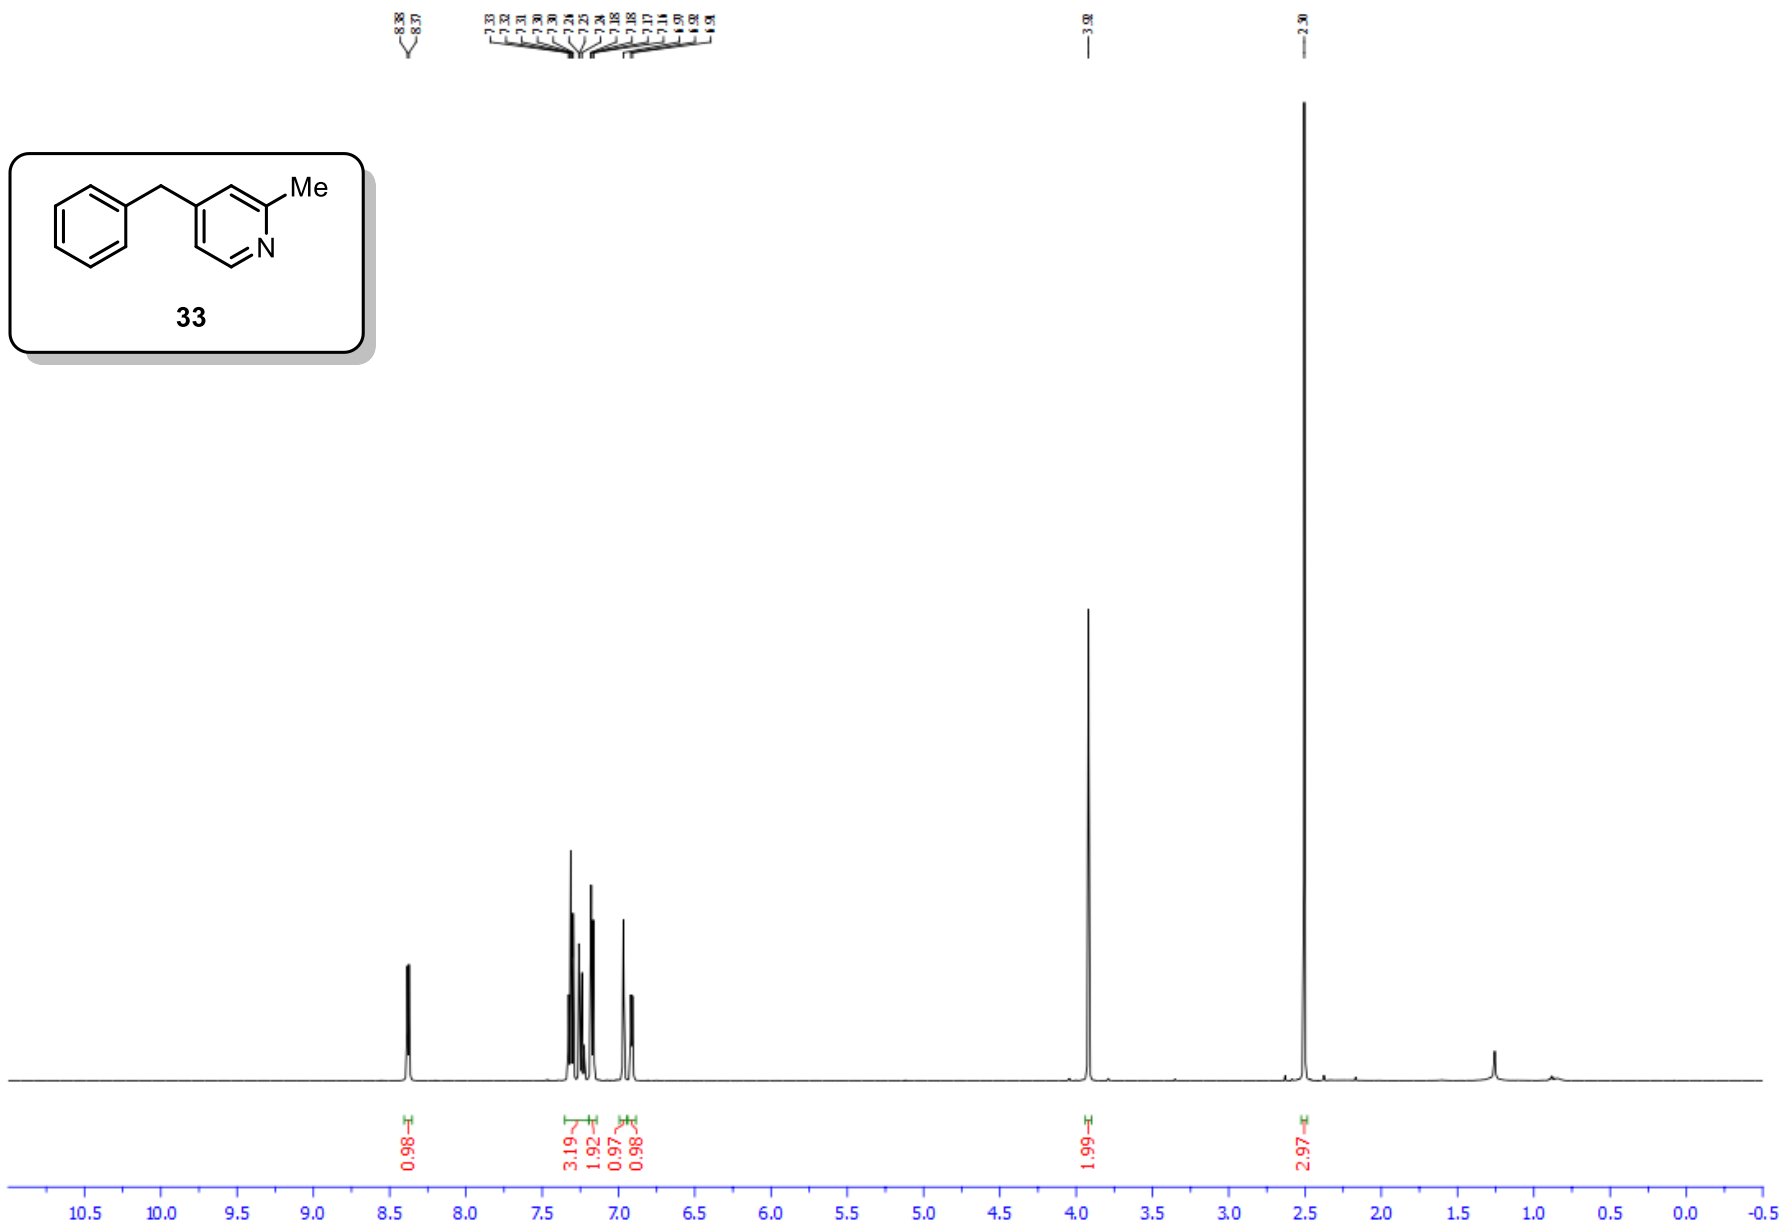



$^{13}\text{C}$  NMR ( $\text{CDCl}_3$ , 125.8 MHz) spectrum of 4-benzyl-2-methylpyridine (**33**)

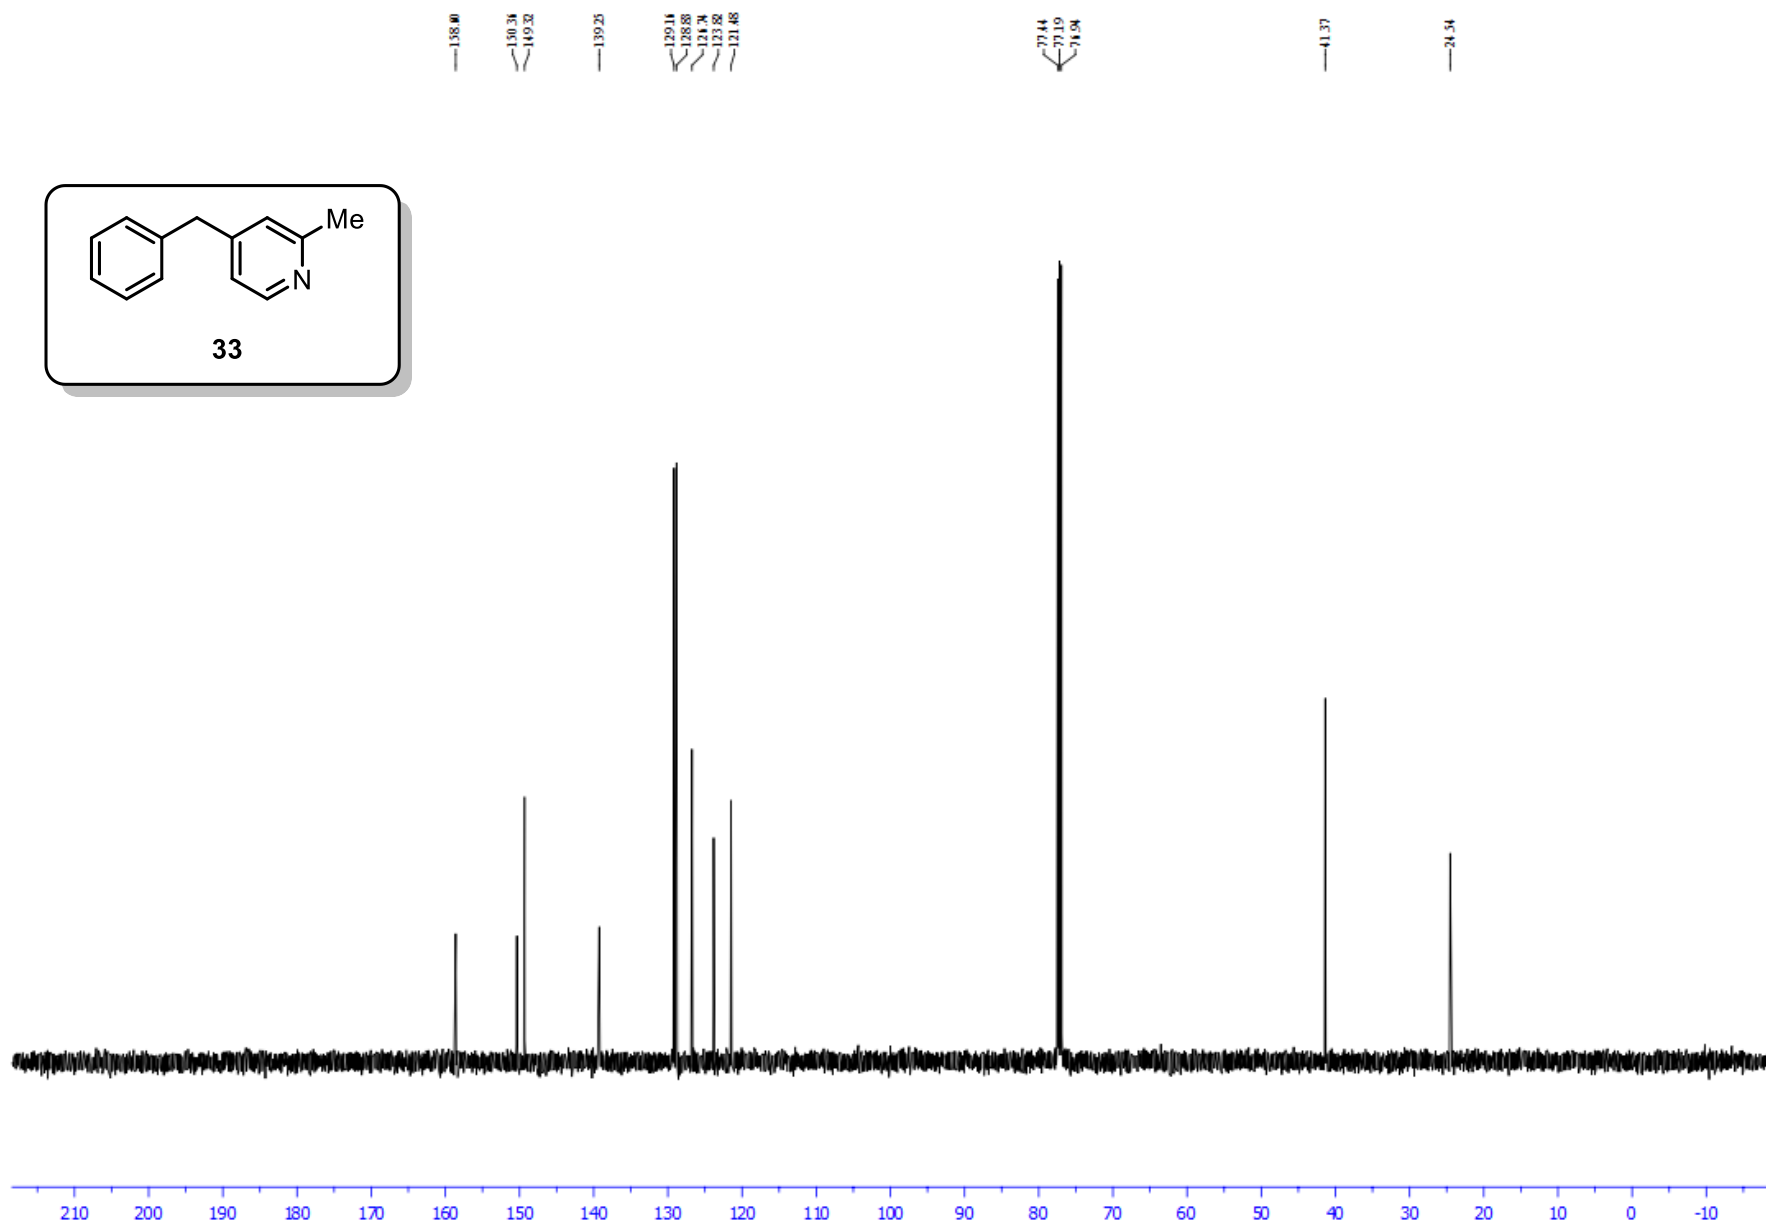

$^1\text{H}$  NMR ( $\text{CDCl}_3$ , 500 MHz) spectrum of 5-benzylpyrimidine (**34**)

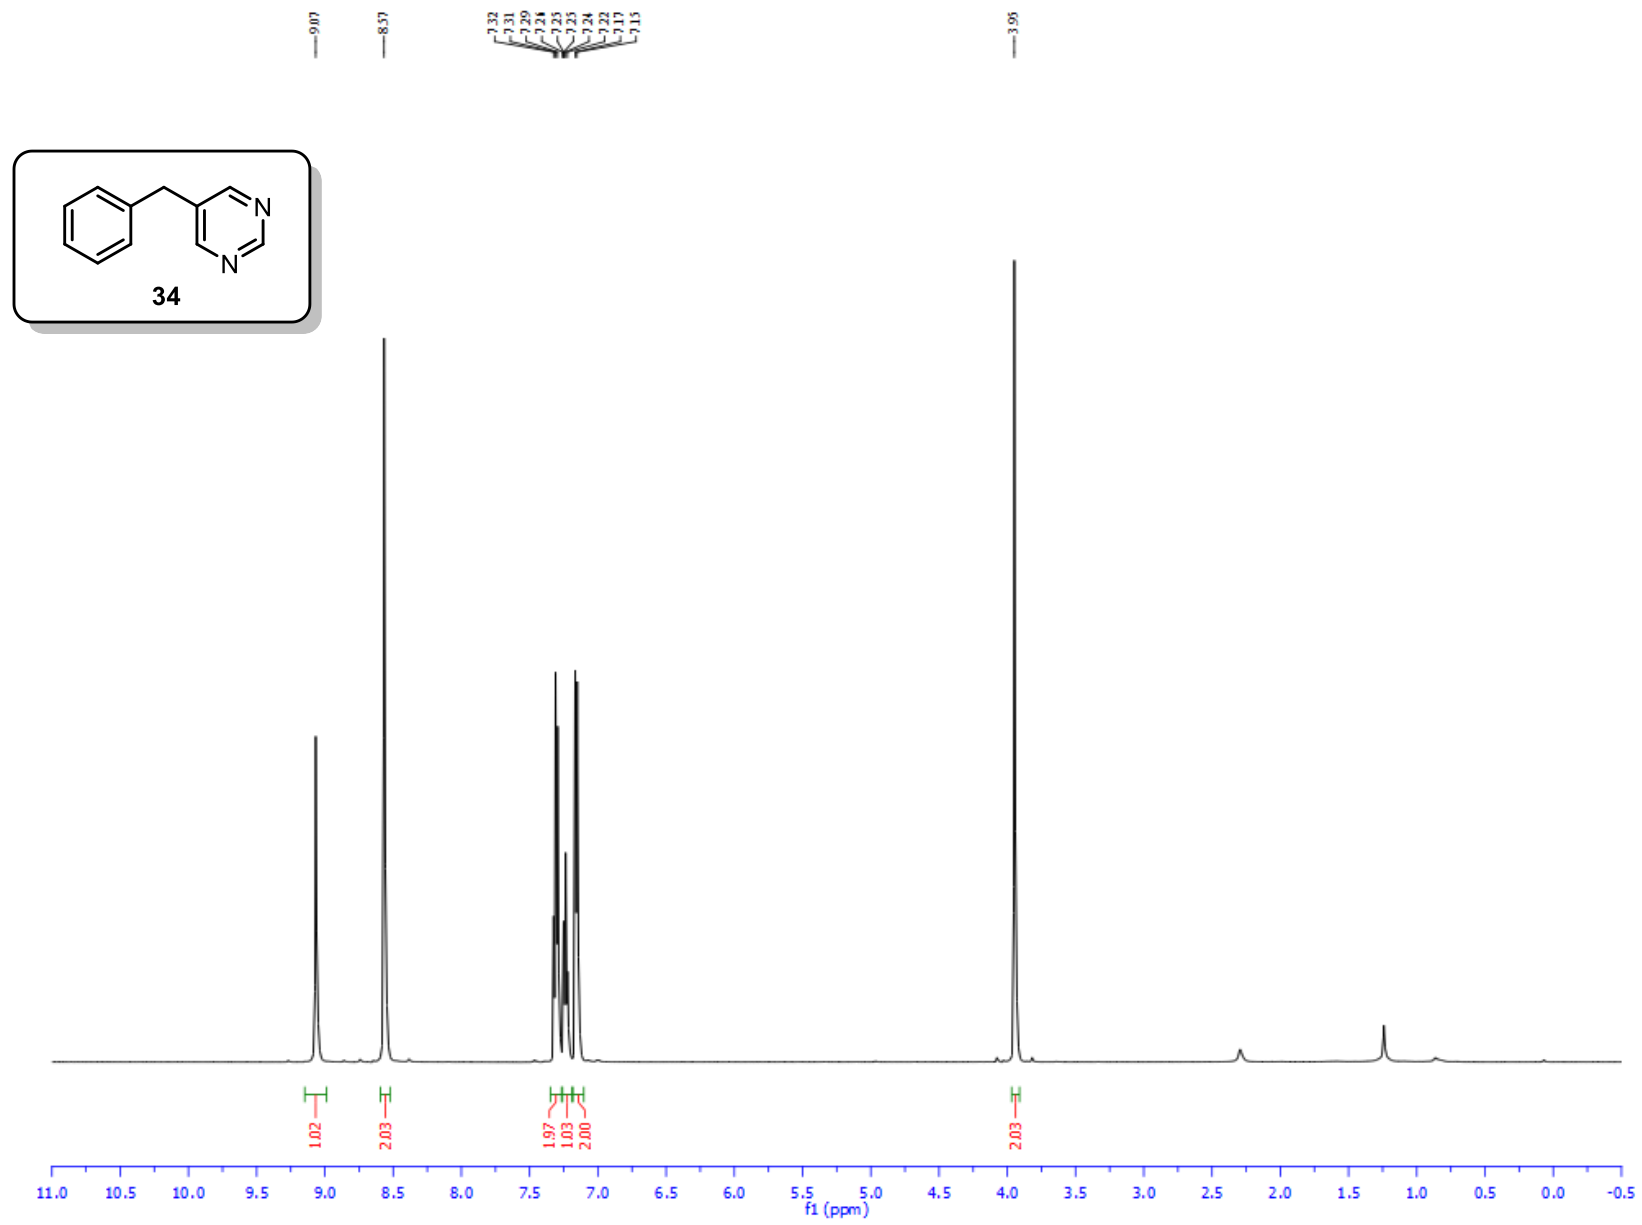

$^{13}\text{C}$  NMR ( $\text{CDCl}_3$ , 125.8 MHz) spectrum of 5-benzylpyrimidine (**34**)

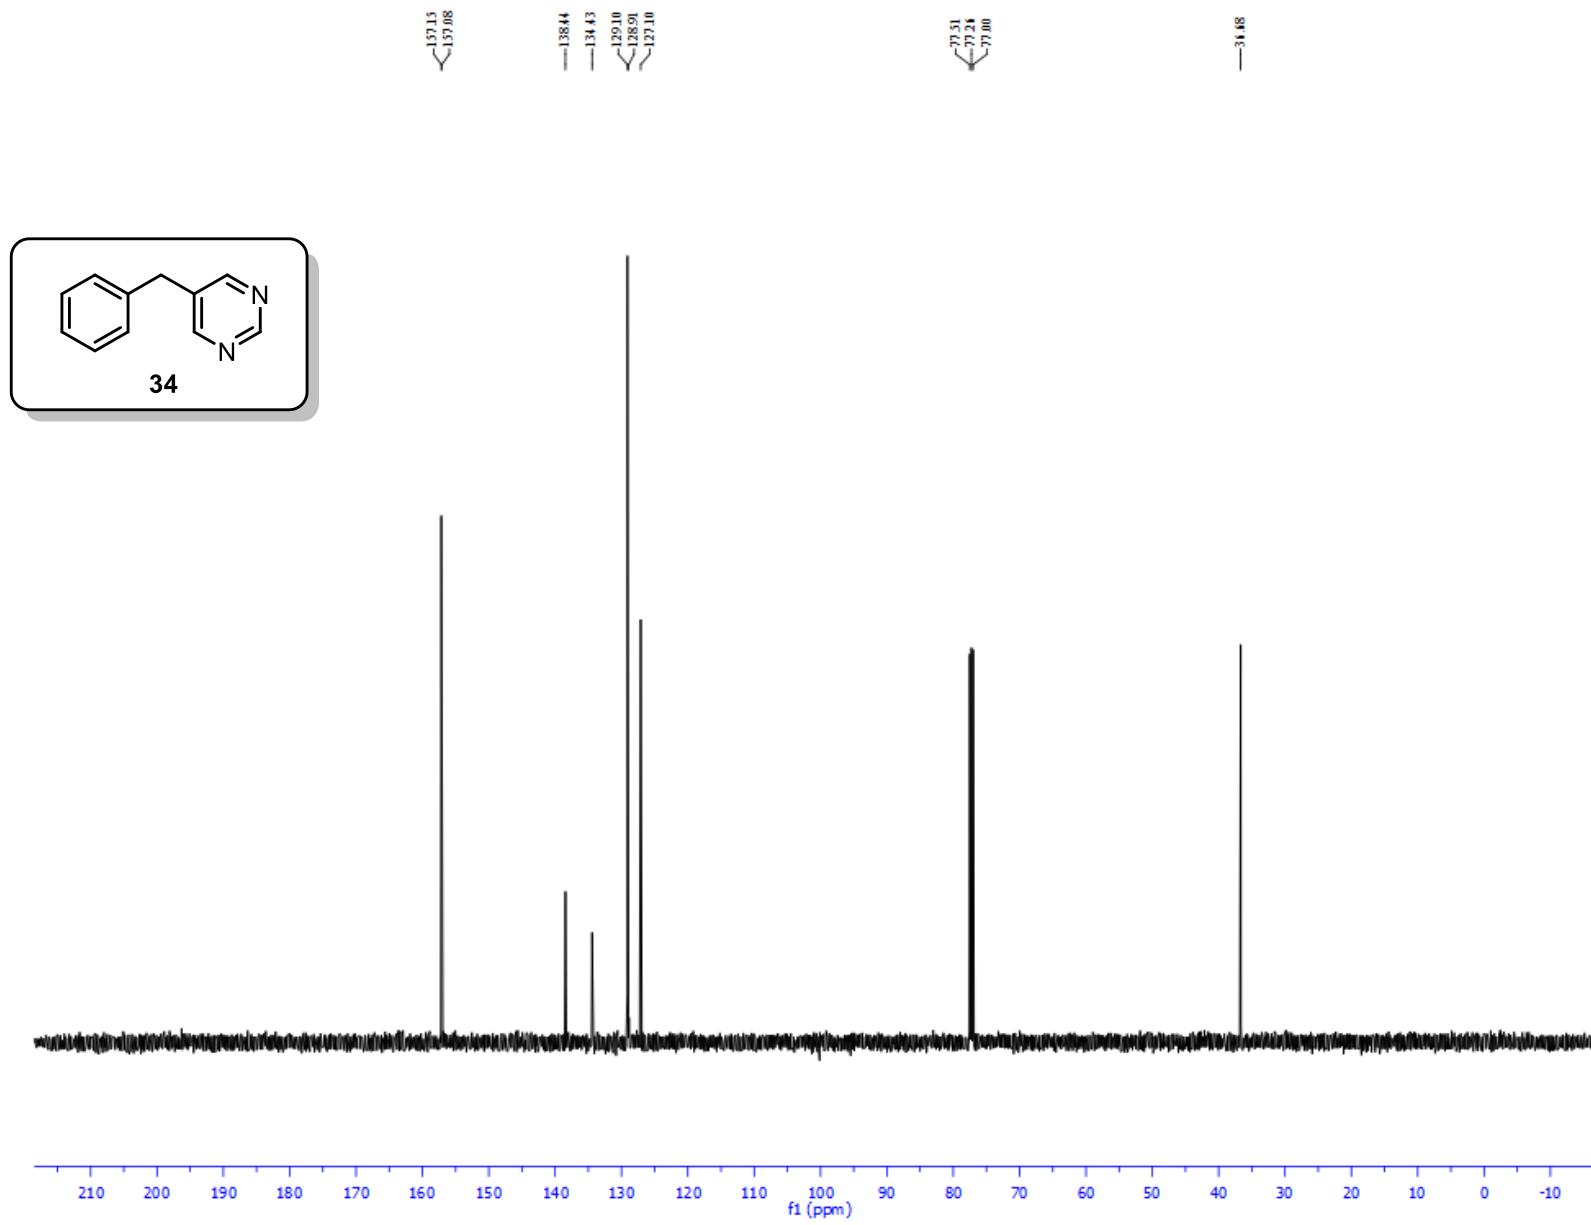

$^1\text{H}$  NMR ( $\text{CDCl}_3$ , 500 MHz) spectrum of 5-benzyl-1H-indole (**35**)

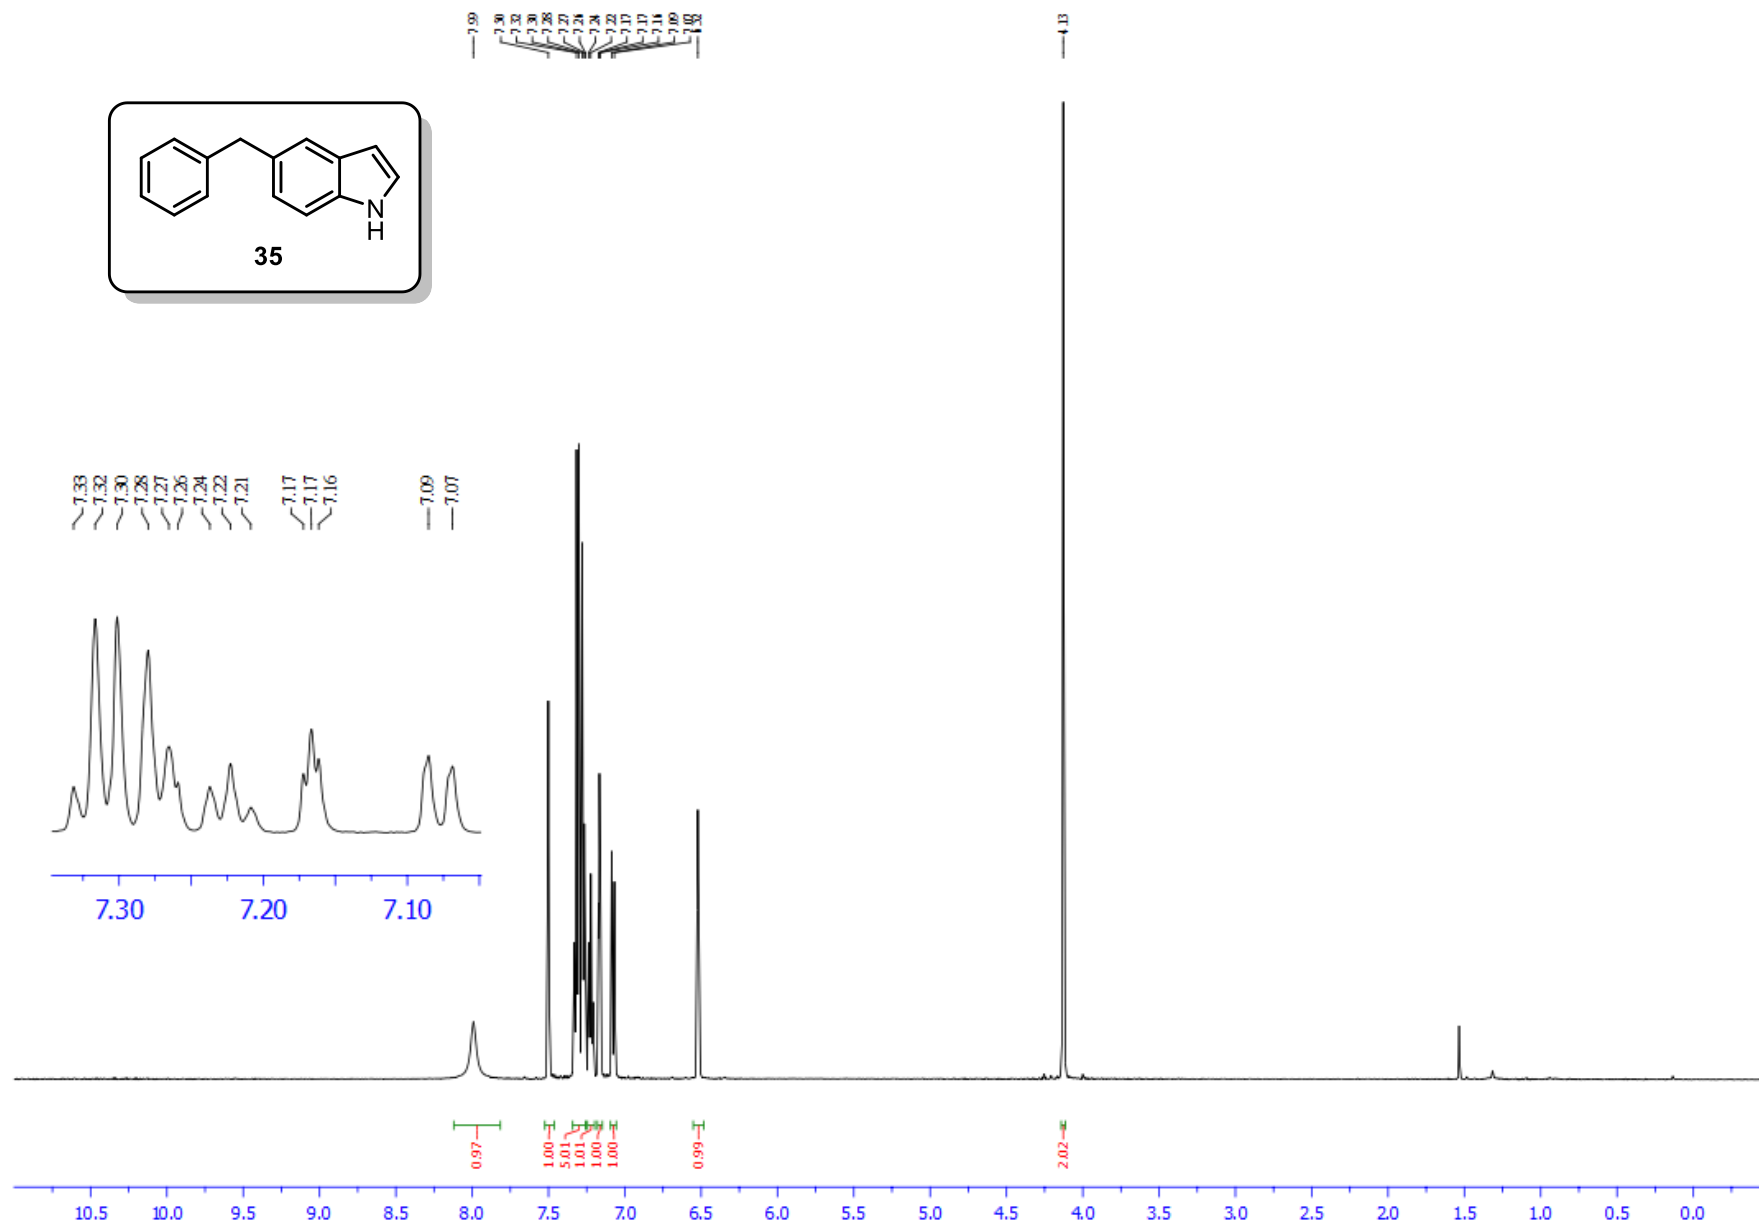

$^{13}\text{C}$  NMR ( $\text{CDCl}_3$ , 125.8 MHz) spectrum of 5-benzyl-1H-indole (**35**)

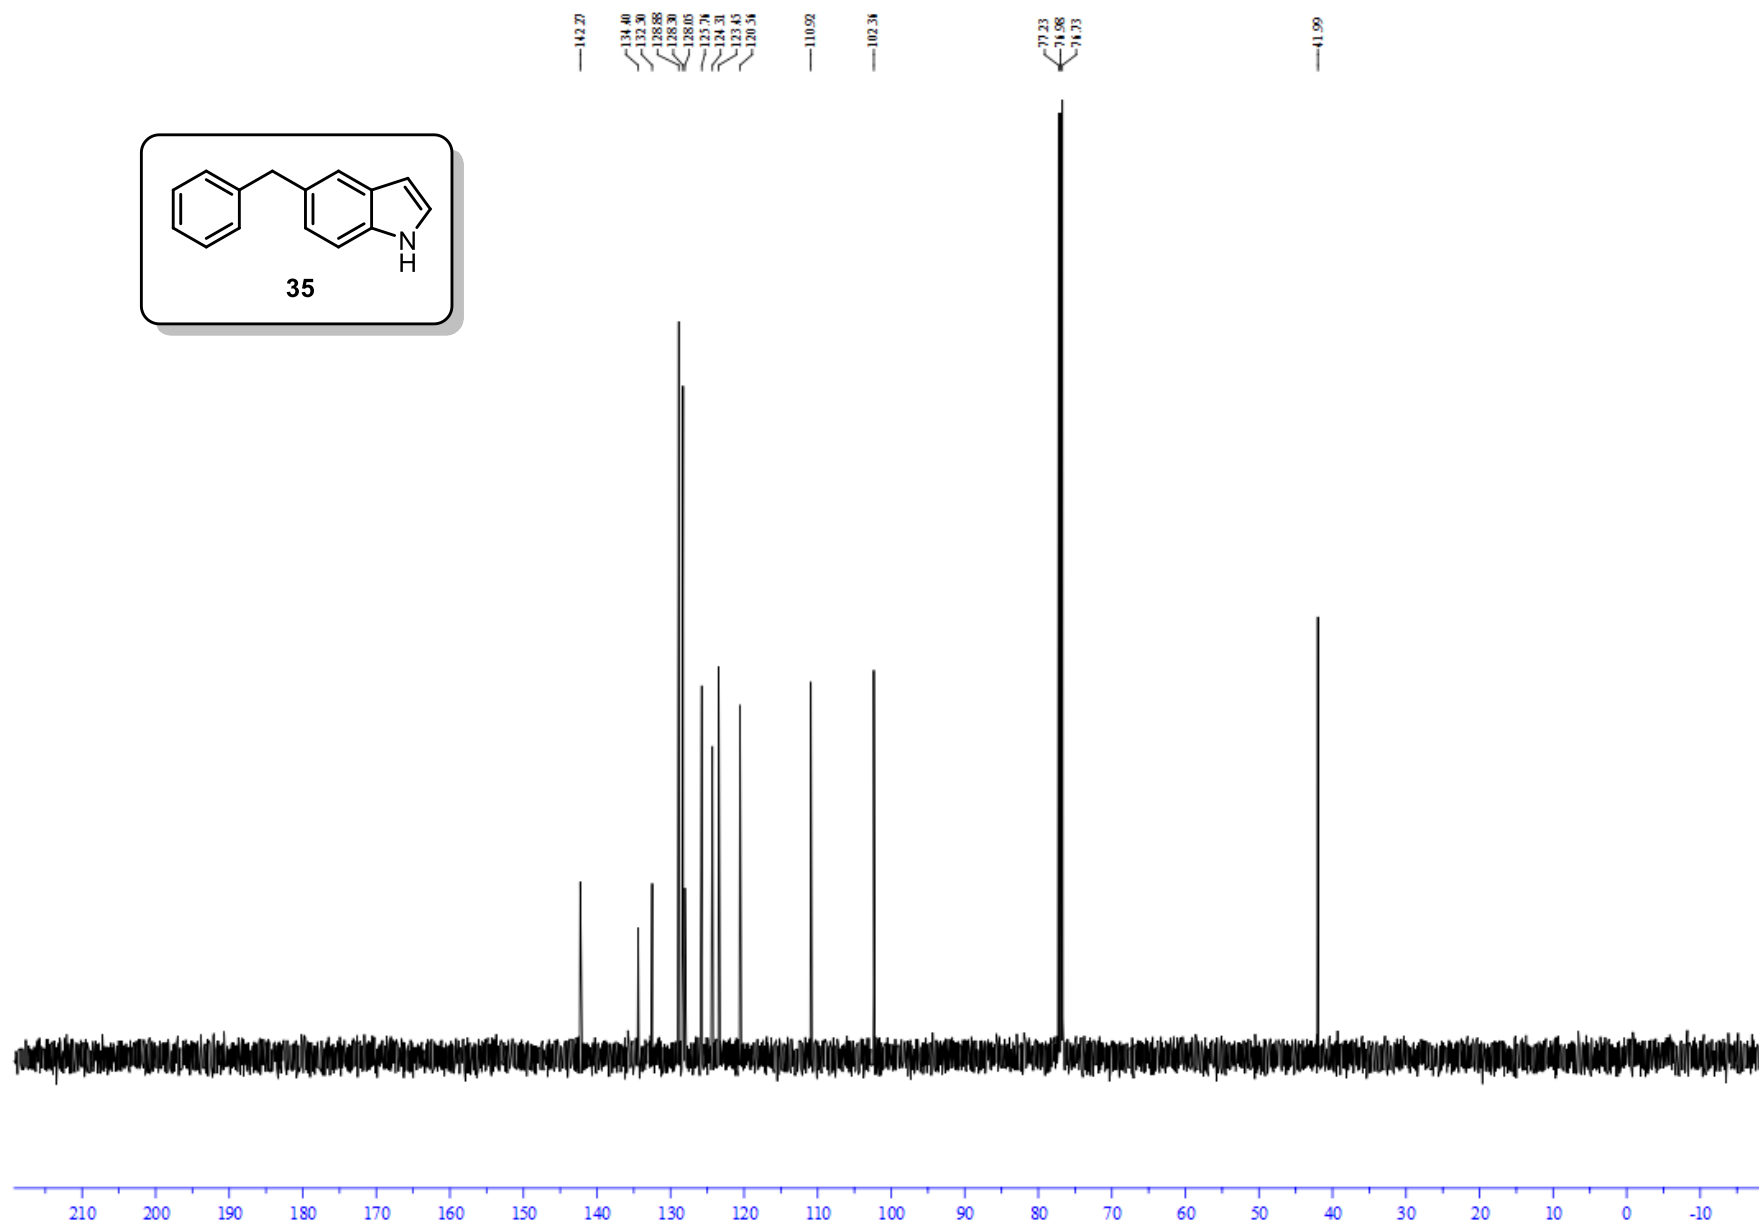

$^1\text{H}$  NMR ( $\text{CDCl}_3$ , 500 MHz) spectrum of 2-(4-benzylphenyl)-1,3,4-oxadiazole (**36**)

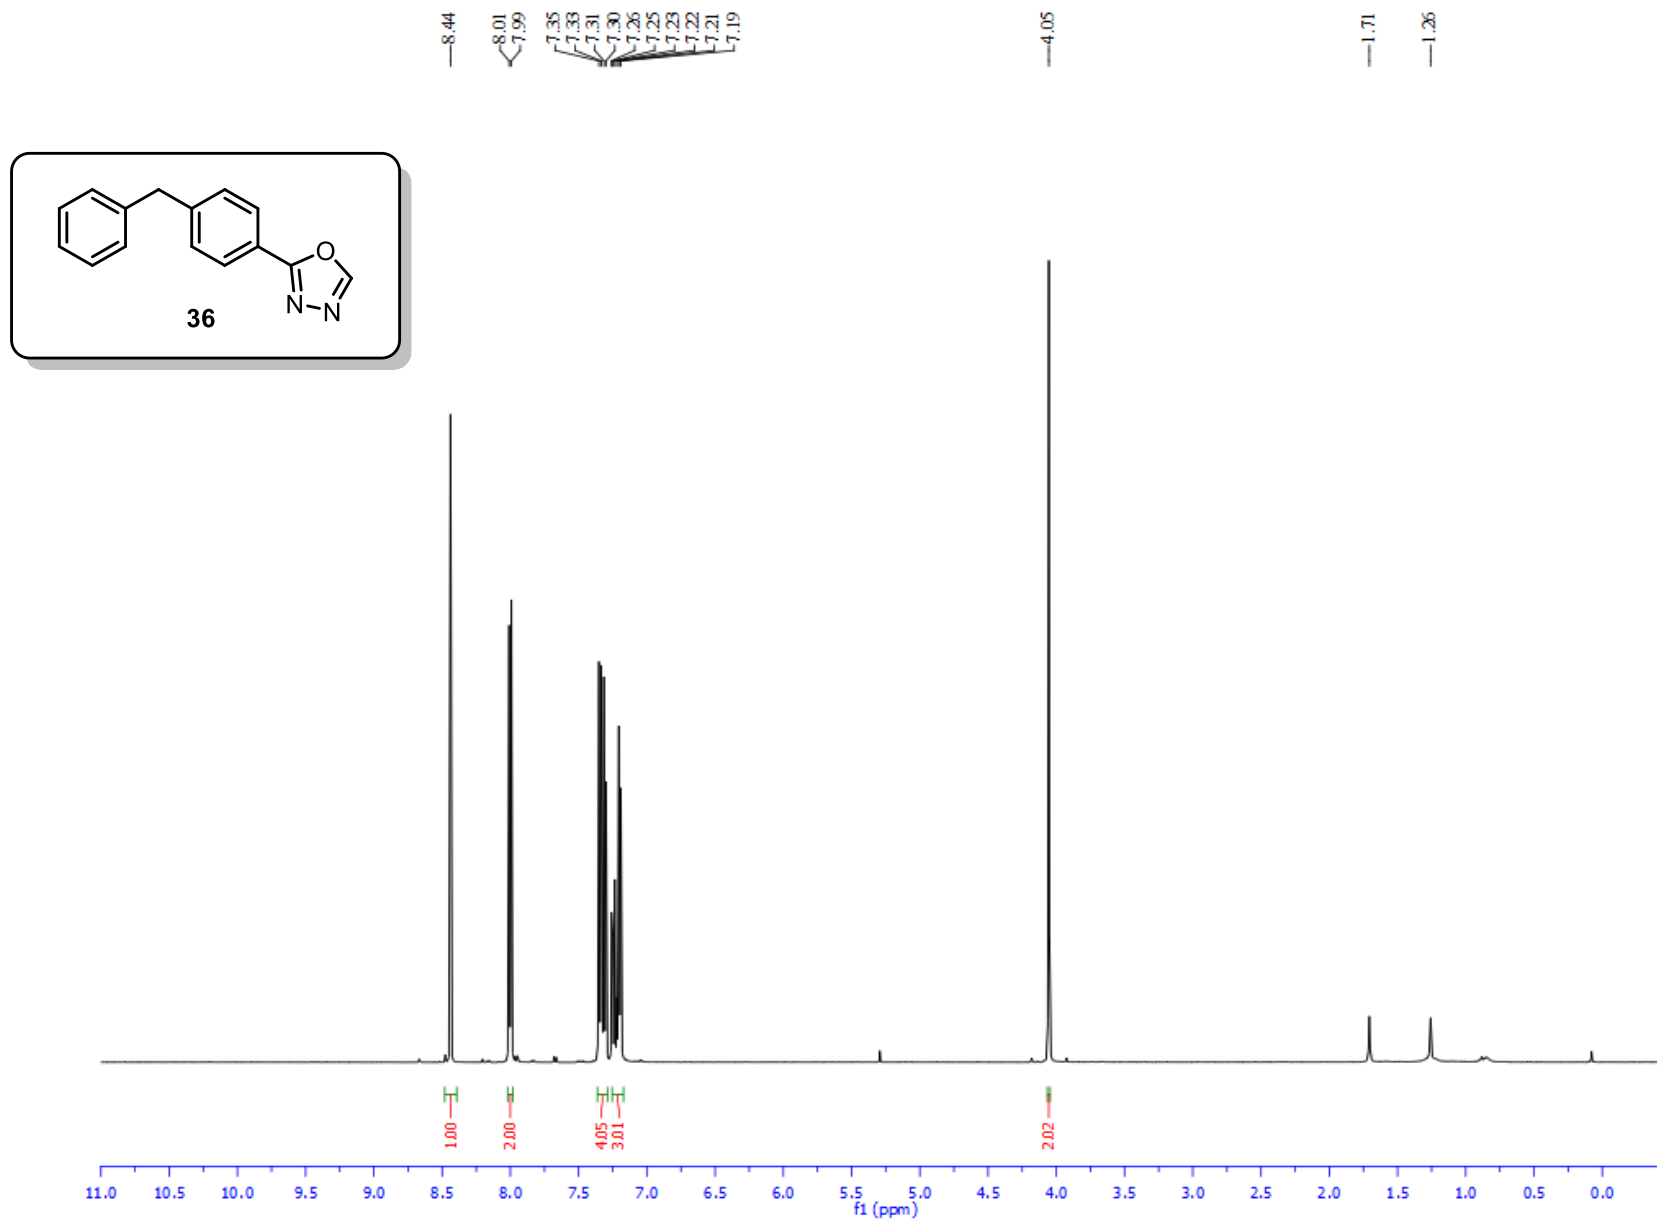

S77

$^{13}\text{C}$  NMR ( $\text{CDCl}_3$ , 125.8 MHz) spectrum of 2-(4-benzylphenyl)-1,3,4-oxadiazole (**36**)

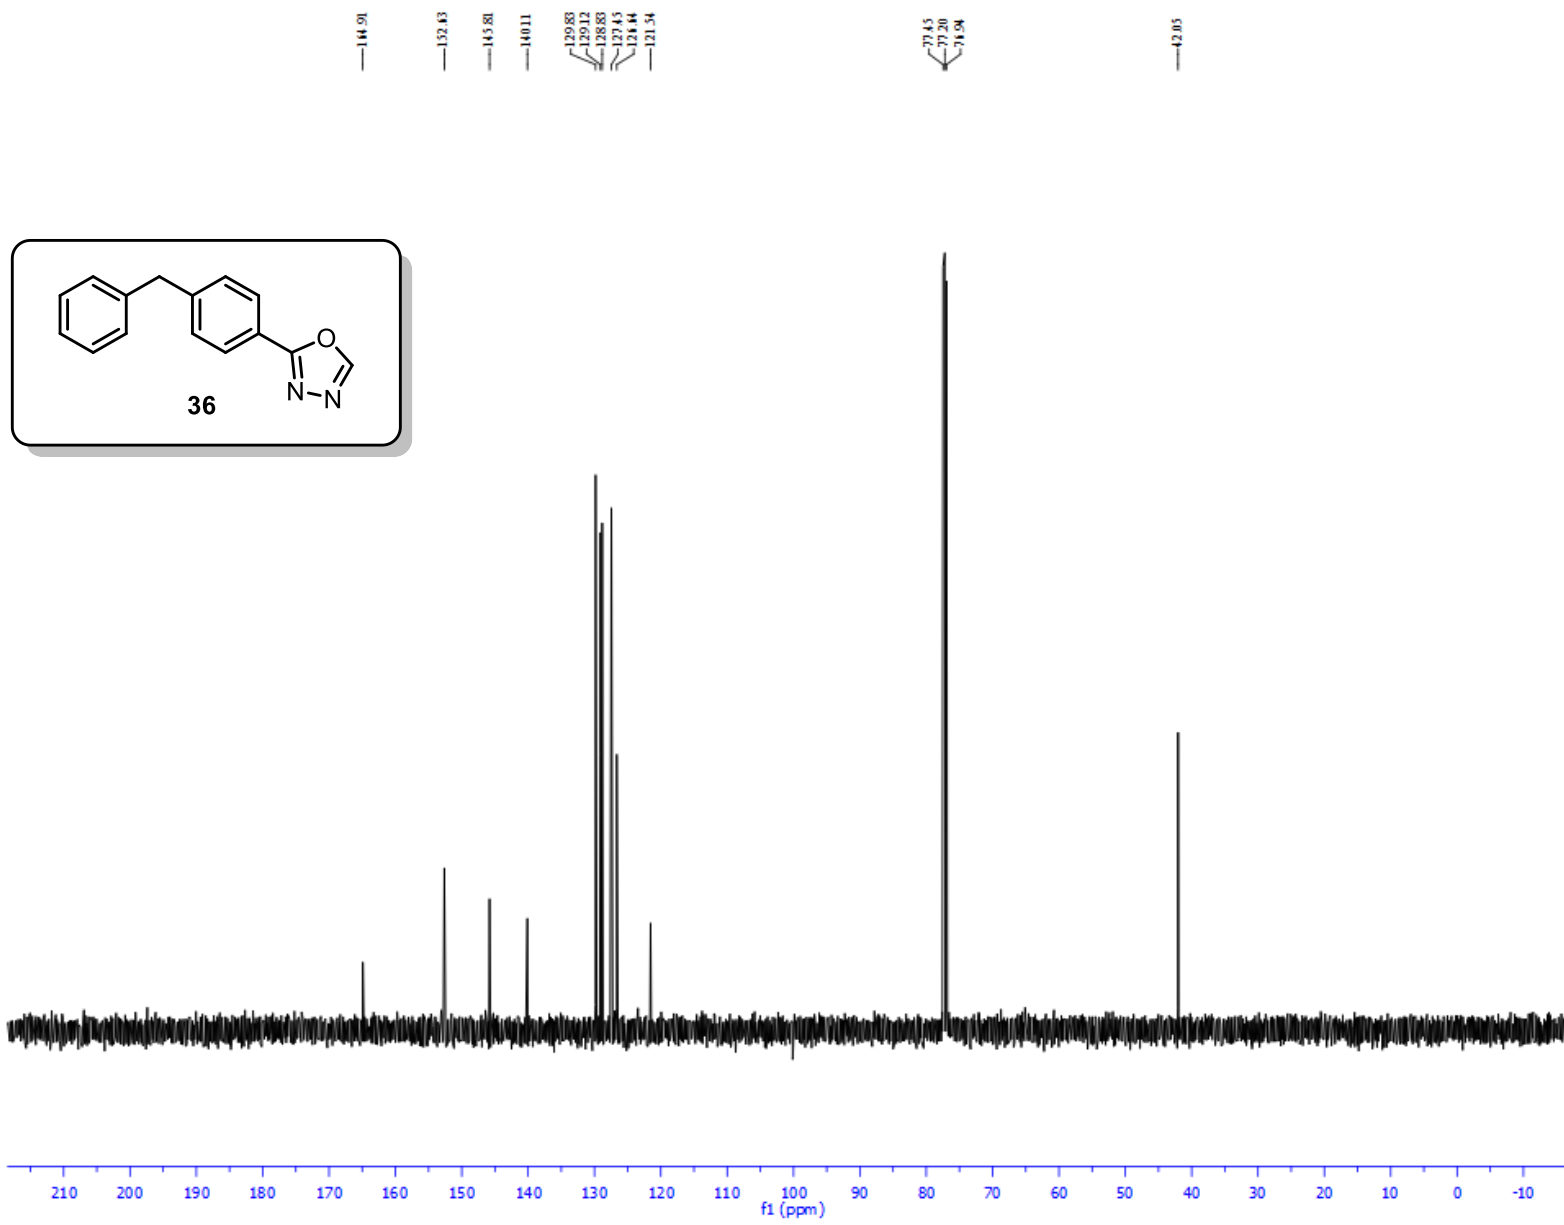

$^1\text{H}$  NMR ( $\text{CDCl}_3$ , 500 MHz) spectrum of 5-benzylquinoline (**37**)

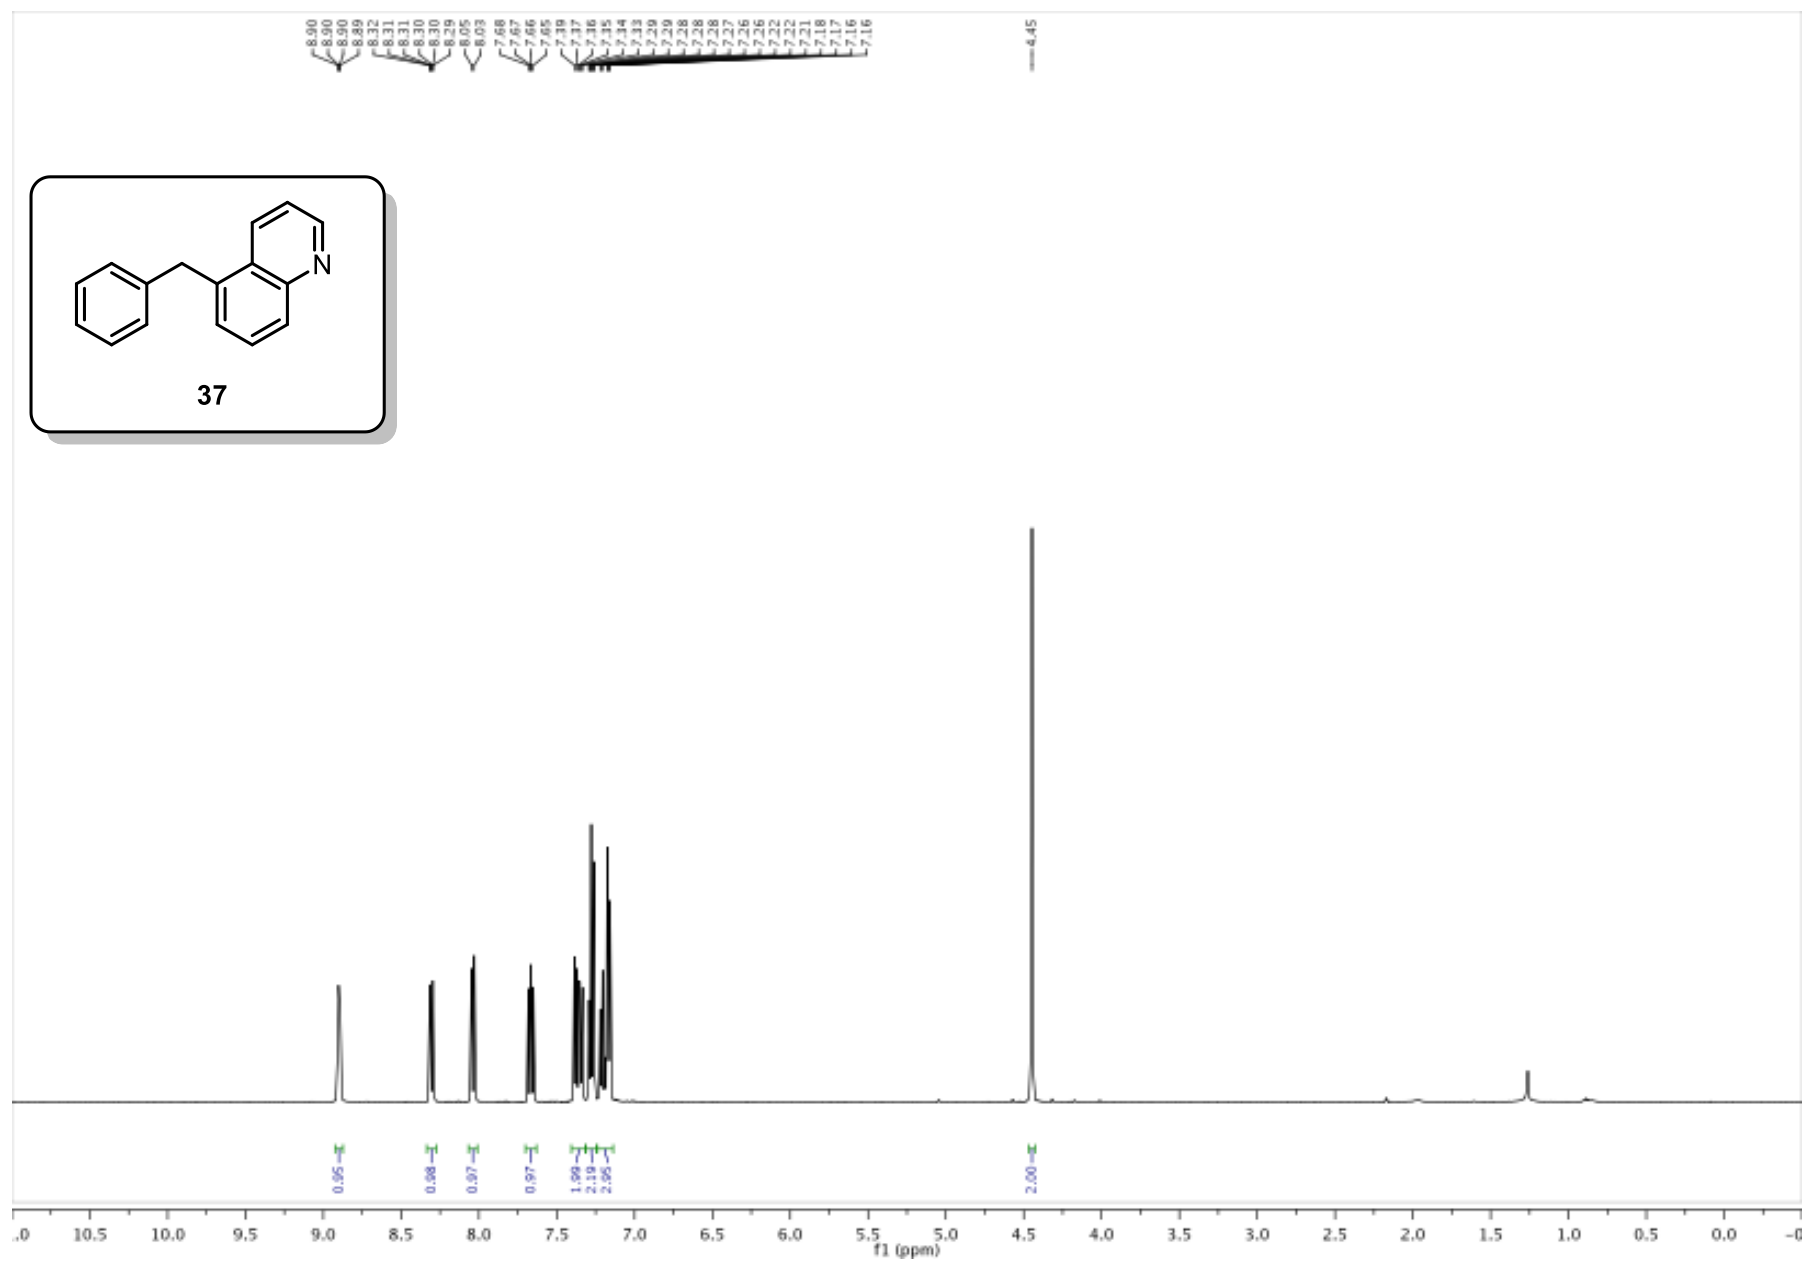



$^{13}\text{C}$  NMR ( $\text{CDCl}_3$ , 125.8 MHz) spectrum of 5-benzylquinoline (**37**)

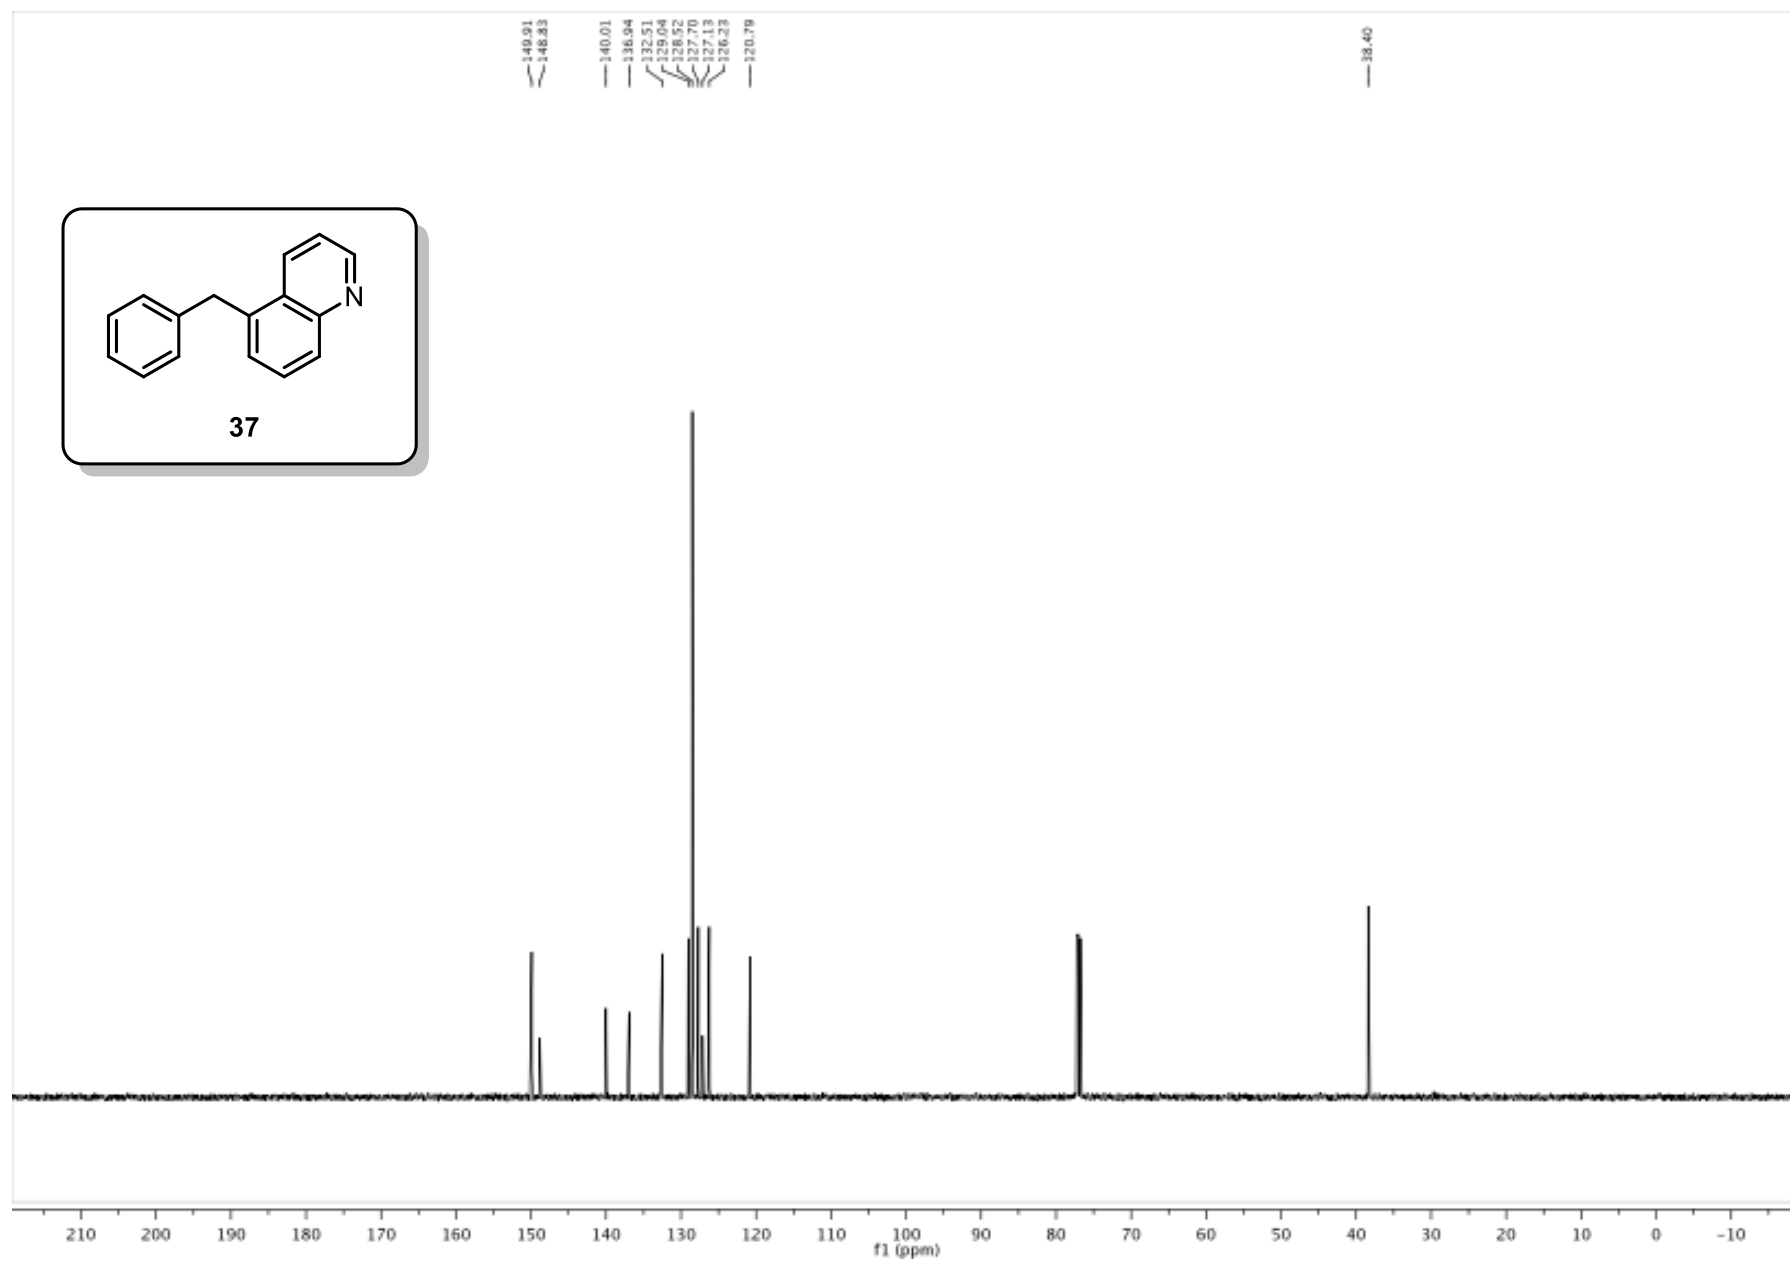

S80

$^1\text{H}$  NMR ( $\text{CDCl}_3$ , 500 MHz) spectrum of 5-benzylthiophene-2-carbaldehyde (**38**)

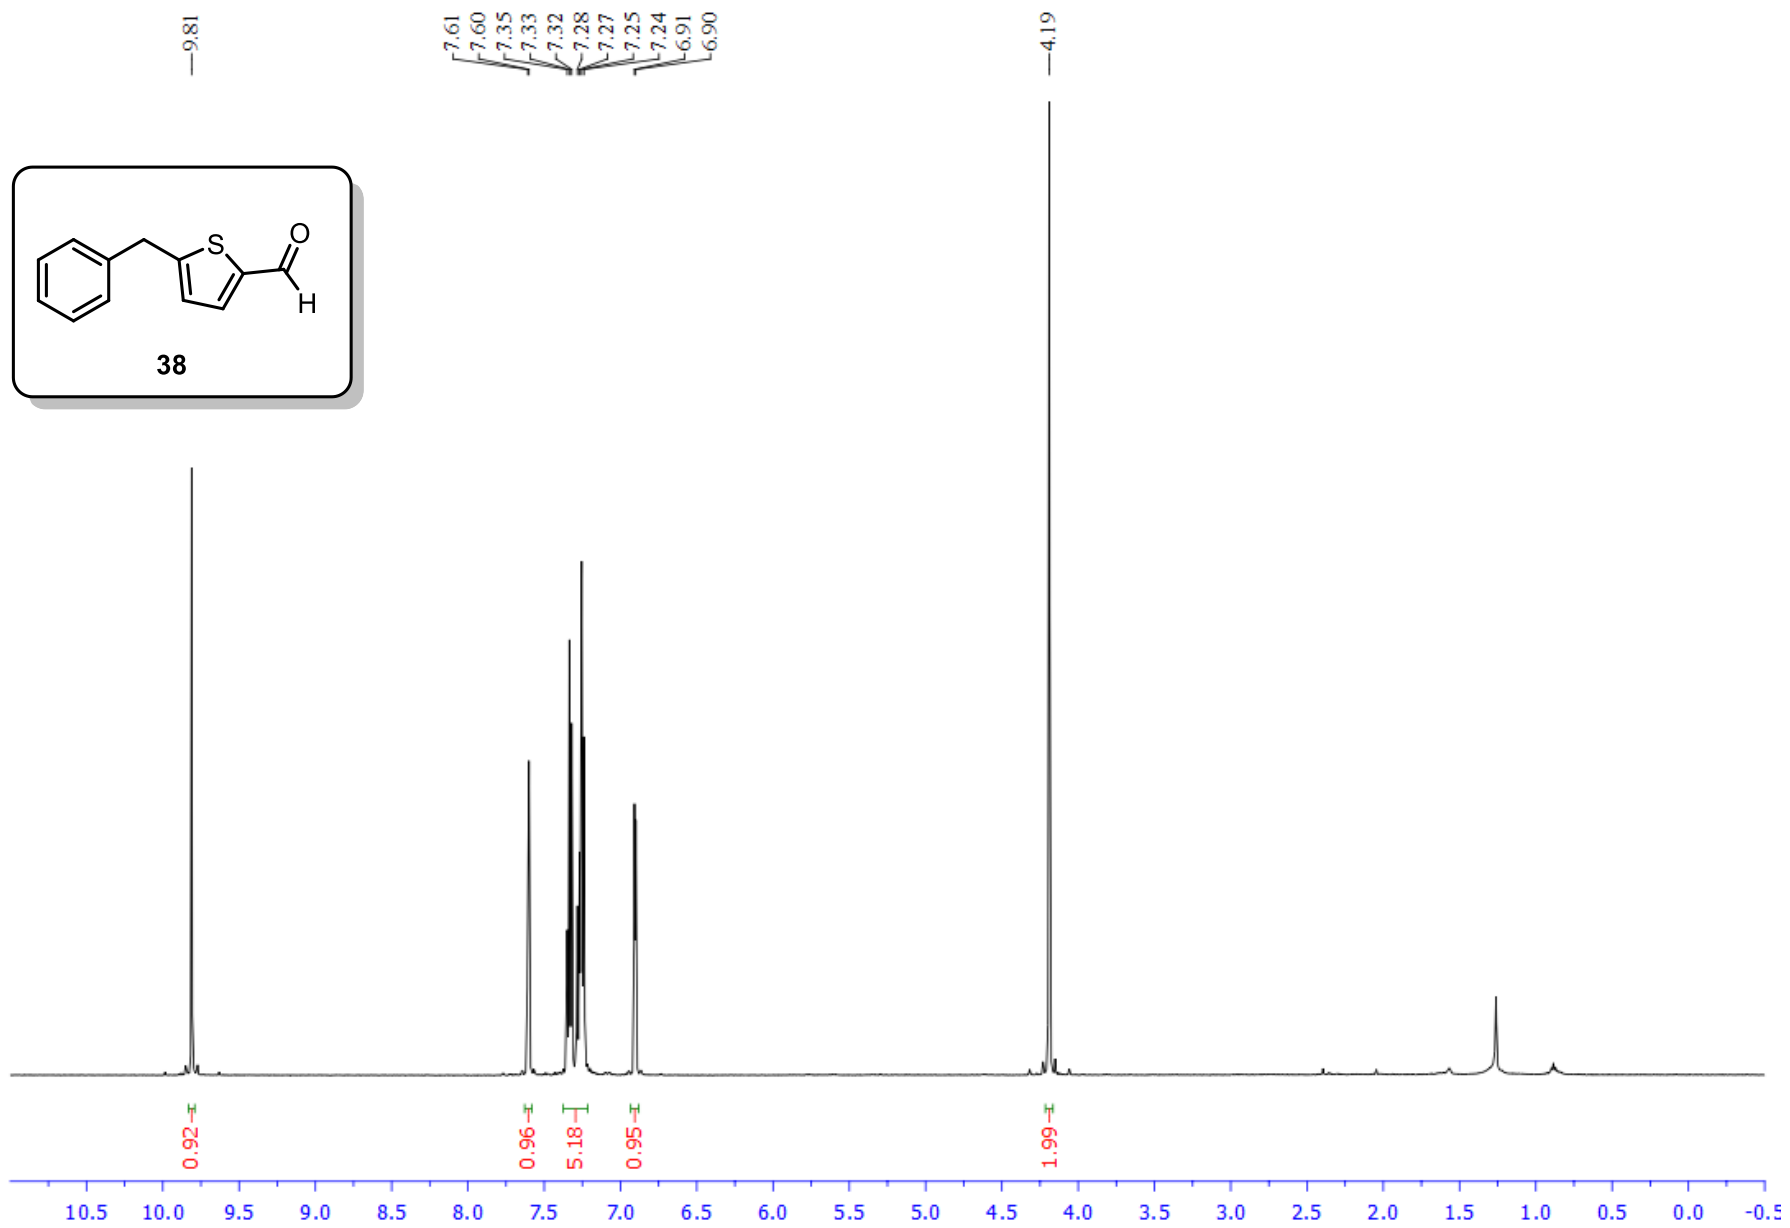

S81

$^{13}\text{C}$  NMR ( $\text{CDCl}_3$ , 125.8 MHz) spectrum of 5-benzylthiophene-2-carbaldehyde (**38**)

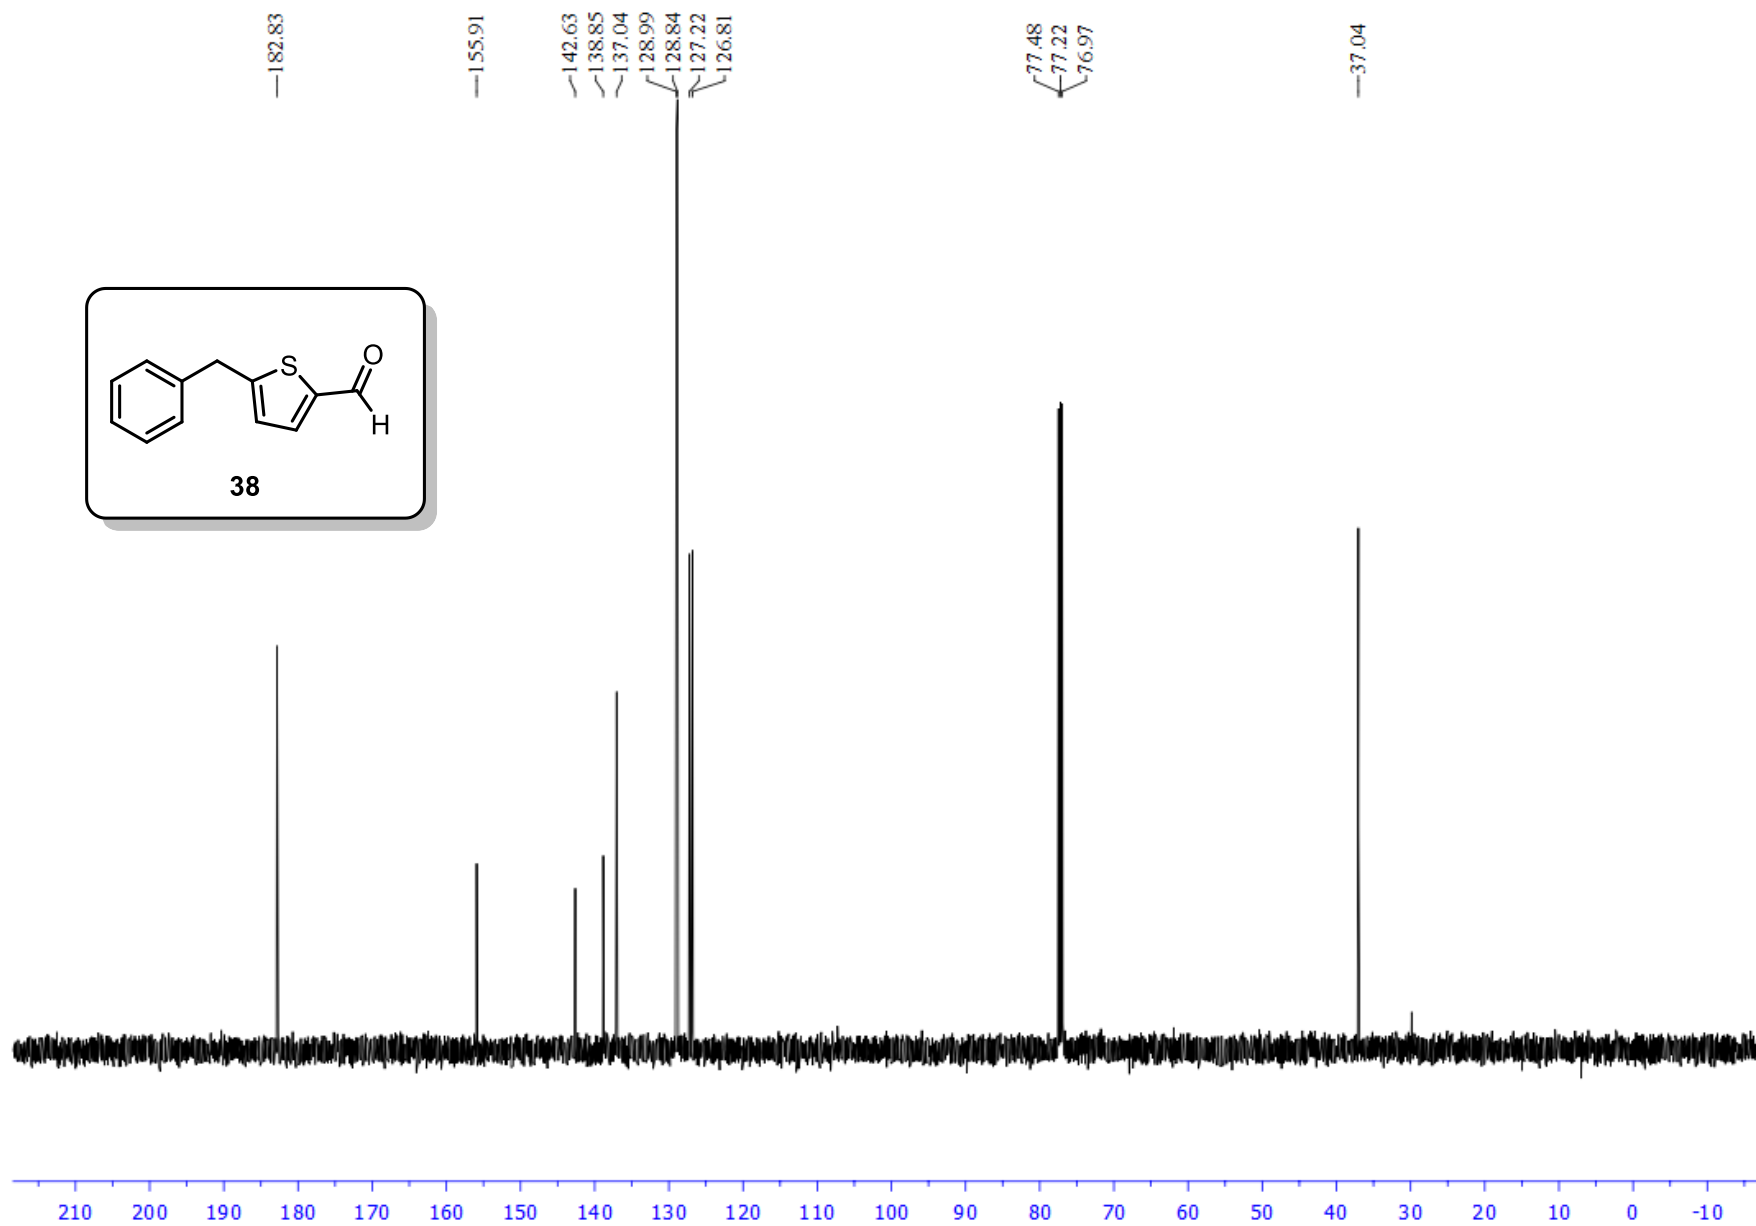

$^1\text{H}$  NMR ( $\text{CDCl}_3$ , 500 MHz) spectrum of 5-benzylthiophene-2-sulfonamide (**39**)

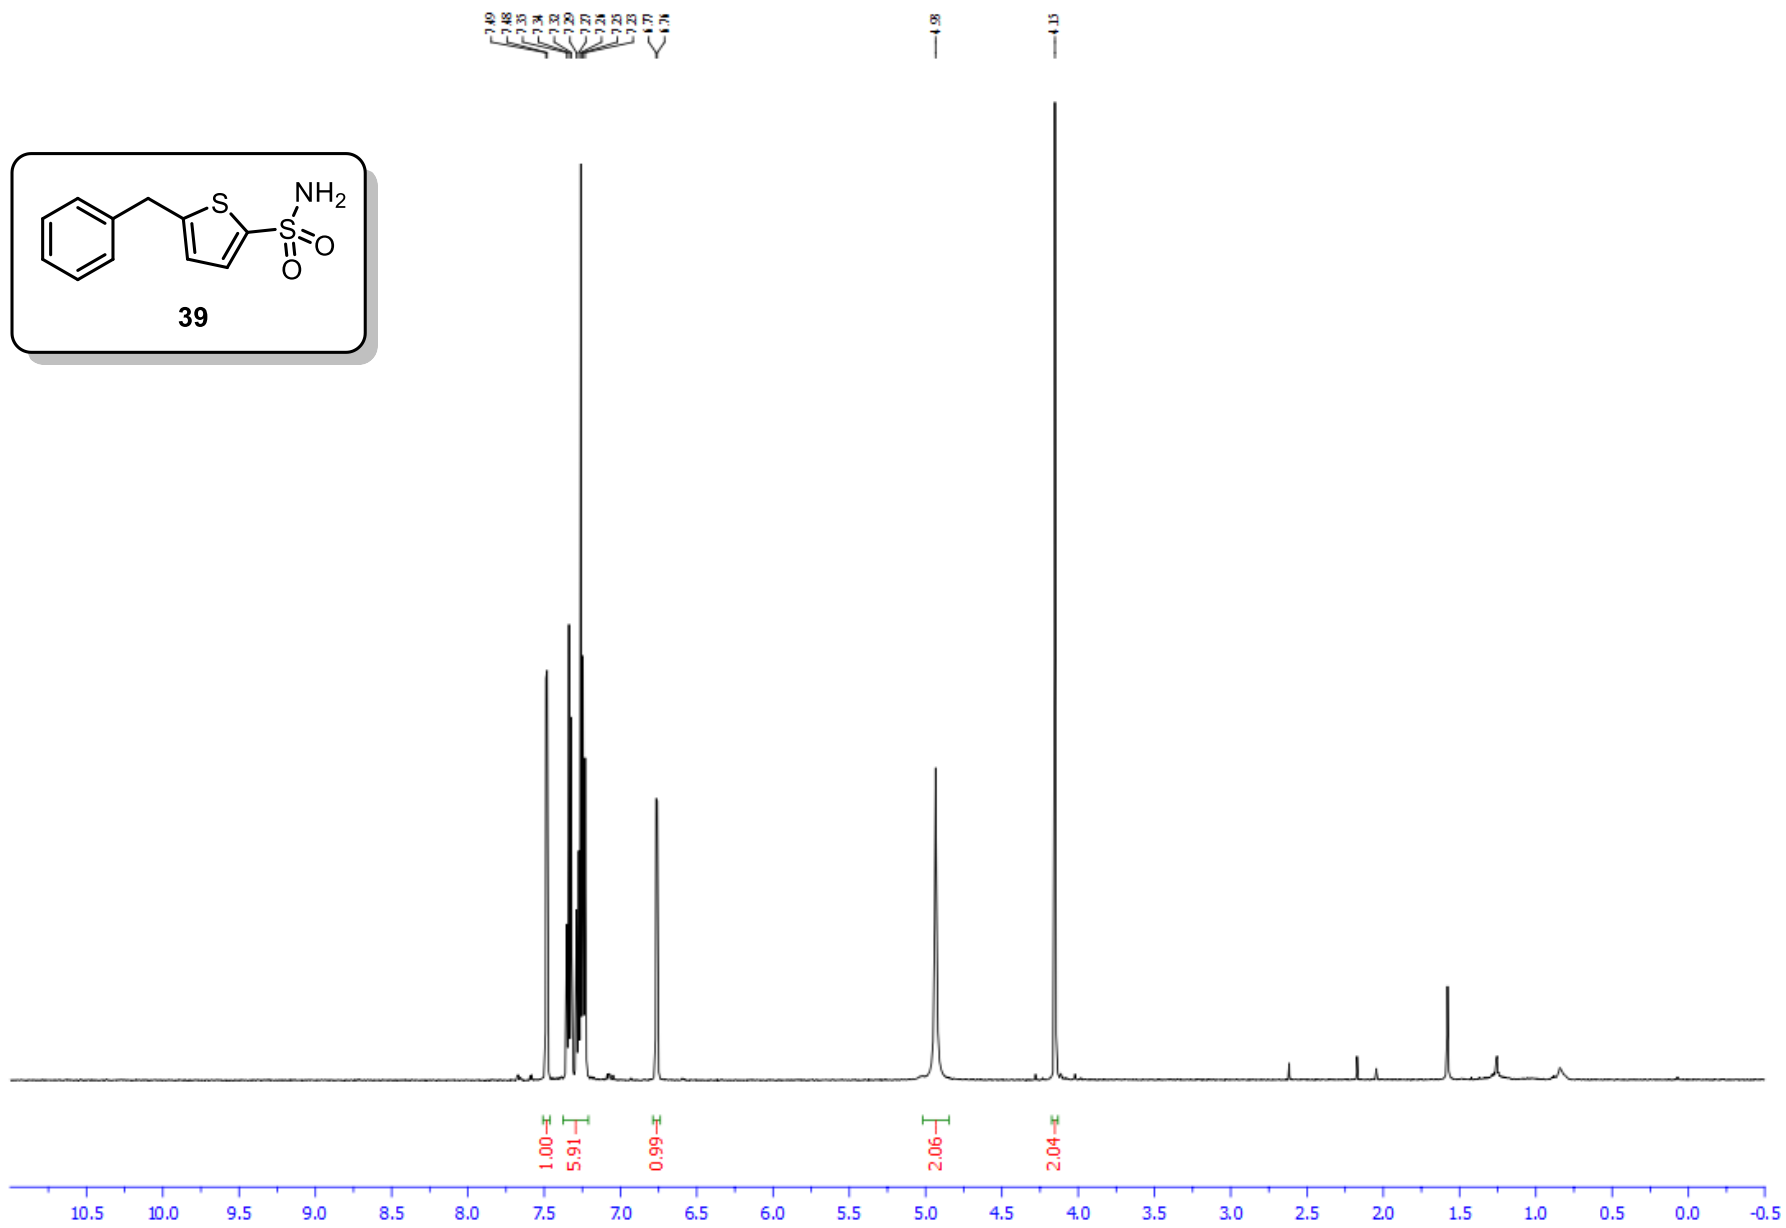

$^{13}\text{C}$  NMR ( $\text{CDCl}_3$ , 125.8 MHz) spectrum of 5-benzylthiophene-2-sulfonamide (**39**)

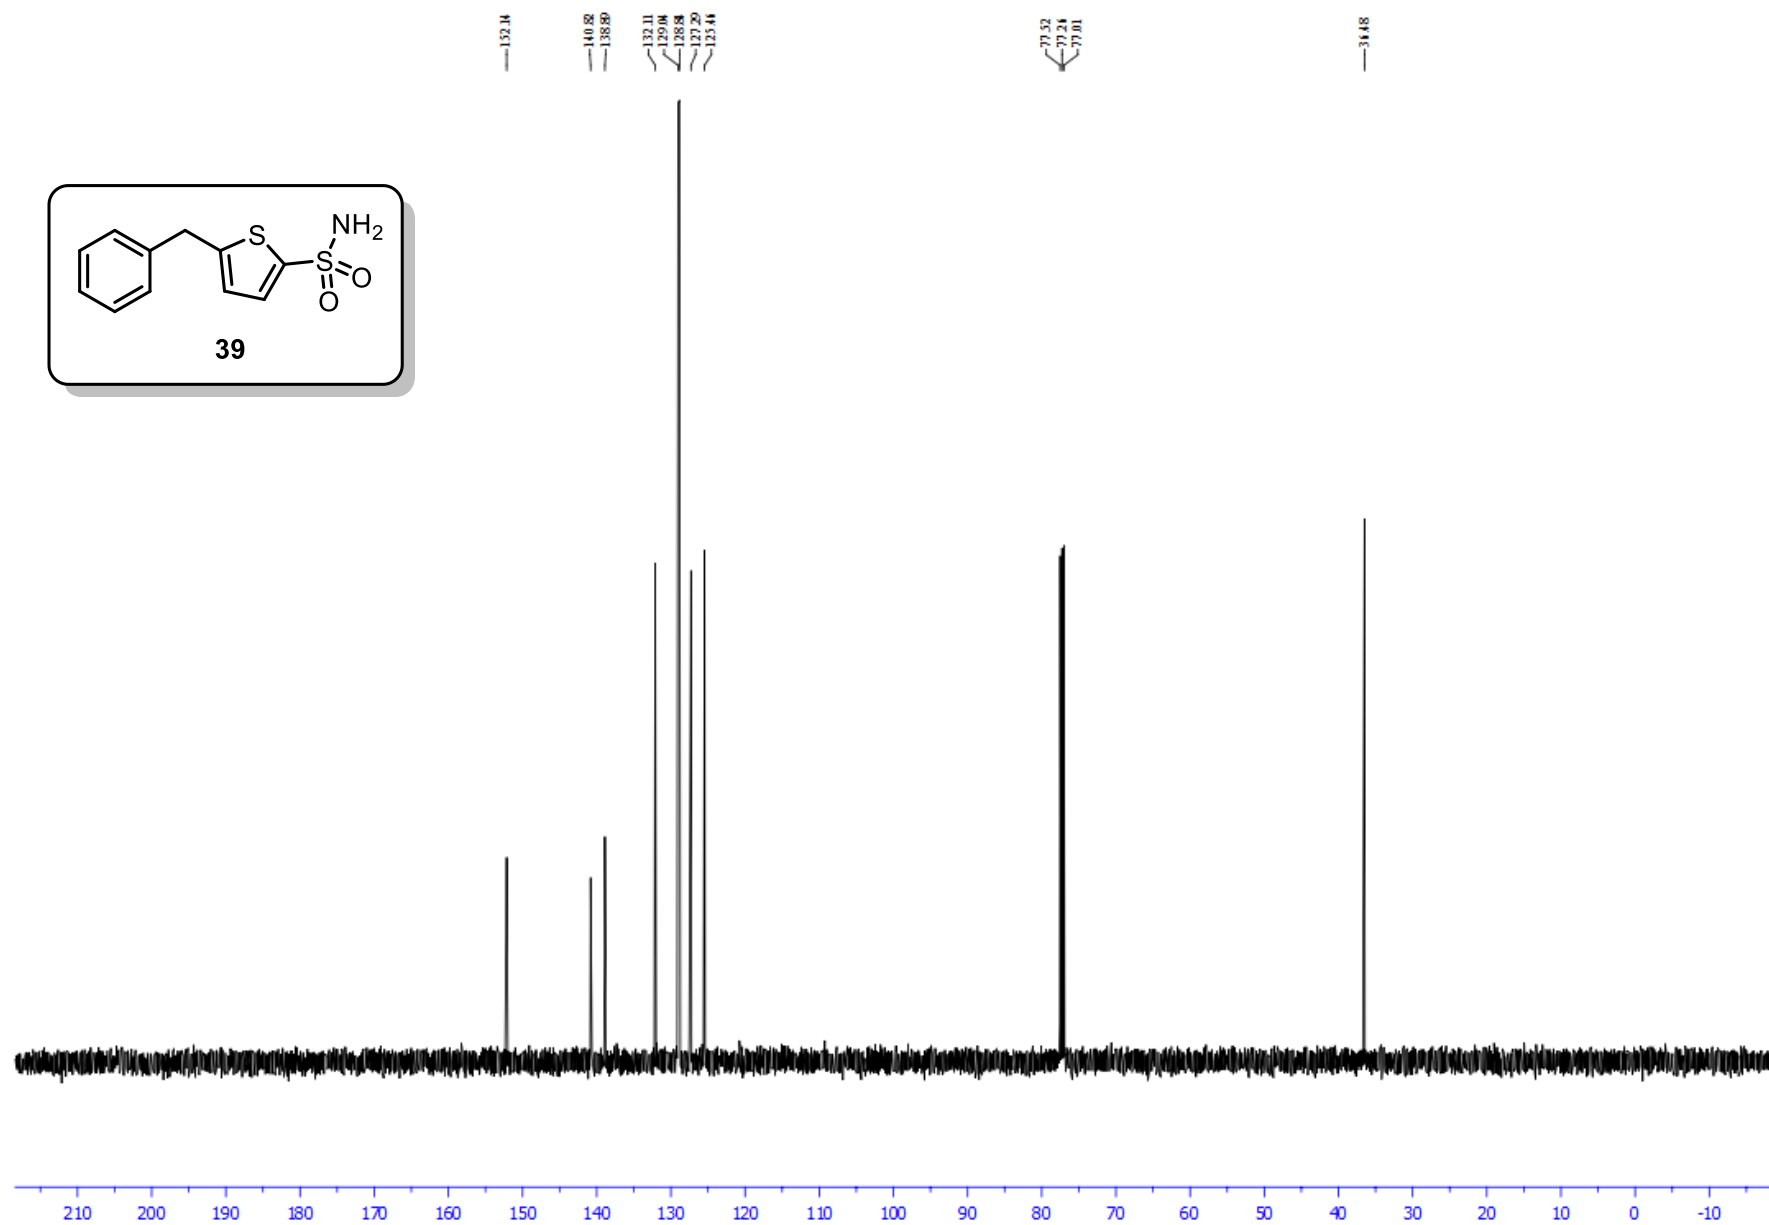

$^1\text{H}$  NMR ( $\text{CDCl}_3$ , 500 MHz) spectrum of 1-benzyl-4-vinylbenzene (**40**)

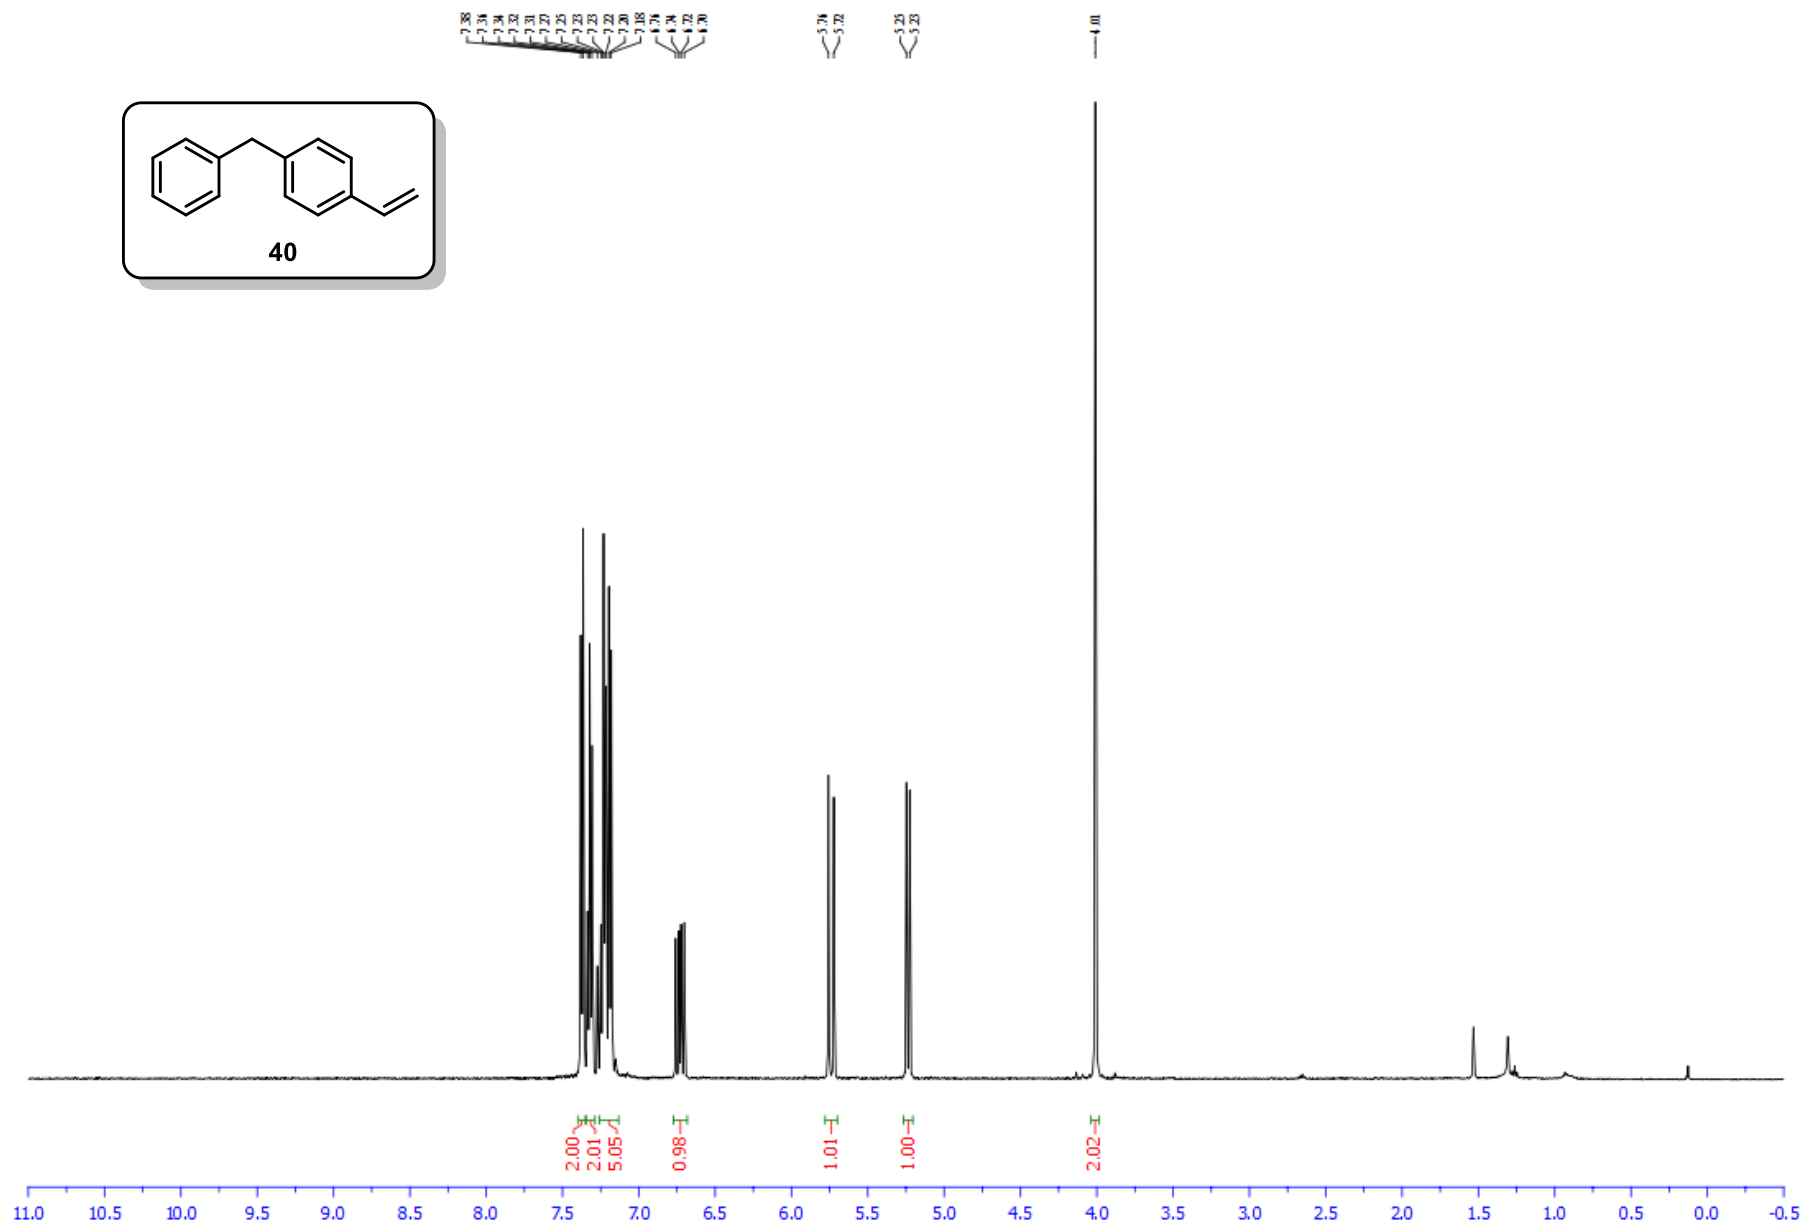

$^{13}\text{C}$  NMR ( $\text{CDCl}_3$ , 125.8 MHz) spectrum of 1-benzyl-4-vinylbenzene (**40**)

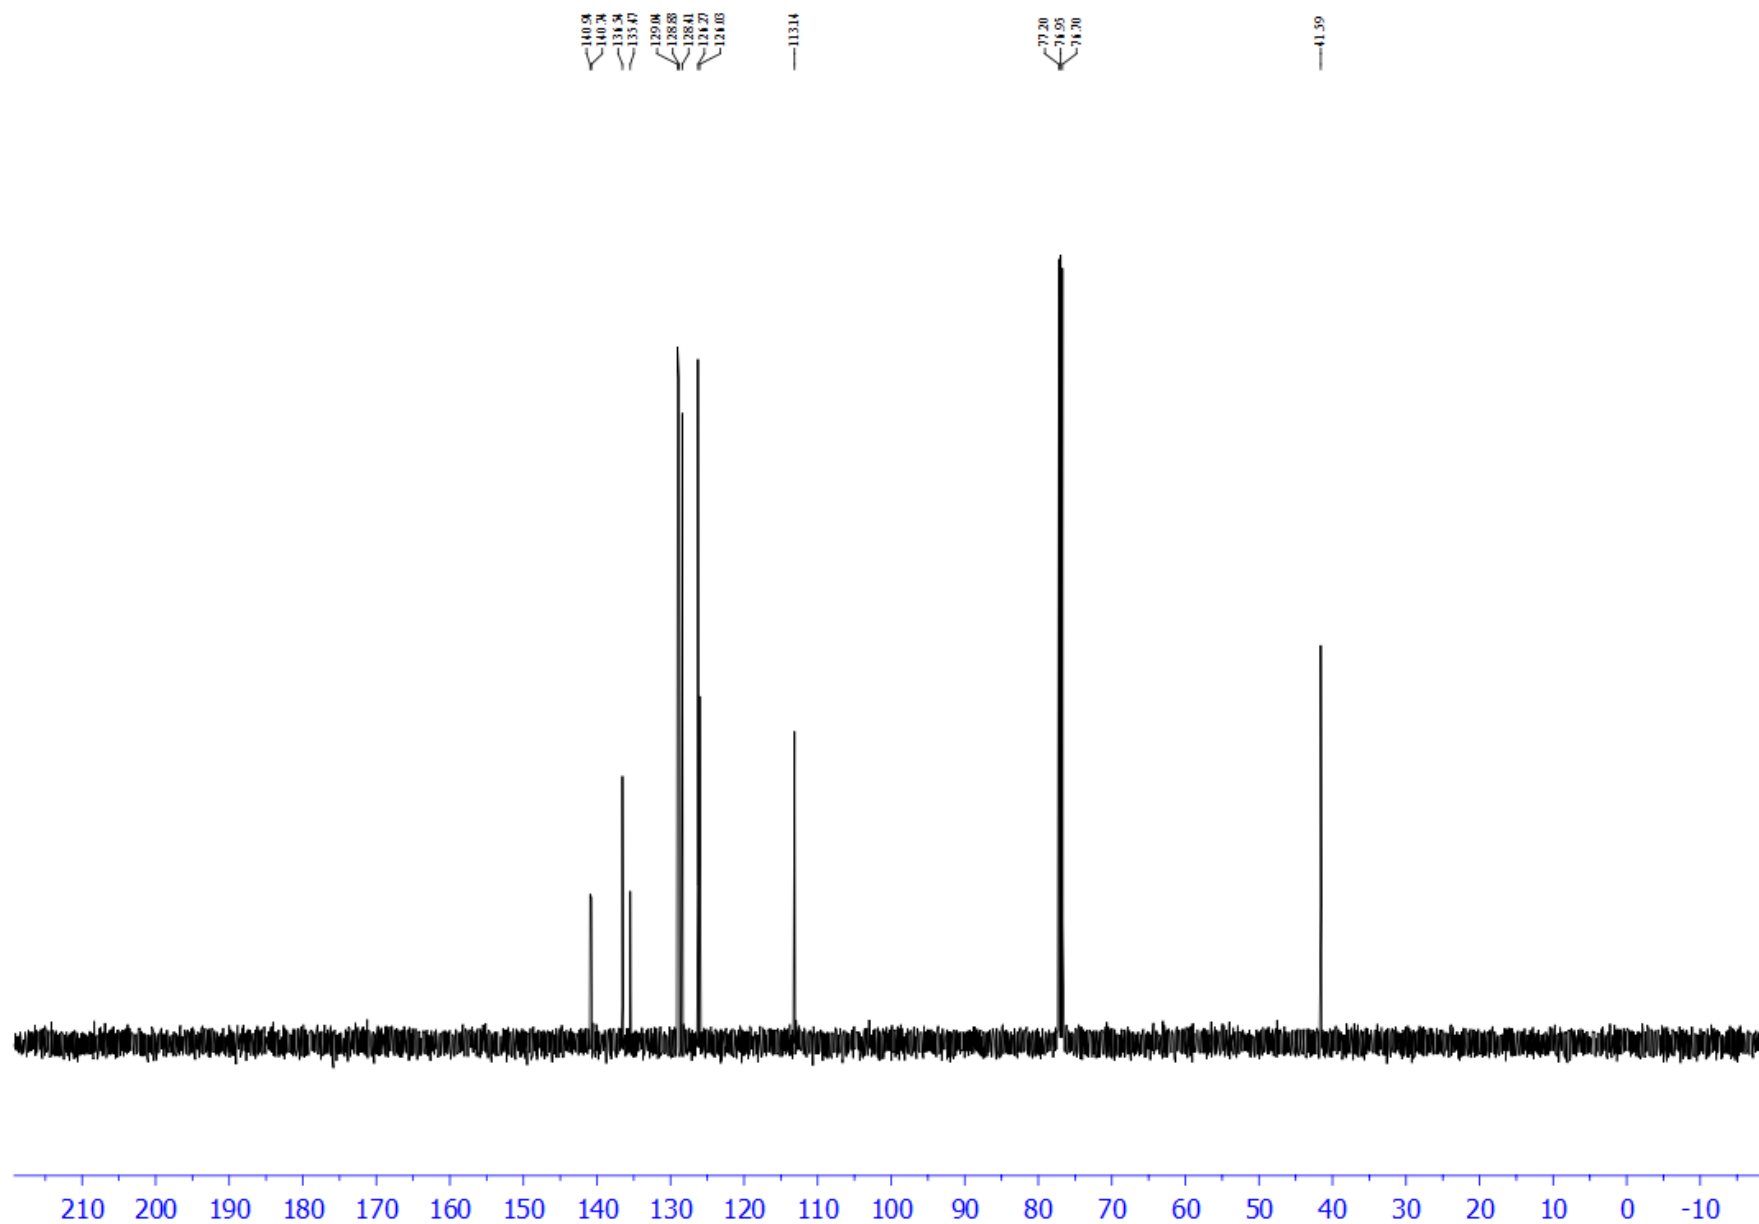

$^1\text{H}$  NMR ( $\text{CDCl}_3$ , 500 MHz) spectrum of 4-(1-(benzyloxy)-3-phenylpropyl)benzonitrile (**42**)

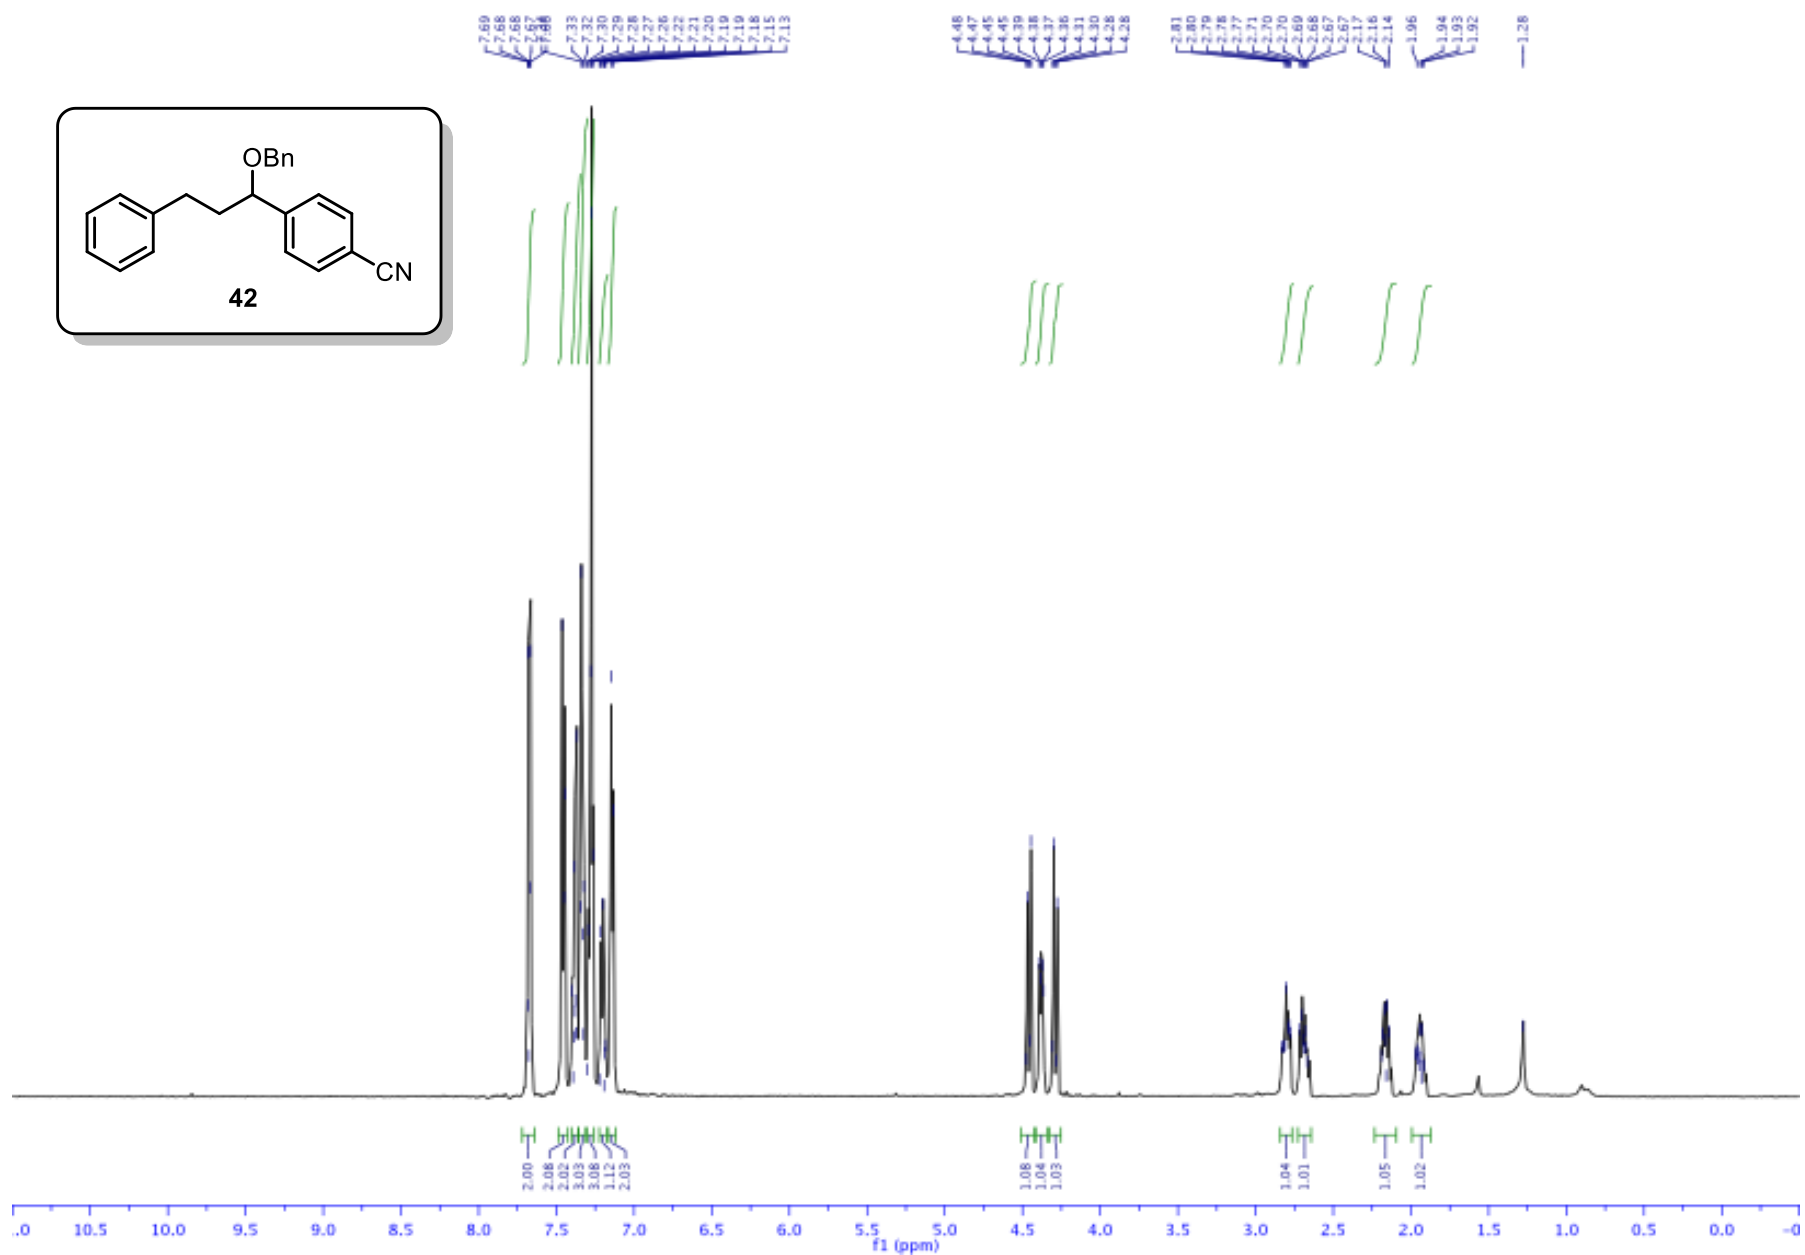

S87



$^{13}\text{C}$  NMR ( $\text{CDCl}_3$ , 125.8 MHz) spectrum of 4-(1-(benzyloxy)-3-phenylpropyl)benzonitrile (**42**)

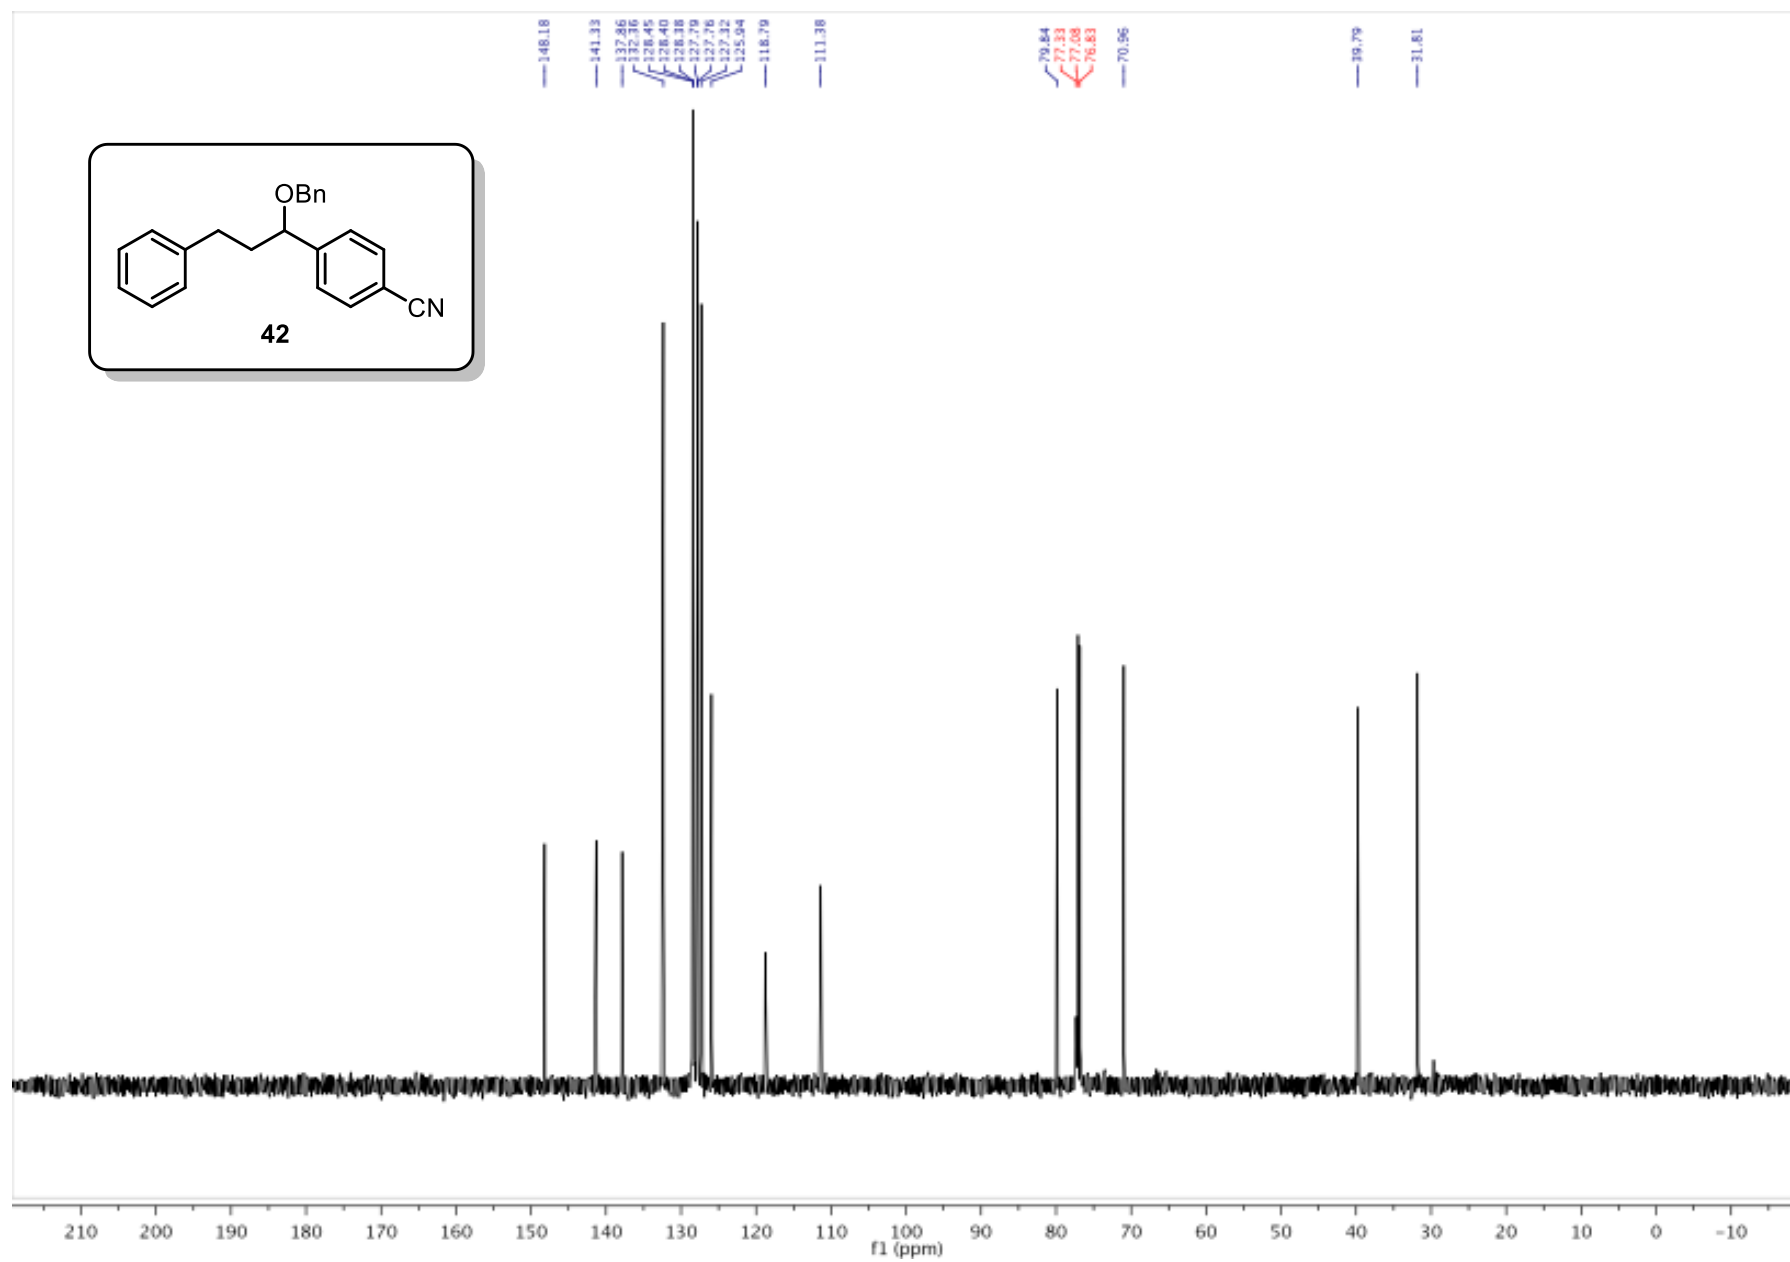

S88

$^1\text{H}$  NMR ( $\text{CDCl}_3$ , 500 MHz) spectrum of methyl 3-(1-phenylethyl)benzoate (**45**)

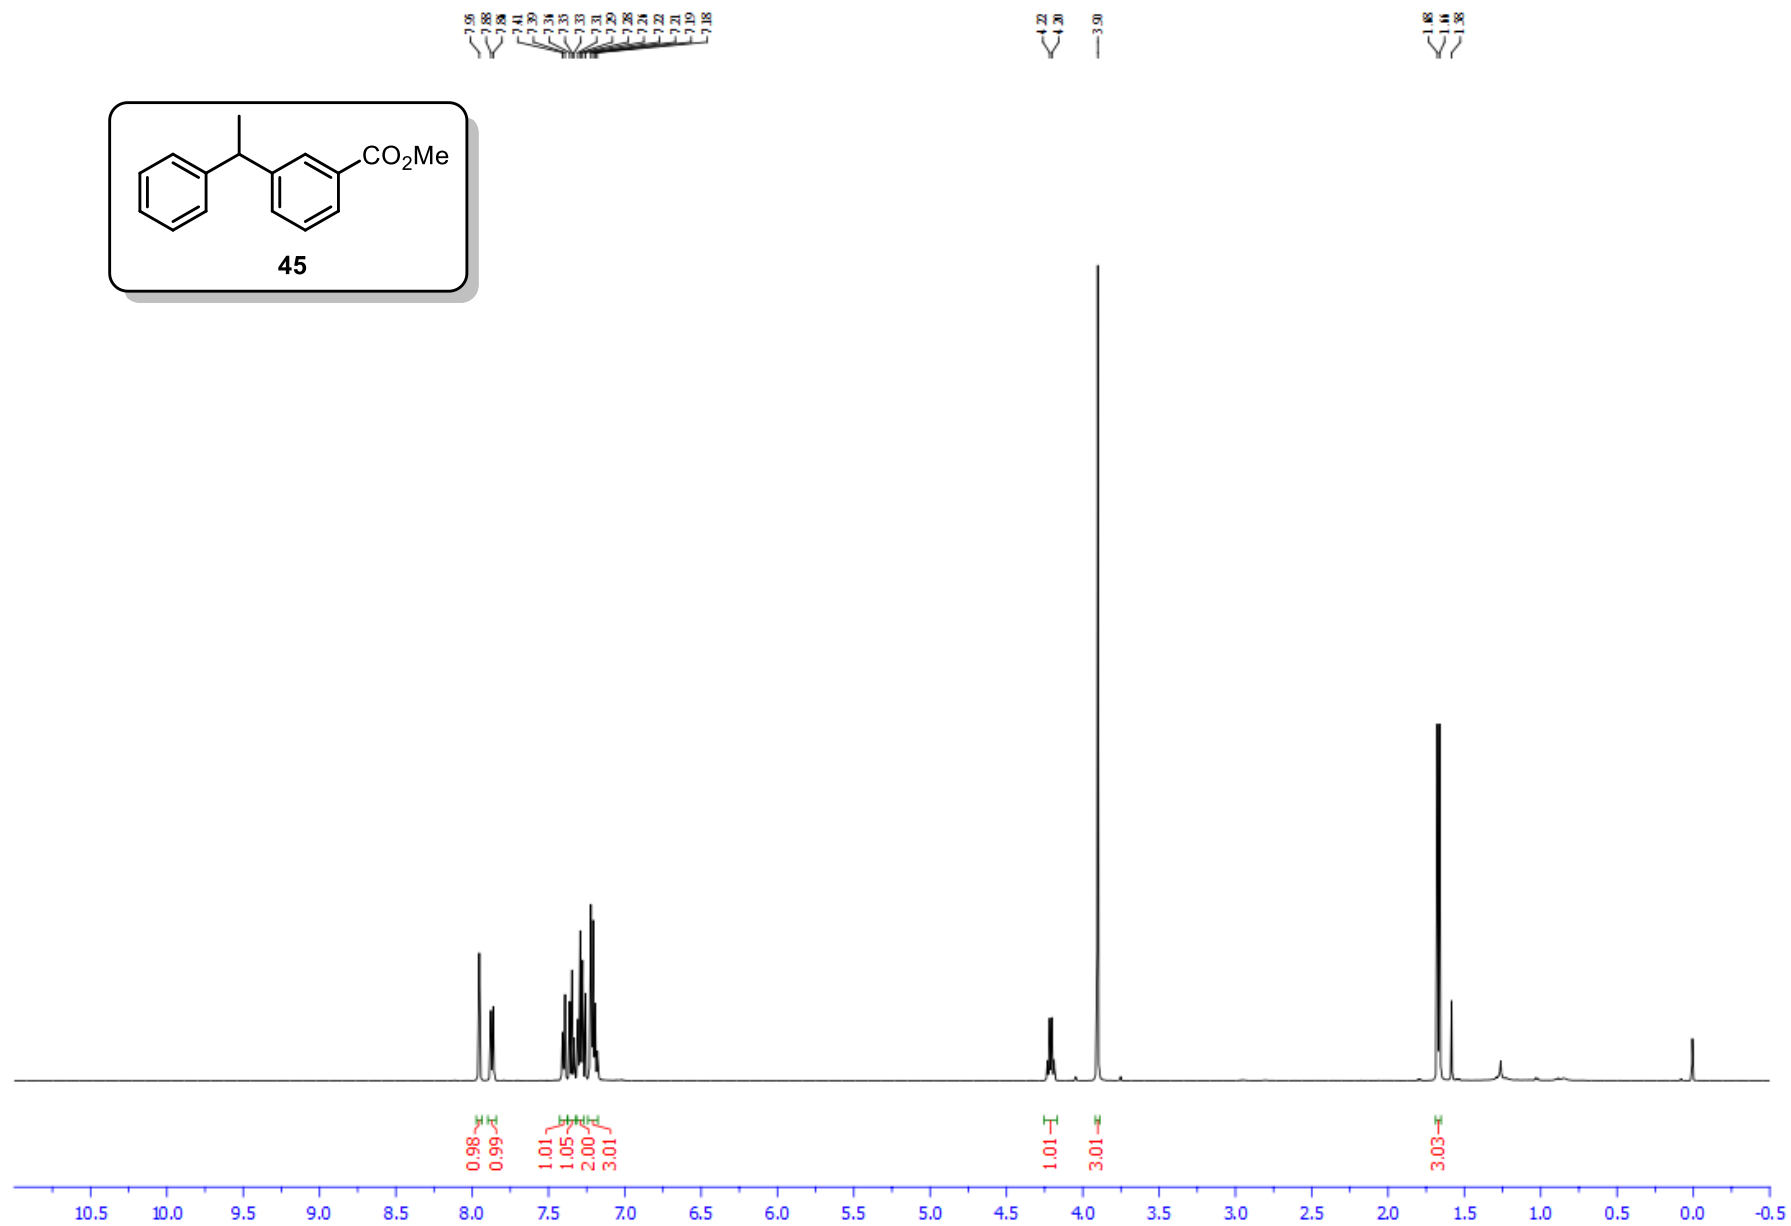

$^{13}\text{C}$  NMR ( $\text{CDCl}_3$ , 125.8 MHz) spectrum of methyl 3-(1-phenylethyl)benzoate (**45**)

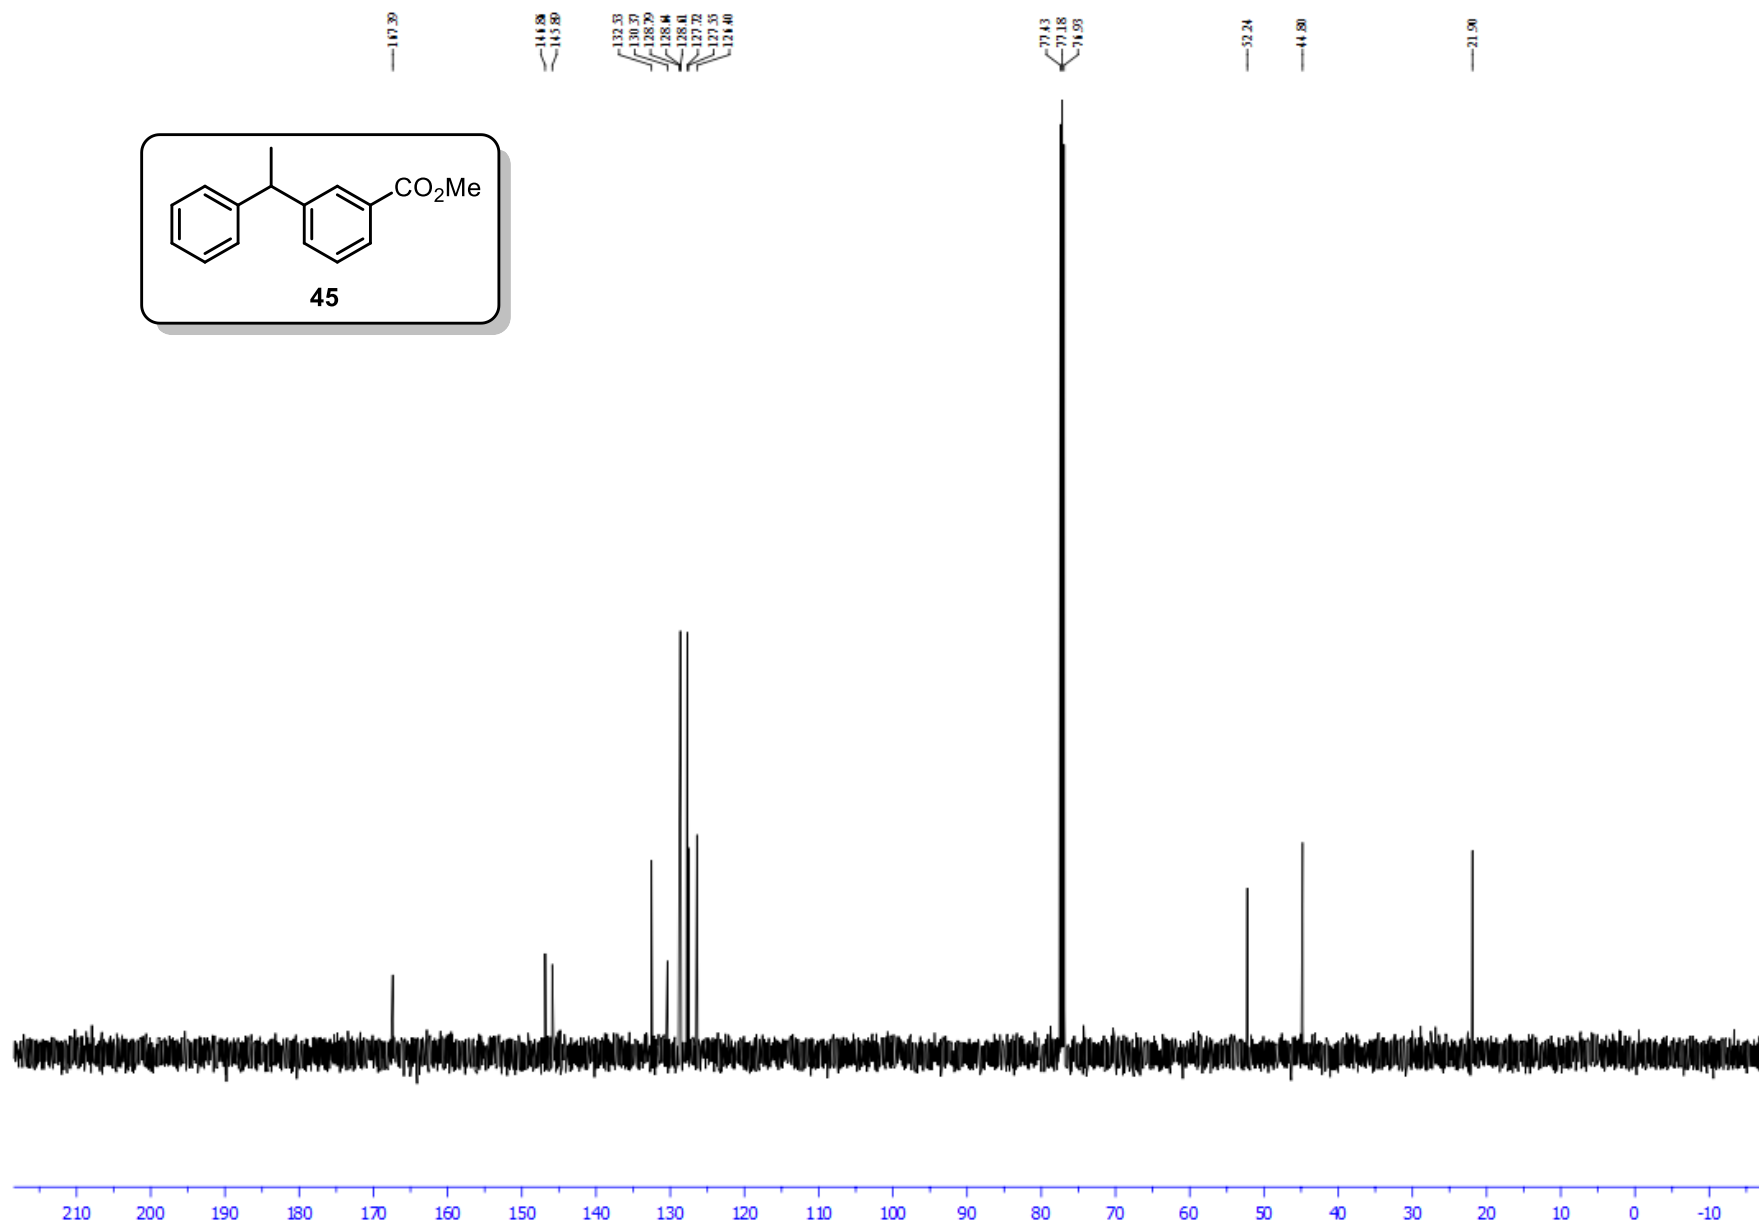

Chiral SFC (OJ-H column: 5% iPrOH in CO<sub>2</sub>, 2.0 mL/min) chromatograms of methyl 3-(1-phenylethyl)benzoate (**45**)

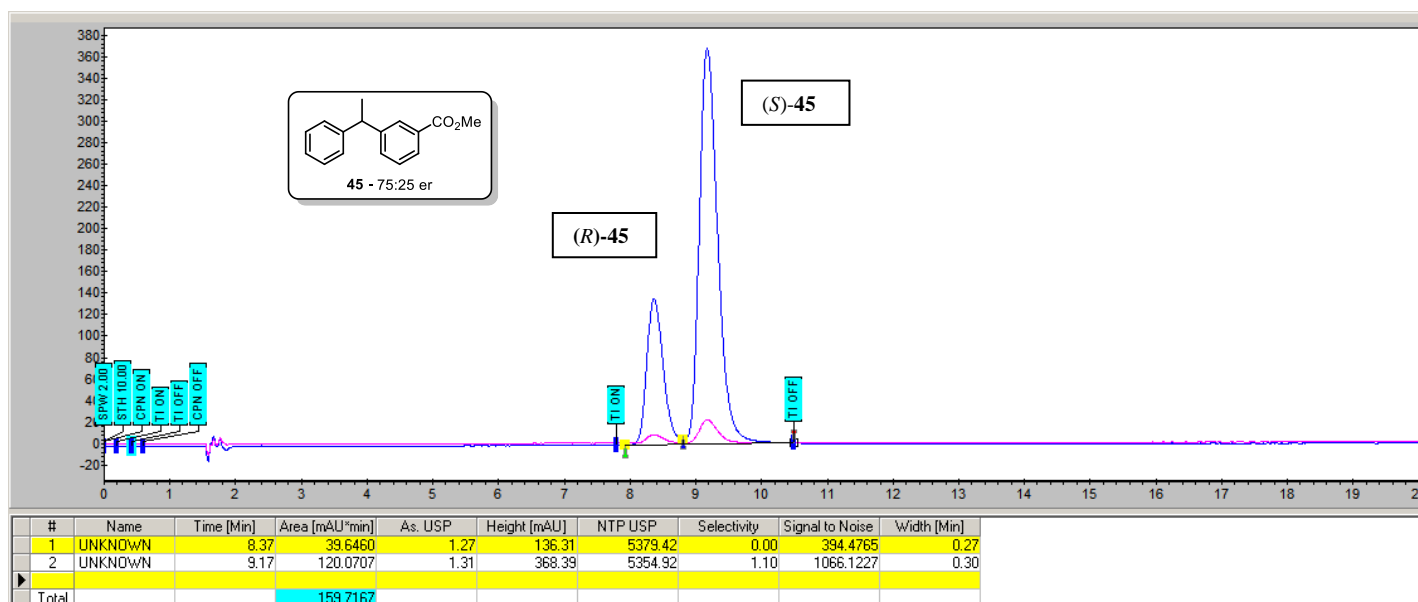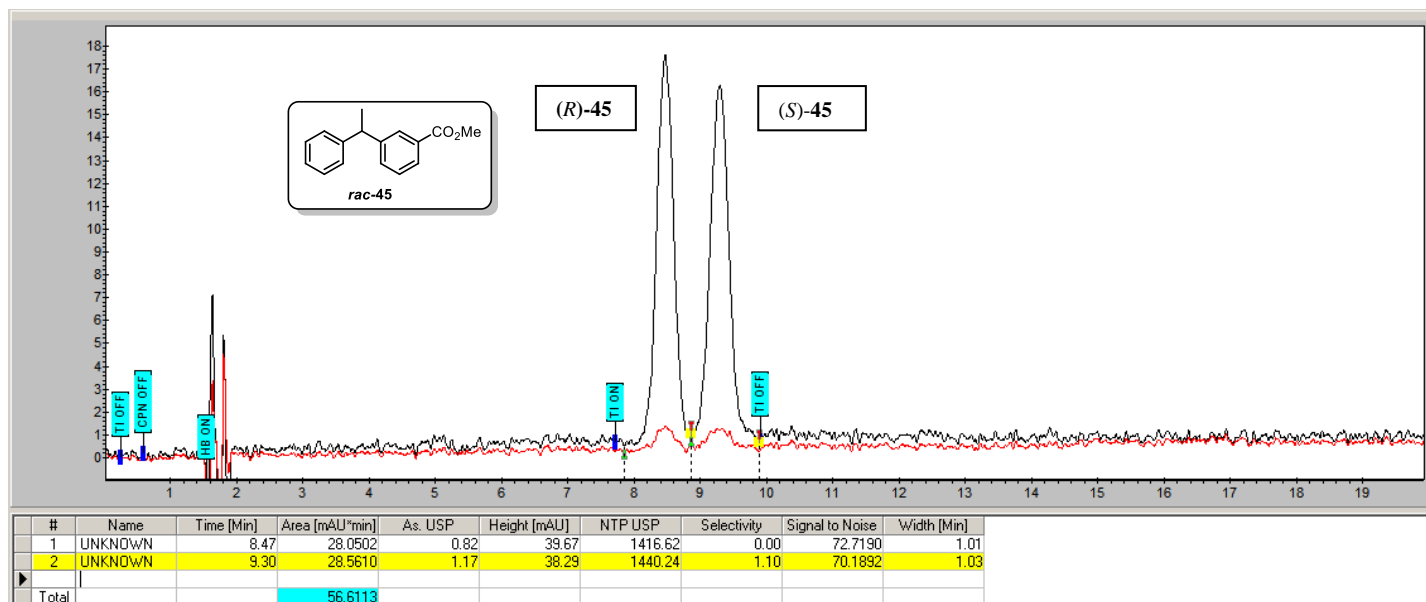

$^1\text{H}$  NMR ( $\text{CDCl}_3$ , 500 MHz) spectrum of 2-(2,4-difluorophenyl)-5-(trifluoromethyl)pyridine (**S3**)

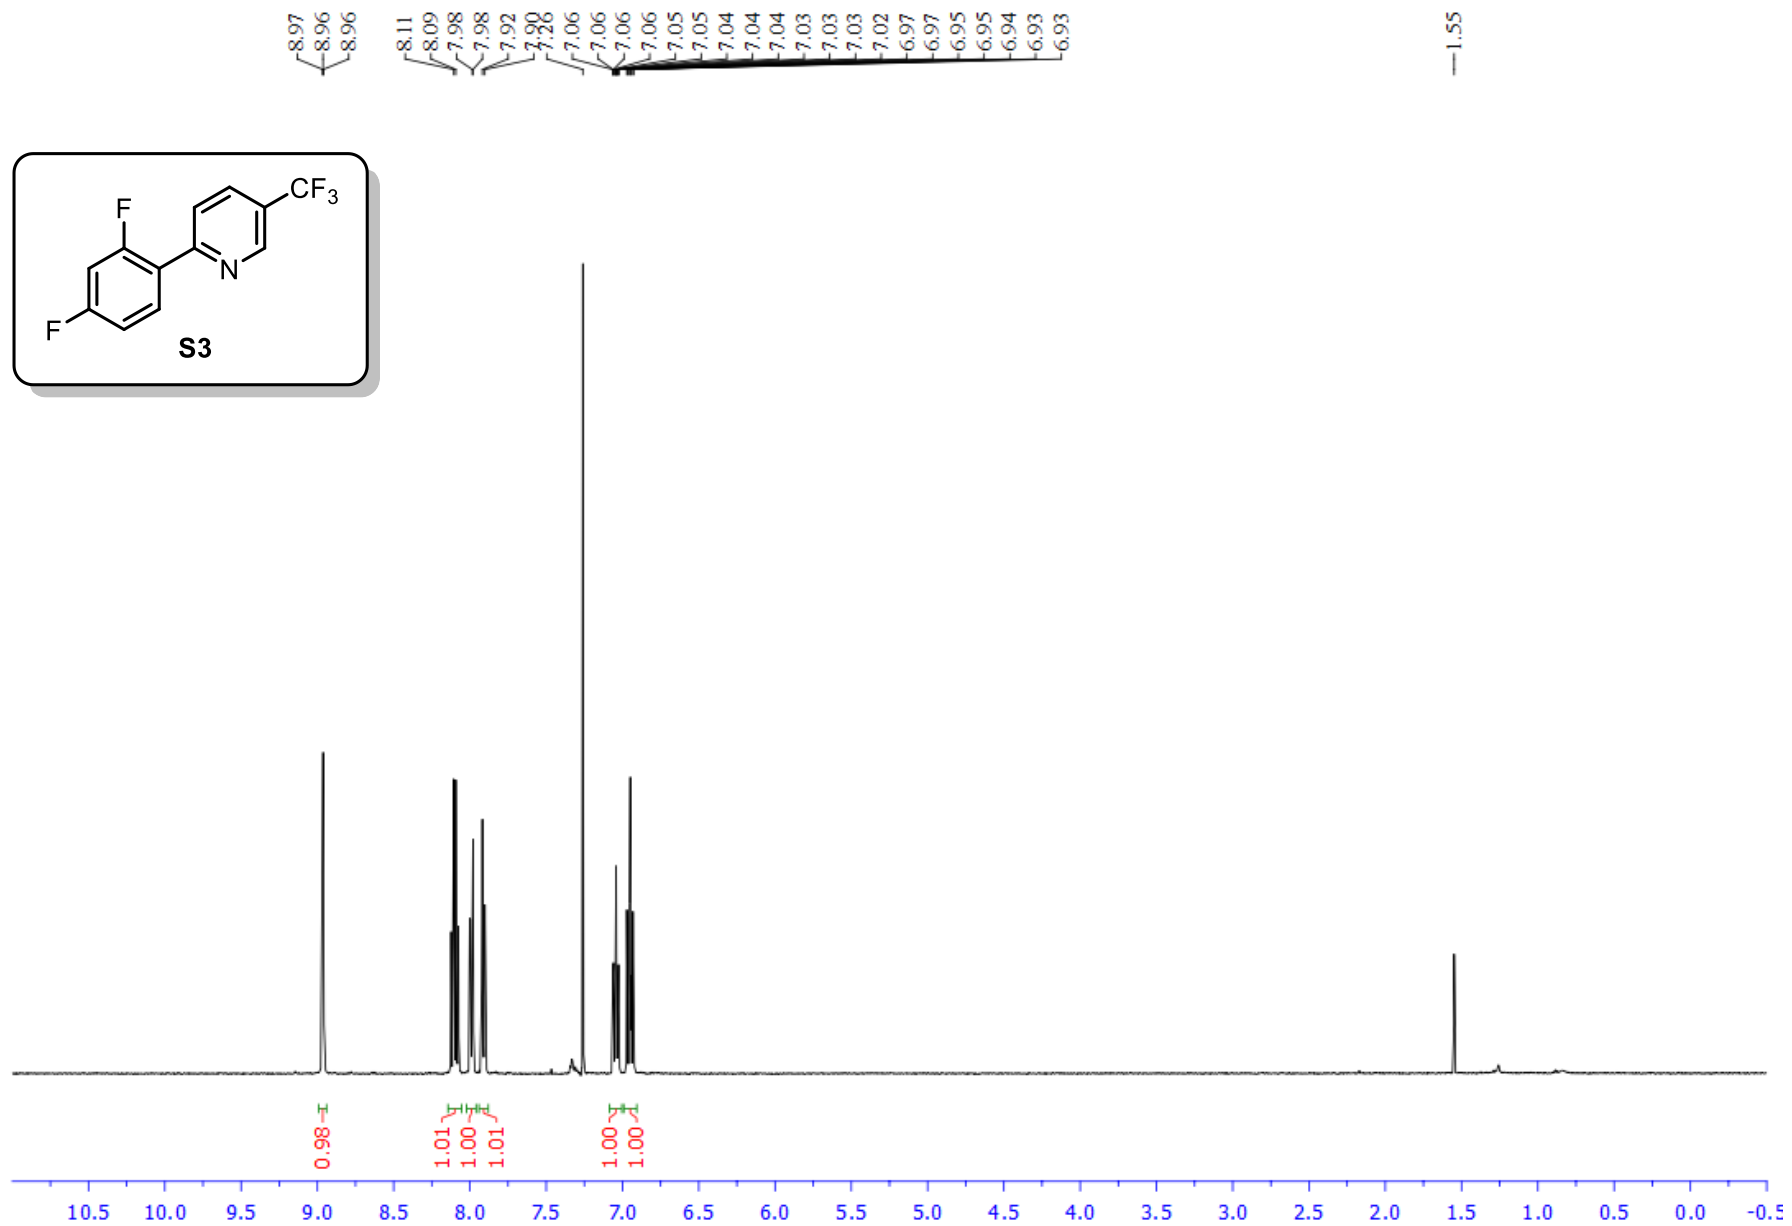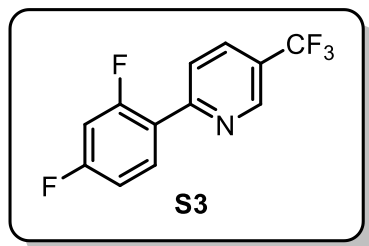

$^{13}\text{C}$  NMR ( $\text{CDCl}_3$ , 125.8 MHz) spectrum of 2-(2,4-difluorophenyl)-5-(trifluoromethyl)pyridine (**S3**)

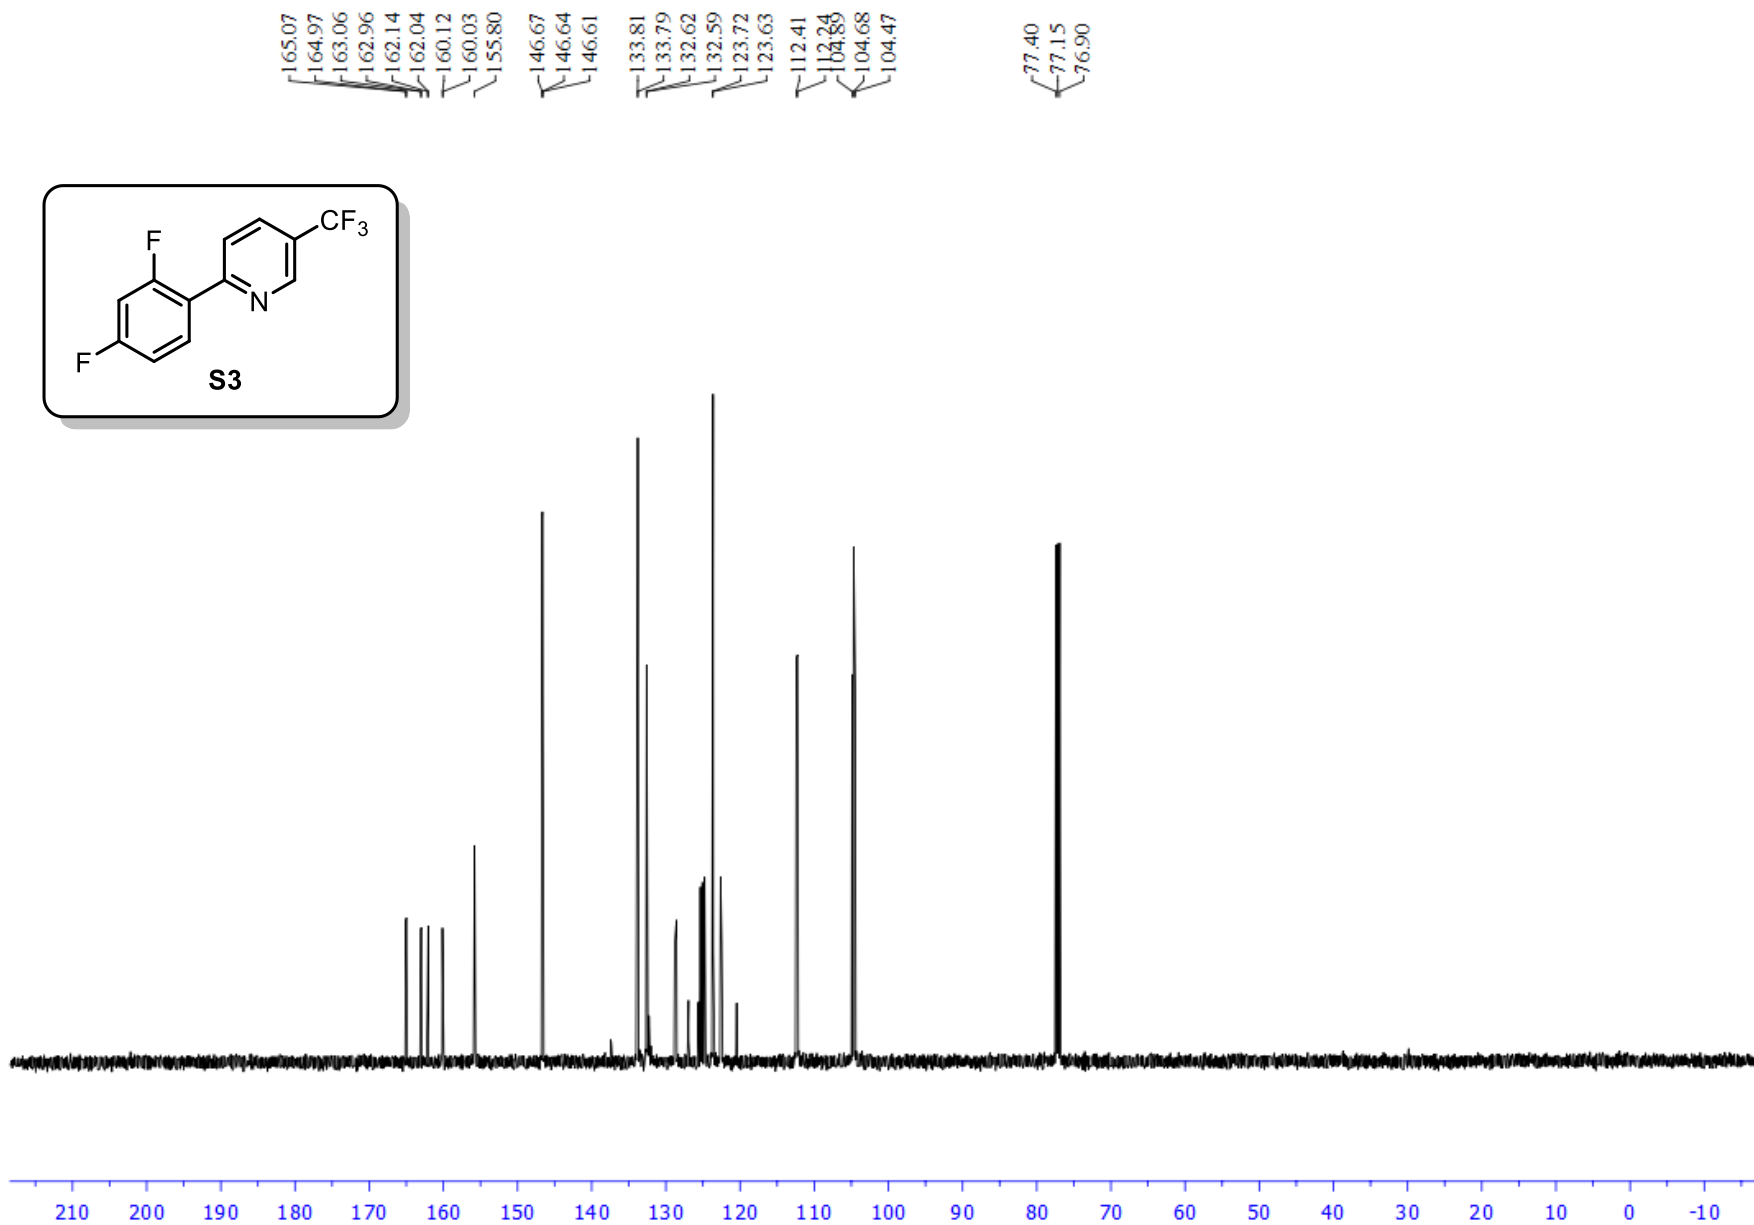

S93

$^{19}\text{F}$  NMR ( $\text{CDCl}_3$ , 470.8 MHz) spectrum of 2-(2,4-difluorophenyl)-5-(trifluoromethyl)pyridine (**S3**)

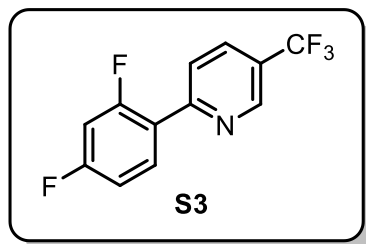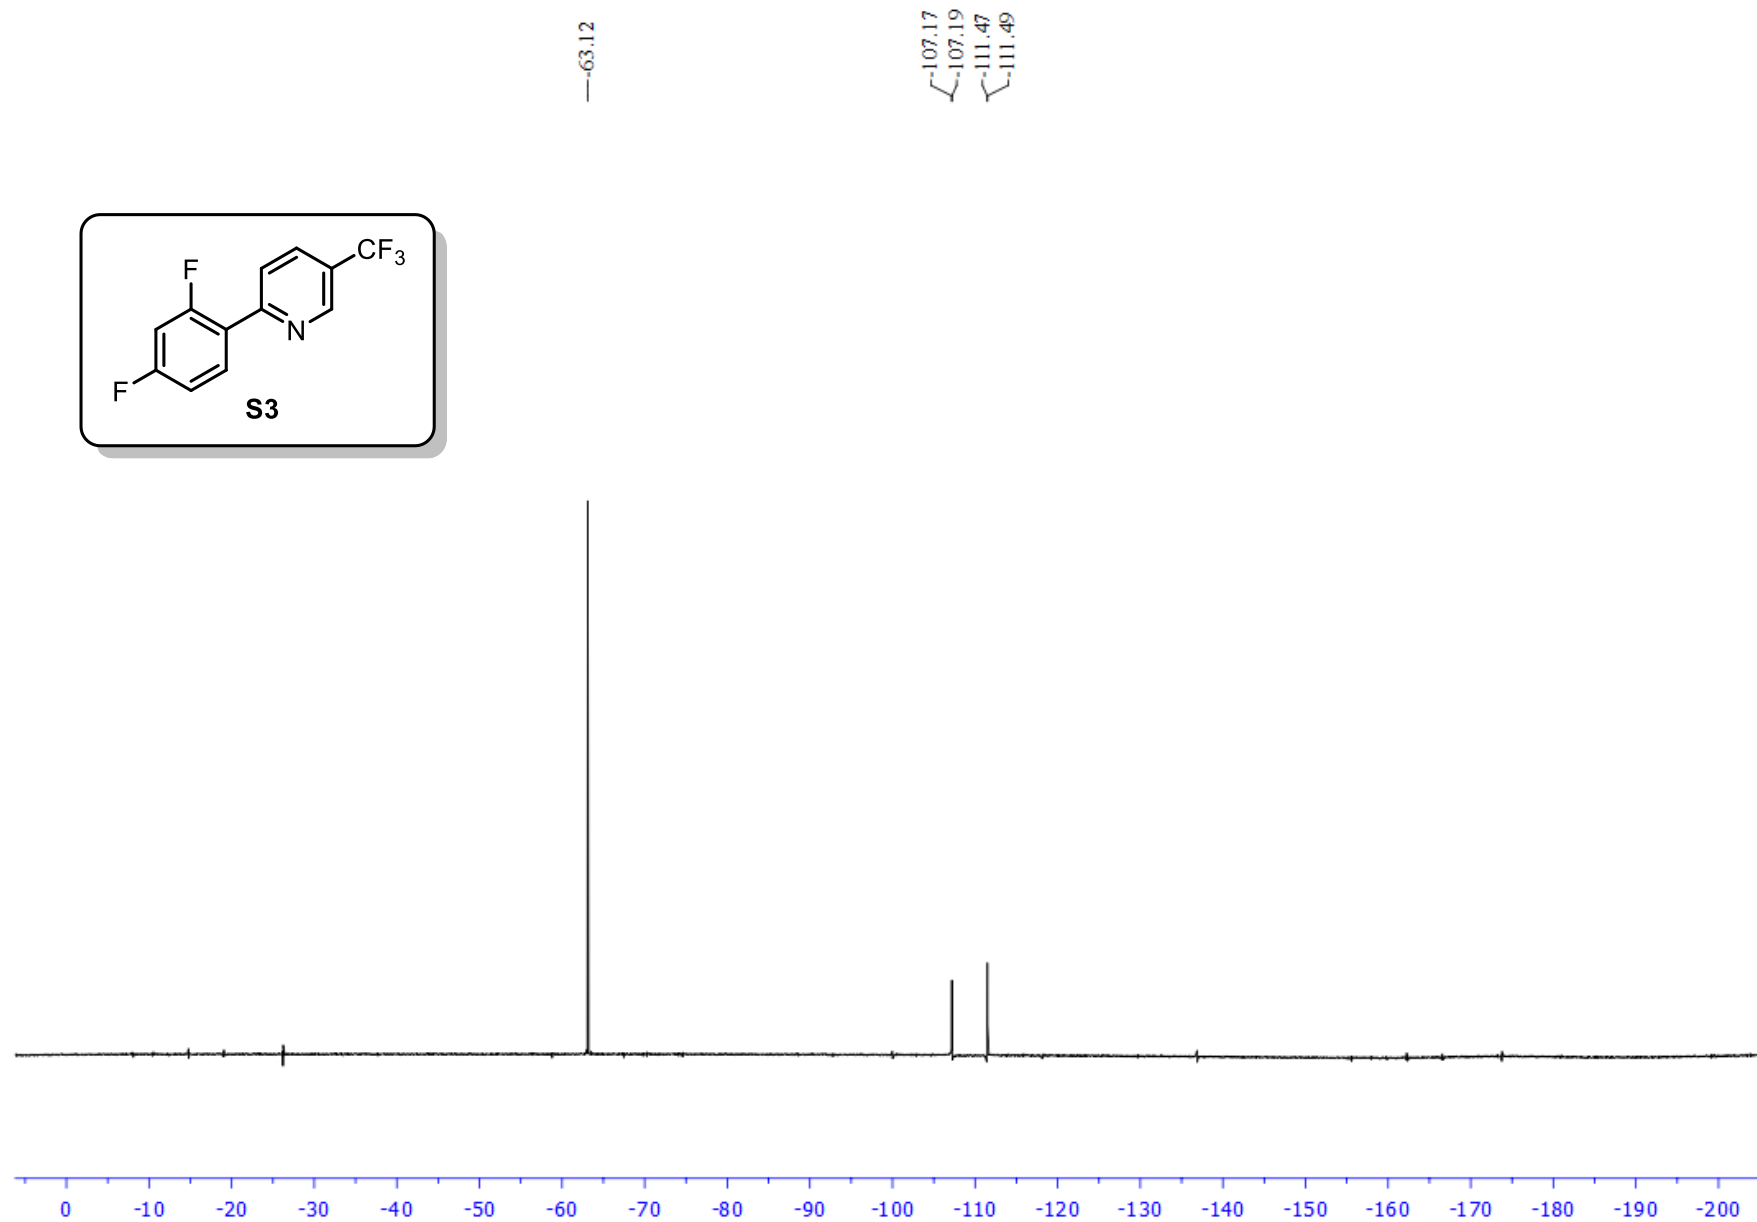

S94

$^1\text{H}$  NMR (acetone- $d_6$ , 500 MHz) spectrum of potassium (benzo[d][1,3]dioxol-5-ylmethyl)trifluoroborate (**S5**)

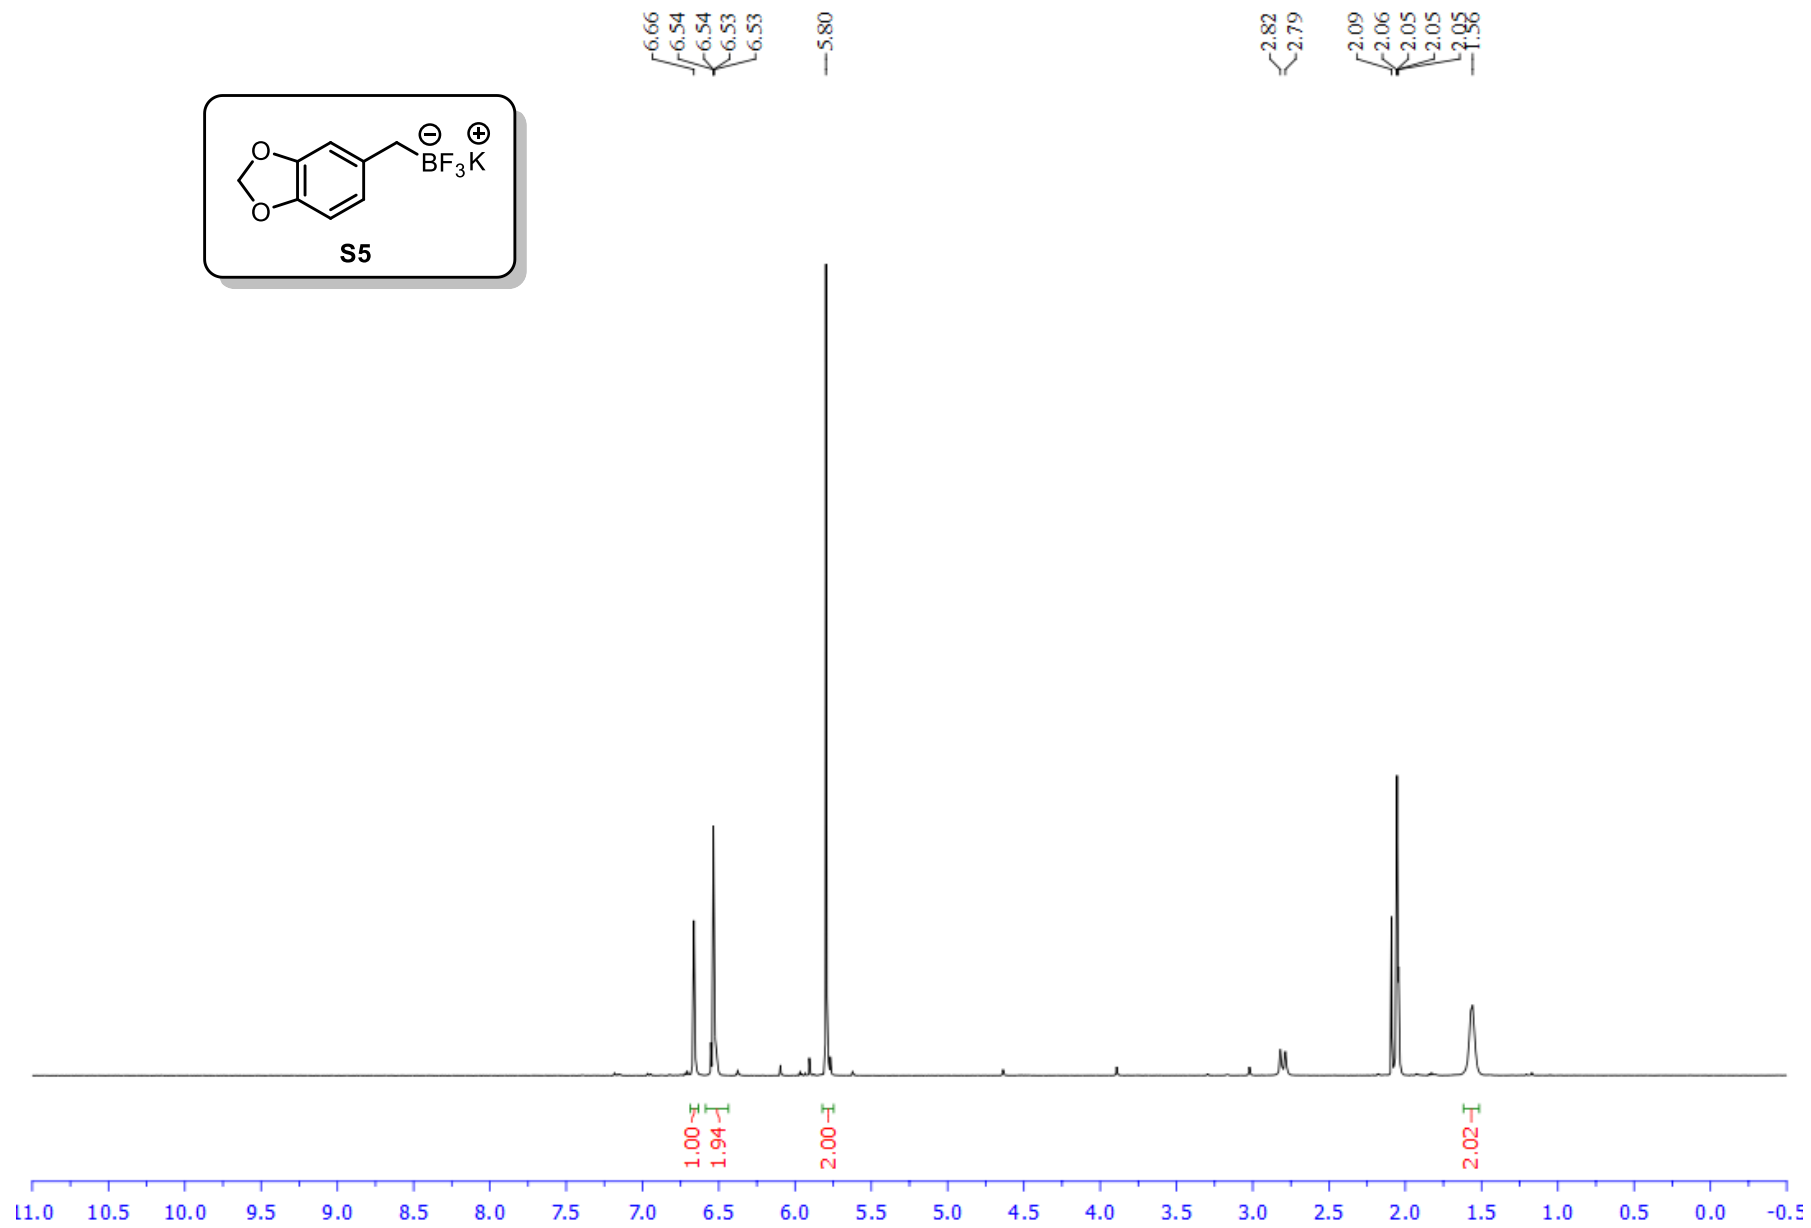

**S95**



$^{13}\text{C}$  NMR (acetone- $d_6$ , 125.8 MHz) spectrum of potassium (benzo[d][1,3]dioxol-5-ylmethyl)trifluoroborate (**S5**)

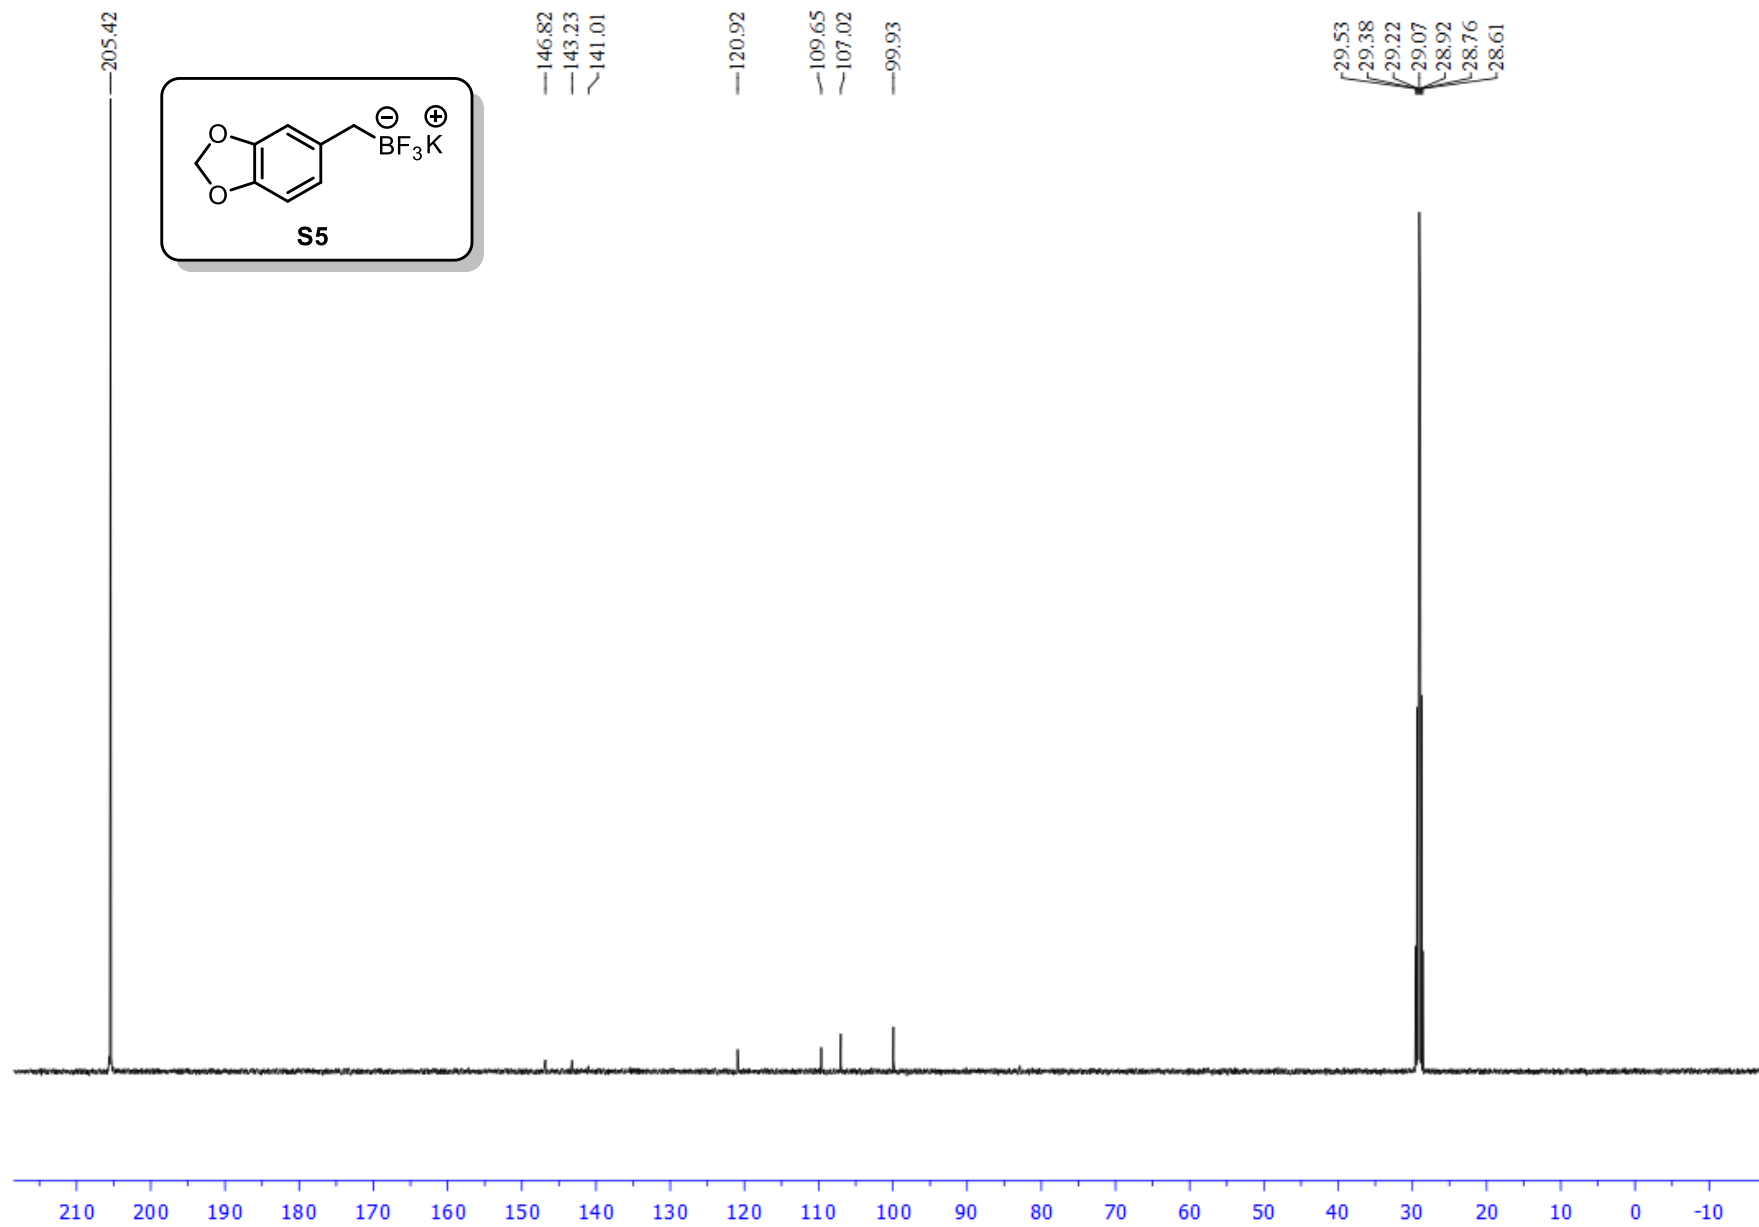

S96

$^{11}\text{B}$  NMR (acetone- $d_6$ , 128.4 MHz) spectrum of potassium (benzo[d][1,3]dioxol-5-ylmethyl)trifluoroborate (**S5**)

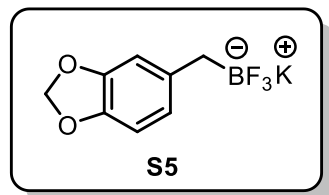

4.32  
3.92

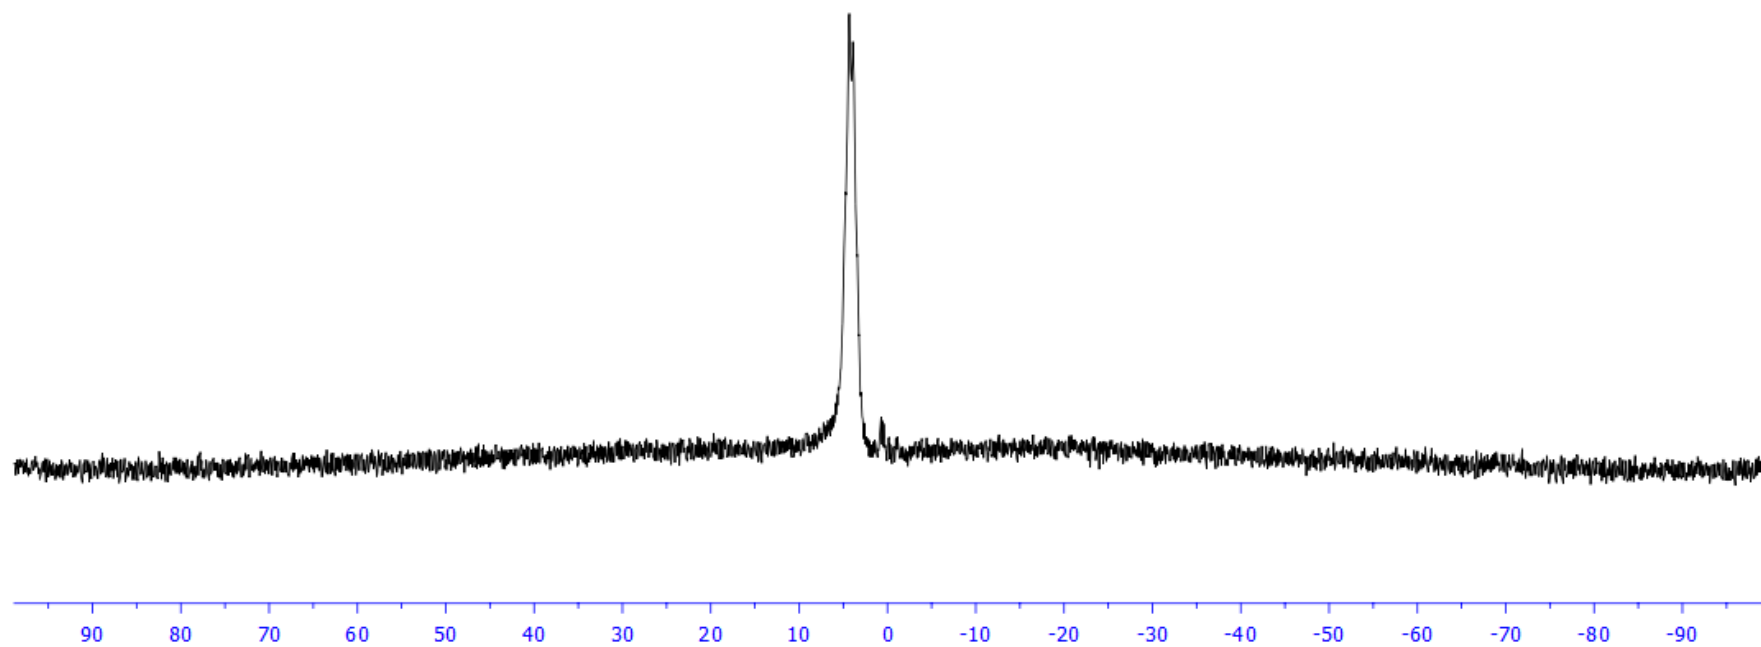

**S97**

$^{19}\text{F}$  NMR (acetone- $d_6$ , 282.4 MHz) spectrum of potassium (benzo[d][1,3]dioxol-5-ylmethyl)trifluoroborate (**S5**)

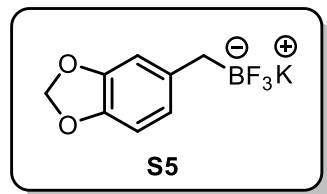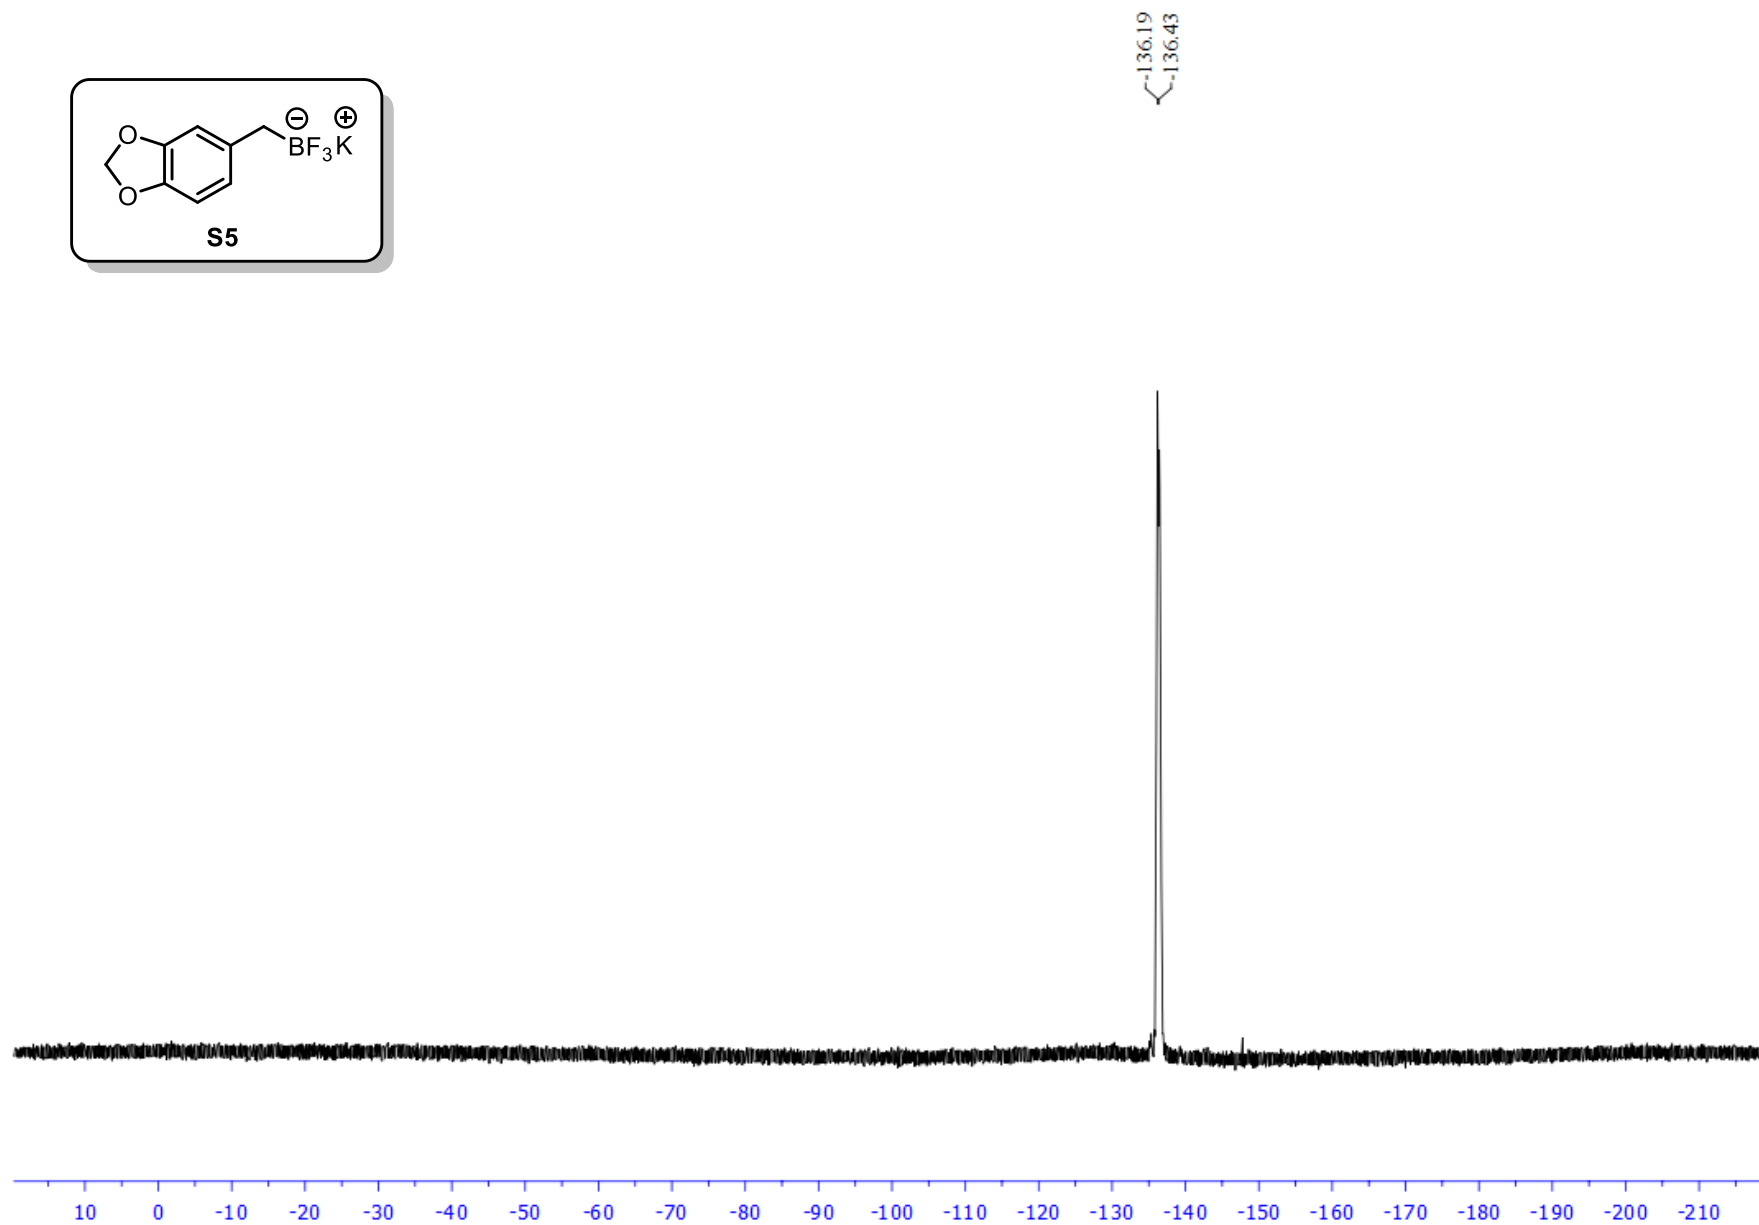

$^1\text{H}$  NMR (acetone- $d_6$ , 500 MHz) spectrum potassium trifluoro(4-(methoxycarbonyl)benzyl)borate (**S6**)

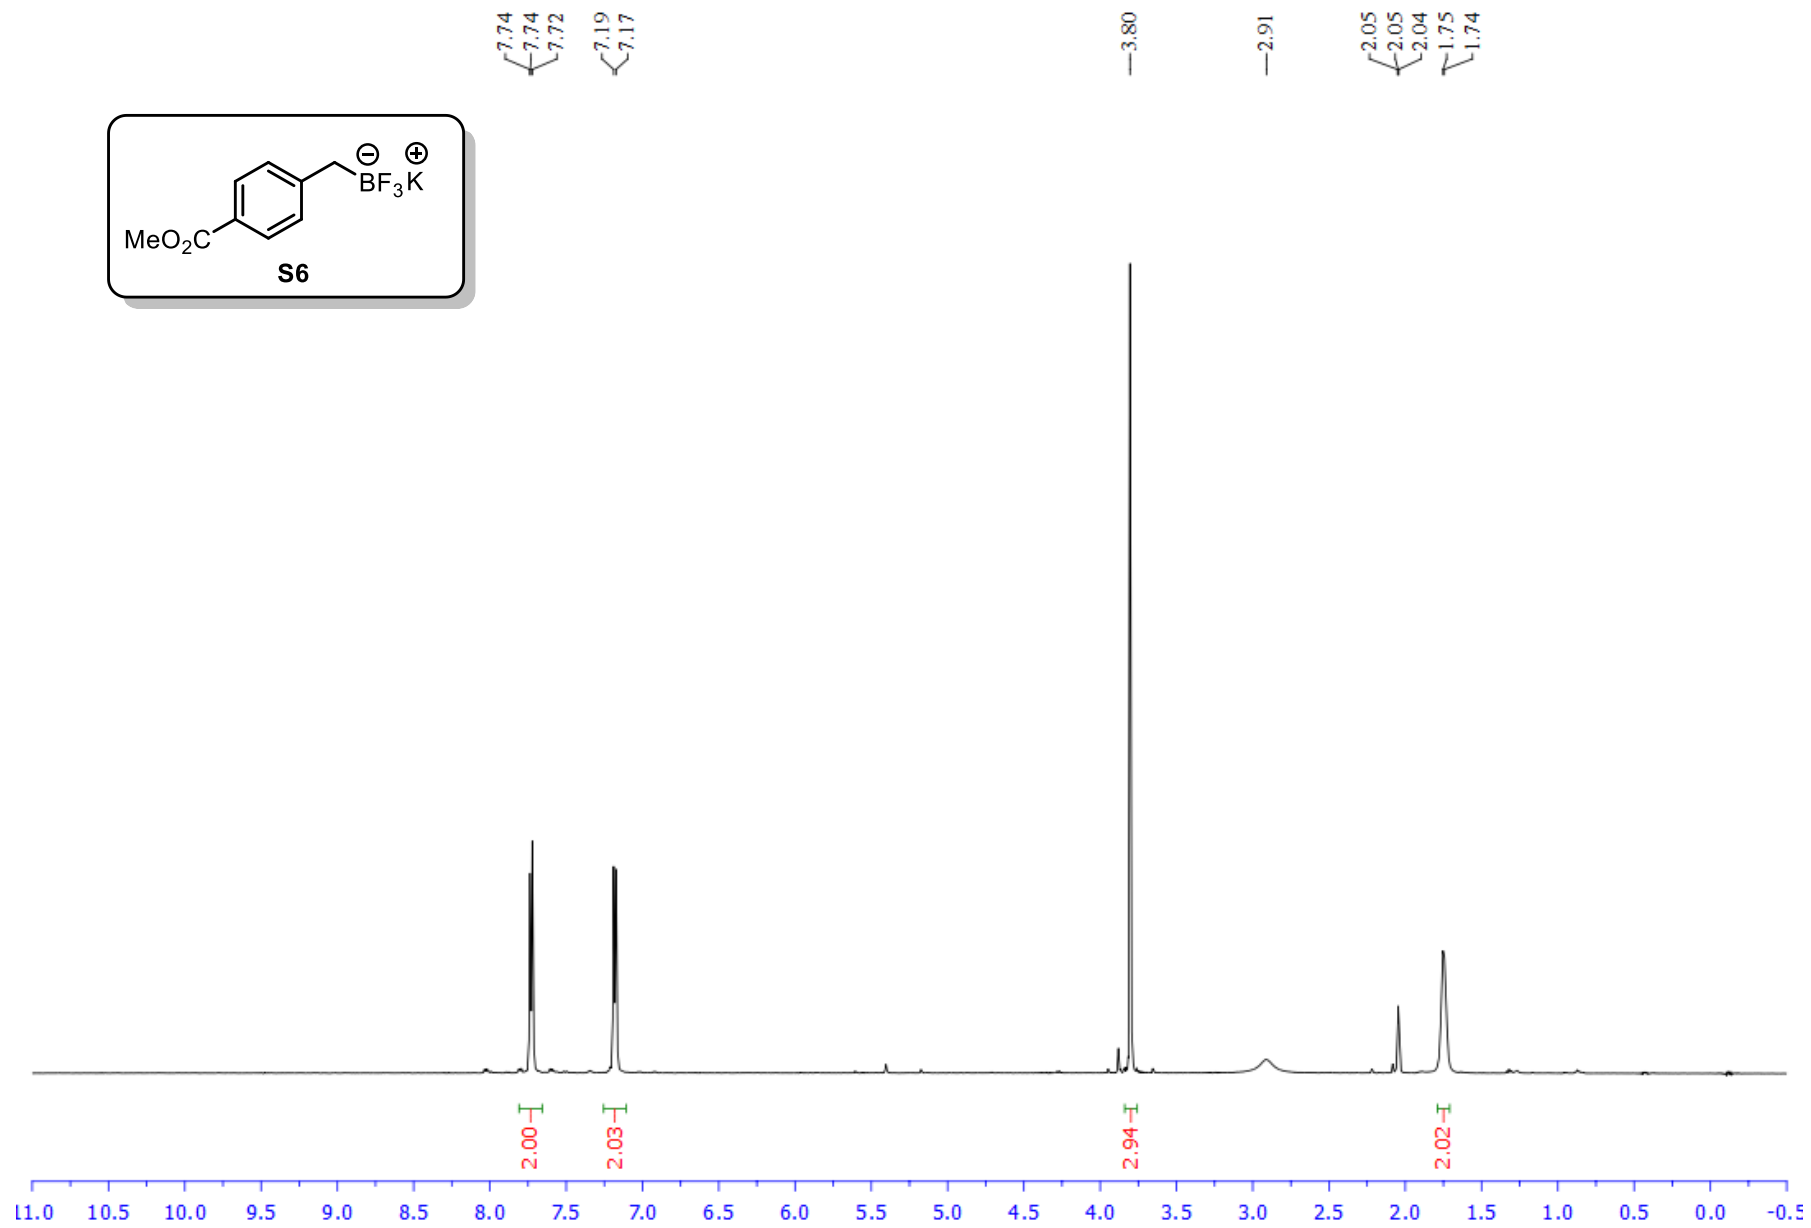

S99

$^{13}\text{C}$  NMR (acetone- $d_6$ , 125.8 MHz) spectrum potassium trifluoro(4-(methoxycarbonyl)benzyl)borate (**S6**)

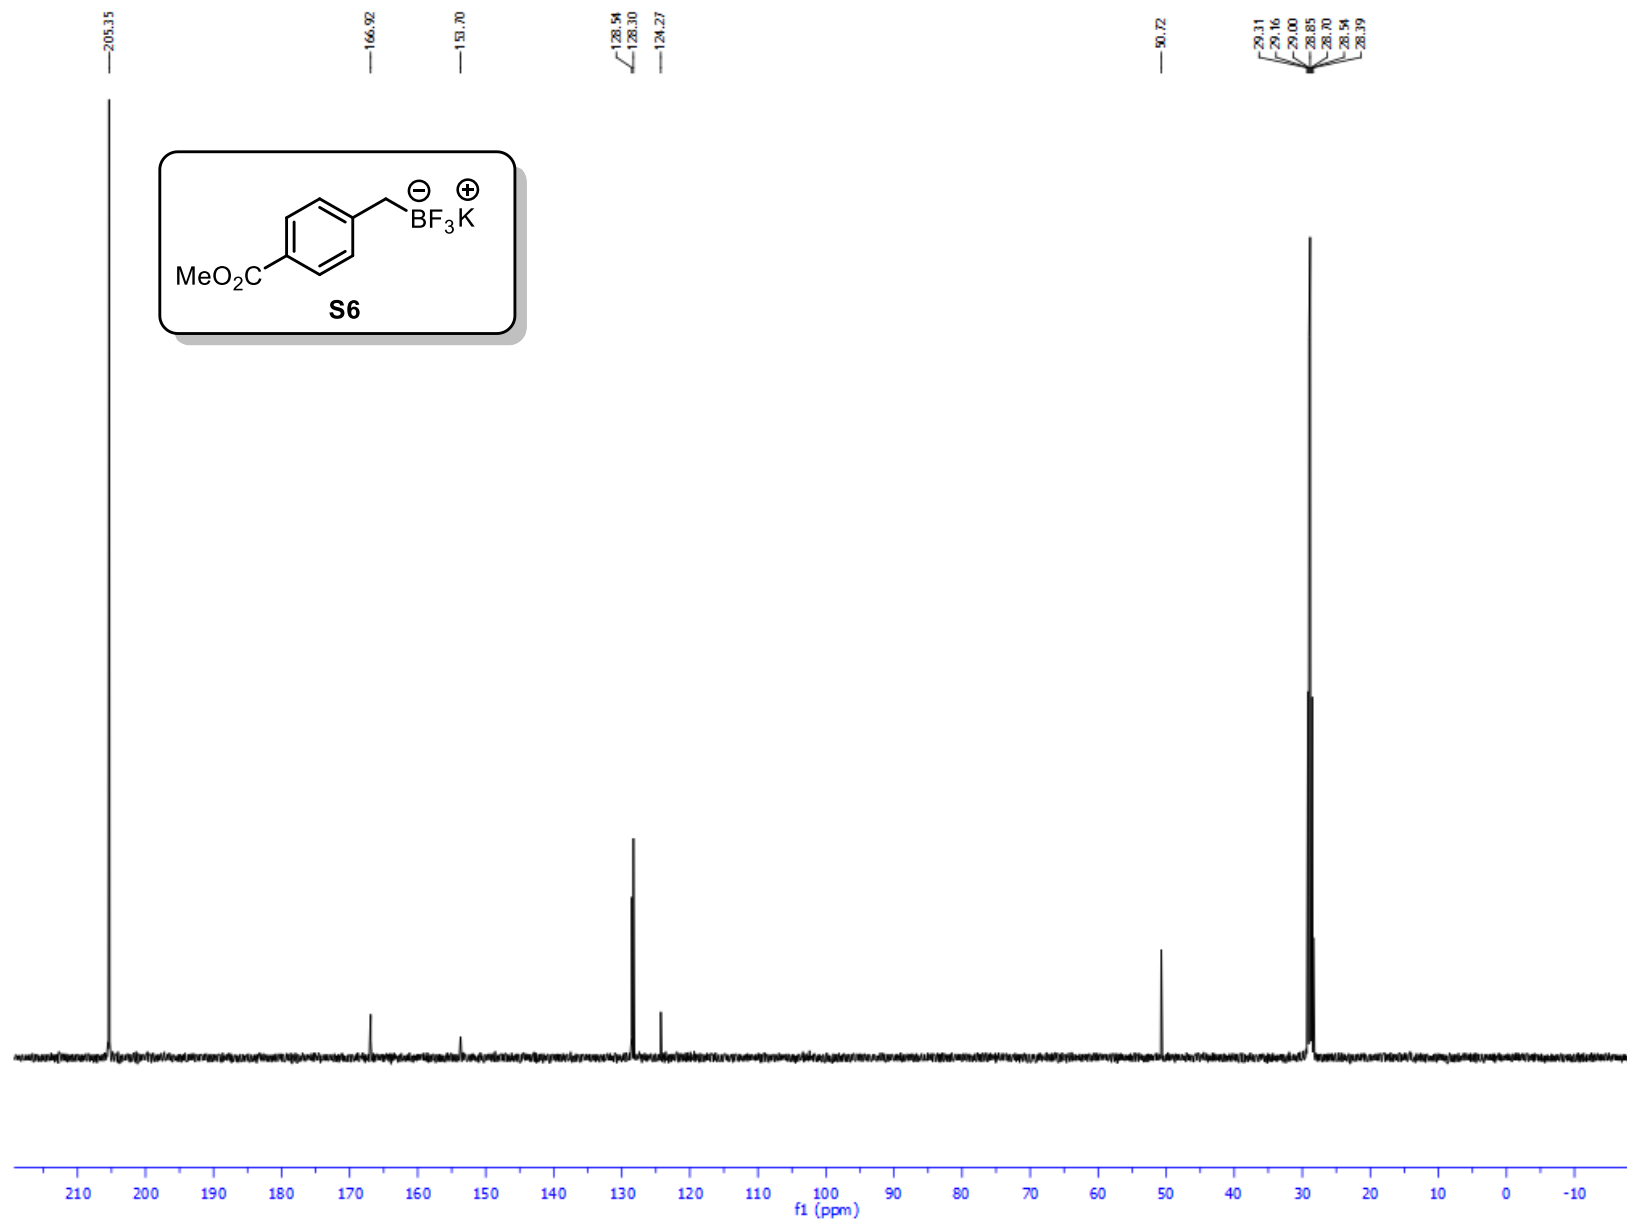

S100

$^{11}\text{B}$  NMR (acetone- $d_6$ , 128.4 MHz) spectrum potassium trifluoro(4-(methoxycarbonyl)benzyl)borate (**S6**)

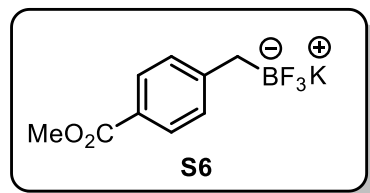

5.36  
4.93  
4.48  
4.03

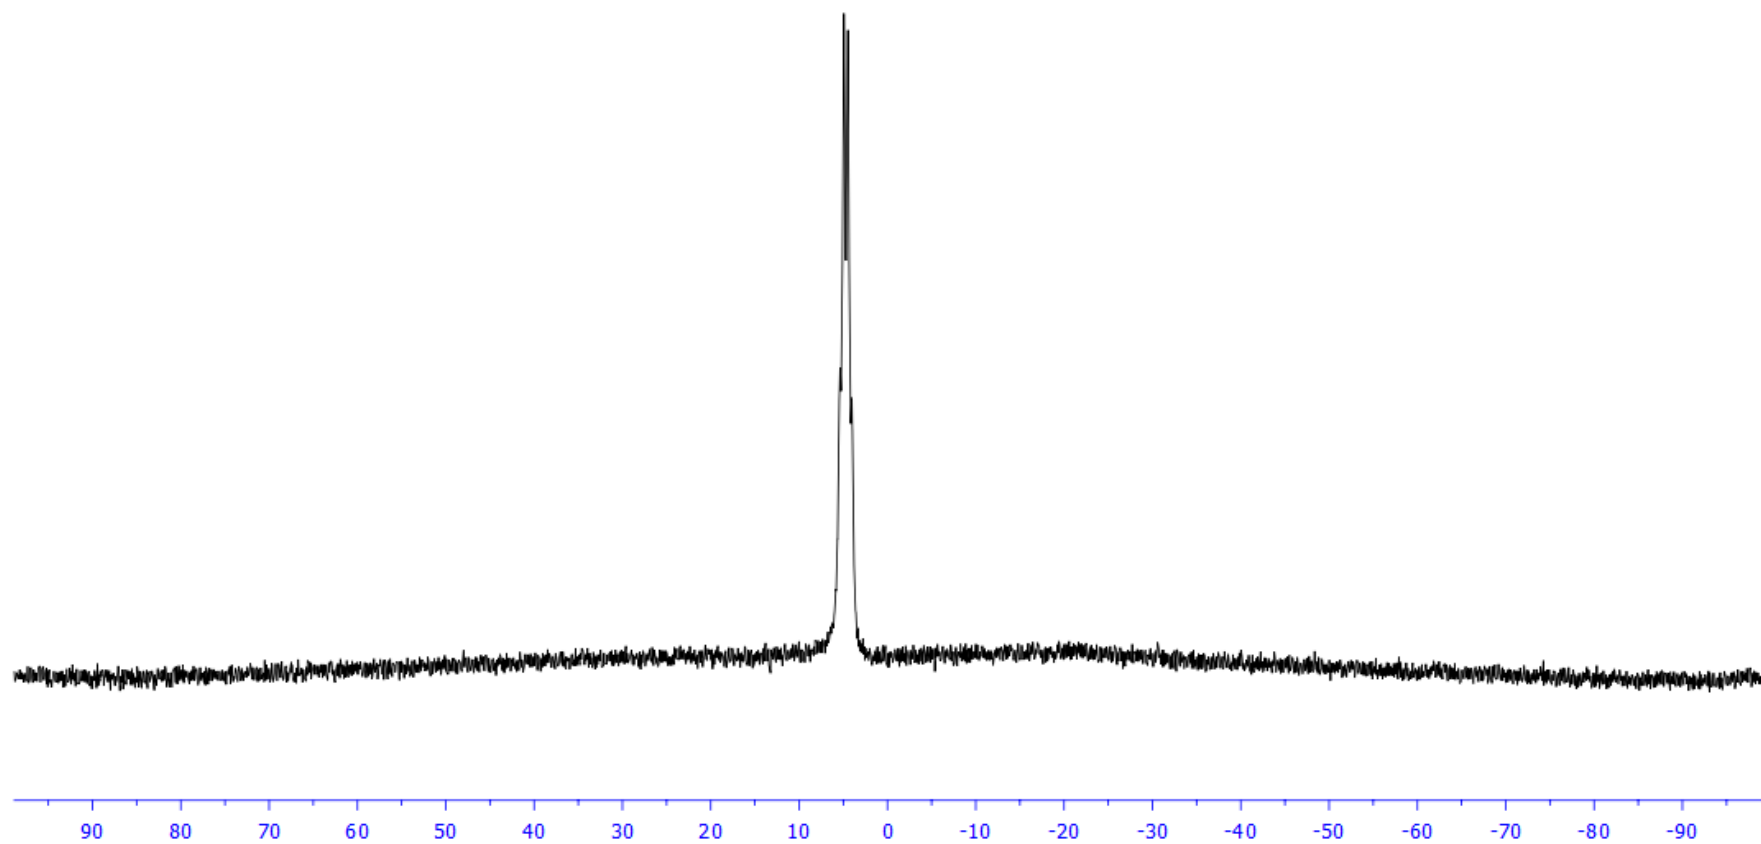

**S101**

$^{19}\text{F}$  NMR (acetone- $d_6$ , 470.8 MHz) spectrum potassium trifluoro(4-(methoxycarbonyl)benzyl)borate (**S6**)

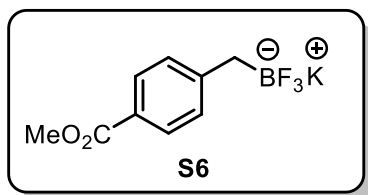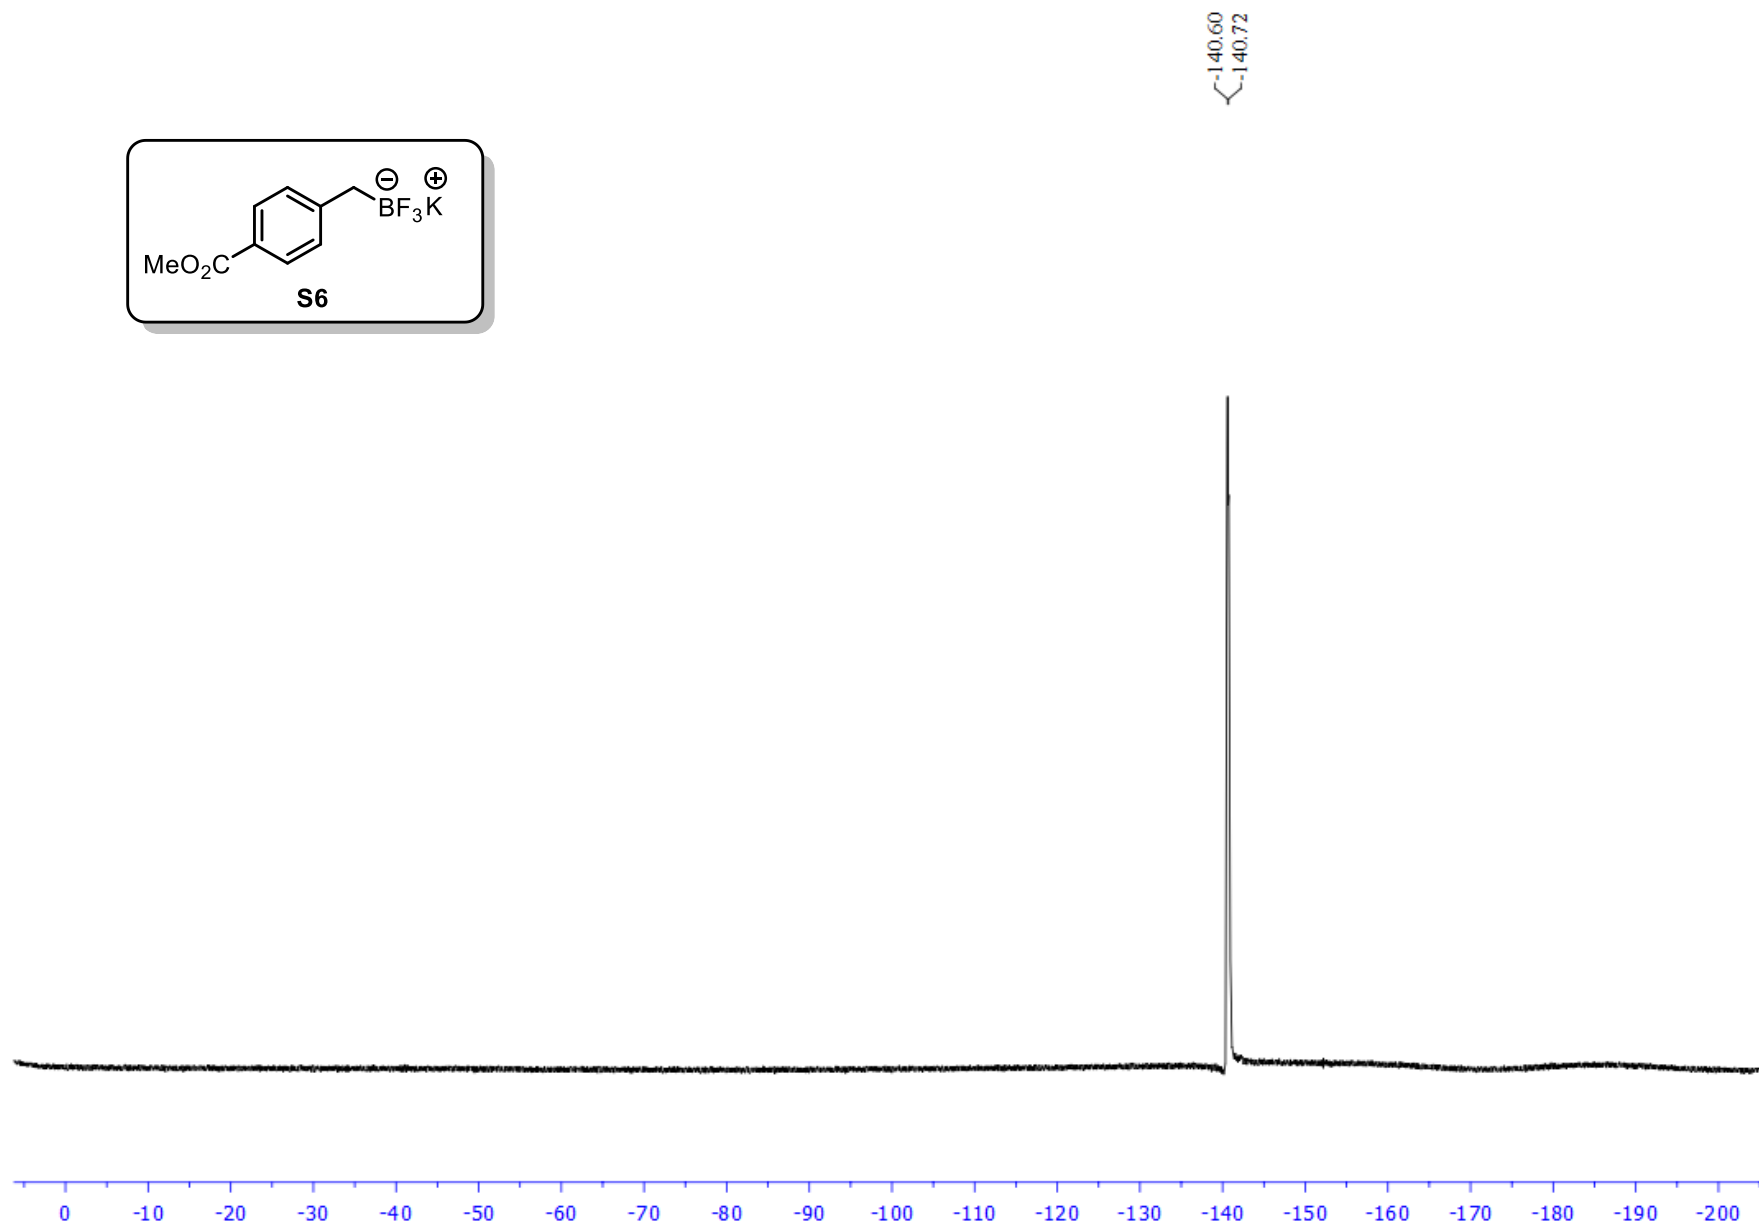

**S102**

$^1\text{H}$  NMR (acetone- $d_6$ , 500 MHz) spectrum of potassium trifluoro(2-methylbenzyl)borate (**S7**)

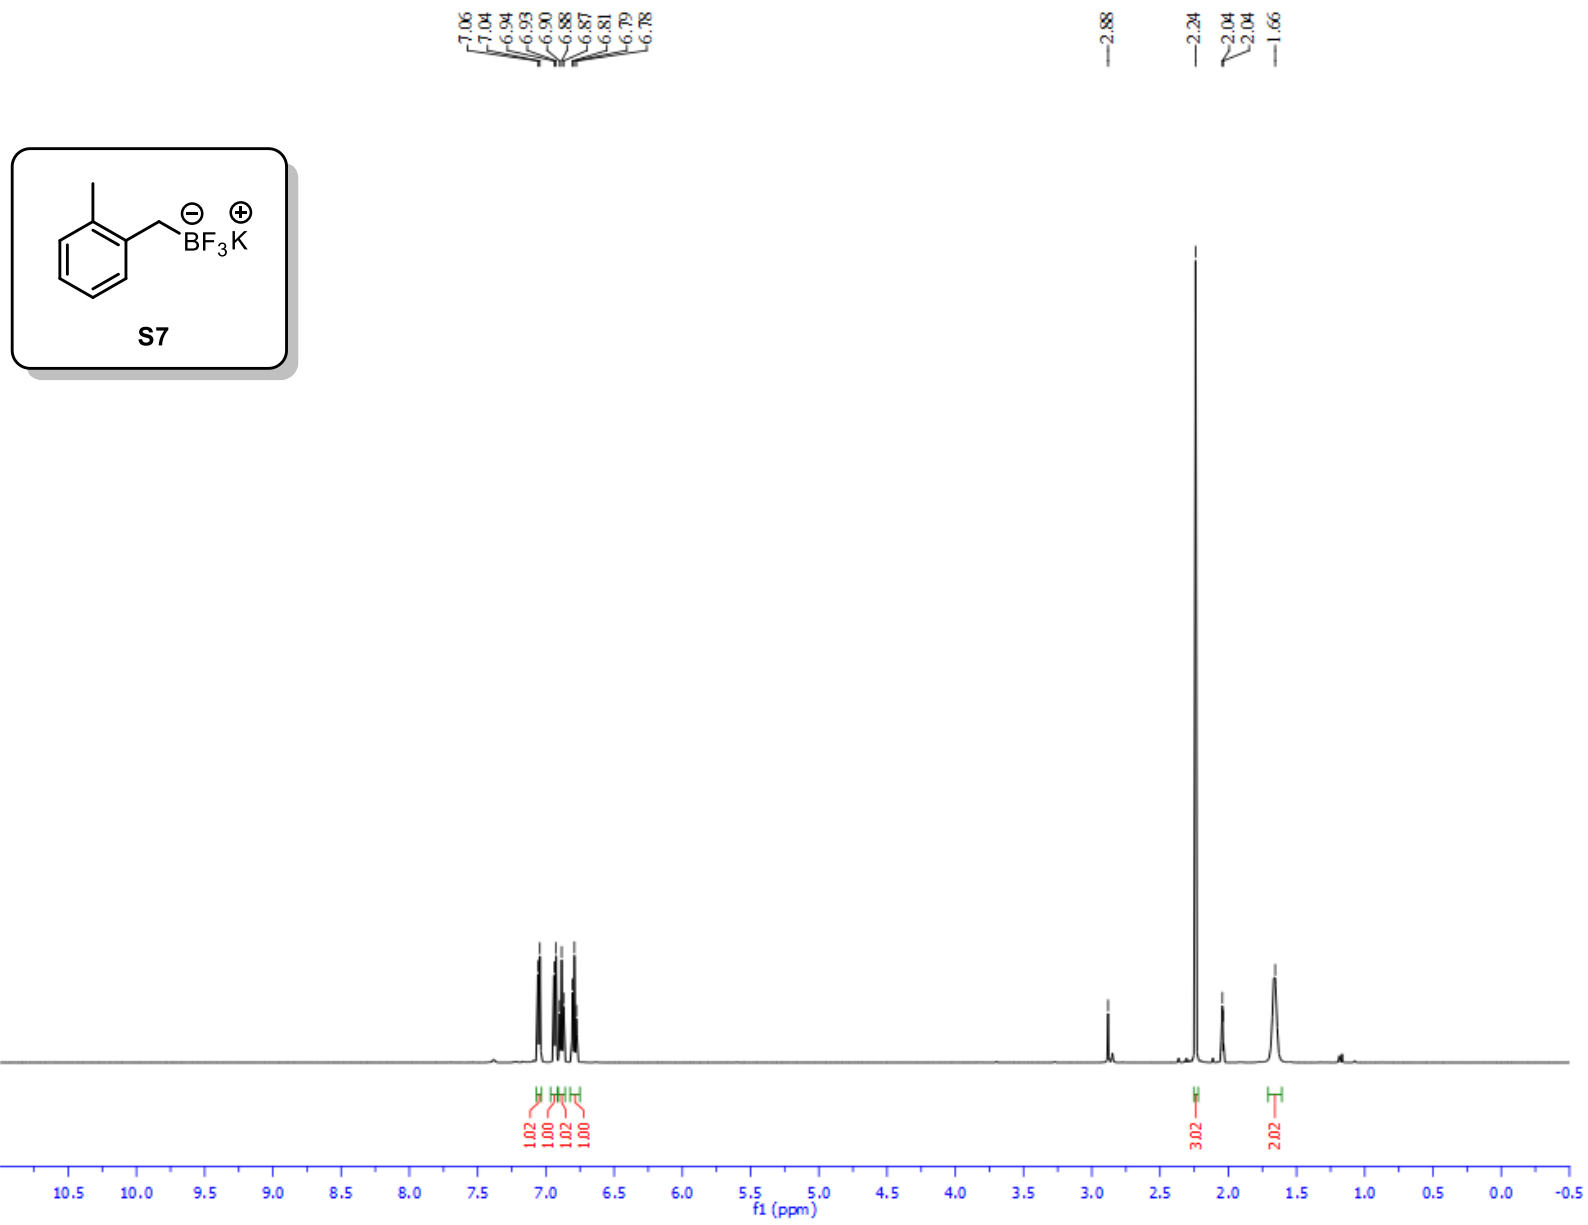

**S103**



$^{13}\text{C}$  NMR (acetone- $d_6$ , 125.8 MHz) spectrum of potassium trifluoro(2-methylbenzyl)borate (**S7**)

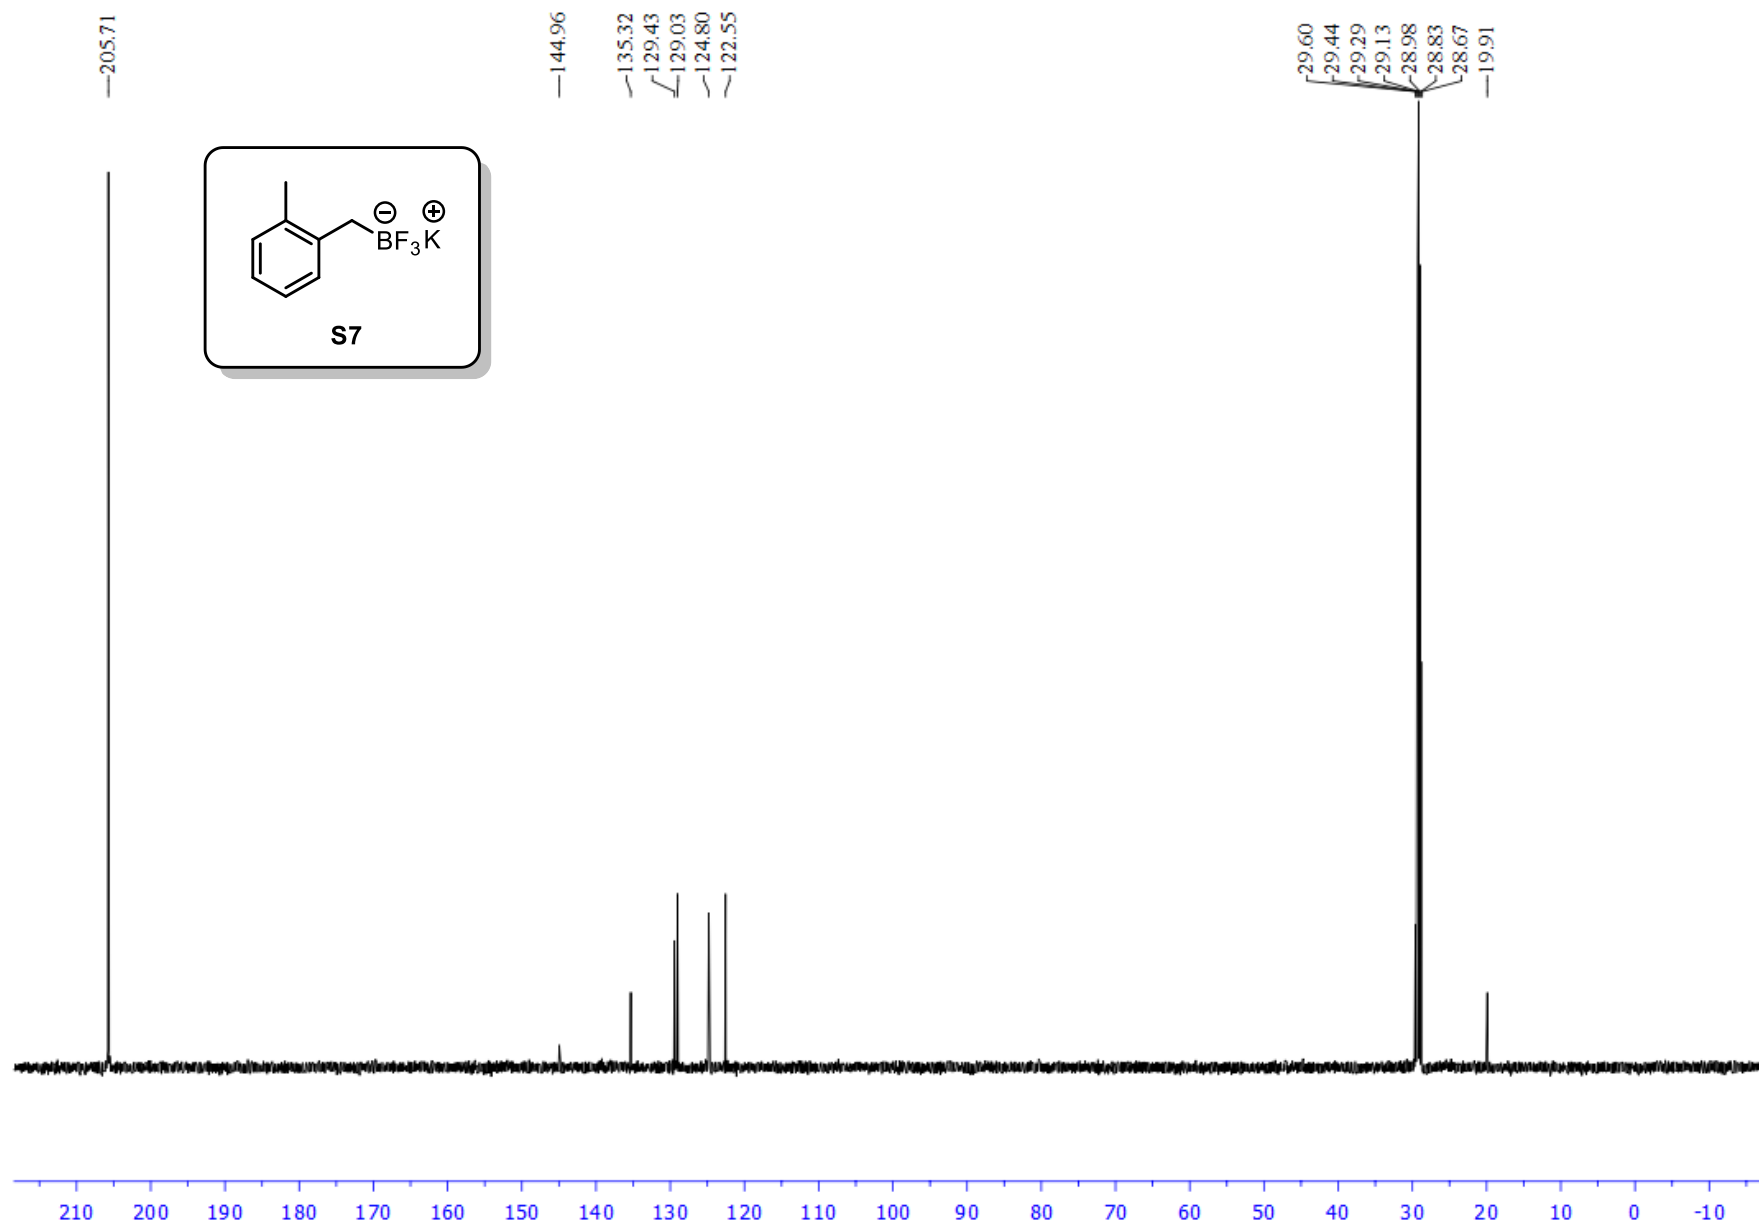

S104

$^{11}\text{B}$  NMR (acetone- $d_6$ , 128.4 MHz) spectrum of potassium trifluoro(2-methylbenzyl)borate (**S7**)

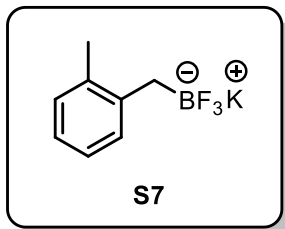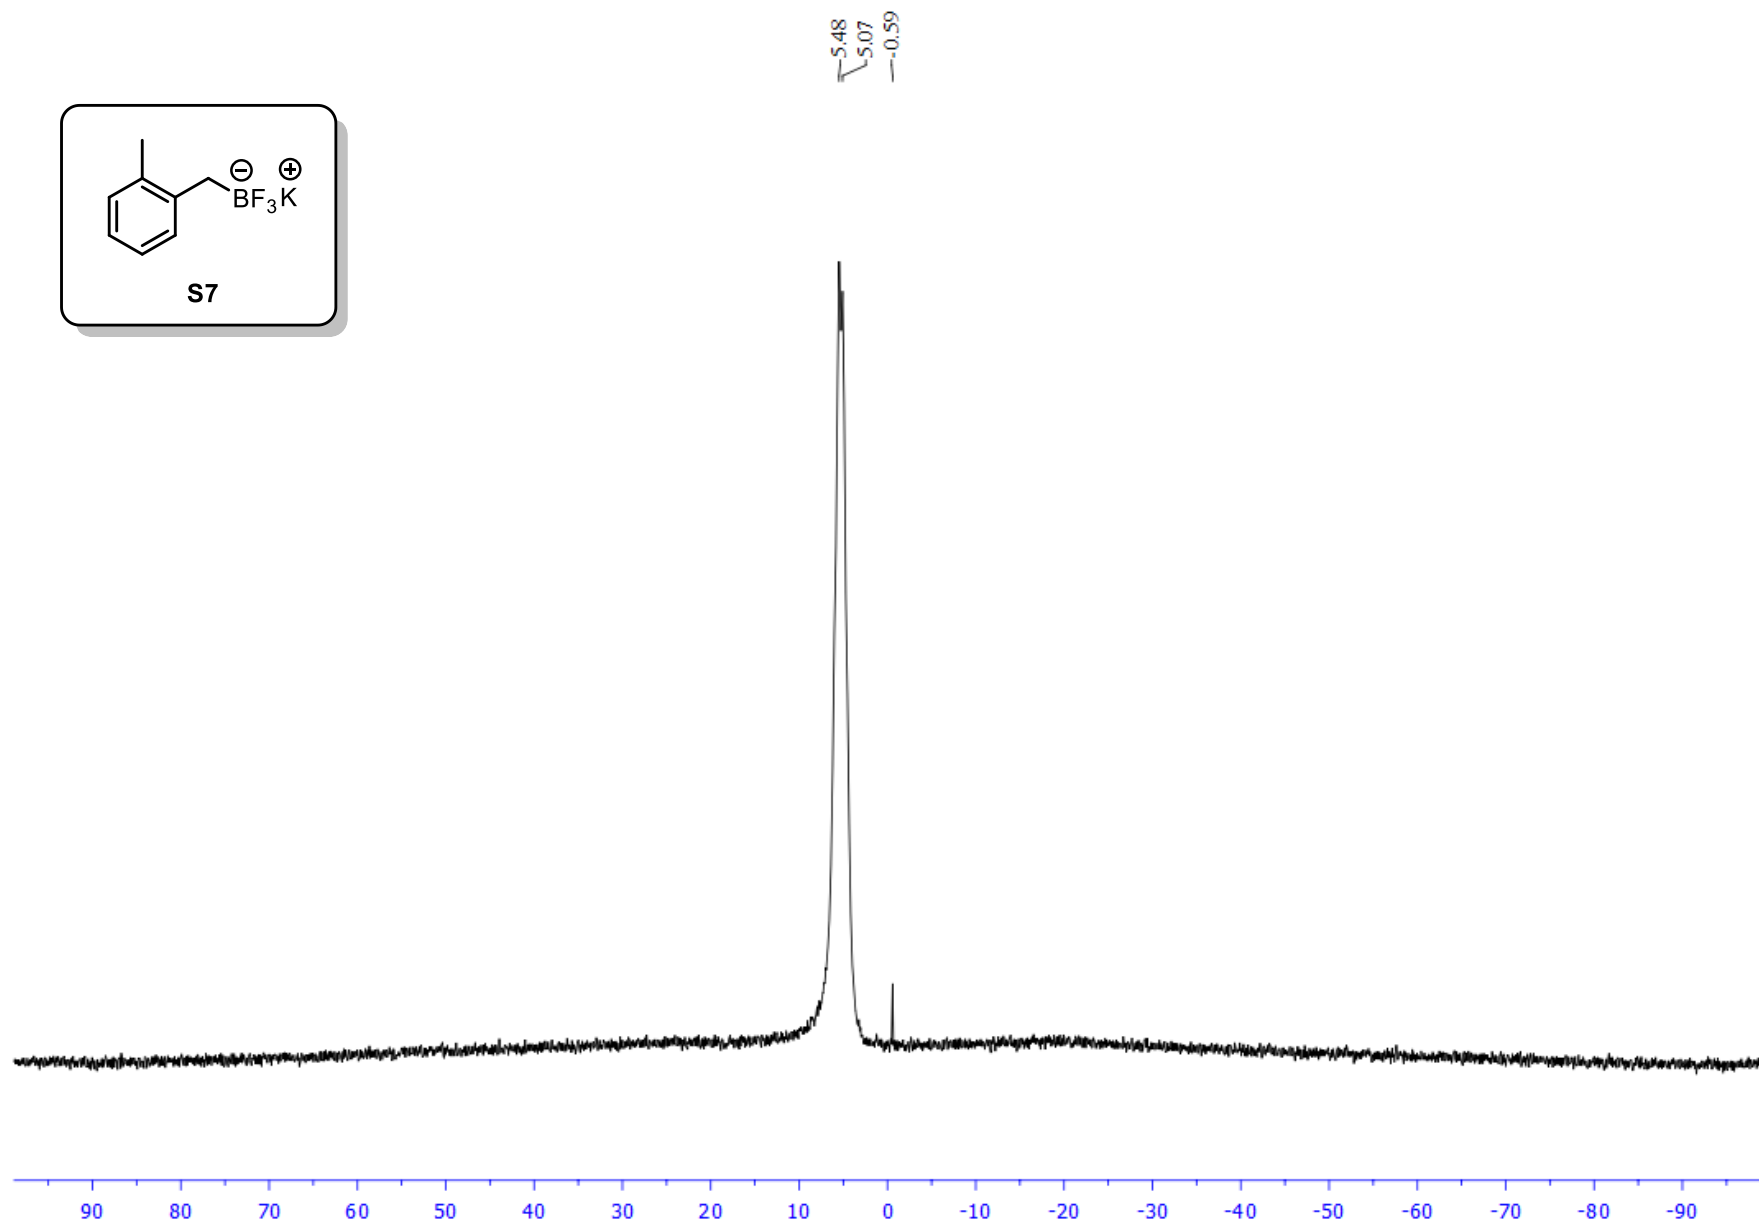

S105

$^{19}\text{F}$  NMR (acetone- $d_6$ , 470.8 MHz) spectrum of potassium trifluoro(2-methylbenzyl)borate (**S7**)

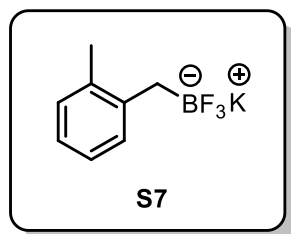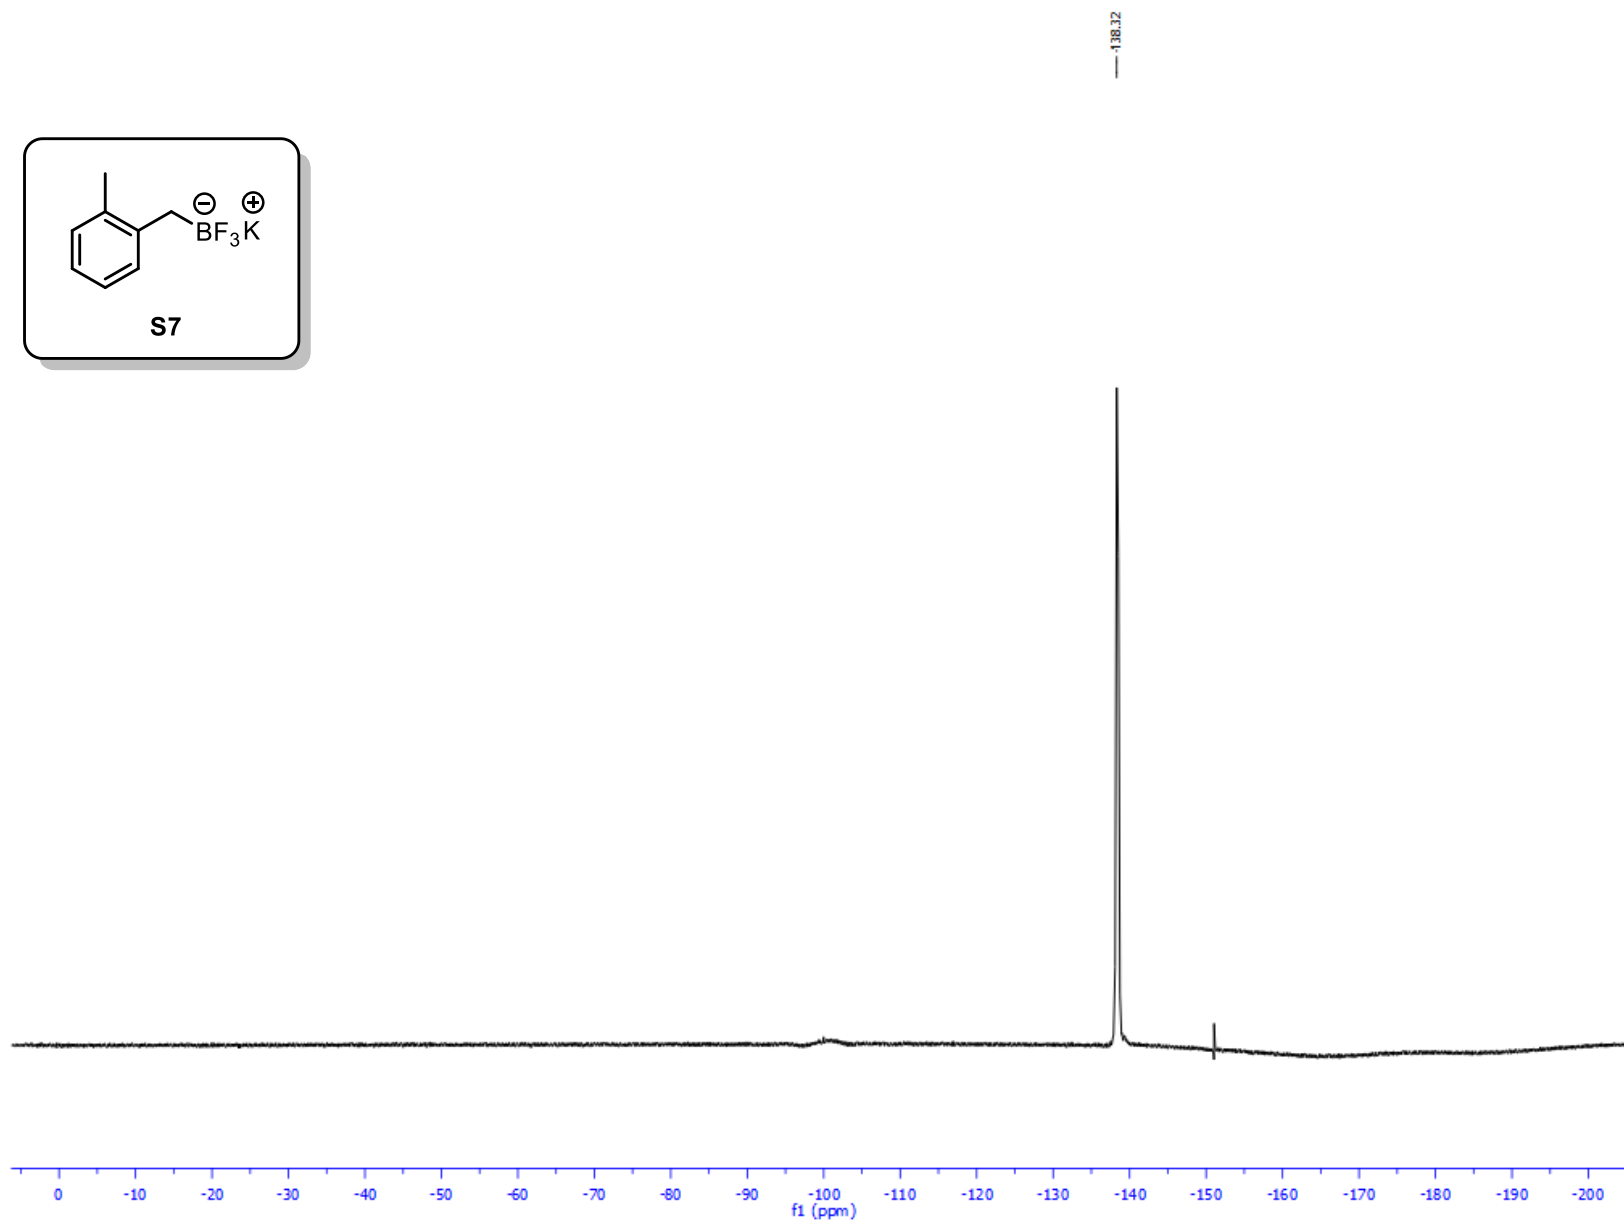

**S106**

$^1\text{H}$  NMR (acetone- $d_6$ , 500 MHz) spectrum of potassium (2,4-difluorobenzyl)trifluoroborate (**S8**)

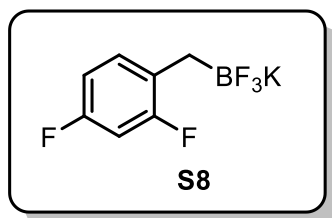

7.23  
7.21  
7.20  
6.69  
6.68  
6.66  
6.65

-1.58

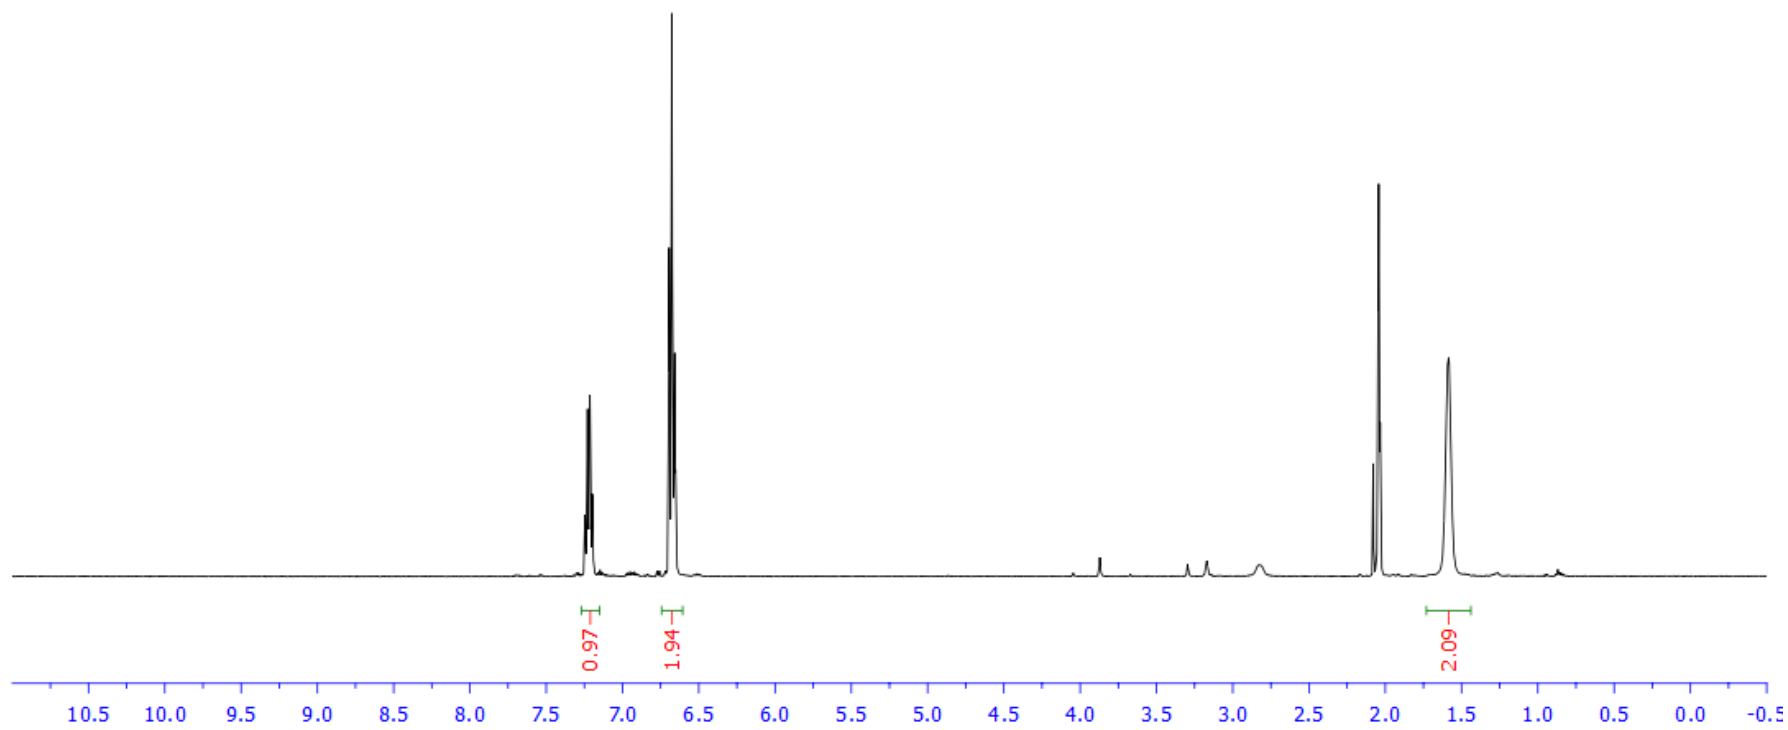

**S107**

$^{13}\text{C}$  NMR (acetone- $d_6$ , 125.8 MHz) spectrum of potassium (2,4-difluorobenzyl)trifluoroborate (**S8**)

161.30  
161.21  
160.26  
160.17  
159.38  
159.29  
158.35  
158.26  
131.79  
131.73  
131.66  
128.03  
127.89  
109.79  
109.76  
109.63  
109.60  
102.24  
102.05  
102.02  
101.82

18.50

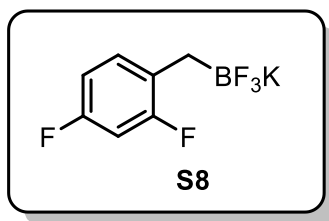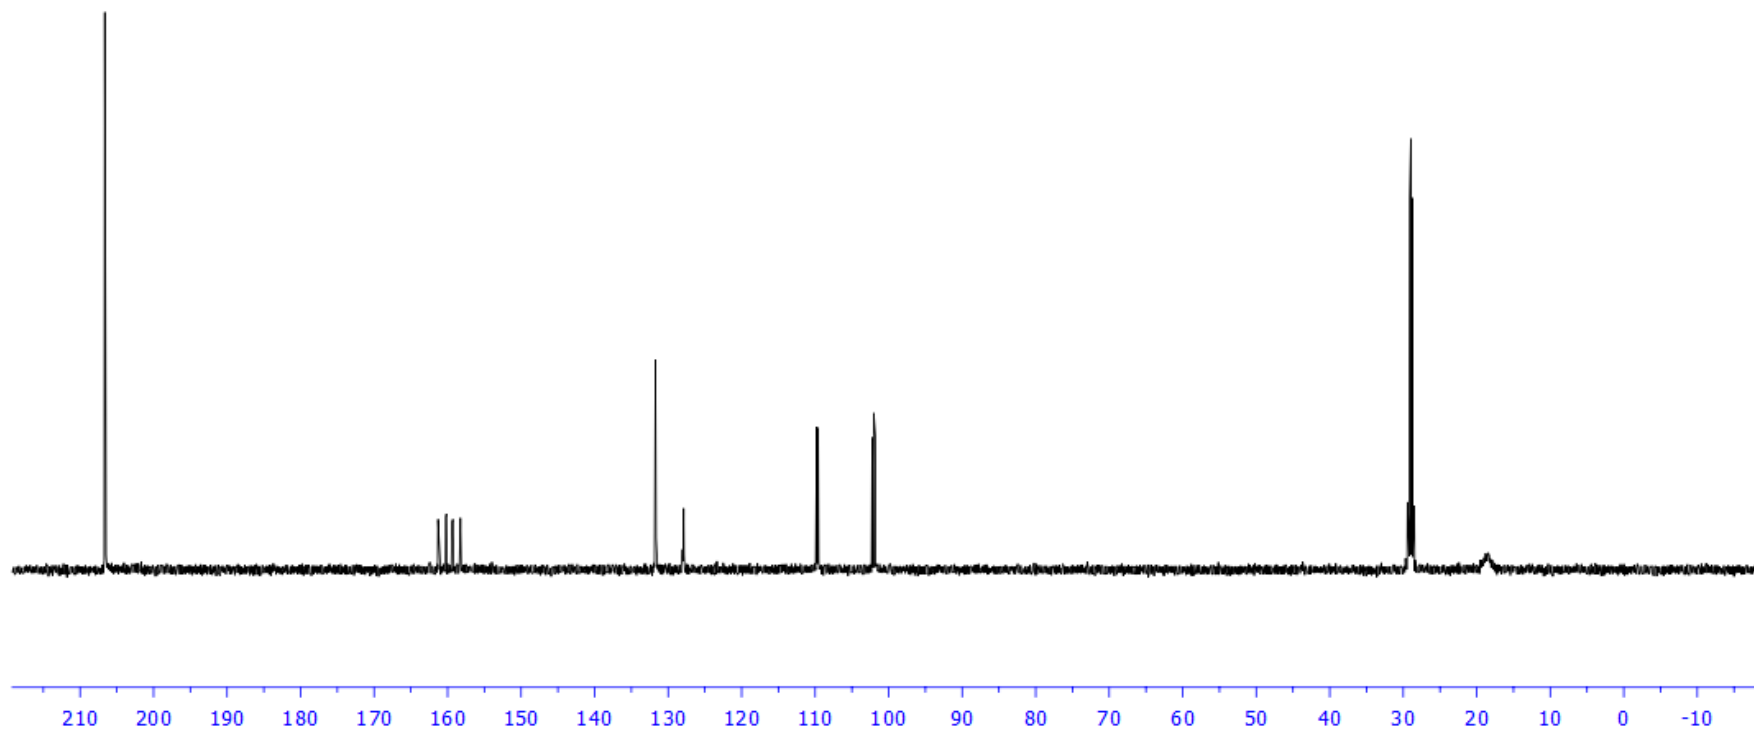

S108

$^{19}\text{F}$  NMR (acetone- $\text{d}_6$ , 470.8 MHz) spectrum of potassium (2,4-difluorobenzyl)trifluoroborate (**S8**)

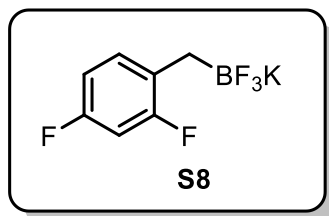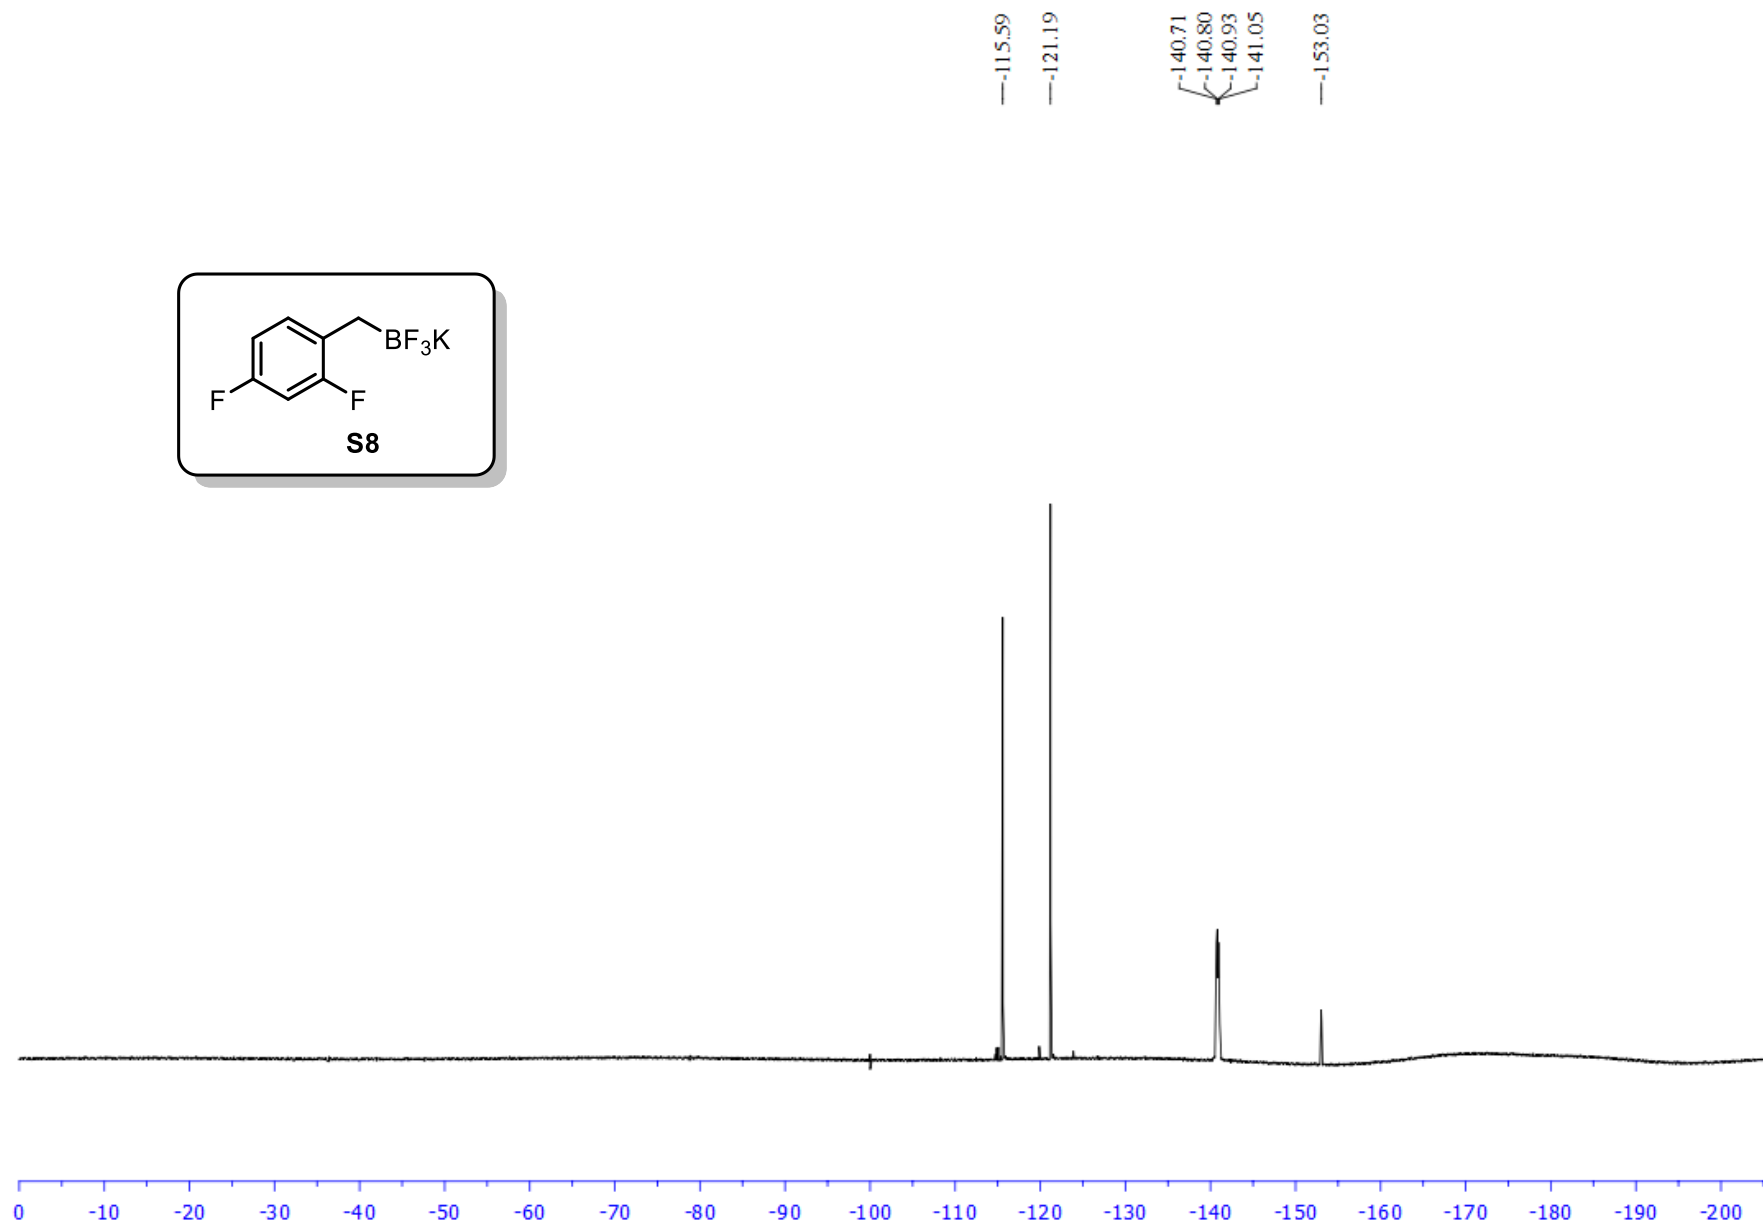

S109

$^{11}\text{B}$  NMR (acetone- $d_6$ , 128.4 MHz) spectrum of potassium (2,4-difluorobenzyl)trifluoroborate (**S8**)

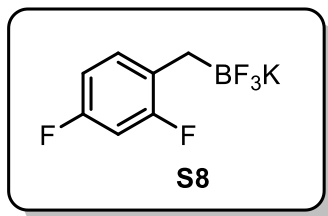

2.63  
2.17

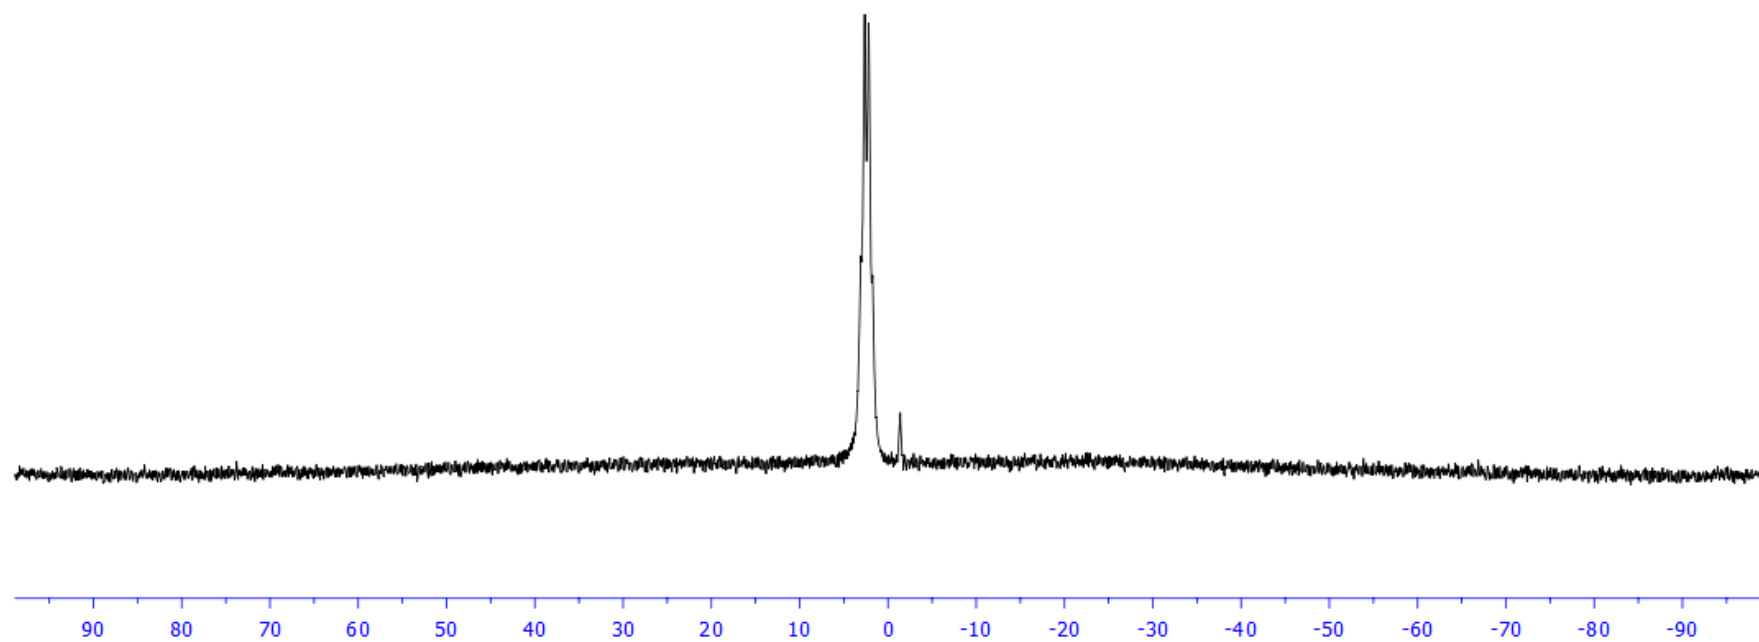

S110

$^1\text{H}$  NMR (acetone- $d_6$ , 500 MHz) spectrum of potassium trifluoro(naphthalen-2-ylmethyl)borate (**S9**)

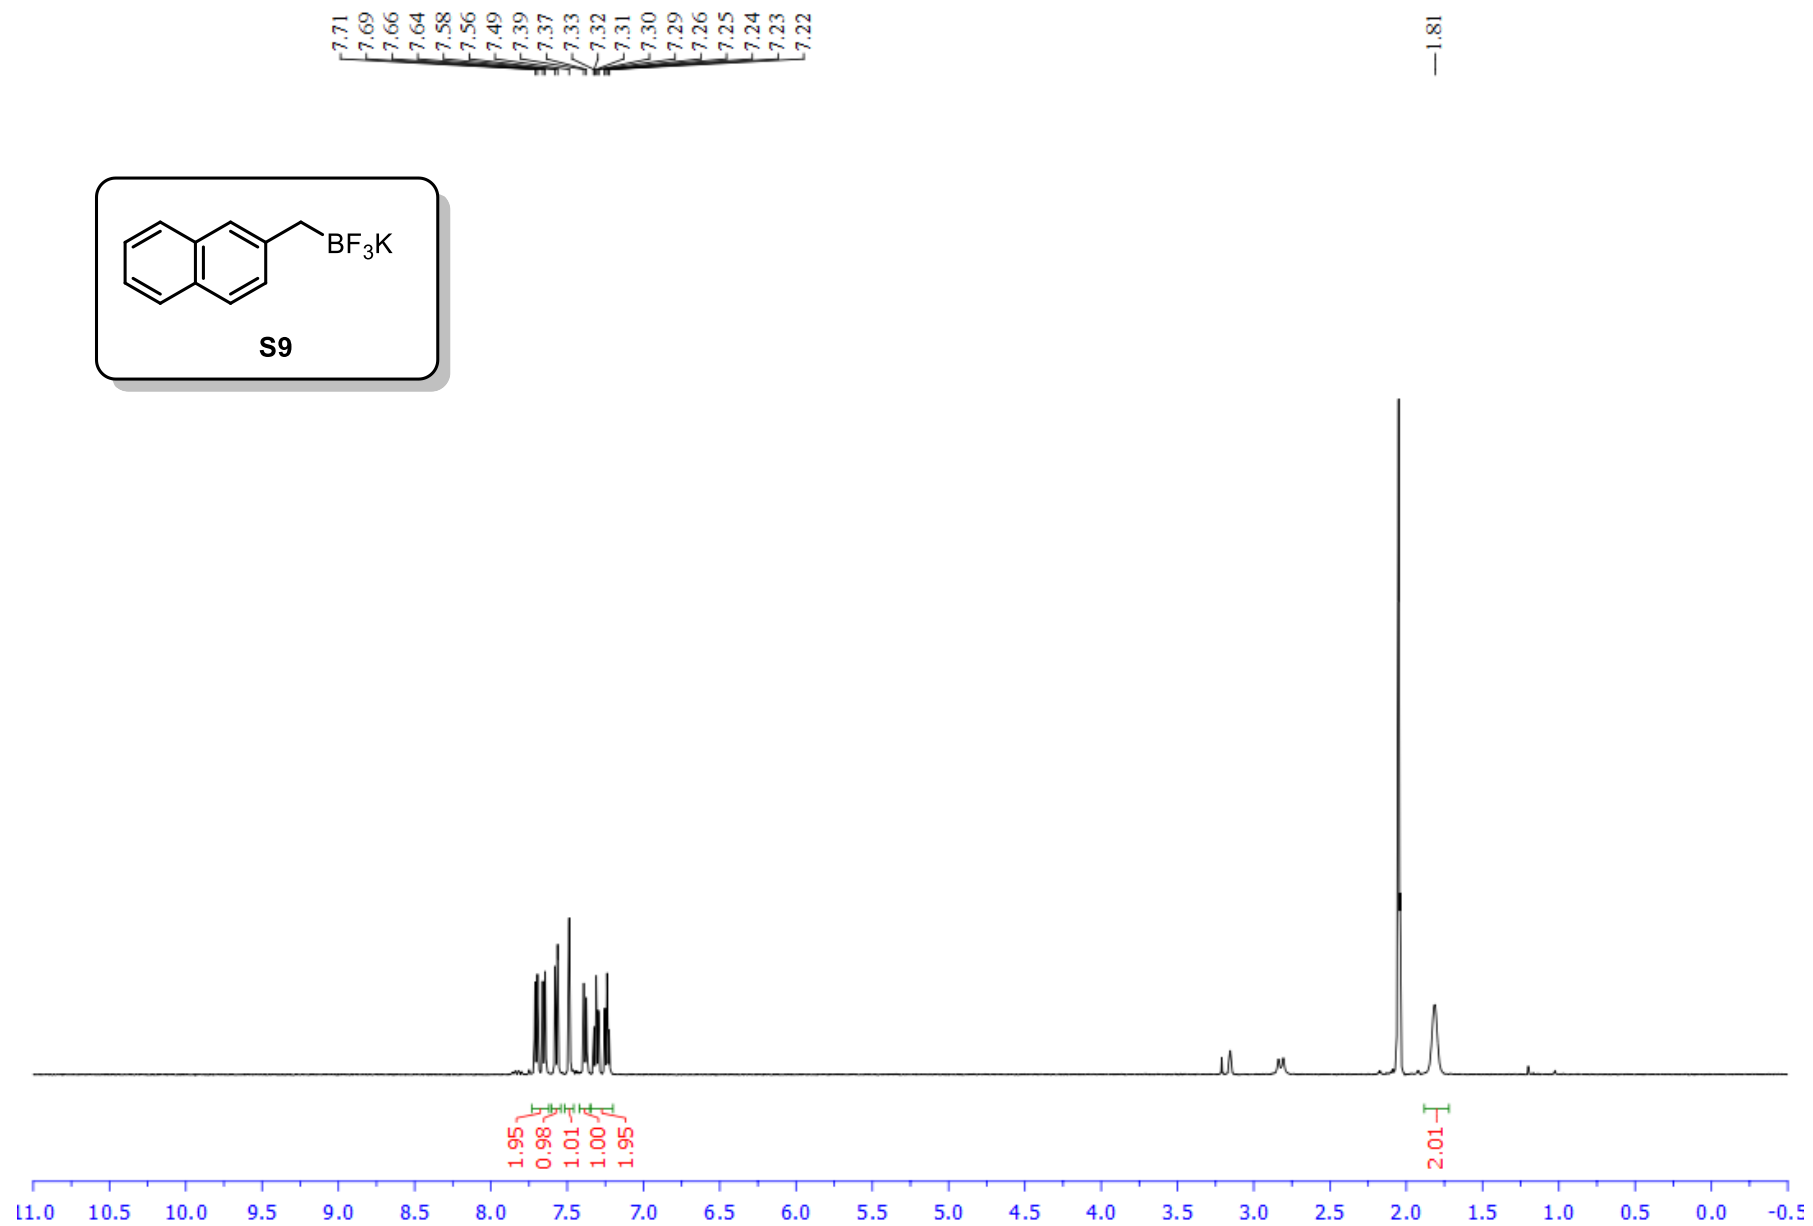

S111



$^{13}\text{C}$  NMR (acetone- $d_6$ , 125.8 MHz) spectrum of potassium trifluoro(naphthalen-2-ylmethyl)borate (**S9**)

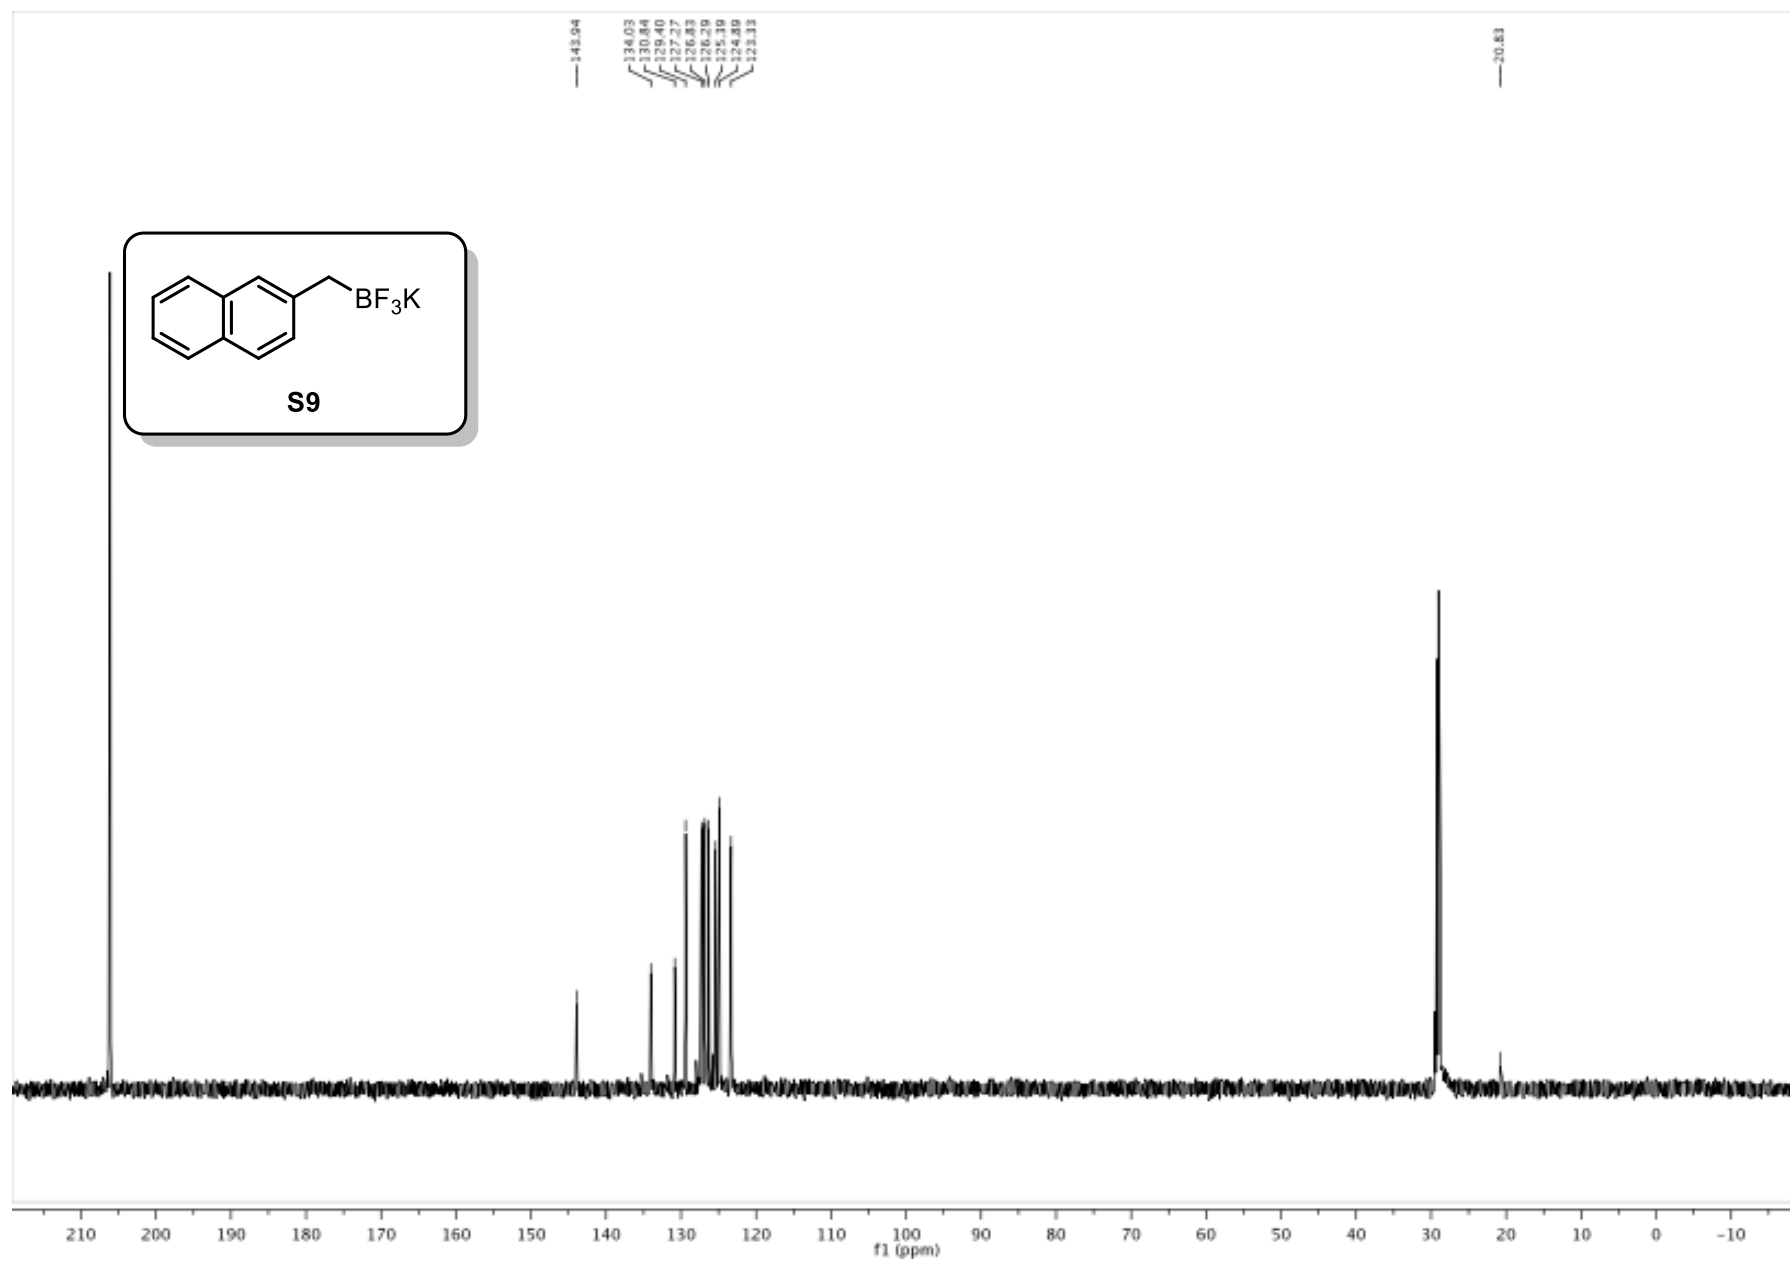

S112

$^{19}\text{F}$  NMR (acetone- $\text{d}_6$ , 470.8 MHz) spectrum of potassium trifluoro(naphthalen-2-ylmethyl)borate (**S9**)

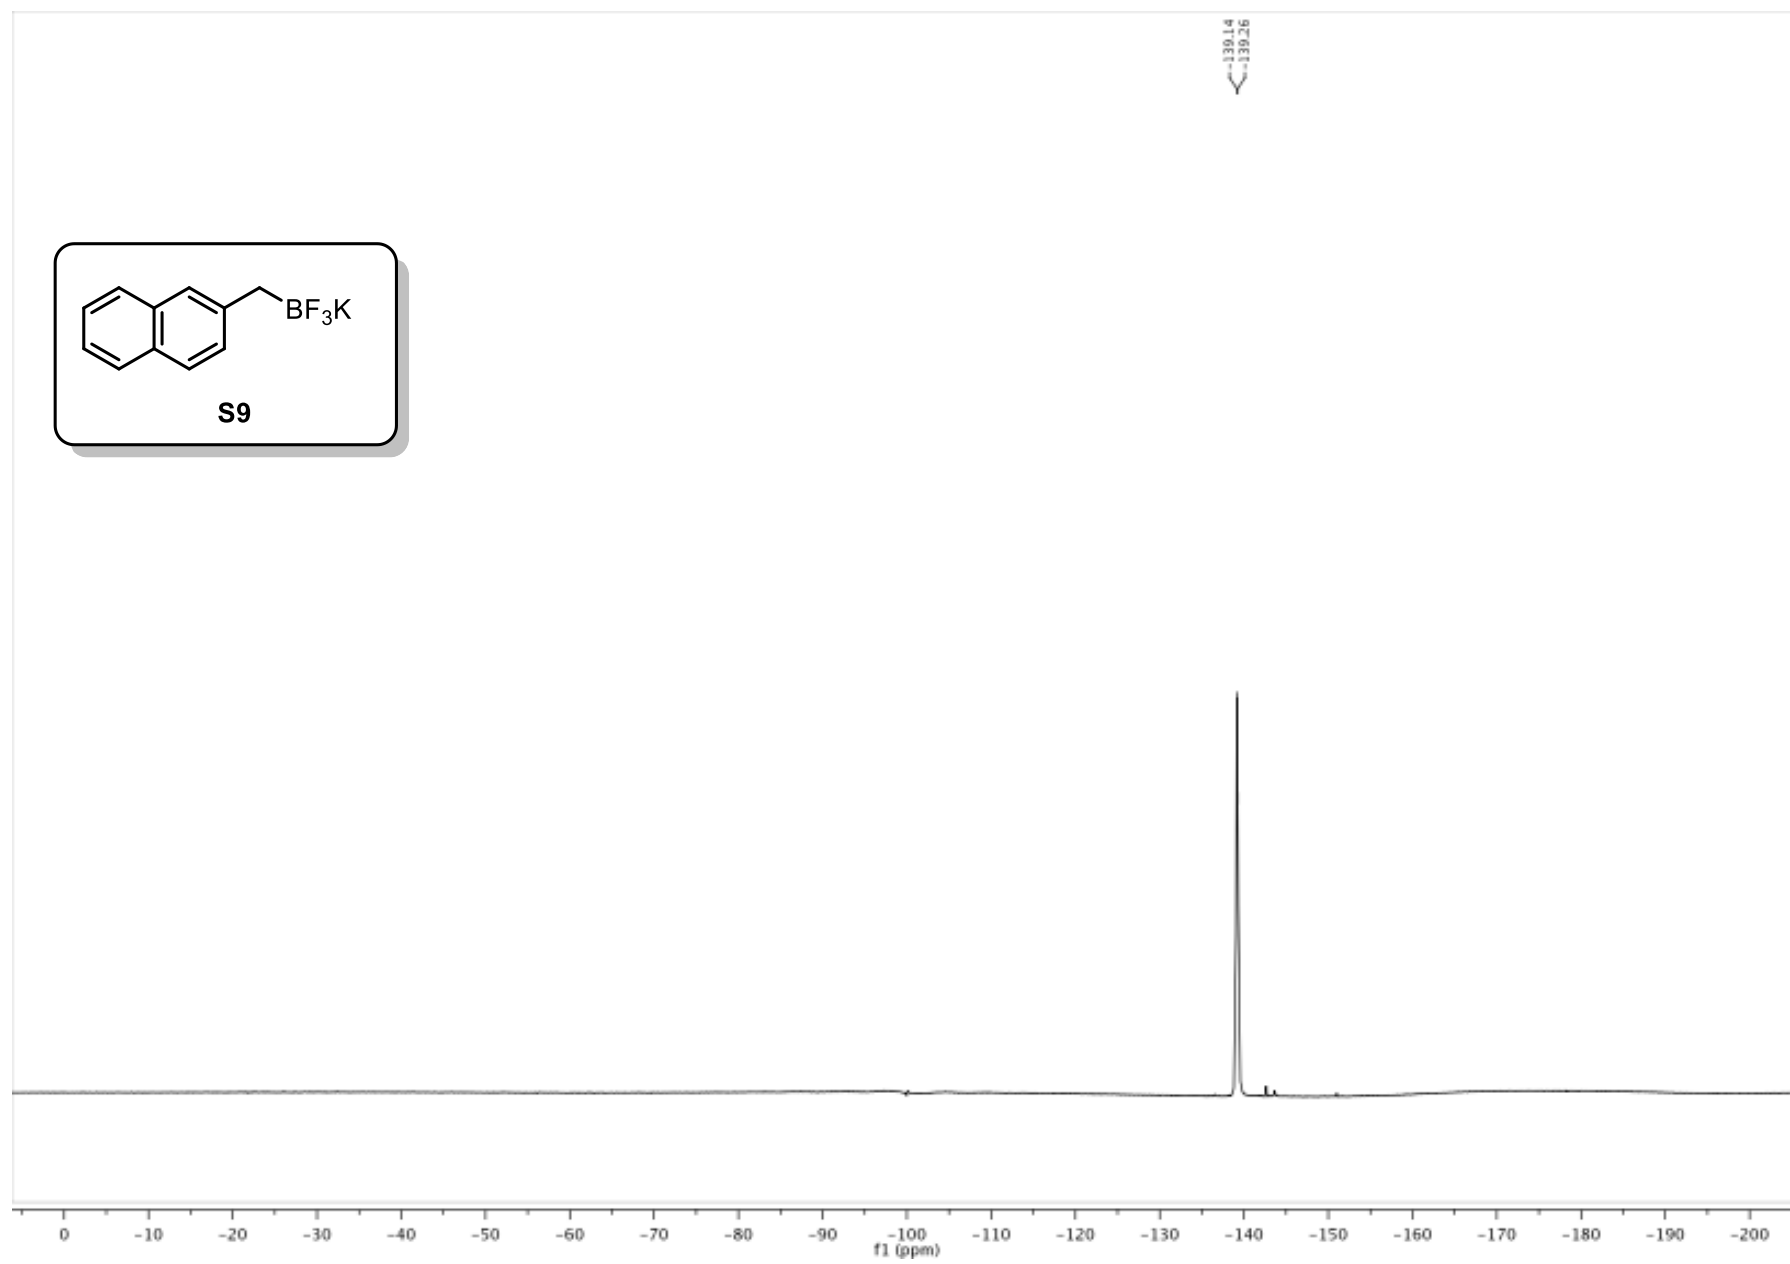

**S113**

$^{11}\text{B}$  NMR (acetone- $d_6$ , 128.4 MHz) spectrum of potassium trifluoro(naphthalen-2-ylmethyl)borate (**S9**)

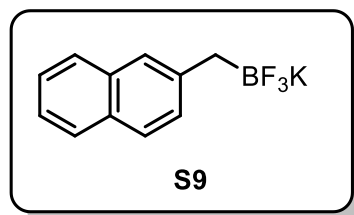

2.88  
2.41

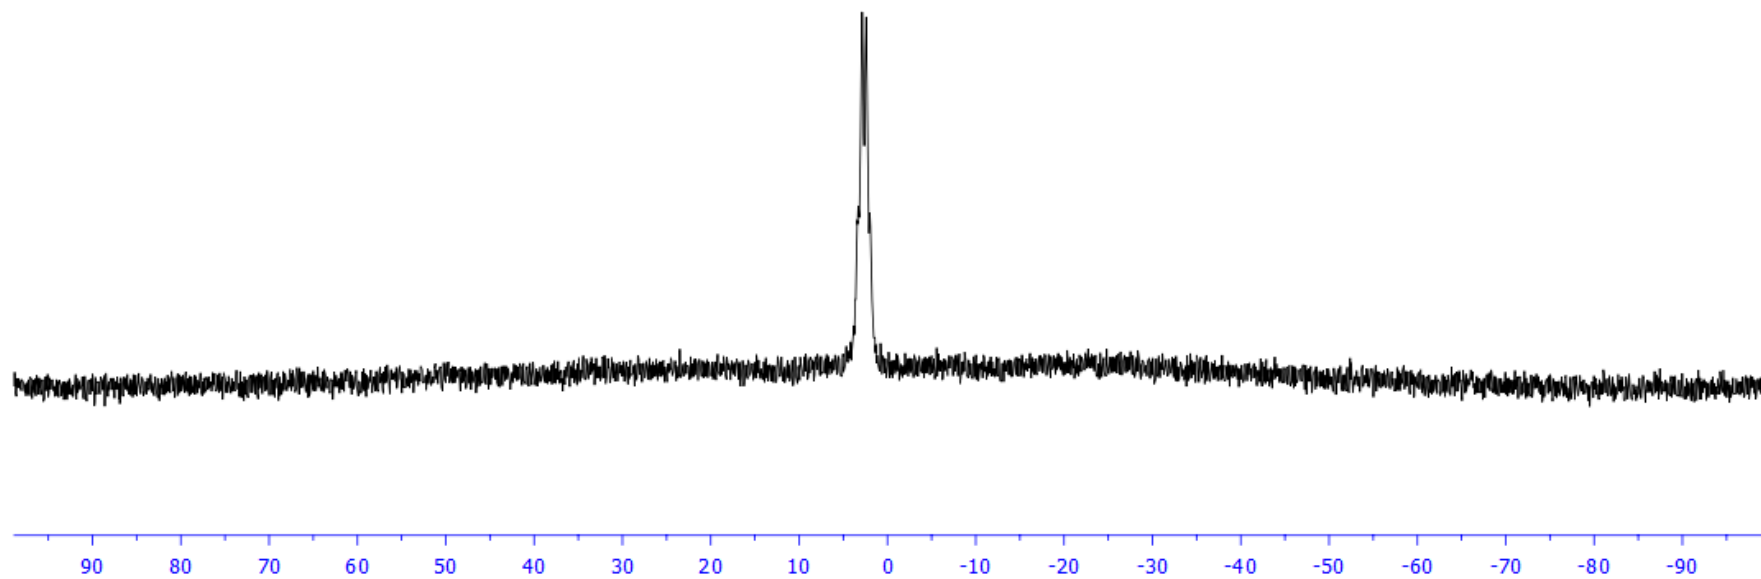

S114

$^1\text{H}$  NMR (DMSO- $d_6$ , 500 MHz) spectrum of potassium (3,5-dimethoxybenzyl)trifluoroborate (**S10**)

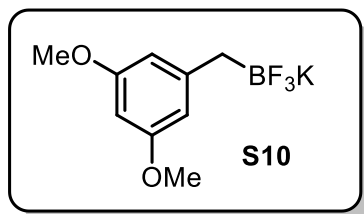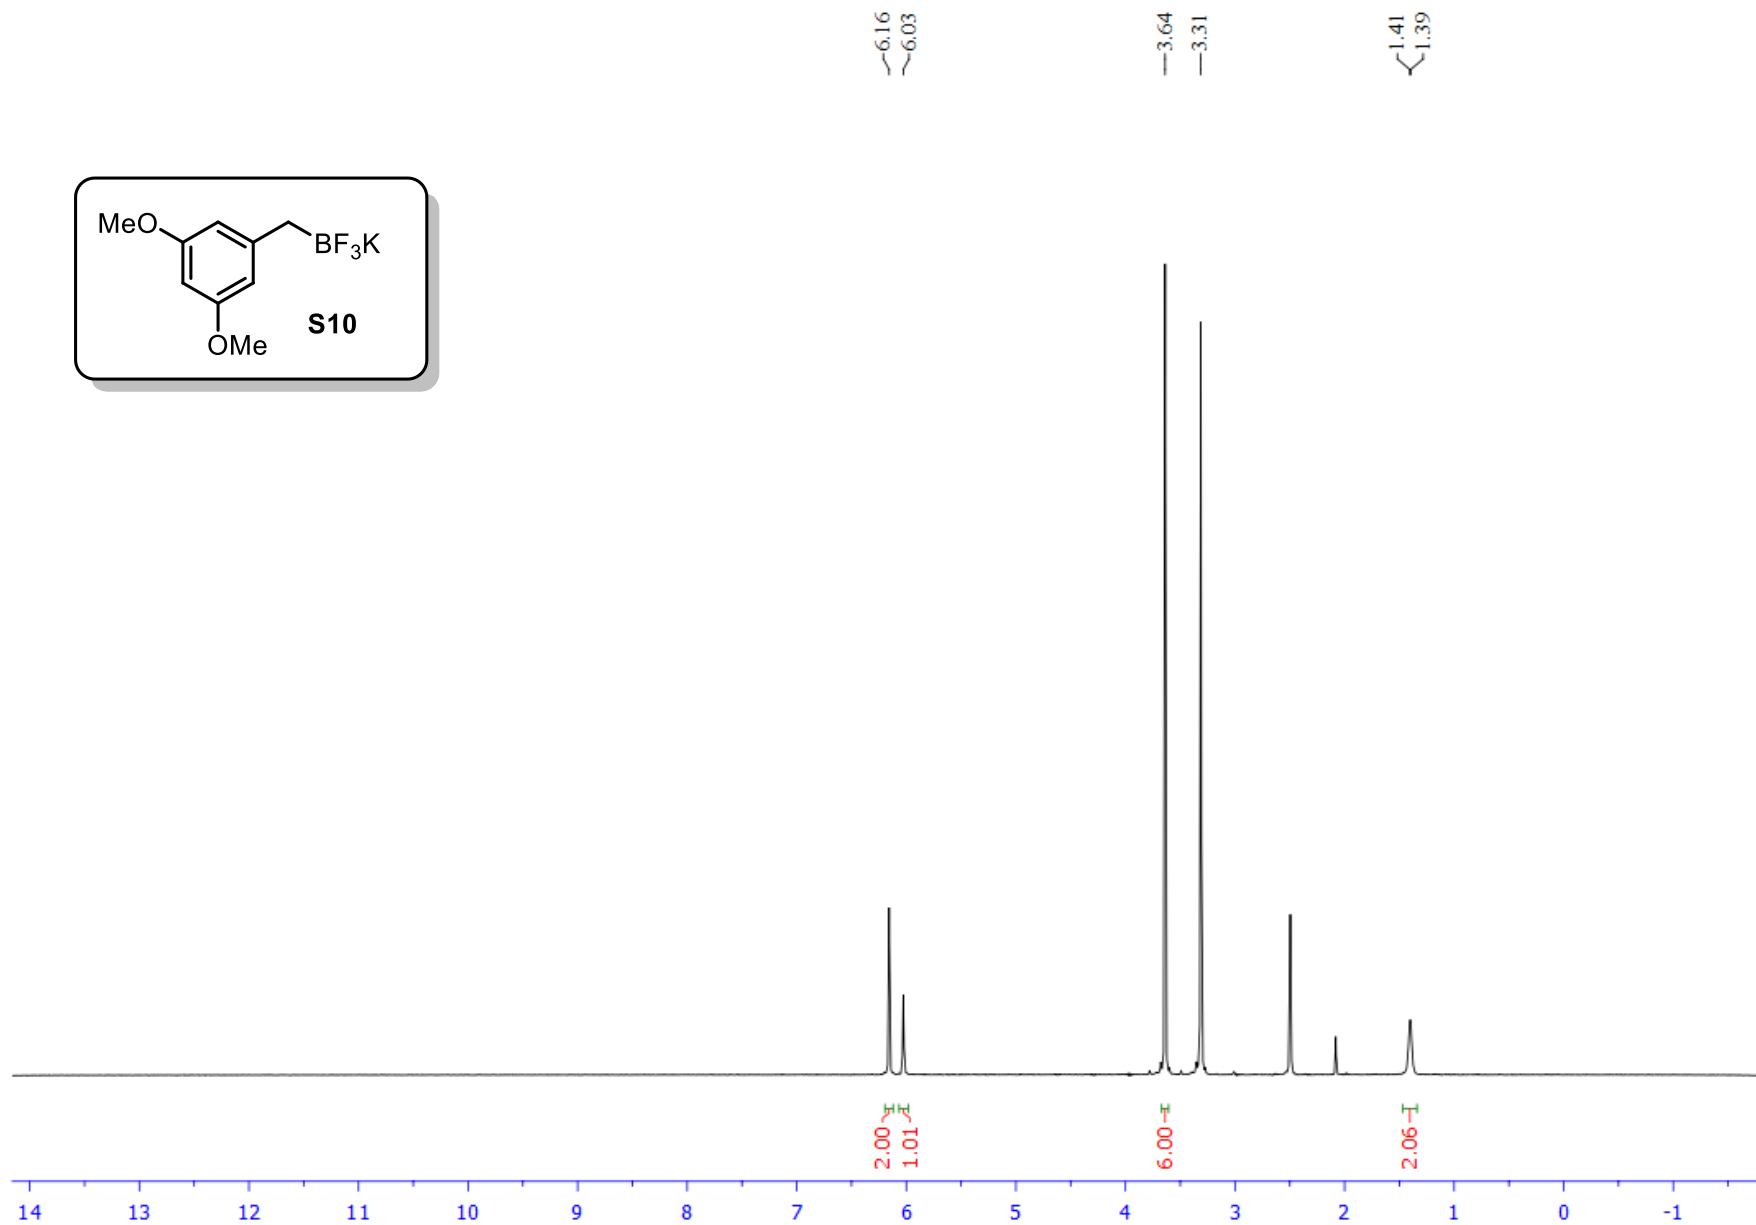

**S115**

$^{13}\text{C}$  NMR (DMSO- $d_6$ , 125.8 MHz) spectrum of potassium (3,5-dimethoxybenzyl)trifluoroborate (**S10**)

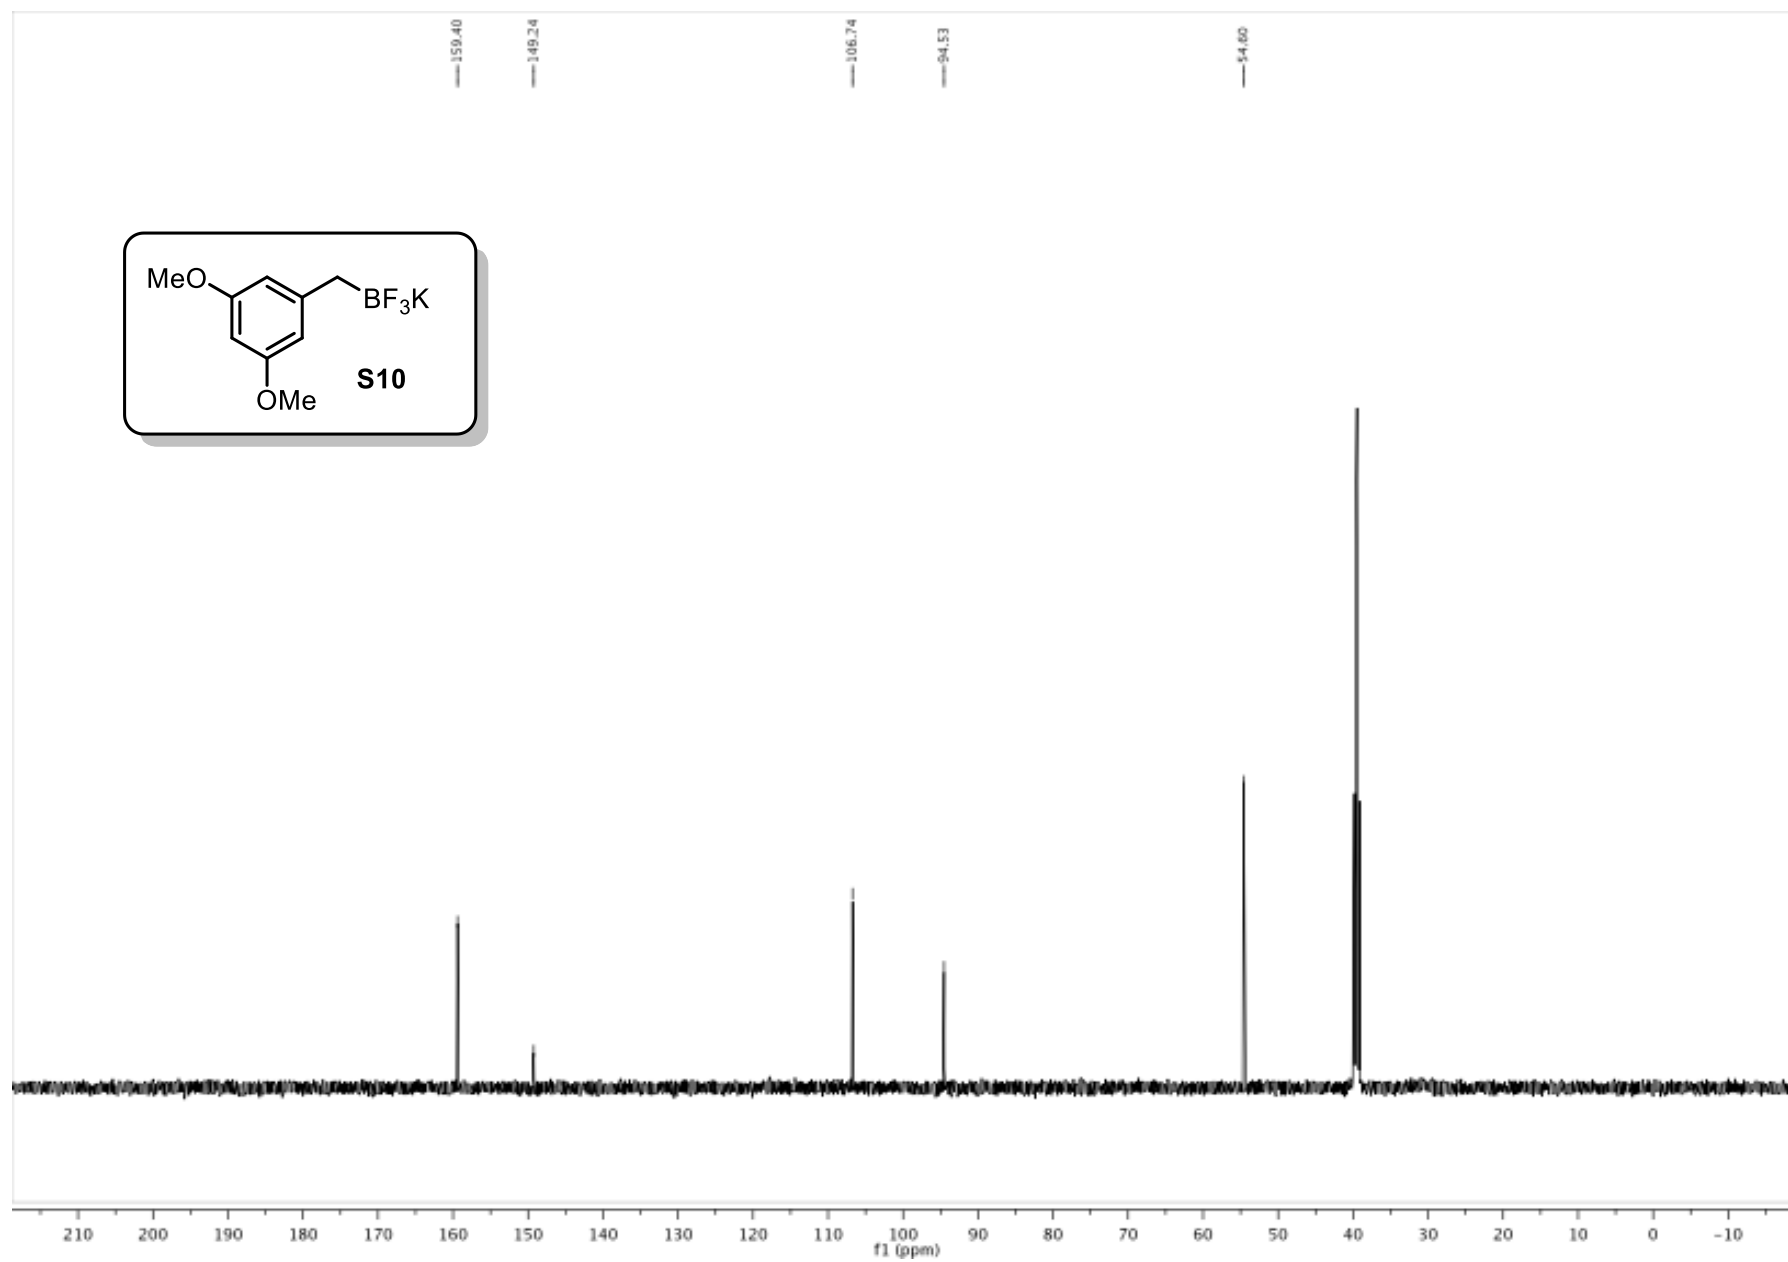

**S116**

$^{19}\text{F}$  NMR (DMSO- $d_6$ , 470.8 MHz) spectrum of potassium (3,5-dimethoxybenzyl)trifluoroborate (**S10**)

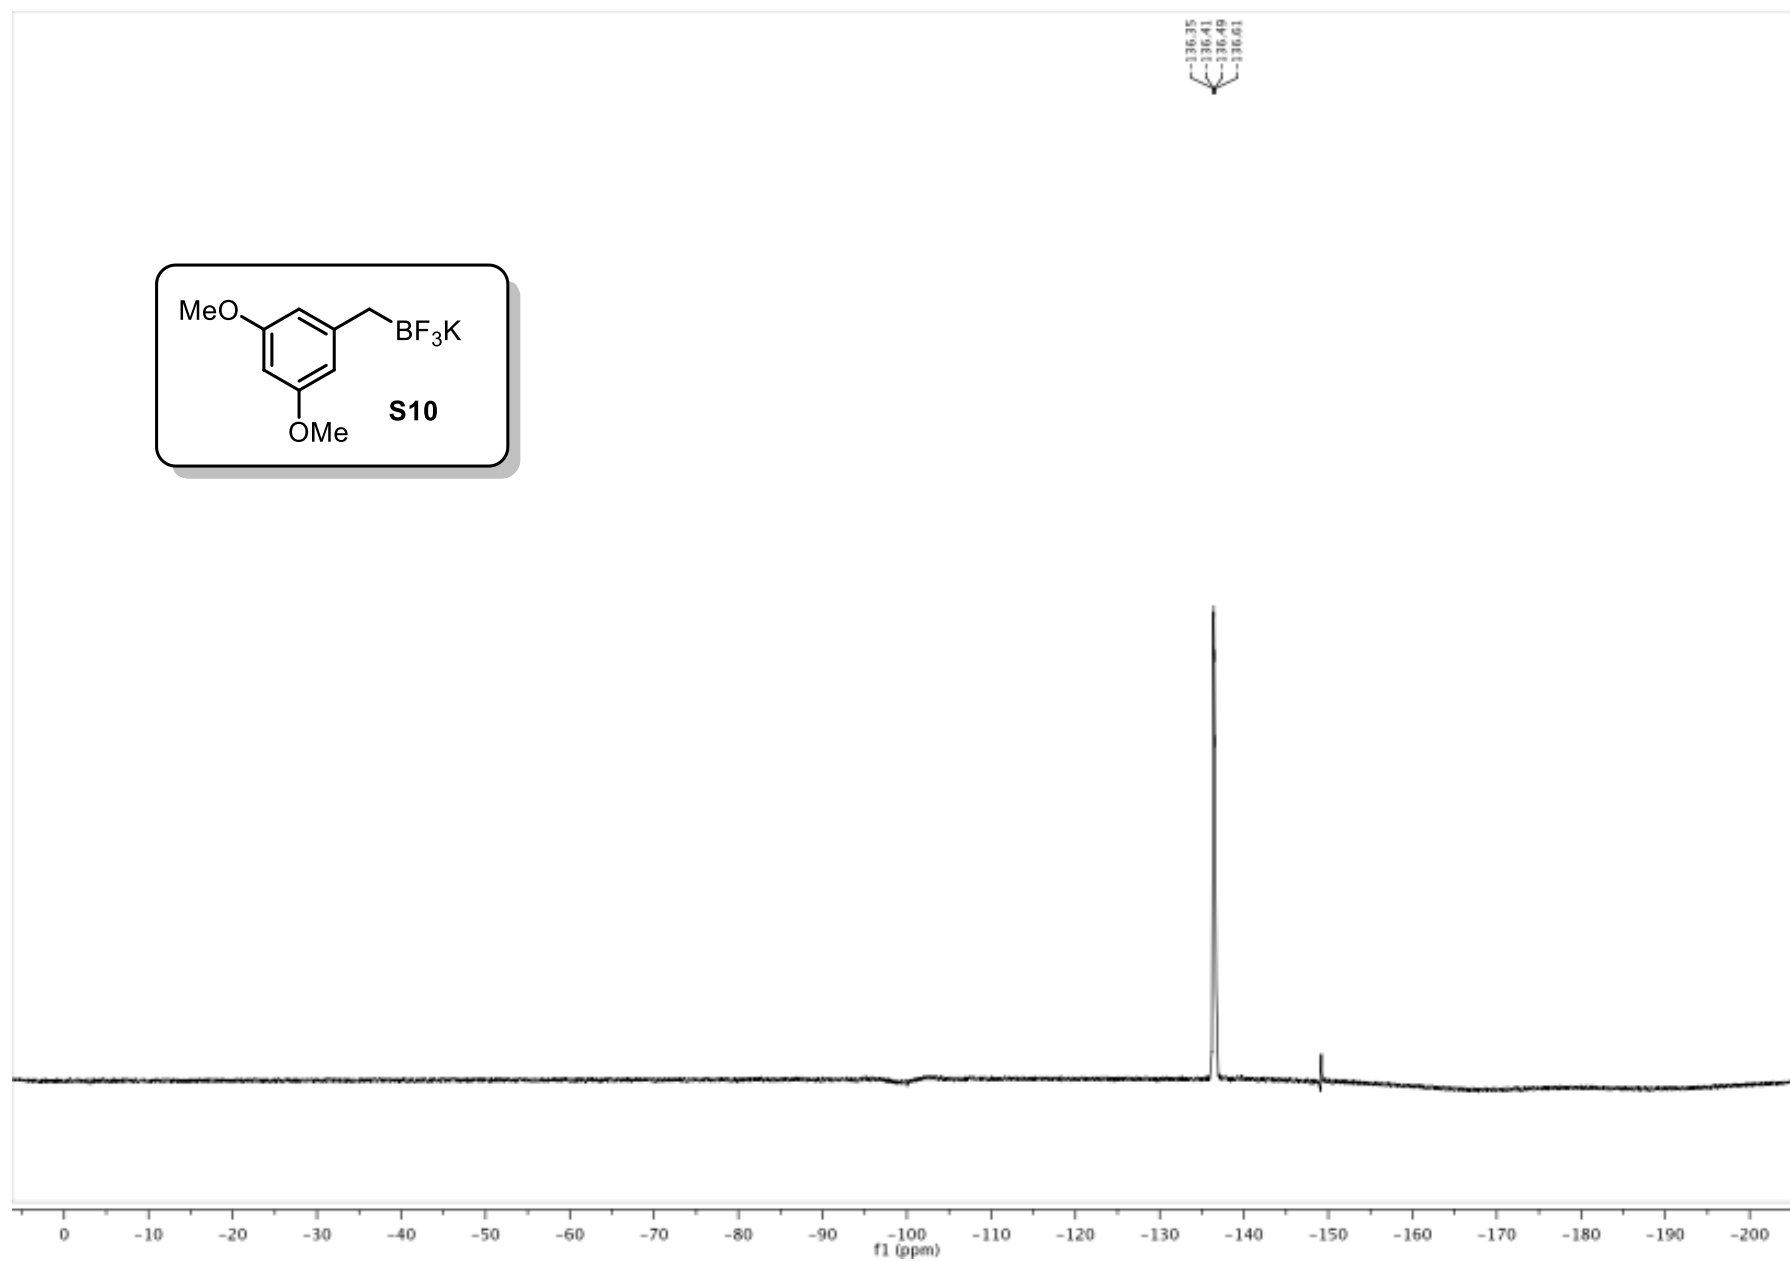

**S117**

$^{11}\text{B}$  NMR (DMSO- $d_6$ , 128.4 MHz) spectrum of potassium (3,5-dimethoxybenzyl)trifluoroborate (**S10**)

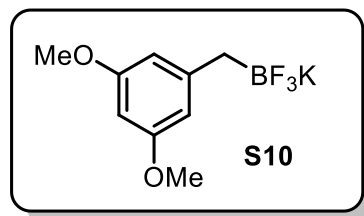

-4.20

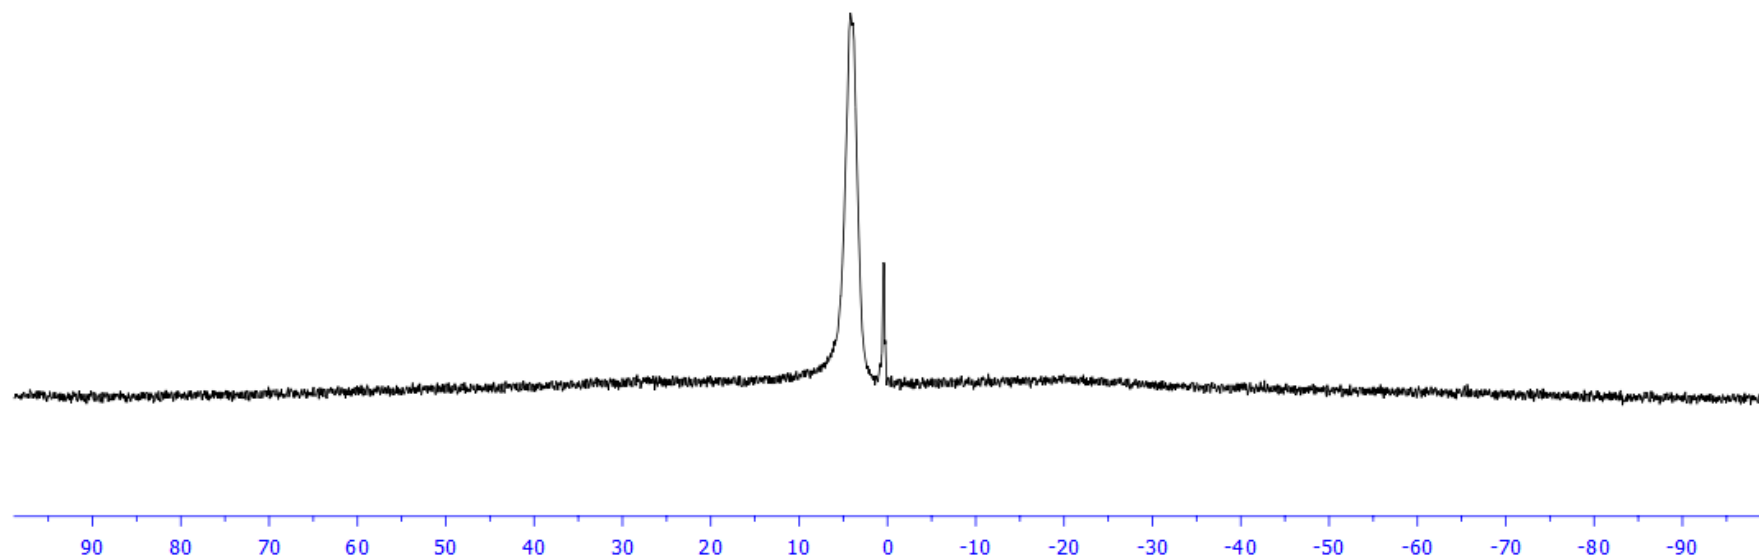

**S118**

$^1\text{H}$  NMR (acetone- $d_6$ , 500 MHz) spectrum of potassium trifluoro(4-(trifluoromethoxy)benzyl)borate (**S11**)

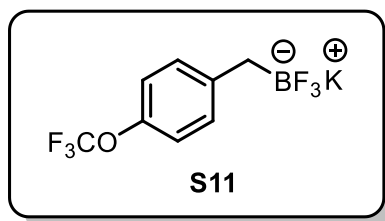

7.17  
7.15  
6.98  
6.97

-2.81

-1.66

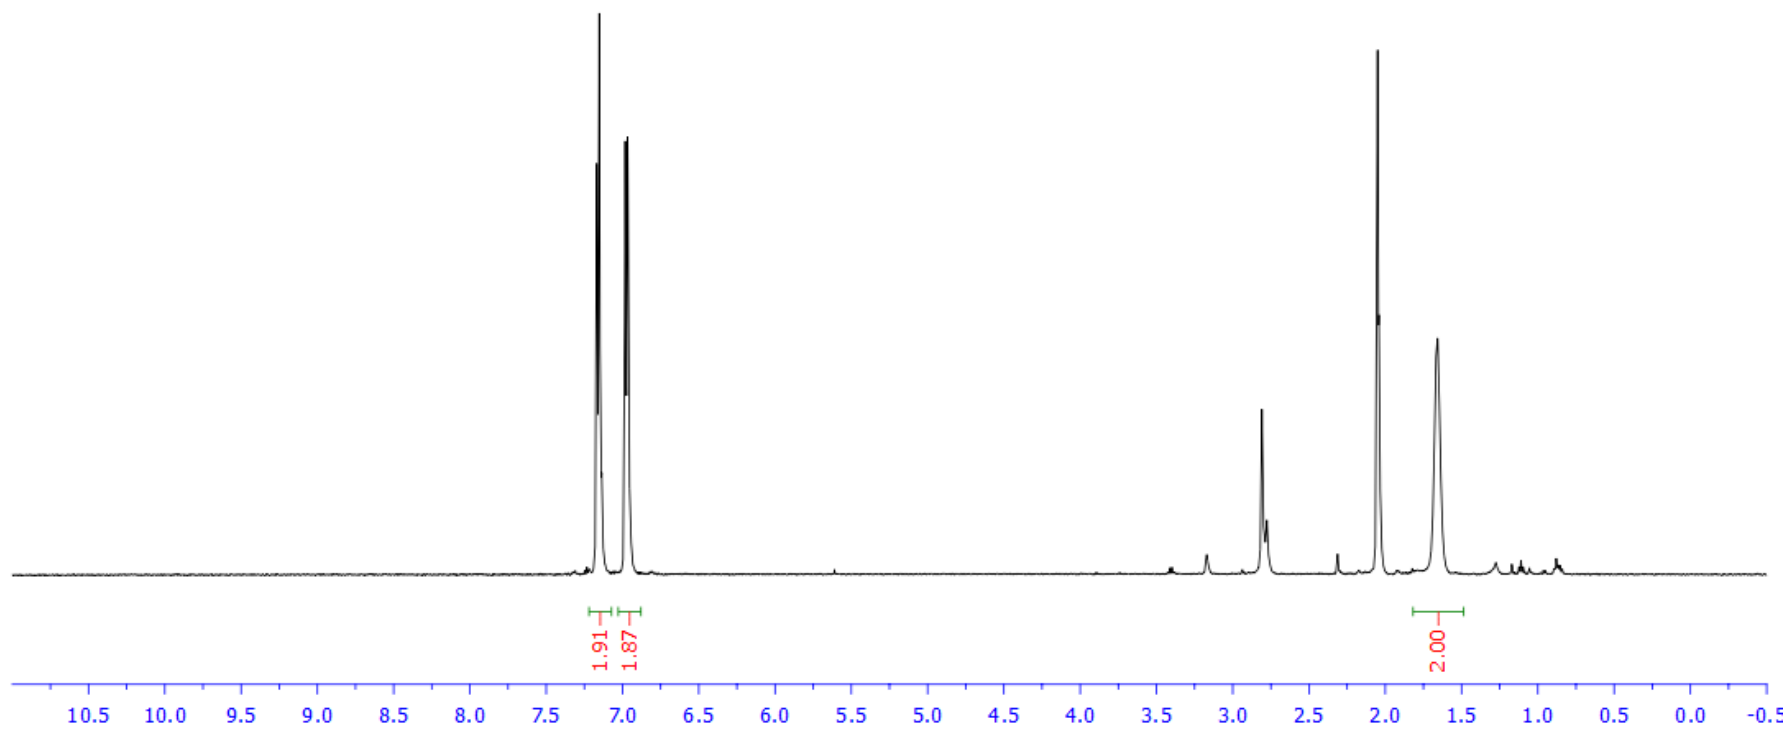

**S119**



$^{13}\text{C}$  NMR (acetone- $d_6$ , 125.8 MHz) spectrum of potassium trifluoro(4-(trifluoromethoxy)benzyl)borate (**S11**)

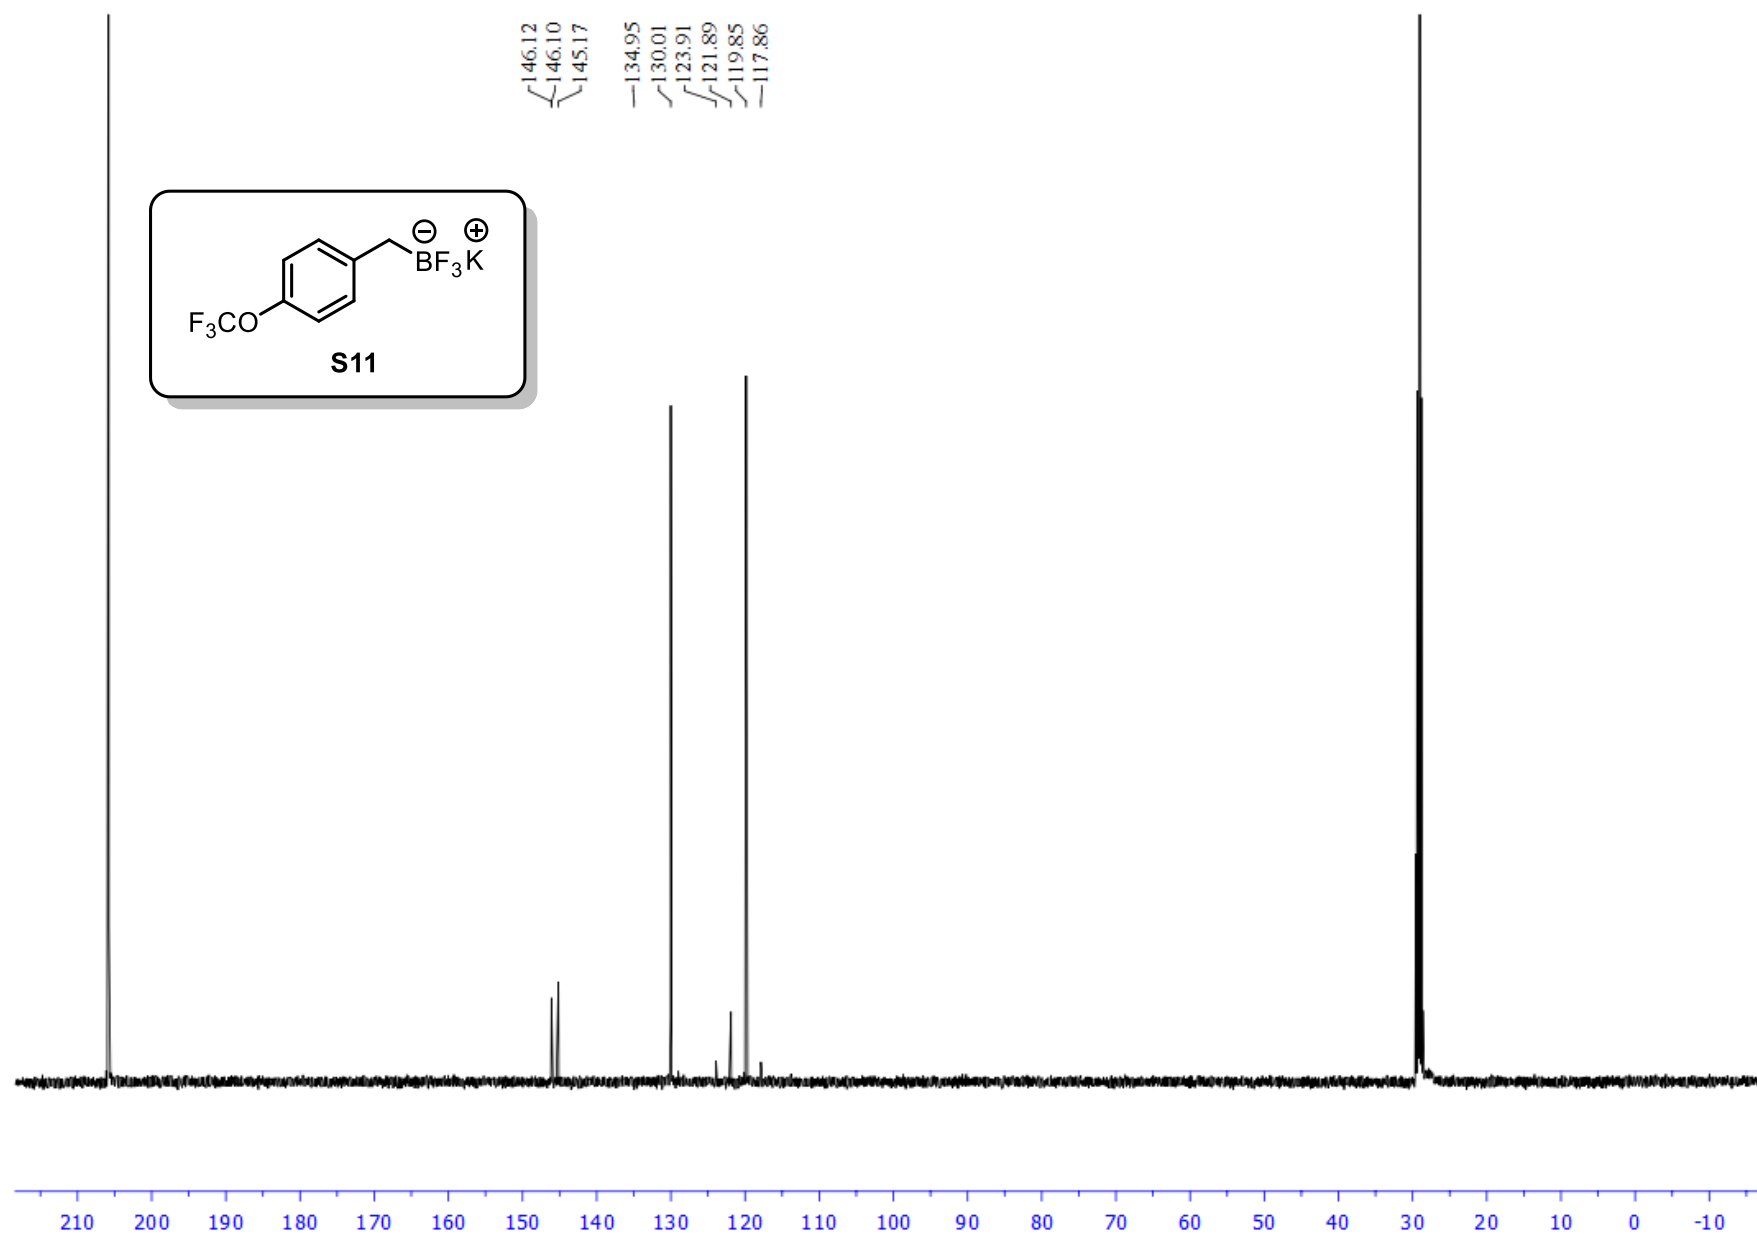

**S120**

$^{11}\text{B}$  NMR (acetone- $d_6$ , 128.4 MHz) spectrum of potassium trifluoro(4-(trifluoromethoxy)benzyl)borate (**S11**)

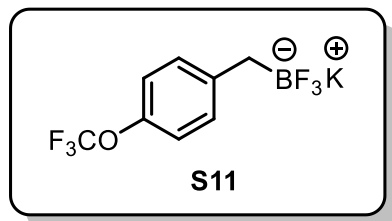

4.90  
4.46

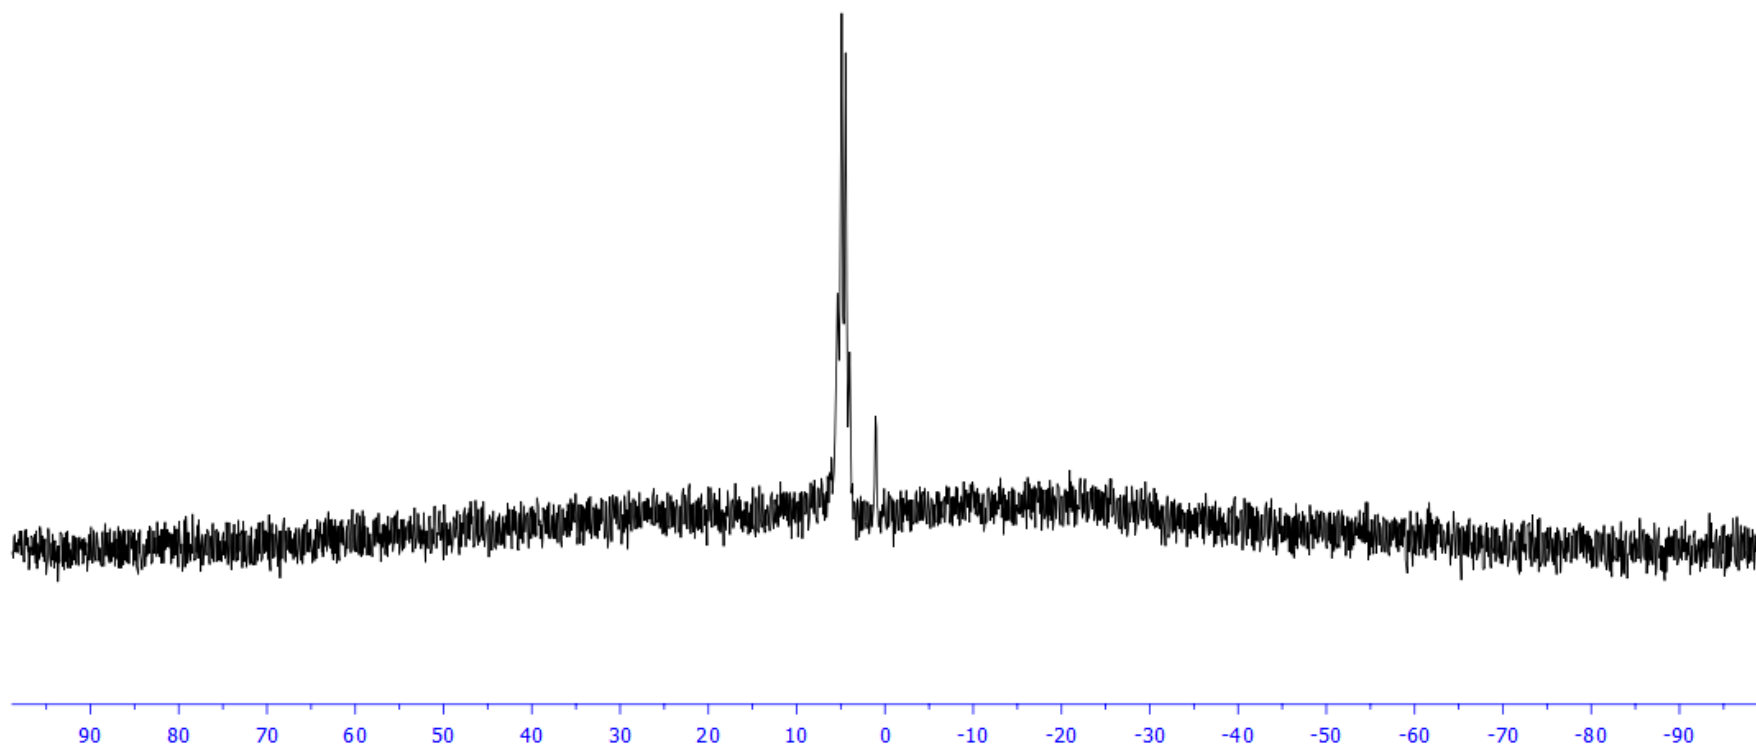

**S121**

$^{19}\text{F}$  NMR (acetone- $d_6$ , 470.8 MHz) spectrum of potassium trifluoro(4-(trifluoromethoxy)benzyl)borate (**S11**)

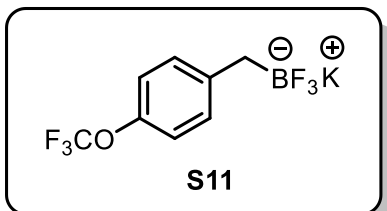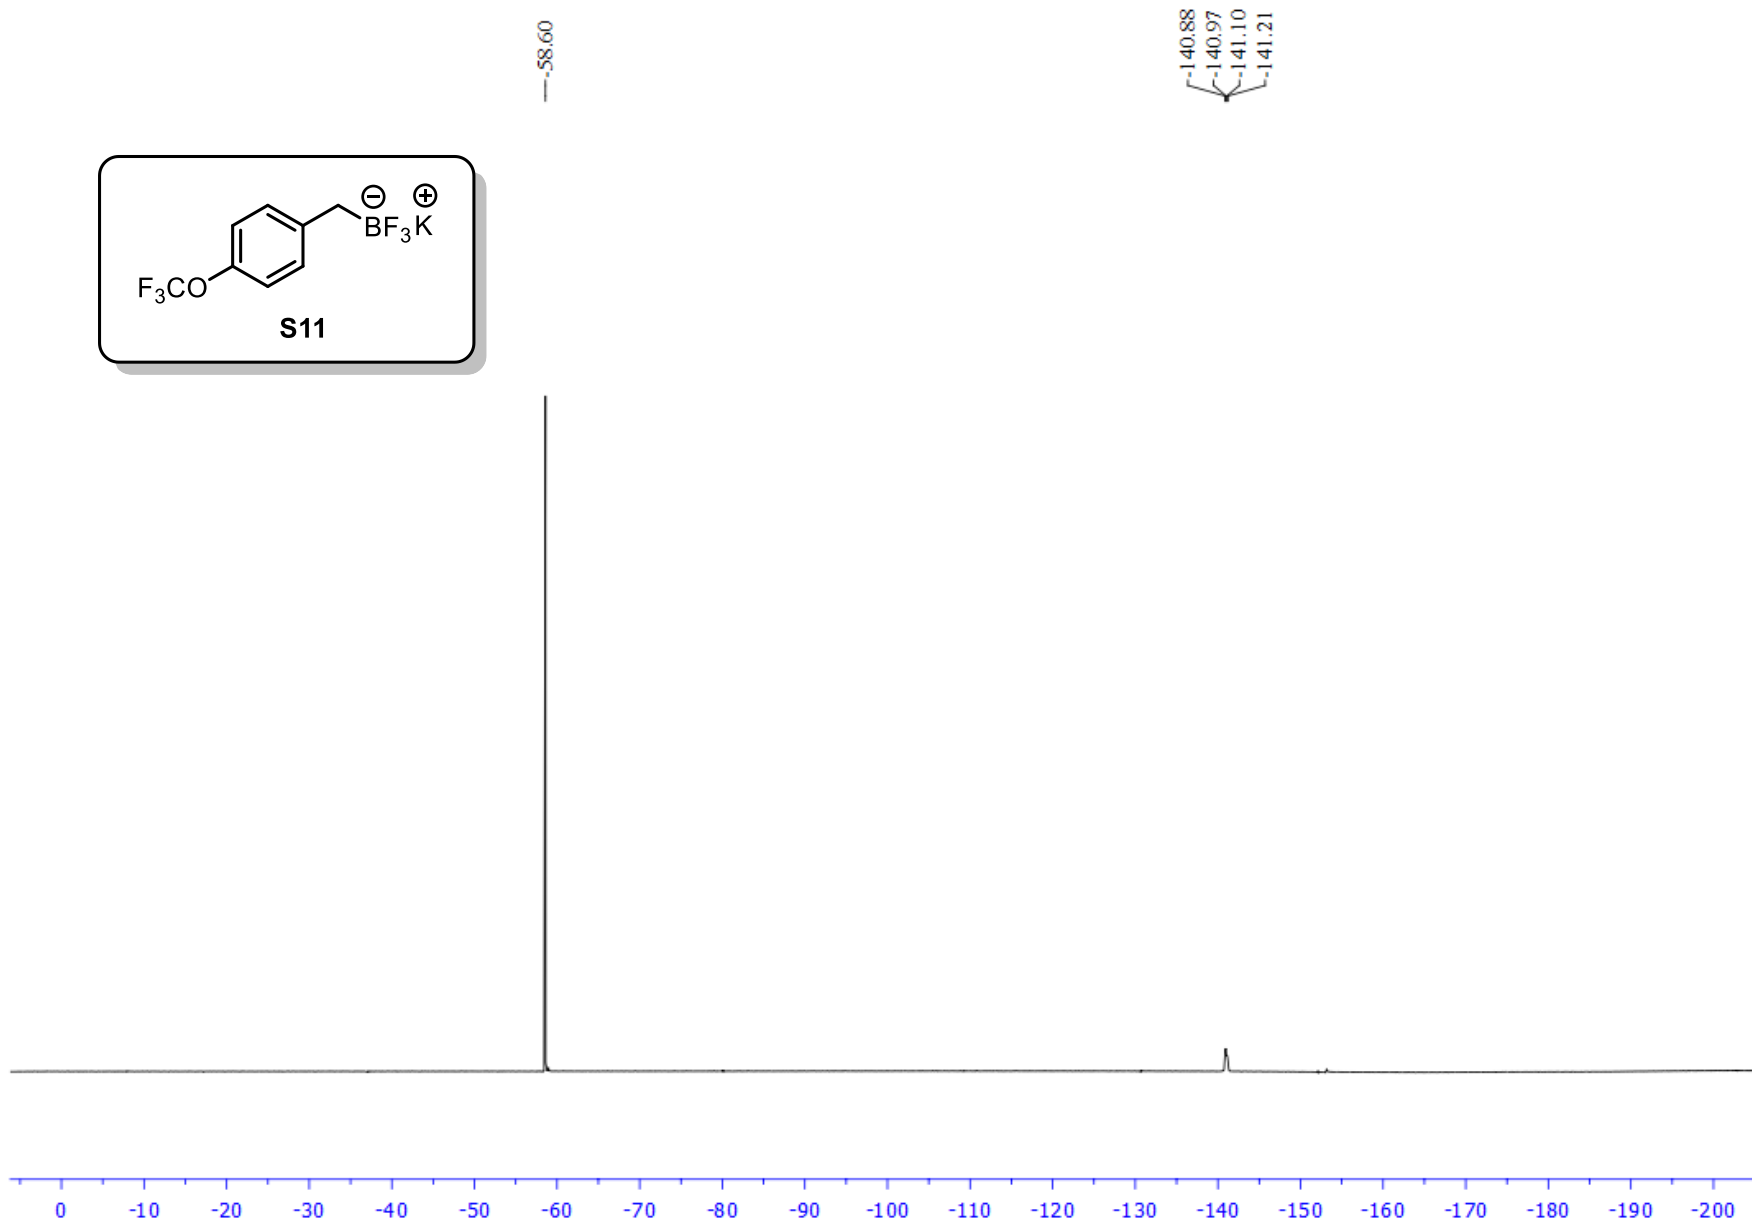

**S122**

$^1\text{H}$  NMR (acetone- $d_6$ , 500 MHz) spectrum of potassium trifluoro(4-methoxybenzyl)borate (**S12**)

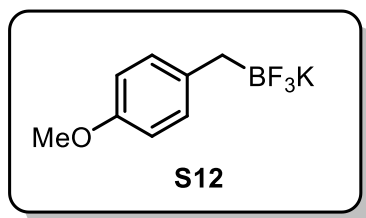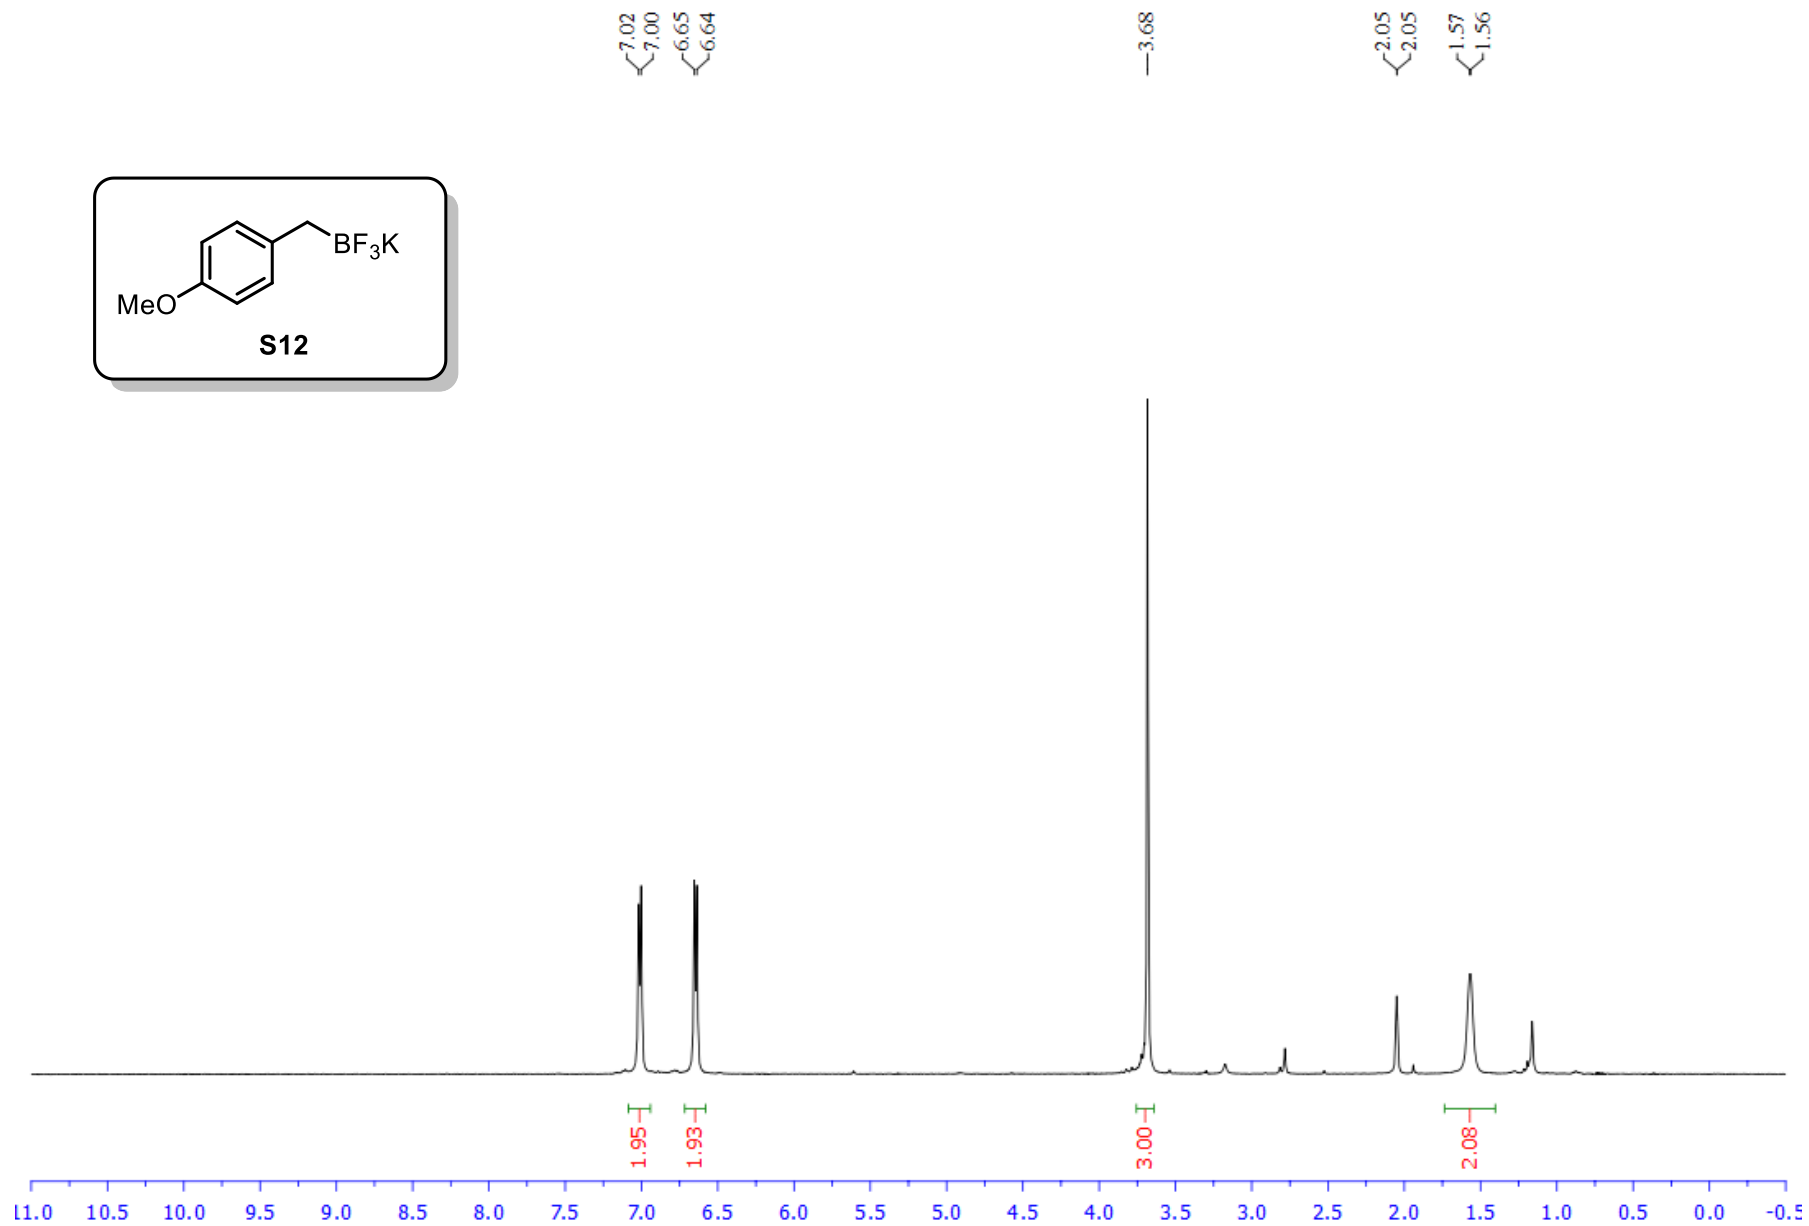

**S123**

$^{13}\text{C}$  NMR (acetone- $d_6$ , 125.8 MHz) spectrum of potassium trifluoro(4-methoxybenzyl)borate (**S12**)

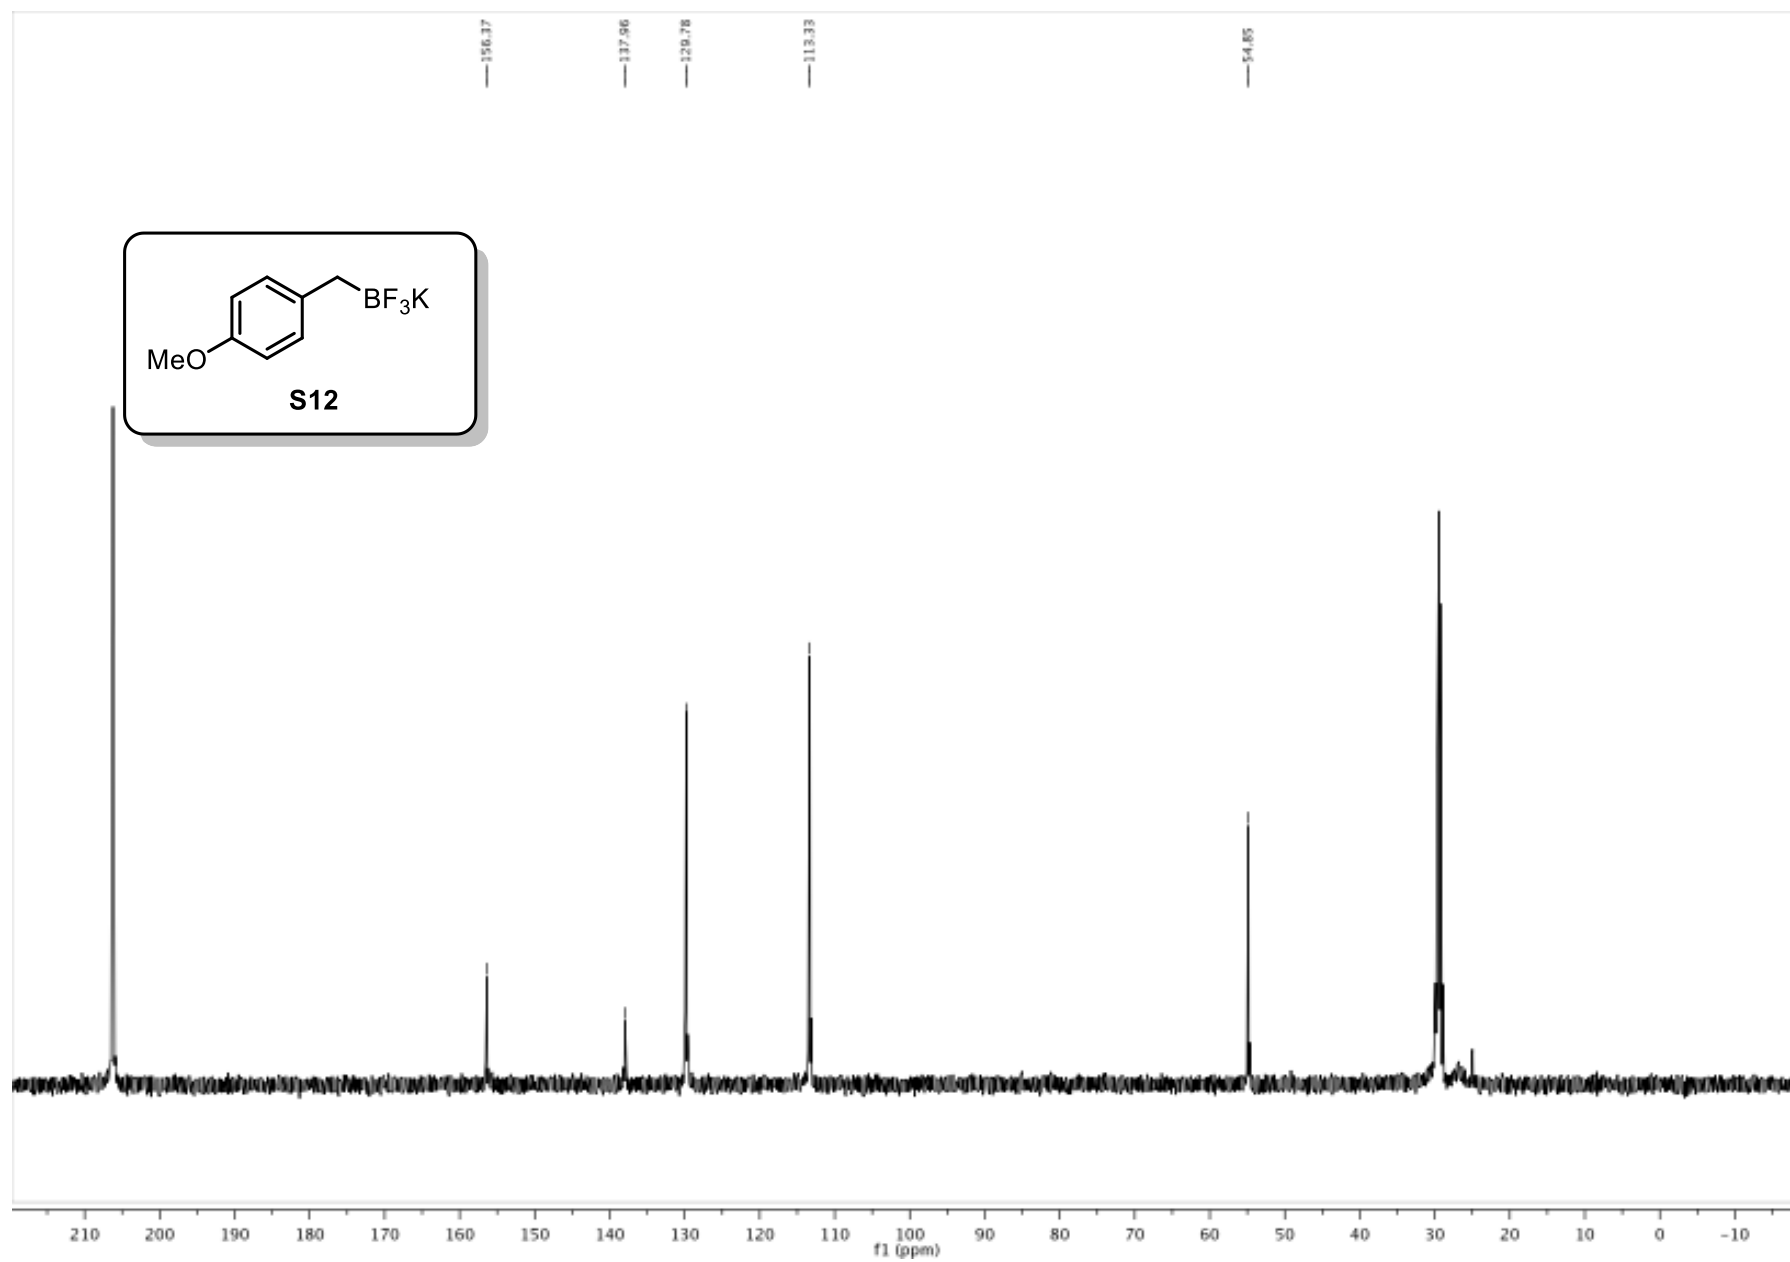

**S124**

$^{19}\text{F}$  NMR (acetone- $\text{d}_6$ , 470.8 MHz) spectrum of potassium trifluoro(4-methoxybenzyl)borate (**S12**)

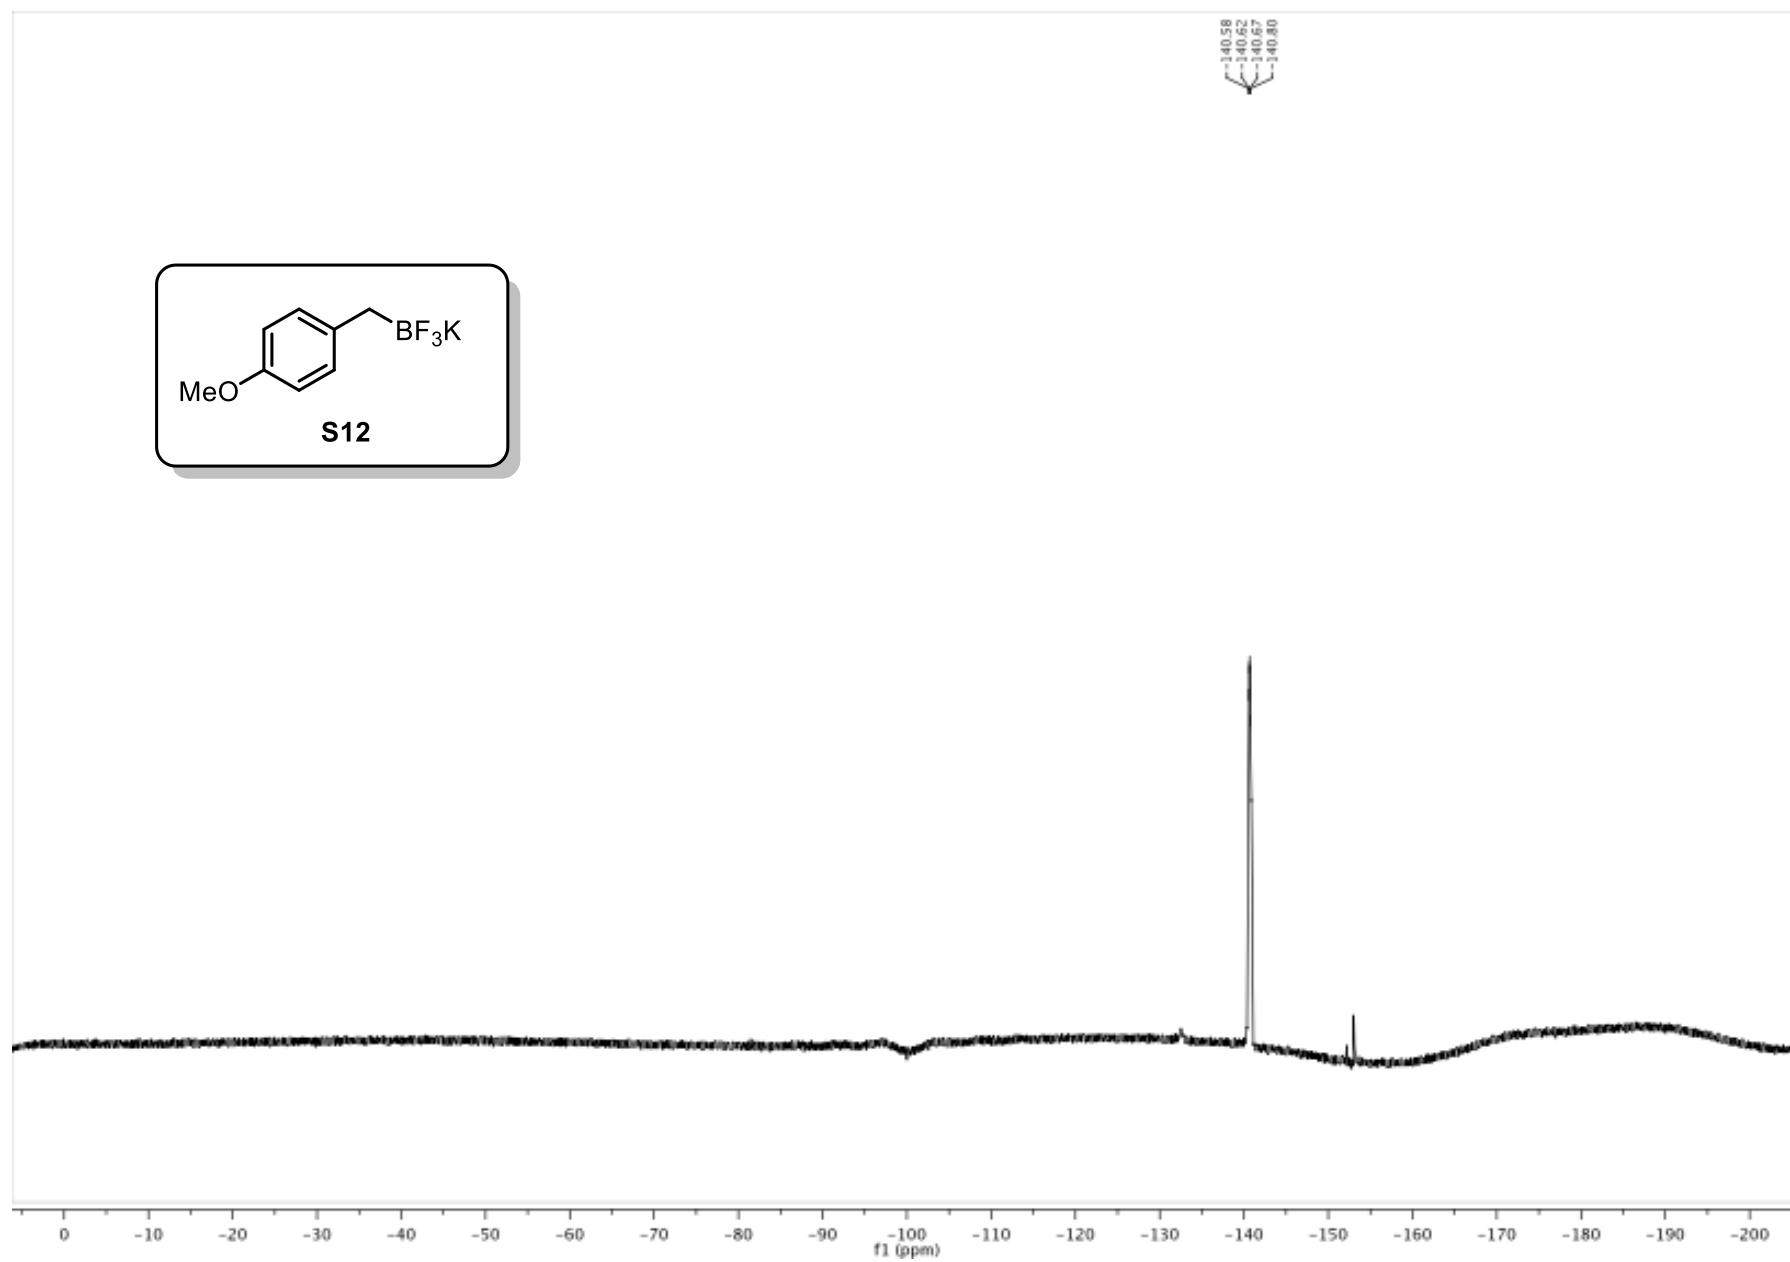

**S125**

$^{11}\text{B}$  NMR (acetone- $\text{d}_6$ , 128.4 MHz) spectrum of potassium trifluoro(4-methoxybenzyl)borate (**S12**)

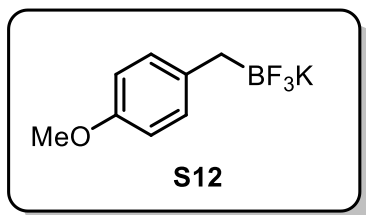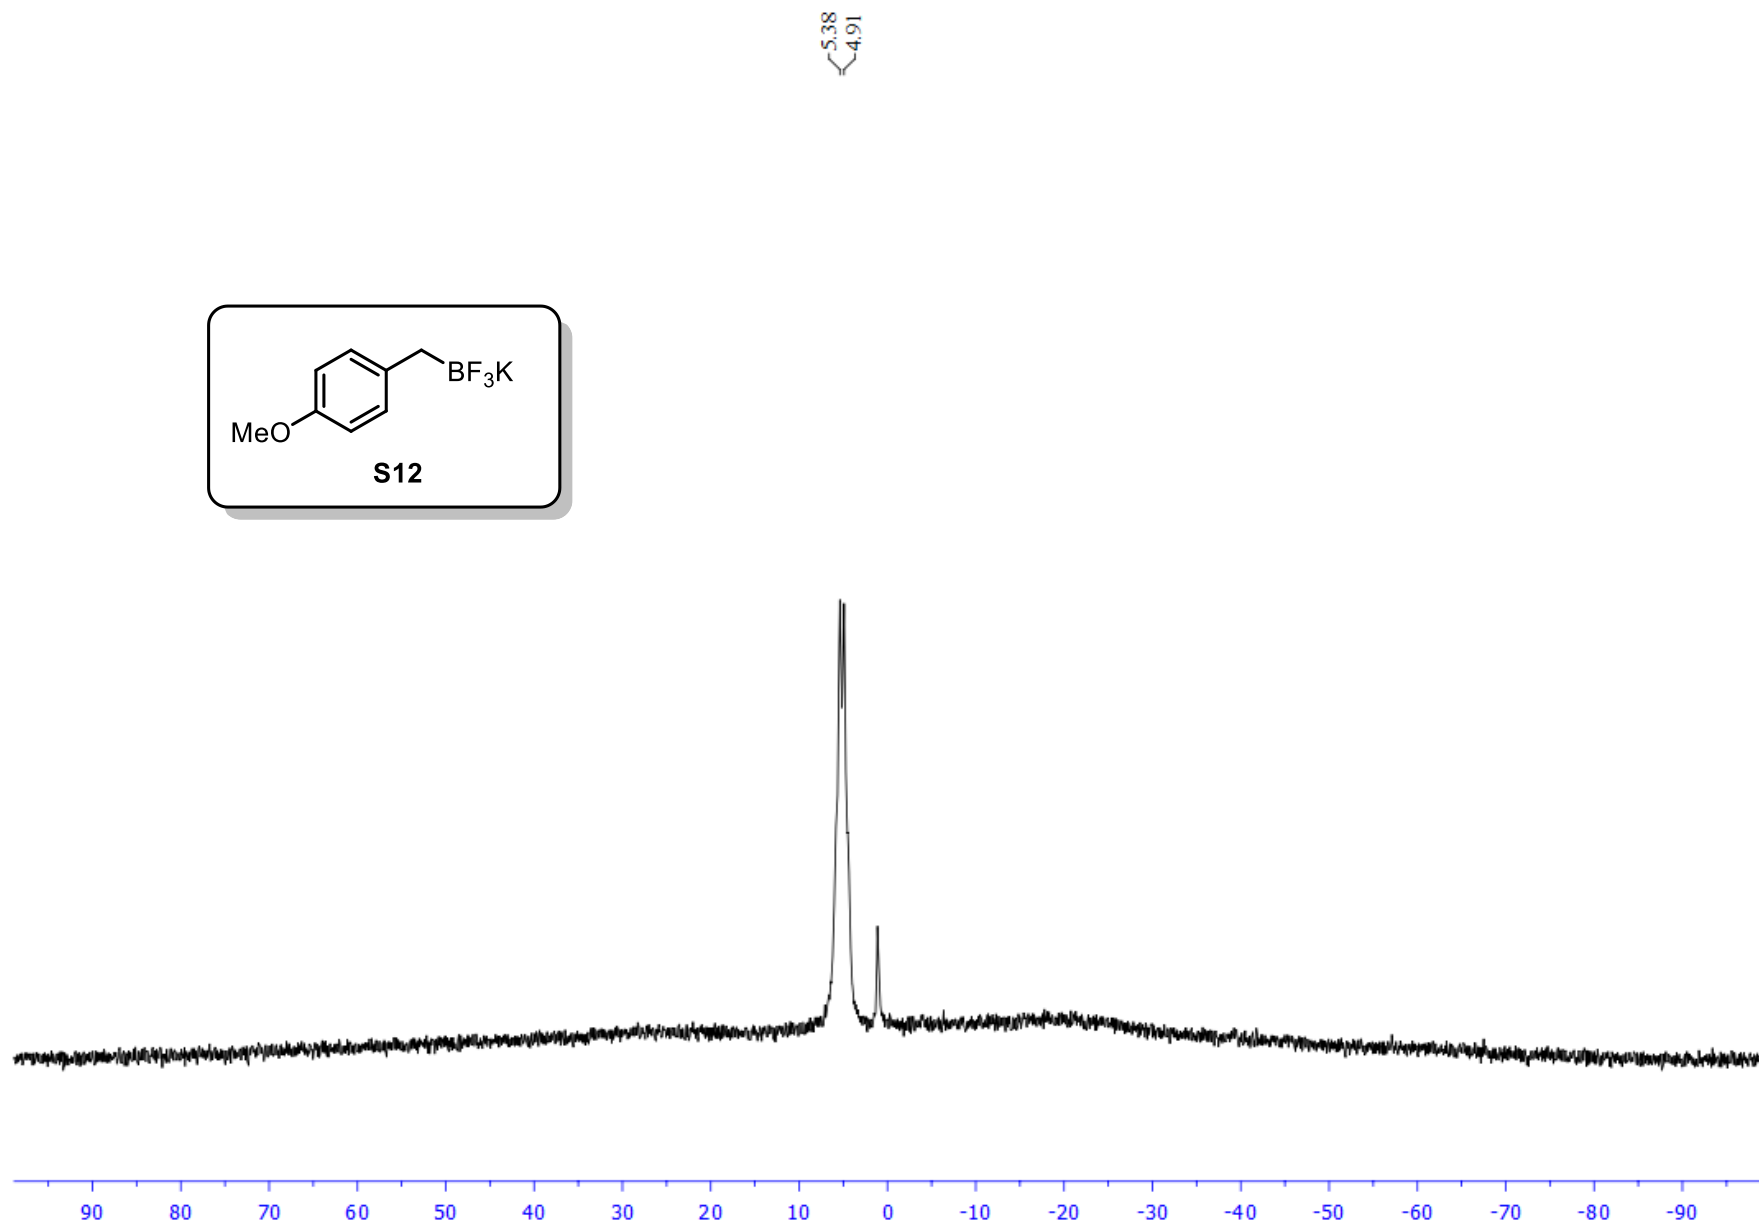

**S126**

## References and Notes

1. A. de Meijere, F. Diederich, Eds., *Metal-Catalyzed Cross-Coupling Reactions* (Wiley-VCH, Weinheim, Germany, ed. 2, 2004).
2. J. F. Hartwig, *Organotransition Metal Chemistry: From Bonding to Catalysis* (University Science, Sausalito, CA, 2010).
3. A. Rudolph, M. Lautens, Secondary alkyl halides in transition-metal-catalyzed cross-coupling reactions. *Angew. Chem. Int. Ed.* **48**, 2656–2670 (2009). [doi:10.1002/anie.200803611](https://doi.org/10.1002/anie.200803611) [Medline](#)
4. L. S. Hegedus, B. C. G. Soderberg, *Transition Metals in the Synthesis of Complex Organic Molecules* (University Science, Sausalito, CA, ed. 3, 2010).
5. H. Doucet, Suzuki-Miyaura cross-coupling reactions of alkylboronic acid derivatives or alkyltrifluoroborates with aryl, alkenyl, and alkyl halides and triflates. *Eur. J. Org. Chem.* **2008**, 2013–2030 (2008). [doi:10.1002/ejoc.200700984](https://doi.org/10.1002/ejoc.200700984)
6. D. Imao, B. W. Glasspoole, V. S. Laberge, C. M. Crudden, Cross coupling reactions of chiral secondary organoboronic esters with retention of configuration. *J. Am. Chem. Soc.* **131**, 5024–5025 (2009). [doi:10.1021/ja8094075](https://doi.org/10.1021/ja8094075) [Medline](#)
7. G. Zou, Y. K. Reddy, J. R. Falck, Ag(I) promoted Suzuki-Miyaura cross-couplings of *n*-alkylboronic acids. *Tetrahedron Lett.* **42**, 7213–7215 (2001). [doi:10.1016/S0040-4039\(01\)01536-2](https://doi.org/10.1016/S0040-4039(01)01536-2)
8. J. Z. Deng, D. V. Paone, A. T. Ginnetti, H. Kurihara, S. D. Dreher, S. A. Weissman, S. R. Stauffer, C. S. Burgey, Copper-facilitated Suzuki reactions: Application to 2-heterocyclic boronates. *Org. Lett.* **11**, 345–347 (2009). [doi:10.1021/ol802556f](https://doi.org/10.1021/ol802556f) [Medline](#)
9. M. Aufiero, F. Proutiere, F. Schoenebeck, Redox reactions in palladium catalysis: On the accelerating and/or inhibiting effects of copper and silver salt additives in cross-coupling chemistry involving electron-rich phosphine ligands. *Angew. Chem. Int. Ed.* **51**, 7226–7230 (2012). [doi:10.1002/anie.201202504](https://doi.org/10.1002/anie.201202504) [Medline](#)
10. Transmetalation rates of organoboron compounds adhere to trends established for the corresponding organostannanes.



11. J. W. Labadie, J. K. Stille, Mechanisms of palladium-catalyzed couplings of acid chlorides with organotin reagents. *J. Am. Chem. Soc.* **105**, 6129–6137 (1983).  
[doi:10.1021/ja00357a026](https://doi.org/10.1021/ja00357a026)
12. A. Finch, P. J. Gardner, E. J. Pearn, G. B. Watts, Thermochemistry of triphenylboron, tricyclohexylboron and some phenylboron halides. *Trans. Faraday Soc.* **63**, 1880–1888 (1967). [doi:10.1039/tf9676301880](https://doi.org/10.1039/tf9676301880)
13. C. K. Prier, D. A. Rankic, D. W. C. MacMillan, Visible light photoredox catalysis with transition metal complexes: Applications in organic synthesis. *Chem. Rev.* **113**, 5322–5363 (2013). [doi:10.1021/cr300503r](https://doi.org/10.1021/cr300503r) [Medline](#)
14. D. M. Schultz, T. P. Yoon, Solar synthesis: Prospects in visible light photocatalysis. *Science* **343**, 1239176 (2014). [doi:10.1126/science.1239176](https://doi.org/10.1126/science.1239176) [Medline](#)
15. D. Kalyani, K. B. McMurtrey, S. R. Neufeldt, M. S. Sanford, Room-temperature C-H arylation: Merger of Pd-catalyzed C-H functionalization and visible-light photocatalysis. *J. Am. Chem. Soc.* **133**, 18566–18569 (2011). [doi:10.1021/ja208068w](https://doi.org/10.1021/ja208068w) [Medline](#)
16. Y. Ye, M. S. Sanford, Merging visible-light photocatalysis and transition-metal catalysis in the copper-catalyzed trifluoromethylation of boronic acids with CF<sub>3</sub>I. *J. Am. Chem. Soc.* **134**, 9034–9037 (2012). [doi:10.1021/ja301553c](https://doi.org/10.1021/ja301553c) [Medline](#)
17. B. Sahoo, M. N. Hopkinson, F. Glorius, Combining gold and photoredox catalysis: Visible light-mediated oxy- and aminoarylation of alkenes. *J. Am. Chem. Soc.* **135**, 5505–5508 (2013). [doi:10.1021/ja400311h](https://doi.org/10.1021/ja400311h) [Medline](#)
18. J. W. Lockner, D. D. Dixon, R. Risgaard, P. S. Baran, Practical radical cyclizations with arylboronic acids and trifluoroborates. *Org. Lett.* **13**, 5628–5631 (2011).  
[doi:10.1021/ol2023505](https://doi.org/10.1021/ol2023505) [Medline](#)
19. G. A. Molander, V. Colombel, V. A. Braz, Direct alkylation of heteroaryls using potassium alkyl- and alkoxymethyltrifluoroborates. *Org. Lett.* **13**, 1852–1855 (2011).  
[doi:10.1021/ol2003572](https://doi.org/10.1021/ol2003572) [Medline](#)
20. Y. Yasu, T. Koike, M. Akita, Visible light-induced selective generation of radicals from organotrifluoroborates by photoredox catalysis. *Adv. Synth. Catal.* **354**, 3414–3420 (2012). [doi:10.1002/adsc.201200588](https://doi.org/10.1002/adsc.201200588)

21. K. Miyazawa, Y. Yasu, T. Koike, M. Akita, Visible-light-induced hydroalkoxymethylation of electron-deficient alkenes by photoredox catalysis. *Chem. Commun.* **49**, 7249–7251 (2013). [doi:10.1039/c3cc42695e](https://doi.org/10.1039/c3cc42695e) [Medline](#)
22. All electrochemical potentials calculated versus the saturated calomel electrode (SCE).
23. M. Lowry, J. Goldsmith, J. Slinker, R. Rohl, R. A. Pascal, G. G. Malliaras, S. Bernhard, Single-layer electroluminescent devices and photoinduced hydrogen production from an ionic iridium(III) complex. *Chem. Mater.* **17**, 5712–5719 (2005). [doi:10.1021/cm051312+](https://doi.org/10.1021/cm051312+)
24. C. Cannes, E. Labbé, M. Durandetti, M. Devaud, J. Y. Nédélec, Nickel-catalyzed electrochemical homocoupling of alkenyl halides: Rates and mechanisms. *J. Electroanal. Chem.* **412**, 85–93 (1996). [doi:10.1016/0022-0728\(96\)04605-0](https://doi.org/10.1016/0022-0728(96)04605-0)
25. The reduction of (bpy)NiBr<sub>2</sub> is observed as a two-electron wave at -1.1 V, implying that reduction of (bpy)NiBr to (bpy)Ni<sup>0</sup> occurs at a more positive potential.
26. See supplementary materials on *Science Online*.
27. M. E. Welsch, S. A. Snyder, B. R. Stockwell, Privileged scaffolds for library design and drug discovery. *Curr. Opin. Chem. Biol.* **14**, 347–361 (2010). [doi:10.1016/j.cbpa.2010.02.018](https://doi.org/10.1016/j.cbpa.2010.02.018) [Medline](#)
28. P. Jain, S. Yi, P. T. Flaherty, Suzuki-Miyaura cross-coupling of potassium organoborates with 6-sulfonate benzimidazoles using microwave irradiation. *J. Heterocycl. Chem.* **50**, (S1), E166–E173 (2013). [doi:10.1002/jhet.1109](https://doi.org/10.1002/jhet.1109)
29. A. Flaherty, A. Trunkfield, W. Barton, Palladium-catalyzed cross-coupling of B-benzyl-9-borabicyclo[3.3.1]nonane to furnish methylene-linked biaryls. *Org. Lett.* **7**, 4975–4978 (2005). [doi:10.1021/ol051929x](https://doi.org/10.1021/ol051929x) [Medline](#)
30. G. A. Molander, T. Ito, Cross-coupling reactions of potassium alkyltrifluoroborates with aryl and 1-alkenyl trifluoromethanesulfonates. *Org. Lett.* **3**, 393–396 (2001). [doi:10.1021/ol006896u](https://doi.org/10.1021/ol006896u) [Medline](#)

31. G. A. Molander, S. R. Wisniewski, Stereospecific cross-coupling of secondary organotrifluoroborates: Potassium 1-(benzyloxy)alkyltrifluoroborates. *J. Am. Chem. Soc.* **134**, 16856–16868 (2012). [doi:10.1021/ja307861n](https://doi.org/10.1021/ja307861n) [Medline](#)
32. L. Li, C.-Y. Wang, R. Huang, M. R. Biscoe, Stereoretentive Pd-catalysed Stille cross-coupling reactions of secondary alkyl azastannatranes and aryl halides. *Nat. Chem.* **5**, 607–612 (2013). [doi:10.1038/nchem.1652](https://doi.org/10.1038/nchem.1652) [Medline](#)
33. T. Hayashi, M. Tajika, K. Tamao, M. Kumada, High stereoselectivity in asymmetric Grignard cross-coupling catalyzed by nickel complexes of chiral (aminoalkylferrocenyl)phosphines. *J. Am. Chem. Soc.* **98**, 3718–3719 (1976). [doi:10.1021/ja00428a061](https://doi.org/10.1021/ja00428a061)
34. T. Hayashi, M. Konishi, M. Fukushima, T. Mise, M. Kagotani, M. Tajika, M. Kumada, Asymmetric synthesis catalyzed by chiral ferrocenylphosphine-transition metal complexes. 2. Nickel- and palladium-catalyzed asymmetric Grignard cross-coupling. *J. Am. Chem. Soc.* **104**, 180–186 (1982). [doi:10.1021/ja00365a033](https://doi.org/10.1021/ja00365a033)
35. C. J. Cordier, R. J. Lundgren, G. C. Fu, Enantioconvergent cross-couplings of racemic alkylmetal reagents with unactivated secondary alkyl electrophiles: Catalytic asymmetric Negishi  $\alpha$ -alkylations of *N*-Boc-pyrrolidine. *J. Am. Chem. Soc.* **135**, 10946–10949 (2013). [doi:10.1021/ja4054114](https://doi.org/10.1021/ja4054114) [Medline](#)
36. K. Moriya, P. Knochel, Diastereoconvergent Negishi cross-coupling using functionalized cyclohexylzinc reagents. *Org. Lett.* **16**, 924–927 (2014). [doi:10.1021/ol403673e](https://doi.org/10.1021/ol403673e) [Medline](#)
37. H. Q. Do, E. R. R. Chandrashekar, G. C. Fu, Nickel/bis(oxazoline)-catalyzed asymmetric Negishi arylations of racemic secondary benzylic electrophiles to generate enantioenriched 1,1-diaryllkanes. *J. Am. Chem. Soc.* **135**, 16288–16291 (2013). [doi:10.1021/ja408561b](https://doi.org/10.1021/ja408561b) [Medline](#)
38. C. Cazorla, E. Méta y, M. Lemaire, Oxidative nucleophilic substitution: Transformation of alkylboronic derivatives. *Tetrahedron* **67**, 8615–8621 (2011). [doi:10.1016/j.tet.2011.09.055](https://doi.org/10.1016/j.tet.2011.09.055)
39. C.-T. Yang, Z. Q. Zhang, H. Tajuddin, C. C. Wu, J. Liang, J. H. Liu, Y. Fu, M. Czyzewska, P. G. Steel, T. B. Marder, L. Liu, Alkylboronic esters from copper-catalyzed borylation

- of primary and secondary alkyl halides and pseudohalides. *Angew. Chem. Int. Ed.* **51**, 528–532 (2012). [doi:10.1002/anie.201106299](https://doi.org/10.1002/anie.201106299) [Medline](#)
40. T. Ishiyama, A. Z. Oohashi, T. Ahiko, N. Miyaura, Nucleophilic borylation of benzyl halides with bis (pinacolato) diboron catalyzed by palladium(0) complexes. *Chem. Lett.* **31**, 780–781 (2002). [doi:10.1246/cl.2002.780](https://doi.org/10.1246/cl.2002.780)
41. D. Hanss, J. C. Freys, G. Bernardinelli, O. S. Wenger, Cyclometalated iridium(III) complexes as photosensitizers for long-range electron transfer: Occurrence of a coulomb barrier. *Eur. J. Inorg. Chem.* **2009**, 4850–4859 (2009). [doi:10.1002/ejic.200900673](https://doi.org/10.1002/ejic.200900673)
42. G. A. Molander, B. Biolatto, Palladium-catalyzed Suzuki-Miyaura cross-coupling reactions of potassium aryl- and heteroaryltrifluoroborates. *J. Org. Chem.* **68**, 4302–4314 (2003). [doi:10.1021/jo0342368](https://doi.org/10.1021/jo0342368) [Medline](#)
43. Z. Liu, N. Dong, M. Xu, Z. Sun, T. Tu, Mild Negishi cross-coupling reactions catalyzed by acenaphthoimidazolylidene palladium complexes at low catalyst loadings. *J. Org. Chem.* **78**, 7436–7444 (2013). [doi:10.1021/jo400803s](https://doi.org/10.1021/jo400803s) [Medline](#)
44. G. Schäfer, J. W. Bode, Friedel-Crafts benzylation of activated and deactivated arenes. *Angew. Chem. Int. Ed.* **50**, 10913–10916 (2011). [doi:10.1002/anie.201105380](https://doi.org/10.1002/anie.201105380) [Medline](#)
45. M. Giannangeli, L. Baiocchi, Aromatization of aliphatic compounds—V: M-dialkylbenzenes and 2-benzyl-naphthalenes. *Tetrahedron* **36**, 1381–1384 (1980). [doi:10.1016/0040-4020\(80\)85052-6](https://doi.org/10.1016/0040-4020(80)85052-6)
46. C. C. Kofink, P. Knochel, Synthesis of functionalized diarylmethanes via a copper-catalyzed cross-coupling of arylmagnesium reagents with benzylic phosphates. *Org. Lett.* **8**, 4121–4124 (2006). [doi:10.1021/ol0616790](https://doi.org/10.1021/ol0616790) [Medline](#)
47. G. J. Perni, J. D. Kilburn, J. W. Essex, R. J. Mortishire-Smith, M. Rowley, Synthesis of functionalized diarylmethanes via a copper-catalyzed cross-coupling of arylmagnesium reagents with benzylic phosphates. *J. Am. Chem. Soc.* **118**, 10220–10227 (1996).
48. R. B. Bedford, M. Huwe, M. C. Wilkinson, Iron-catalysed Negishi coupling of benzyl halides and phosphates. *Chem. Commun.* **5**, 600–602 (2009). [doi:10.1039/b818961g](https://doi.org/10.1039/b818961g) [Medline](#)

49. J. R. Schmink, N. E. Leadbeater, Palladium-catalyzed synthesis of diarylmethanes: Exploitation of carbanionic leaving groups. *Org. Lett.* **11**, 2575–2578 (2009). [doi:10.1021/ol900874z](https://doi.org/10.1021/ol900874z) [Medline](#)
50. L. S. Chupak, J. P. Wolkowski, Y. A. Chantigny, Palladium-catalyzed cross-coupling reactions of benzyl indium reagents with aryl iodides. *J. Org. Chem.* **74**, 1388–1390 (2009). [doi:10.1021/jo802280m](https://doi.org/10.1021/jo802280m) [Medline](#)
51. C.-R. Chen, S. Zhou, D. B. Biradar, H.-M. Gau, Extremely efficient cross-coupling of benzylic halides with aryltitanium tris(isopropoxide) catalyzed by low loadings of a simple palladium(II) acetate/tris(p-tolyl)phosphine system. *Adv. Synth. Catal.* **352**, 1718–1727 (2010). [doi:10.1002/adsc.201000311](https://doi.org/10.1002/adsc.201000311)
52. P. Maity, D. M. Shacklady-McAtee, G. P. A. Yap, E. R. Sirianni, M. P. Watson, Nickel-catalyzed cross couplings of benzylic ammonium salts and boronic acids: Stereospecific formation of diarylethanes via C-N bond activation. *J. Am. Chem. Soc.* **135**, 280–285 (2013). [doi:10.1021/ja3089422](https://doi.org/10.1021/ja3089422) [Medline](#)
53. M. J. Burns, I. J. S. Fairlamb, A. R. Kapdi, P. Sehnal, R. J. K. Taylor, Simple palladium(II) precatalyst for Suzuki-Miyaura couplings: Efficient reactions of benzylic, aryl, heteroaryl, and vinyl coupling partners. *Org. Lett.* **9**, 5397–5400 (2007). [doi:10.1021/ol702291r](https://doi.org/10.1021/ol702291r) [Medline](#)
54. T. C. Fessard, S. P. Andrews, H. Motoyoshi, E. M. Carreira, Enantioselective preparation of 1,1-diarylethanes: Aldehydes as removable steering groups for asymmetric synthesis. *Angew. Chem. Int. Ed.* **46**, 9331–9334 (2007). [doi:10.1002/anie.200702995](https://doi.org/10.1002/anie.200702995) [Medline](#)
